# Supplementary material for: New insight into environmental oxidation of phosmet insecticide initiated by HO˙ radicals in gas and water – a theoretical study
Source: Royal Society of Chemistry journal article supplement (doi:10.1039/d3em00325f), 2023-01-01
Supplement: d3em00325f1.pdf [file d3em00325f1.pdf]

**Electronic Supplementary Material file**

**for the manuscript entitled:**

**New insight into environmental oxidation of phosmet insecticide initiated by HO• radical in gas and water – A theoretical study**

Hisham K. Al Rawas <sup>(a)</sup>, Reem Al Mawla <sup>(a)</sup>, Thi Yen Nhi Pham <sup>(b)(c)</sup>, Dinh Hieu Truong <sup>(b)(c)</sup>, Thi Le Anh Nguyen <sup>(b)(c)</sup>, Sonia Taamalli <sup>(a)</sup>, Marc Ribaucour <sup>(a)</sup>, Abderrahman El Bakali <sup>(a)</sup>, Ivan Černušák <sup>(c)</sup>, Duy Quang Dao <sup>(b)(c),\*</sup>, Florent Louis <sup>(a)</sup>

<sup>(a)</sup>Univ. Lille, CNRS, UMR 8522, Physico-Chimie des Processus de Combustion et de l'Atmosphère – PC2A, 59000 Lille, France

<sup>(b)</sup>Institute of Research and Development, Duy Tan University, Da Nang, 550000, Vietnam

<sup>(c)</sup>School of Engineering and Technology, Duy Tan University, Da Nang 550000, Vietnam

<sup>(c)</sup>Department of Physical and Theoretical Chemistry, Faculty of Natural Sciences, Comenius University in Bratislava, Ilkovičova 6, 84215 Bratislava, Slovakia

\*Corresponding authors: [daoduyquang@duytan.edu.vn](mailto:daoduyquang@duytan.edu.vn) (D.Q.D.)

**List of supporting information**

**Figure S1:** (A) Optimized structure, (B) HOMO, (C) LUMO distributions and (D) electrostatic potential (ESP) maps of phosmet in gas phase.

**Figure S2:** (A) Optimized structure, (B) HOMO, (C) LUMO distributions and (D) electrostatic potential (ESP) maps of phosmet in aqueous phase.

**Figure S3:** Plot of Fukui function for radical attack ( $f^0$ ) describing the possible main reactive sites of phosmet calculating in the gas phase.

**Table S1.** Structural data for phosmet in the gas phase calculated at the M06-2X/6-31+G(d,p) level of theory.

**Table S2 – S23.** Optimized Cartesian coordinates for the stationary points involved in the H-abstraction and HO-addition pathways in gas phase calculated at the M06-2X/6-31+G(d,p) level of theory.

**Table S24 - S42.** Vibrational frequencies and rotational constants for the stationary points involved in the H-abstraction and HO-addition pathways in gas phase calculated at the M06-2X/6-31+G(d,p) level of theory.

**Table S43.** Rate constant and branching ratio ( $\Gamma$ , %) values in the gas phase calculated at the M06-2X/6-311++G(3df,3pd)/M06-2X/6-31+G(d,p) level of theory.

**Table S44.** Structural data for phosmet in the aqueous phase calculated at the M06-2X/6-31+G(d,p) level of theory.

**Table S45 – S66.** Optimized Cartesian coordinates for the stationary points involved in the H-abstraction and HO-addition pathways in the aqueous phase calculated at the M06-2X/6-31+G(d,p) level of theory.

**Table S67 - S88.** Vibrational frequencies and rotational constants for the stationary points involved in the H-abstraction and HO-addition pathways in aqueous phase calculated at the M06-2X/6-31+G(d,p) level of theory.

**Table S89.** Rate constants in aqueous phase calculated at the M06-2X/6-311++G(3df,3pd)//M06-2X/6-31+G(d,p) level of theory.

**Table S90.** Branching ratio ( $\Gamma$ , %) in aqueous phase calculated at the M06-2X/6-311++G(3df,3pd)//M06-2X/6-31+G(d,p) level of theory.

**Table S91:** Calculated standard enthalpies of reaction ( $\Delta_r H_{298K}$ ) and standard Gibbs energies of reaction ( $\Delta_r G_{298K}$ ), enthalpy of activation ( $\Delta H^\ddagger_{298K}$ ) and Gibbs energy of activation ( $\Delta G^\ddagger_{298K}$ ) at 298 K for FHT reactions in the gas phase using the M06-2X/6-311++G(3df,3pd)// M06-2X/6-31+G(d,p) level of theory.

**Table S92:** Relative standard reaction enthalpies at 0K for reactant complex (RC), transition states (TS), product complex (PC) and product (P) of FHT reactions in the gas phase using the M06-2X/6-311++G(3df,3pd)// M06-2X/6-31+G(d,p) level of theory.

**Table S93:** Calculated standard enthalpies of reaction ( $\Delta_r H_{298K}$ ) and standard Gibbs energies of reaction ( $\Delta_r G_{298K}$ ), enthalpy of activation ( $\Delta H^\ddagger_{298K}$ ) and Gibbs energy of activation ( $\Delta G^\ddagger_{298K}$ ) at 298 K for FHT reactions in the aqueous phase using the M06-2X/6-311++G(3df,3pd)// M06-2X/6-31+G(d,p) level of theory.

**Table S94:** Relative standard reaction enthalpies (in kJ/mol) at 0K for reactant complex (RC), transition states (TS), product complex (PC) and product (P) of FHT reactions in the aqueous phase using the M06-2X/6-311++G(3df,3pd)// M06-2X/6-31+G(d,p) level of theory.

**Table S95:** Relative standard reaction enthalpies at 0K for reactant complex (RC), transition states (TS), and product (P) of RAF reactions in the gas phase using the M06-2X/6-311++G(3df,3pd)// M06-2X/6-31+G(d,p) level of theory.

**Table S96:** Calculated standard enthalpies of reaction ( $\Delta_r H_{298K}$ ) and standard Gibbs energies of reaction ( $\Delta_r G_{298K}$ ), enthalpy of activation ( $\Delta H^\ddagger_{298K}$ ) and Gibbs energy of activation ( $\Delta G^\ddagger_{298K}$ ) at 298 K for RAF reactions in the gas phase using the M06-2X/6-311++G(3df,3pd)// M06-2X/6-31+G(d,p) level of theory.

**Table S97:** Calculated standard enthalpies of reaction ( $\Delta_r H_{298K}$ ) and standard Gibbs energies of reaction ( $\Delta_r G_{298K}$ ), enthalpy of activation ( $\Delta H^\ddagger_{298K}$ ) and Gibbs energy of activation ( $\Delta G^\ddagger_{298K}$ ) at 298 K for RAF reactions in the aqueous phase using the M06-2X/6-311++G(3df,3pd)// M06-2X/6-31+G(d,p) level of theory.

**Table S98:** Relative standard reaction enthalpies (in kJ/mol) at 0 K for reactant complex (RC), transition states (TS), product complex (PC) and product (P) of RAF reactions in the aqueous phase using the M06-2X/6-311++G(3df,3pd)// M06-2X/6-31+G(d,p) level of theory.

### Computational details

Kinetics for FHT and RAF reactions between the phosmet and HO radicals were studied using the pre-reactive complexes scheme proposed by Singleton and Cvetanovic [1]. Briefly, a two-step mechanism was considered:

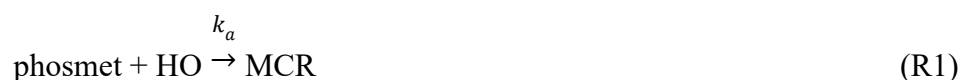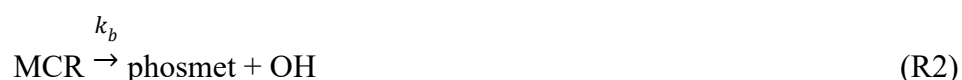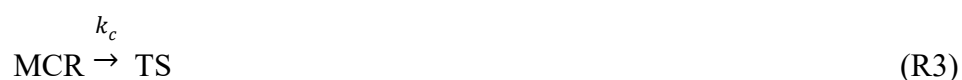

This scheme involved a fast pre-equilibrium between the reactants and the pre-reactive complex (MCR), leading to the hydrogen abstraction/radical addition followed by post-reactive complexes and products. The effective rate  $r$  applied to reactions (R1-R2) for steady-state conditions was defined as follows (eq.1):

$$r = r_c = k [\text{OH}] [\text{phosmet}] \quad (\text{eq.1})$$

where  $k$  was the total rate constant for each pathway, and it was calculated by the following equation (eq.2):

$$k = \frac{k_c k_a}{k_b + k_c} \quad (\text{eq.2})$$

The changes in entropy in the reverse reaction (R2) were much more significant than in the reaction (R3). Thus,  $k_b$  was expected to be larger than  $k_c$ , and  $k$  can be written as (eq.3):

$$k = \frac{k_c k_a}{k_b} = k_c K_{a,b} \quad (\text{eq.3})$$

where  $K_{a,b}$  was the equilibrium constant for the separated reactants versus the pre-reactive complex (MCR). The equilibrium constant ( $K_{a,b}$ ) of the first step was computed based on basic statistical thermodynamics principles, while  $k_c$  was calculated by conventional TST theory [2] (eq.4) (eq.5).

$$K_{a,b}(T) = \frac{Q_{MCR}(T)}{Q_{OH}(T)Q_{phosmet}(T)} \exp\left(\frac{E_{phosmet} + E_{OH} - E_{MCR}}{k_B T}\right) \quad (\text{eq.4})$$

$$k_c(T) = \kappa(T) \times \frac{k_B T}{h} \times \frac{Q_{TS}(T)}{Q_{MCR}(T)} \times \exp\left(-\frac{E_{TS} - E_{MCR}}{k_B T}\right) \quad (\text{eq.5})$$

where the terms  $Q_{OH}(T)$ ,  $Q_{PHOSMET}(T)$ ,  $Q_{MCR}(T)$ , and  $Q_{TS}(T)$  were the total partition functions of the reactants (HO and phosmet), MCR, and TS at the temperature T (K), respectively.  $E_{OH}$ ,  $E_{PHOSMET}$ ,  $E_{MCR}$ , and  $E_{TS}$  were the total potential energies at 0 K (including the zero-point energy corrections) of the HO radical, phosmet, MCR, and TS, respectively. The  $\kappa(T)$  was the transmission coefficient used for the tunneling correction estimated by the Eckart method [3] at the temperature T,  $k_B$  and  $h$  were the Boltzmann and Planck constants.

For the SET reaction, the reaction barrier was calculated by Marcus' theory [4–6] as follows (eq.6):

$$\Delta_r G_{SET}^\ddagger = \frac{\lambda}{4} \left(1 + \frac{\Delta_r G_{SET}^0}{\lambda}\right)^2 \quad (\text{eq.6})$$

where  $\Delta_r G_{SET}^0$  was the free energy of reaction calculated by Hess' law, the energy difference between reactants and products. The  $\lambda$  is the nuclear reorganization energy, which is calculated by the below equation (eq.7):

$$\lambda = \Delta H_{SET} - \Delta G_{SET}^0 \quad (\text{eq.7})$$

where the  $\Delta H_{SET}$  was the non-adiabatic energy between the reactants and vertical products.

In the aqueous phase, the apparent rate constant ( $k_{app}$ ) is typically including a diffusion limit, especially for the reaction with HO radical that has the rate constant close to the diffusion limit of the solution. The  $k_{app}$  was calculated based on the Collin-Kimball as follows (eq.8) [7]:

$$k_{app} = \frac{k_D k}{k_D + k} \quad (\text{eq.8})$$

where  $k$  was the thermal rate constant, and  $k_D$  was the steady-state Smoluchowski [8] rate constant for an irreversible bimolecular diffusion-controlled reaction (eq.9):

$$k_D = 4\pi R_{AB} D_{AB} N_A \quad (\text{eq.9})$$

where  $R_{AB}$  was reaction distance,  $N_A$  was the Avogadro number, and  $D_{AB}$  was the mutual diffusion coefficient of reactants, and it can be estimated from  $D_A$  and  $D_B$  according to Truhlar [9]. The  $D_A$  and  $D_B$  values were calculated from the Stokes-Einstein approach [10,11] (eq.10):

$$D_{A \text{ or } B} = \frac{k_B T}{6\pi\eta a_{A \text{ or } B}} \quad (\text{eq.10})$$

where  $k_B$  is the Boltzmann constant,  $T$  is the temperature,  $\eta$  denotes the solvent's viscosity varied as a function of temperature, and  $a$  is the radius of solute. The rate constants were calculated in a temperature range of 253 – 323 K with the GPOP program [12]. For all the reactions with HO radical, a spin-orbit correction (SOC) value being  $-0.833 \text{ kJ mol}^{-1}$  was applied [13–15].

## References

- [1] D.L. Singleton, R.J. Cvetanovic, Temperature dependence of the reaction of oxygen atoms with olefins, *J. Am. Chem. Soc.* 98 (1976) 6812–6819. <https://doi.org/10.1021/ja00438a006>.
- [2] M.G. Evans, M. Polanyi, Some applications of the transition state method to the calculation of reaction velocities, especially in solution, *Trans. Faraday Soc.* 31 (1935) 875–894. <https://doi.org/10.1039/TF9353100875>.

- [3] C. Eckart, The Penetration of a Potential Barrier by Electrons, *Phys. Rev.* 35 (1930) 1303–1309. <https://doi.org/10.1103/PhysRev.35.1303>.
- [4] R.A. Marcus, On the Theory of Oxidation-Reduction Reactions Involving Electron Transfer. I, *J. Chem. Phys.* 24 (1956) 966–978. <https://doi.org/10.1063/1.1742723>.
- [5] R.A. Marcus, On the Theory of Oxidation-Reduction Reactions Involving Electron Transfer. II. Applications to Data on the Rates of Isotopic Exchange Reactions, *J. Chem. Phys.* 26 (1957) 867–871. <https://doi.org/10.1063/1.1743423>.
- [6] R.A. Marcus, On the Theory of Oxidation-Reduction Reactions Involving Electron Transfer. III. Applications to Data on the Rates of Organic Redox Reactions, *J. Chem. Phys.* 26 (1957) 872–877. <https://doi.org/10.1063/1.1743424>.
- [7] F.C. Collins, G.E. Kimball, Diffusion-controlled reaction rates, *J. Colloid Sci.* 4 (1949) 425–437. [https://doi.org/10.1016/0095-8522\(49\)90023-9](https://doi.org/10.1016/0095-8522(49)90023-9).
- [8] M. V. Smoluchowski, Versuch einer mathematischen Theorie der Koagulationskinetik kolloider Lösungen, *Zeitschrift Für Phys. Chemie.* 92 (1918) 129. <https://doi.org/10.1515/zpch-1918-9209>.
- [9] D.G. Truhlar, Nearly encounter-controlled reactions: The equivalence of the steady-state and diffusional viewpoints, *J. Chem. Educ.* 62 (1985) 104. <https://doi.org/10.1021/ed062p104>.
- [10] A. Einstein, Zur Elektrodynamik bewegter Körper, *Ann. Phys.* 322 (1905) 891–921. <https://doi.org/10.1002/andp.19053221004>.
- [11] G.G. Stokes, *Mathematical and Physical Papers*, Cambridge University Press, 1905.
- [12] A. Miyoshi, GPOP software, rev. 2022.01.20m1, available from the author. See <http://akrmys.com/gpop/>, (2022). <http://akrmys.com/gpop/>.
- [13] M. Šulka, K. Šulková, F. Louis, P. Neogrady, I. Černušák, A Theoretical Study of the X-Abstraction Reactions (X = H, Br, or I) from CH<sub>2</sub>I<sub>2</sub> by OH Radicals: Implications for Atmospheric Chemistry, *Zeitschrift Für Phys. Chemie.* 227 (2013) 1337–1359. <https://doi.org/doi:10.1524/zpch.2013.0391>.
- [14] K.P. Huber, G. Herzberg, *Molecular Spectra and Molecular Structure. IV. Constants of Diatomic Molecules*, Springer US, Boston, MA, 1979. <https://doi.org/10.1007/978-1-4757-0961-2>.
- [15] R. Samzow, B.A. Hess, Spin—orbit effects in the Br atom in the framework of the no-pair theory, *Chem. Phys. Lett.* 184 (1991) 491–496. [https://doi.org/10.1016/0009-2614\(91\)80024-R](https://doi.org/10.1016/0009-2614(91)80024-R).

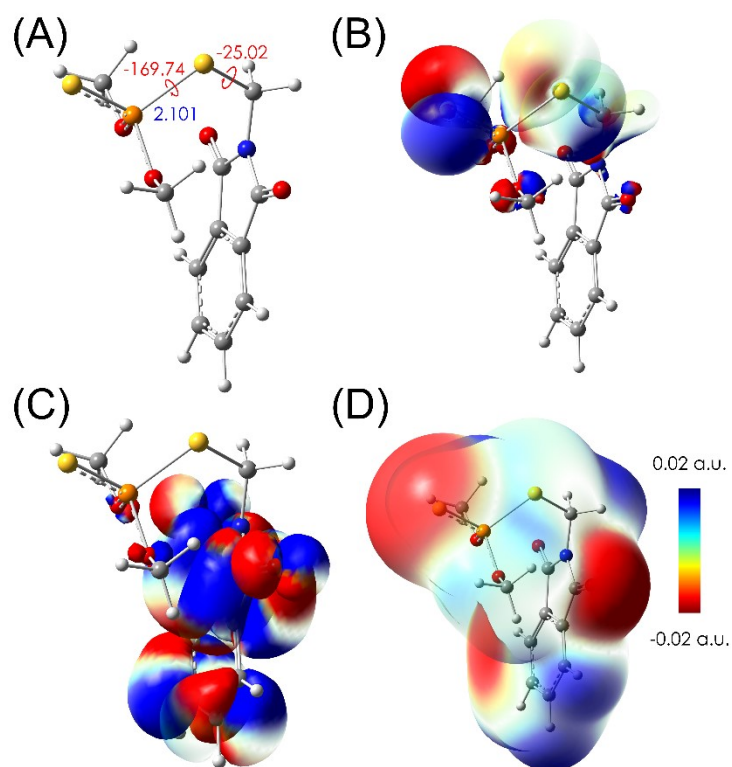

**Figure S1:** (A) Optimized structure, (B) HOMO, (C) LUMO distributions and (D) electrostatic potential (ESP) maps of phosmet in gas phase (Red represents regions of high negative potential and blue represents regions of high positive potential).

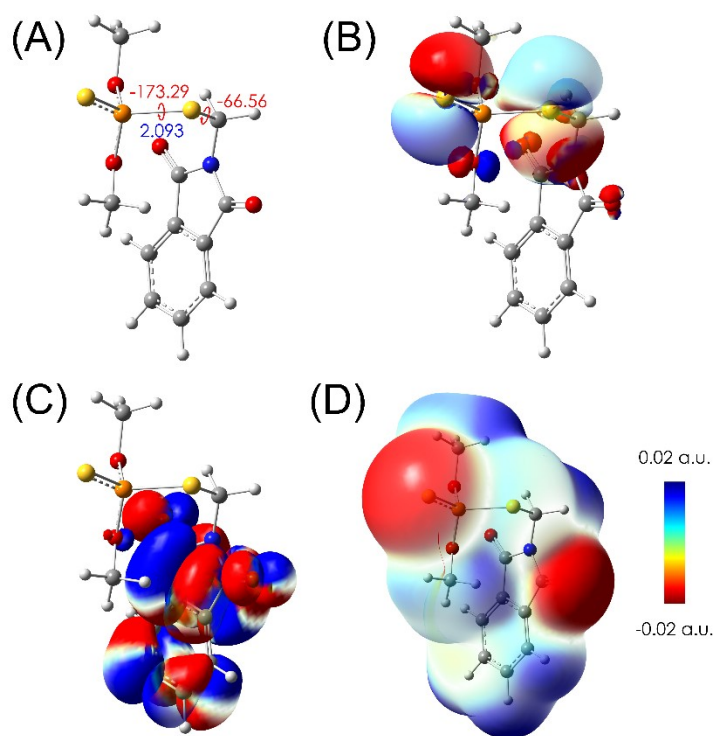

**Figure S2:** (A) Optimized structure, (B) HOMO, (C) LUMO distributions and (D) electrostatic potential (ESP) maps of phosmet in aqueous phase (Red represents regions of high negative potential and blue represents regions of high positive potential).

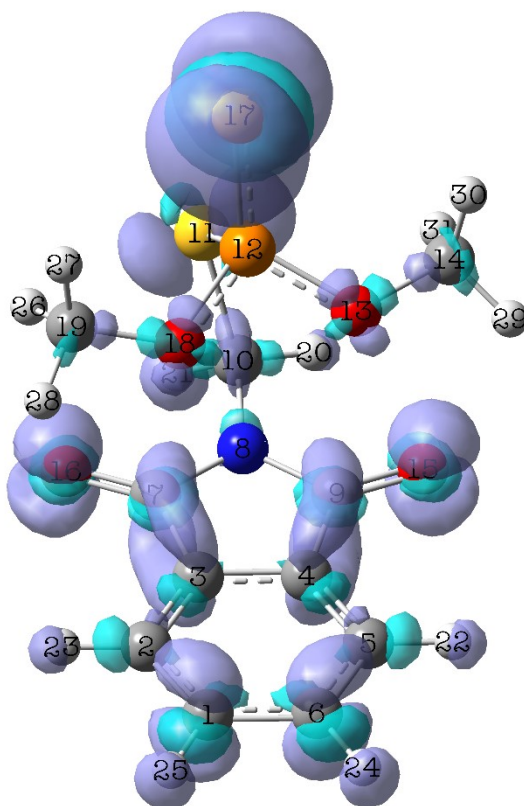

**Figure S3:** Plot of Fukui function for radical attack ( $f^0$ ) describing the possible main reactive sites of phosmet calculating in the gas phase.



## GAS PHASE DATA

**Table S1.** Structural data for phosmet in the gas phase calculated at the M06-2X/6-31+G(d,p) level of theory.

| Phosmet                                                                                                                                                                                                                                                                                                                                                                                                                                                                                                                                                                                                                                                                                                                                                                                                                                                                                                                                                                                                                                                                       |                                                                                                                                                                                                                                                                                                                                                                                                                                                                                                         |
|-------------------------------------------------------------------------------------------------------------------------------------------------------------------------------------------------------------------------------------------------------------------------------------------------------------------------------------------------------------------------------------------------------------------------------------------------------------------------------------------------------------------------------------------------------------------------------------------------------------------------------------------------------------------------------------------------------------------------------------------------------------------------------------------------------------------------------------------------------------------------------------------------------------------------------------------------------------------------------------------------------------------------------------------------------------------------------|---------------------------------------------------------------------------------------------------------------------------------------------------------------------------------------------------------------------------------------------------------------------------------------------------------------------------------------------------------------------------------------------------------------------------------------------------------------------------------------------------------|
| $C_1 - ^2A$                                                                                                                                                                                                                                                                                                                                                                                                                                                                                                                                                                                                                                                                                                                                                                                                                                                                                                                                                                                                                                                                   |                                                                                                                                                                                                                                                                                                                                                                                                                                                                                                         |
| 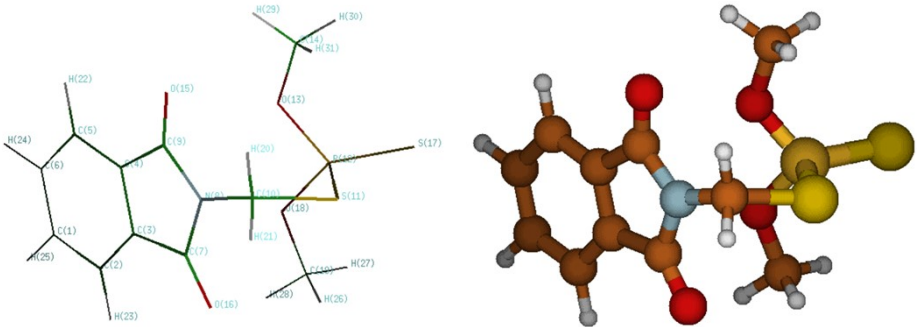                                                                                                                                                                                                                                                                                                                                                                                                                                                                                                                                                                                                                                                                                                                                                                                                                                                                                                                                                                                            |                                                                                                                                                                                                                                                                                                                                                                                                                                                                                                         |
| Optimized Cartesian coordinates                                                                                                                                                                                                                                                                                                                                                                                                                                                                                                                                                                                                                                                                                                                                                                                                                                                                                                                                                                                                                                               | Vibrational frequencies (cm <sup>-1</sup> )                                                                                                                                                                                                                                                                                                                                                                                                                                                             |
| C -4.143882 -1.013395 -1.048365<br>C -3.205108 -1.485173 -0.124486<br>C -2.275184 -0.576946 0.349175<br>C -2.271695 0.750973 -0.066236<br>C -3.197958 1.230887 -0.975241<br>C -4.140158 0.321022 -1.466349<br>C -1.157234 -0.767774 1.318460<br>N -0.537750 0.484337 1.429650<br>C -1.157982 1.459249 0.629221<br>C 0.649391 0.725226 2.186696<br>S 2.225105 0.001523 1.503952<br>P 1.872560 -0.180834 -0.559048<br>O 1.060495 1.128869 -0.997169<br>C 1.732697 2.395172 -1.050364<br>O -0.837271 2.621741 0.579283<br>O -0.819203 -1.758887 1.919563<br>S 3.510986 -0.615060 -1.468410<br>O 0.635396 -1.193298 -0.721938<br>C 0.852623 -2.597685 -0.515145<br>H 0.772090 1.805686 2.265290<br>H 0.555383 0.273638 3.175952<br>H -3.185236 2.268901 -1.290492<br>H -3.200646 -2.516997 0.211716<br>H -4.882383 0.654035 -2.184470<br>H -4.889692 -1.692583 -1.448431<br>H 1.180215 -2.778583 0.512409<br>H 1.589766 -2.968861 -1.230521<br>H -0.114459 -3.071830 -0.678437<br>H 0.962245 3.127317 -1.284047<br>H 2.504497 2.371843 -1.823059<br>H 2.178207 2.629431 -0.078539 | 14, 38, 83, 89, 94, 112, 133, 144, 155, 166, 171, 186, 197, 199, 227, 239, 263, 282, 319,<br>356, 390, 404, 414, 432, 467, 490, 539, 548, 620, 669, 677, 683, 707, 732, 733, 793,<br>806, 831, 844, 868, 920, 936, 994, 1025, 1029, 1048, 1093, 1106, 1127, 1144, 1180,<br>1186, 1189, 1201, 1209, 1214, 1242, 1310, 1325, 1356, 1396, 1447, 1468, 1481, 1485,<br>1499, 1500, 1505, 1506, 1516, 1517, 1692, 1697, 1851, 1908, 3077, 3082, 3119, 3160,<br>3170, 3192, 3196, 3210, 3221, 3232, 3241, 3246 |
|                                                                                                                                                                                                                                                                                                                                                                                                                                                                                                                                                                                                                                                                                                                                                                                                                                                                                                                                                                                                                                                                               | Rotational constants (GHz)                                                                                                                                                                                                                                                                                                                                                                                                                                                                              |
|                                                                                                                                                                                                                                                                                                                                                                                                                                                                                                                                                                                                                                                                                                                                                                                                                                                                                                                                                                                                                                                                               | 0.50843, 0.23933, 0.22925                                                                                                                                                                                                                                                                                                                                                                                                                                                                               |

**Table S2.** Optimized Cartesian coordinates for the stationary points involved in the H2O-abstraction pathway in gas phase calculated at the M06-2X/6-31+G(d,p) level of theory.

| MCR(H2O-abs)                                                                      |           |           |           | TS(H2O-abs)                                                                        |           |           |           | MCP(H2O-abs)                                                                        |           |           |           | Rad(H2O-abs)                                                                        |           |           |           |
|-----------------------------------------------------------------------------------|-----------|-----------|-----------|------------------------------------------------------------------------------------|-----------|-----------|-----------|-------------------------------------------------------------------------------------|-----------|-----------|-----------|-------------------------------------------------------------------------------------|-----------|-----------|-----------|
| 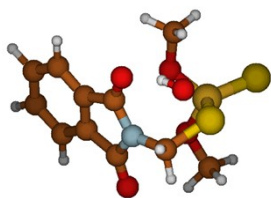 |           |           |           |  |           |           |           |  |           |           |           |  |           |           |           |
| C                                                                                 | -4.375997 | -1.069946 | -0.725254 | C                                                                                  | -4.218065 | -1.630499 | -0.016762 | C                                                                                   | 4.401702  | -1.405346 | 0.364636  | C                                                                                   | 4.351474  | 0.152965  | -1.330503 |
| C                                                                                 | -3.445684 | -1.436685 | 0.253390  | C                                                                                  | -3.276953 | -1.364557 | 0.983527  | C                                                                                   | 3.476985  | -1.420495 | -0.685250 | C                                                                                   | 3.434375  | 1.128435  | -0.926068 |
| C                                                                                 | -2.413969 | -0.550003 | 0.504704  | C                                                                                  | -2.313600 | -0.411357 | 0.704795  | C                                                                                   | 2.435115  | -0.512065 | -0.620498 | C                                                                                   | 2.416347  | 0.724477  | -0.079509 |
| C                                                                                 | -2.304140 | 0.656344  | -0.178714 | C                                                                                  | -2.280748 | 0.260350  | -0.513311 | C                                                                                   | 2.309084  | 0.380557  | 0.438395  | C                                                                                   | 2.304641  | -0.591998 | 0.354083  |
| C                                                                                 | -3.219688 | 1.033706  | -1.144676 | C                                                                                  | -3.209783 | 0.012046  | -1.507910 | C                                                                                   | 3.220736  | 0.411466  | 1.478657  | C                                                                                   | 3.209100  | -1.565042 | -0.033925 |
| C                                                                                 | -4.265386 | 0.143199  | -1.411700 | C                                                                                  | -4.185225 | -0.954490 | -1.240470 | C                                                                                   | 4.276280  | -0.505336 | 1.427455  | C                                                                                   | 4.241114  | -1.170503 | -0.891687 |
| C                                                                                 | -1.281979 | -0.643707 | 1.469913  | C                                                                                  | -1.191637 | 0.088812  | 1.549078  | C                                                                                   | 1.300603  | -0.287821 | -1.559967 | C                                                                                   | 1.297192  | 1.510900  | 0.508514  |
| N                                                                                 | -0.538502 | 0.545368  | 1.297445  | N                                                                                  | -0.524618 | 1.049080  | 0.754725  | N                                                                                   | 0.542857  | 0.774892  | -0.998840 | N                                                                                   | 0.560402  | 0.596914  | 1.302252  |
| C                                                                                 | -1.093847 | 1.366404  | 0.320293  | C                                                                                  | -1.134971 | 1.211044  | -0.492905 | C                                                                                   | 1.101706  | 1.220075  | 0.209220  | C                                                                                   | 1.117196  | -0.703843 | 1.248197  |
| C                                                                                 | 0.714260  | 0.775648  | 1.957941  | C                                                                                  | 0.669167  | 1.701046  | 1.158246  | C                                                                                   | -0.682637 | 1.176352  | -1.524103 | C                                                                                   | -0.633361 | 0.951279  | 1.915441  |
| S                                                                                 | 2.219946  | 0.778864  | 0.871370  | S                                                                                  | 2.215713  | 1.241752  | 0.276811  | S                                                                                   | -2.145640 | 1.138498  | -0.577038 | S                                                                                   | -2.116351 | 0.082013  | 1.608484  |
| P                                                                                 | 1.748074  | -0.644729 | -0.605628 | P                                                                                  | 1.869022  | -0.753312 | -0.310339 | P                                                                                   | -1.907221 | -0.728816 | 0.425954  | P                                                                                   | -1.979308 | -0.192834 | -0.507247 |
| O                                                                                 | 0.511156  | -0.028114 | -1.430506 | O                                                                                  | 0.631705  | -0.711924 | -1.335161 | O                                                                                   | -0.684020 | -0.508290 | 1.446296  | O                                                                                   | -0.784063 | -1.241274 | -0.725104 |
| C                                                                                 | 0.767400  | 1.018101  | -2.379744 | C                                                                                  | 0.853230  | -0.238648 | -2.673075 | C                                                                                   | -0.915943 | 0.222864  | 2.659218  | C                                                                                   | -1.018145 | -2.629262 | -0.437959 |
| O                                                                                 | -0.655330 | 2.443907  | -0.026786 | O                                                                                  | -0.776697 | 1.997728  | -1.341824 | O                                                                                   | 0.676071  | 2.128397  | 0.889014  | O                                                                                   | 0.700323  | -1.666885 | 1.838968  |
| O                                                                                 | -1.025621 | -1.505146 | 2.272594  | O                                                                                  | -0.882498 | -0.206646 | 2.675108  | O                                                                                   | 1.029792  | -0.851066 | -2.588574 | O                                                                                   | 1.022748  | 2.676954  | 0.374651  |
| S                                                                                 | 3.316968  | -1.148616 | -1.593614 | S                                                                                  | 3.507833  | -1.557098 | -0.912108 | S                                                                                   | -3.576473 | -1.351926 | 1.148241  | S                                                                                   | -3.695858 | -0.608303 | -1.266126 |
| O                                                                                 | 0.889201  | -1.773529 | 0.140676  | O                                                                                  | 1.055806  | -1.430903 | 0.891705  | O                                                                                   | -1.087571 | -1.646954 | -0.598766 | O                                                                                   | -1.165206 | 1.085396  | -1.024772 |
| C                                                                                 | 1.545439  | -2.698927 | 1.019186  | C                                                                                  | 1.731234  | -1.738472 | 2.120528  | C                                                                                   | -1.731629 | -2.147410 | -1.779627 | C                                                                                   | -1.803111 | 2.370107  | -1.067750 |
| H                                                                                 | 0.734950  | 1.764739  | 2.420910  | H                                                                                  | 0.566916  | 2.860940  | 0.951811  | H                                                                                   | -0.302260 | 3.553209  | -0.109660 | H                                                                                   | -0.695300 | 1.976833  | 2.257731  |
| H                                                                                 | 0.818653  | -0.003943 | 2.713285  | H                                                                                  | 0.786008  | 1.577680  | 2.236050  | H                                                                                   | -0.750534 | 1.275372  | -2.598409 | H                                                                                   | 3.114080  | -2.587401 | 0.317209  |
| H                                                                                 | -3.125826 | 1.980636  | -1.666402 | H                                                                                  | -3.177419 | 0.547954  | -2.450929 | H                                                                                   | 3.114365  | 1.118725  | 2.294710  | H                                                                                   | 3.509262  | 2.158673  | -1.257687 |
| H                                                                                 | -3.521393 | -2.374604 | 0.793289  | H                                                                                  | -3.293851 | -1.879881 | 1.938023  | H                                                                                   | 3.564503  | -2.112162 | -1.516429 | H                                                                                   | 4.970782  | -1.902004 | -1.223458 |
| H                                                                                 | -5.005658 | 0.396824  | -2.163441 | H                                                                                  | -4.931776 | -1.184321 | -1.993639 | H                                                                                   | 5.012487  | -0.519648 | 2.224489  | H                                                                                   | 5.164152  | 0.425246  | -1.995984 |
| H                                                                                 | -5.199466 | -1.737355 | -0.957281 | H                                                                                  | -4.989187 | -2.373573 | 0.158045  | H                                                                                   | 5.232557  | -2.103240 | 0.355670  | H                                                                                   | -2.153069 | 2.652930  | -0.070207 |
| H                                                                                 | 2.124927  | -2.161252 | 1.776712  | H                                                                                  | 2.189802  | -0.836620 | 2.537970  | H                                                                                   | -2.082518 | -1.316779 | -2.399460 | H                                                                                   | -2.640142 | 2.346390  | -1.769330 |
| H                                                                                 | 2.202903  | -3.352903 | 0.442258  | H                                                                                  | 2.493384  | -2.500273 | 1.942619  | H                                                                                   | -2.567331 | -2.793856 | -1.501611 | H                                                                                   | -1.034863 | 3.067915  | -1.395155 |
| H                                                                                 | 0.748118  | -3.263610 | 1.498859  | H                                                                                  | 0.959980  | -2.102629 | 2.796360  | H                                                                                   | -0.966721 | -2.704246 | -2.317340 | H                                                                                   | -0.078106 | -3.136204 | -0.651155 |
| H                                                                                 | -0.208020 | 1.310252  | -2.767336 | H                                                                                  | -0.111740 | -0.309178 | -3.173612 | H                                                                                   | 0.043187  | 0.250222  | 3.175016  | H                                                                                   | -1.816284 | -3.010997 | -1.078533 |
| H                                                                                 | 1.405463  | 0.643007  | -3.182637 | H                                                                                  | 1.592799  | -0.868192 | -3.172445 | H                                                                                   | -1.664948 | -0.290732 | 3.265947  | H                                                                                   | -1.269720 | -2.755228 | 0.618825  |
| H                                                                                 | 1.237030  | 1.872896  | -1.883475 | H                                                                                  | 1.180821  | 0.804568  | -2.651486 | H                                                                                   | -1.236133 | 1.242882  | 2.427608  |                                                                                     |           |           |           |
| O                                                                                 | 1.783604  | 3.585550  | 1.028822  | O                                                                                  | 0.242456  | 4.085815  | 0.417677  | O                                                                                   | -0.631512 | 4.069724  | -0.860286 |                                                                                     |           |           |           |
| H                                                                                 | 0.963551  | 3.348538  | 0.543022  | H                                                                                  | -0.027540 | 3.780978  | -0.472473 | H                                                                                   | -0.608607 | 4.991562  | -0.587550 |                                                                                     |           |           |           |

**Table S3.** Optimized Cartesian coordinates for the stationary points involved in the H21-abstraction pathway in gas phase calculated at the M06-2X/6-31+G(d,p) level of theory.

| MCR(H21-abs)                                                                                                                                                                                                                                                                                                                                                                                                                                                                                                                                                                                                                                                                                                                                                                                                                                                                                                                                                                                                                                                                                                                                   | TS(H21-abs)                                                                                                                                                                                                                                                                                                                                                                                                                                                                                                                                                                                                                                                                                                                                                                                                                                                                                                                                                                                                                                                                                                                                      | MCP(H21-abs)                                                                                                                                                                                                                                                                                                                                                                                                                                                                                                                                                                                                                                                                                                                                                                                                                                                                                                                                                                                                                                                                                                                                    | Rad(H21-abs)                                                                                                                                                                                                                                                                                                                                                                                                                                                                                                                                                                                                                                                                                                                                                                                                                                                                                                                                                                                                                                 |
|------------------------------------------------------------------------------------------------------------------------------------------------------------------------------------------------------------------------------------------------------------------------------------------------------------------------------------------------------------------------------------------------------------------------------------------------------------------------------------------------------------------------------------------------------------------------------------------------------------------------------------------------------------------------------------------------------------------------------------------------------------------------------------------------------------------------------------------------------------------------------------------------------------------------------------------------------------------------------------------------------------------------------------------------------------------------------------------------------------------------------------------------|--------------------------------------------------------------------------------------------------------------------------------------------------------------------------------------------------------------------------------------------------------------------------------------------------------------------------------------------------------------------------------------------------------------------------------------------------------------------------------------------------------------------------------------------------------------------------------------------------------------------------------------------------------------------------------------------------------------------------------------------------------------------------------------------------------------------------------------------------------------------------------------------------------------------------------------------------------------------------------------------------------------------------------------------------------------------------------------------------------------------------------------------------|-------------------------------------------------------------------------------------------------------------------------------------------------------------------------------------------------------------------------------------------------------------------------------------------------------------------------------------------------------------------------------------------------------------------------------------------------------------------------------------------------------------------------------------------------------------------------------------------------------------------------------------------------------------------------------------------------------------------------------------------------------------------------------------------------------------------------------------------------------------------------------------------------------------------------------------------------------------------------------------------------------------------------------------------------------------------------------------------------------------------------------------------------|----------------------------------------------------------------------------------------------------------------------------------------------------------------------------------------------------------------------------------------------------------------------------------------------------------------------------------------------------------------------------------------------------------------------------------------------------------------------------------------------------------------------------------------------------------------------------------------------------------------------------------------------------------------------------------------------------------------------------------------------------------------------------------------------------------------------------------------------------------------------------------------------------------------------------------------------------------------------------------------------------------------------------------------------|
|                                                                                                                                                                                                                                                                                                                                                                                                                                                                                                                                                                                                                                                                                                                                                                                                                                                                                                                                                                                                                                                               |                                                                                                                                                                                                                                                                                                                                                                                                                                                                                                                                                                                                                                                                                                                                                                                                                                                                                                                                                                                                                                                                |                                                                                                                                                                                                                                                                                                                                                                                                                                                                                                                                                                                                                                                                                                                                                                                                                                                                                                                                                                                                                                                              |                                                                                                                                                                                                                                                                                                                                                                                                                                                                                                                                                                                                                                                                                                                                                                                                                                                                                                                                                           |
| C -4.265275 0.142987 1.411758<br>C -3.219610 1.033547 1.144793<br>C -2.304086 0.656303 0.178761<br>C -2.413910 -0.549971 -0.504779<br>C -3.445598 -1.436706 -0.253526<br>C -4.375884 -1.070089 0.725186<br>C -1.093826 1.366457 -0.320209<br>N -0.538461 0.545537 -1.297418<br>C -1.281938 -0.643551 -1.470013<br>C 0.714301 0.775835 -1.957887<br>S 2.219960 0.778980 -0.871266<br>P 1.748065 -0.644750 0.605574<br>O 0.889170 -1.773457 -0.140858<br>C 1.545414 -2.698824 -1.019387<br>O -1.025569 -1.504878 -2.272804<br>O -0.655424 2.443988 0.026946<br>S 3.316934 -1.148735 1.593550<br>O 0.511108 -0.028240 1.430473<br>C 0.767300 1.017772 2.379937<br>H 0.818707 -0.003721 -2.713265<br>H 0.735026 1.764951 -2.420804<br>H -3.521309 -2.374565 -0.793528<br>H -3.125751 1.980429 1.666607<br>H -5.199332 -1.737539 0.957173<br>H -5.005528 0.396512 2.163552<br>H 1.236788 1.872734 1.883818<br>H 1.405468 0.642568 3.182693<br>H -0.208130 1.309719 2.767659<br>H 0.748080 -3.263319 -1.499264<br>H 2.202688 -3.352976 -0.442445<br>H 2.125105 -2.161128 -1.776745<br>O 1.783385 3.585573 -1.028610<br>H 0.963437 3.348453 -0.542672 | C 4.185096 -0.954349 -1.240567<br>C 3.209655 0.012203 -1.507956<br>C 2.280674 0.260522 -0.513312<br>C 2.313594 -0.411169 0.704803<br>C 3.276954 -1.364374 0.983490<br>C 4.217997 -1.630349 -0.016857<br>C 1.134872 1.211190 -0.492866<br>N 0.524634 1.049284 0.754831<br>C 1.191679 0.089006 1.549147<br>C -0.669258 1.701071 1.158324<br>S -2.215758 1.241552 0.276934<br>P -1.868850 -0.753437 -0.310310<br>O -1.055466 -1.431009 0.891630<br>C -1.730729 -1.738745 2.120497<br>O 0.882582 -0.206456 2.675187<br>O 0.776486 1.997803 -1.341801<br>S -3.507608 -1.557369 -0.912026<br>O -0.631597 -0.711826 -1.335190<br>C -0.853310 -0.238785 -2.673150<br>H -0.786068 1.577690 2.236127<br>H -0.567163 2.860937 0.951728<br>H 3.293905 -1.879681 1.937996<br>H 3.177244 -0.548101 -2.450980<br>H 4.989113 -2.373439 0.157909<br>H 4.931597 -1.184202 -1.993779<br>H -1.181290 0.804310 -2.651676<br>H -1.592648 -0.868659 -3.172443<br>H 0.111683 -0.309005 -3.173681<br>H -0.959473 -2.103545 2.795980<br>H -2.493295 -2.500107 1.942498<br>H -2.188721 -0.836827 2.538420<br>O -0.243376 4.085944 0.417371<br>H 0.026903 3.781092 -0.472689 | C 4.276373 -0.505141 -1.427570<br>C 3.220778 0.411607 -1.478640<br>C 2.309137 0.380506 -0.438371<br>C 2.435243 -0.512261 0.620387<br>C 3.477166 -1.420640 0.685018<br>C 4.401868 -1.405293 -0.364876<br>C 1.101755 1.219964 -0.209006<br>N 0.542962 0.774583 0.999013<br>C 1.300765 -0.288187 1.559942<br>C -0.682472 1.175955 1.524425<br>S -2.145443 1.138659 0.577209<br>P -1.907360 -0.728506 -0.426001<br>O -1.087783 -1.646803 0.598659<br>C -1.732285 -2.148054 1.778936<br>O 1.030043 -0.851580 2.588495<br>O 0.676032 2.128370 -0.888627<br>S -3.576784 -1.351303 -1.148201<br>O -0.684158 -0.508122 -1.446375<br>C -0.916034 0.222892 -2.659382<br>H -0.750467 1.273817 2.598832<br>H -0.301584 3.552973 0.110323<br>H 3.564711 -2.112403 1.516113<br>H 3.114368 1.118965 -2.294601<br>H 5.232773 -2.103129 -0.356028<br>H 5.012571 -0.519297 -2.224615<br>H -1.236219 1.242947 -2.427910<br>H -1.665041 -0.290752 -3.266065<br>H 0.043108 0.250168 -3.175160<br>H -0.966668 -2.702312 2.318310<br>H -2.565768 -2.796987 1.500095<br>H -2.086557 -1.317931 2.397551<br>O -0.631081 4.069663 0.860723<br>H -0.608105 4.991438 0.587782 | C -4.241113 -1.170505 -0.891682<br>C -3.209100 -1.565042 -0.033918<br>C -2.304641 -0.591997 0.354087<br>C -2.416345 0.724477 -0.079511<br>C -3.434372 1.128432 -0.926072<br>C -4.351472 0.152961 -1.330504<br>C -1.117195 -0.703839 1.248201<br>N -0.560399 0.596917 1.302250<br>C -1.297189 1.510901 0.508511<br>C 0.633362 0.951283 1.915441<br>S 2.116355 0.082019 1.608481<br>P 1.979307 -0.192835 -0.507247<br>O 1.165207 1.085393 -1.024779<br>C 1.803103 2.370109 -1.067748<br>O -1.022743 2.676954 0.374640<br>O -0.700323 -1.666879 1.838977<br>S 3.695855 -0.608314 -1.266127<br>O 0.784059 -1.241273 -0.725097<br>C 1.018140 -2.629262 -0.437958<br>H 0.695301 1.976839 2.257727<br>H -3.509258 2.158669 -1.257696<br>H -3.114081 -2.587400 0.317221<br>H -5.164149 0.425240 -1.995987<br>H -4.970782 -1.902006 -1.223451<br>H 1.269712 -2.755233 0.618827<br>H 1.816278 -3.010995 -1.078532<br>H 0.078101 -3.136203 -0.651158<br>H 1.034866 3.067904 -1.395204<br>H 2.640171 2.346387 -1.769285<br>H 2.153006 2.652952 -0.070191 |

**Table S4.** Optimized Cartesian coordinates for the stationary points involved in the H22-abstraction pathway in gas phase calculated at the M06-2X/6-31+G(d,p) level of theory.

| MCR(H22-abs)                                                                                                                                                                                                                                                                                                                                                                                                                                                                                                                                                                                                                                                                                                                                                                                                                                                                                                                                                                                                                                                                                                                                      | TS(H22-abs)                                                                                                                                                                                                                                                                                                                                                                                                                                                                                                                                                                                                                                                                                                                                                                                                                                                                                                                                                                                                                                                                                                                                       | MCP(H22-abs)                                                                                                                                                                                                                                                                                                                                                                                                                                                                                                                                                                                                                                                                                                                                                                                                                                                                                                                                                                                                                                                                                                                                      | Rad(H22-abs)                                                                                                                                                                                                                                                                                                                                                                                                                                                                                                                                                                                                                                                                                                                                                                                                                                                                                                                                                                                                                                |
|---------------------------------------------------------------------------------------------------------------------------------------------------------------------------------------------------------------------------------------------------------------------------------------------------------------------------------------------------------------------------------------------------------------------------------------------------------------------------------------------------------------------------------------------------------------------------------------------------------------------------------------------------------------------------------------------------------------------------------------------------------------------------------------------------------------------------------------------------------------------------------------------------------------------------------------------------------------------------------------------------------------------------------------------------------------------------------------------------------------------------------------------------|---------------------------------------------------------------------------------------------------------------------------------------------------------------------------------------------------------------------------------------------------------------------------------------------------------------------------------------------------------------------------------------------------------------------------------------------------------------------------------------------------------------------------------------------------------------------------------------------------------------------------------------------------------------------------------------------------------------------------------------------------------------------------------------------------------------------------------------------------------------------------------------------------------------------------------------------------------------------------------------------------------------------------------------------------------------------------------------------------------------------------------------------------|---------------------------------------------------------------------------------------------------------------------------------------------------------------------------------------------------------------------------------------------------------------------------------------------------------------------------------------------------------------------------------------------------------------------------------------------------------------------------------------------------------------------------------------------------------------------------------------------------------------------------------------------------------------------------------------------------------------------------------------------------------------------------------------------------------------------------------------------------------------------------------------------------------------------------------------------------------------------------------------------------------------------------------------------------------------------------------------------------------------------------------------------------|---------------------------------------------------------------------------------------------------------------------------------------------------------------------------------------------------------------------------------------------------------------------------------------------------------------------------------------------------------------------------------------------------------------------------------------------------------------------------------------------------------------------------------------------------------------------------------------------------------------------------------------------------------------------------------------------------------------------------------------------------------------------------------------------------------------------------------------------------------------------------------------------------------------------------------------------------------------------------------------------------------------------------------------------|
| 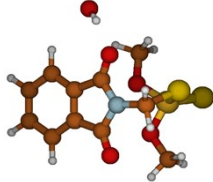                                                                                                                                                                                                                                                                                                                                                                                                                                                                                                                                                                                                                                                                                                                                                                                                                                                                                                                                                                                                                                                                 |                                                                                                                                                                                                                                                                                                                                                                                                                                                                                                                                                                                                                                                                                                                                                                                                                                                                                                                                                                                                                                                                  |                                                                                                                                                                                                                                                                                                                                                                                                                                                                                                                                                                                                                                                                                                                                                                                                                                                                                                                                                                                                                                                                |                                                                                                                                                                                                                                                                                                                                                                                                                                                                                                                                                                                                                                                                                                                                                                                                                                                                                                                                                          |
| C -3.908127 -1.209899 -1.469466<br>C -2.892579 -1.940477 -0.842345<br>C -2.053074 -1.246928 0.009867<br>C -2.209850 0.117106 0.243938<br>C -3.208698 0.852744 -0.371077<br>C -4.060998 0.160114 -1.239434<br>C -0.885281 -1.730112 0.799745<br>N -0.397505 -0.592189 1.478407<br>C -1.147780 0.543662 1.198069<br>C 0.818144 -0.587511 2.235160<br>S 2.244920 0.335790 1.481110<br>P 1.934898 0.134922 -0.589430<br>O 0.554885 0.892793 -0.913791<br>C 0.535771 2.327398 -0.983247<br>O -0.928962 1.635968 1.684198<br>O -0.428253 -2.840459 0.902953<br>S 3.504514 0.674954 -1.557446<br>O 1.349494 -1.342482 -0.797284<br>C 2.216170 -2.476771 -0.655599<br>H 0.660896 -0.095324 3.196792<br>H 1.106108 -1.628899 2.382264<br>H -3.313156 1.919896 -0.198291<br>H -2.758987 -3.002968 -1.016155<br>H -4.854798 0.698307 -1.747001<br>H -4.587139 -1.713005 -2.150129<br>H 2.718313 -2.453999 0.316967<br>H 2.956803 -2.477982 -1.458281<br>H 1.568775 -3.349774 -0.714165<br>H -0.492366 2.599022 -1.228840<br>H 1.215341 2.672974 -1.765070<br>H 0.815120 2.754573 -0.015197<br>O -1.908234 3.894077 0.318743<br>H -1.600358 3.251626 0.998873 | C -3.793764 -1.250669 -1.520455<br>C -2.761085 -1.975256 -0.912207<br>C -1.945803 -1.298764 -0.022637<br>C -2.146968 0.048982 0.265988<br>C -3.160555 0.753246 -0.338266<br>C -3.996158 0.108191 -1.245264<br>C -0.758124 -1.763088 0.754239<br>N -0.314393 -0.633358 1.475252<br>C -1.106915 0.485792 1.237791<br>C 0.905748 -0.610229 2.225118<br>S 2.289667 0.394418 1.495697<br>P 1.965844 0.267343 -0.579429<br>O 0.552458 0.978307 -0.858821<br>C 0.470638 2.414215 -0.854197<br>O -0.949791 1.572479 1.752027<br>O -0.259317 -2.858224 0.814443<br>S 3.502305 0.912190 -1.536072<br>O 1.441184 -1.224268 -0.844228<br>C 2.356452 -2.325310 -0.756673<br>H 0.736249 -0.160323 3.205202<br>H 1.234253 -1.644477 2.332299<br>H -3.275178 1.980470 -0.077995<br>H -2.596431 -3.024436 -1.133258<br>H -4.796666 0.648448 -1.739414<br>H -4.450631 -1.746272 -2.228162<br>H 2.860958 -2.325370 0.214906<br>H 3.093261 -2.258060 -1.560115<br>H 1.747498 -3.222160 -0.854275<br>H -0.578747 2.652472 -1.030120<br>H 1.098632 2.822725 -1.648559<br>H 0.778296 2.802433 0.121324<br>O -3.016780 3.103552 0.314522<br>H -2.332788 2.894762 0.984674 | C -3.846999 -1.303423 -1.498671<br>C -2.800814 -2.002223 -0.881773<br>C -1.990562 -1.303758 -0.005449<br>C -2.196865 0.050879 0.274601<br>C -3.232768 0.699277 -0.341236<br>C -4.069257 0.055618 -1.234887<br>C -0.804879 -1.762660 0.775526<br>N -0.357703 -0.626804 1.480896<br>C -1.147895 0.493720 1.236273<br>C 0.865032 -0.596912 2.226746<br>S 2.246650 0.400025 1.484871<br>P 1.939583 0.206318 -0.588719<br>O 0.524569 0.894630 -0.899890<br>C 0.430570 2.330983 -0.958738<br>O -0.969016 1.578886 1.747271<br>O -0.313516 -2.860618 0.852198<br>S 3.481714 0.827352 -1.553484<br>O 1.430418 -1.298442 -0.805721<br>C 2.350576 -2.389169 -0.669837<br>H 0.699013 -0.137784 3.203173<br>H 1.192027 -1.630733 2.342731<br>H -2.870485 4.239012 0.609186<br>H -2.620773 -3.052166 -1.085939<br>H -4.879587 0.584261 -1.726410<br>H -4.497337 -1.819077 -2.198349<br>H 2.856088 -2.344189 0.300358<br>H 3.087399 -2.353642 -1.475372<br>H 1.745946 -3.292489 -0.727955<br>H -0.619678 2.558728 -1.139170<br>H 1.058831 2.707233 -1.768673<br>H 0.736926 2.762980 -0.001105<br>O -2.363207 3.530755 0.202407<br>H -1.942821 3.037008 0.924450 | C 4.162498 0.194123 -1.470089<br>C 3.230916 1.126332 -0.997417<br>C 2.297392 0.693382 -0.072521<br>C 2.268646 -0.624431 0.394327<br>C 3.198178 -1.503213 -0.090826<br>C 4.153357 -1.134246 -1.018795<br>C 1.194282 1.446325 0.595833<br>N 0.554359 0.514421 1.427428<br>C 1.144606 -0.756657 1.369434<br>C -0.639693 0.802652 2.158795<br>S -2.211215 0.055494 1.494939<br>P -1.846239 -0.190537 -0.559946<br>O -0.612317 -1.212244 -0.682734<br>C -0.836253 -2.611207 -0.443326<br>O 0.780522 -1.711959 2.007766<br>O 0.899101 2.612393 0.499327<br>S -3.479181 -0.641835 -1.469658<br>O -1.022728 1.102617 -1.026514<br>C -1.688053 2.369734 -1.125070<br>H -0.560542 0.401788 3.170935<br>H -0.752410 1.886830 2.181256<br>H 3.231348 2.154667 -1.342560<br>H 4.881540 -1.845652 -1.394877<br>H 4.906454 0.498874 -2.199438<br>H -2.439616 2.331864 -1.916835<br>H -2.158788 2.627107 -0.171039<br>H -0.908749 3.093803 -1.354858<br>H 0.135944 -3.088603 -0.560735<br>H -1.197504 -2.763409 0.577598<br>H -1.550204 -3.001913 -1.171537 |

**Table S5.** Optimized Cartesian coordinates for the stationary points involved in the H23-abstraction pathway in gas phase calculated at the M06-2X/6-31+G(d,p) level of theory.

| MCR(H23-abs)                                                                      |           |           |           | TS(H23-abs)                                                                       |           |           |           | MCP(H23-abs)                                                                        |           |           |           | Rad(H23-abs)                                                                        |           |           |           |
|-----------------------------------------------------------------------------------|-----------|-----------|-----------|-----------------------------------------------------------------------------------|-----------|-----------|-----------|-------------------------------------------------------------------------------------|-----------|-----------|-----------|-------------------------------------------------------------------------------------|-----------|-----------|-----------|
| 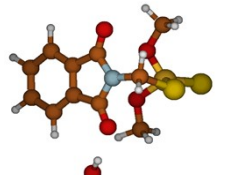 |           |           |           |  |           |           |           |  |           |           |           |  |           |           |           |
| C                                                                                 | 4.060823  | 0.160215  | -1.239535 | C                                                                                 | -3.995982 | -0.108285 | -1.245341 | C                                                                                   | -4.068906 | -0.055976 | -1.235071 | C                                                                                   | -4.153418 | -1.134191 | -1.018799 |
| C                                                                                 | 3.208556  | 0.852755  | -0.371084 | C                                                                                 | -3.160435 | -0.753282 | -0.338252 | C                                                                                   | -3.232413 | -0.699366 | -0.341239 | C                                                                                   | -3.198226 | -1.503198 | -0.090860 |
| C                                                                                 | 2.209822  | 0.117005  | 0.243988  | C                                                                                 | -2.146965 | -0.048956 | 0.266122  | C                                                                                   | -2.196754 | -0.050688 | 0.274711  | C                                                                                   | -2.268670 | -0.624440 | 0.394296  |
| C                                                                                 | 2.053066  | -1.247018 | 0.009911  | C                                                                                 | -1.945808 | 1.298782  | -0.022558 | C                                                                                   | -1.990607 | 1.303939  | -0.005499 | C                                                                                   | -2.297403 | 0.693385  | -0.072521 |
| C                                                                                 | 2.892550  | -1.940478 | -0.842407 | C                                                                                 | -2.761015 | 1.975211  | -0.912244 | C                                                                                   | -2.800868 | 2.002146  | -0.882022 | C                                                                                   | -3.230936 | 1.126371  | -0.997391 |
| C                                                                                 | 3.907991  | -1.209807 | -1.469584 | C                                                                                 | -3.793614 | 1.250573  | -1.520562 | C                                                                                   | -3.846862 | 1.303091  | -1.498951 | C                                                                                   | -4.162542 | 0.194188  | -1.470065 |
| C                                                                                 | 1.147768  | 0.543585  | 1.198115  | C                                                                                 | -1.106881 | -0.485720 | 1.237916  | C                                                                                   | -1.147739 | -0.493309 | 1.236420  | C                                                                                   | -1.144624 | -0.756706 | 1.369382  |
| N                                                                                 | 0.397485  | -0.592270 | 1.478468  | N                                                                                 | -0.314387 | 0.633461  | 1.475350  | N                                                                                   | -0.357637 | 0.627285  | 1.480901  | N                                                                                   | -0.554367 | 0.514371  | 1.427414  |
| C                                                                                 | 0.885287  | -1.730191 | 0.799833  | C                                                                                 | -0.758114 | 1.763145  | 0.754267  | C                                                                                   | -0.804885 | 1.763004  | -0.775340 | C                                                                                   | -1.194286 | 1.446301  | 0.595857  |
| C                                                                                 | -0.818159 | -0.587595 | 2.235201  | C                                                                                 | 0.905789  | 0.610327  | 2.225157  | C                                                                                   | 0.865301  | 0.597531  | 2.226440  | C                                                                                   | 0.639673  | 0.802563  | 2.158812  |
| S                                                                                 | -2.245015 | 0.335590  | 1.481073  | S                                                                                 | 2.289678  | -0.394298 | 1.495660  | S                                                                                   | 2.246357  | -0.400410 | 1.484878  | S                                                                                   | 2.211203  | 0.055417  | 1.494955  |
| P                                                                                 | -1.934814 | 0.134926  | -0.589405 | P                                                                                 | 1.965761  | -0.267373 | -0.579468 | P                                                                                   | 1.939462  | -0.206502 | -0.588739 | P                                                                                   | 1.846259  | -0.190517 | -0.559943 |
| O                                                                                 | -1.349250 | -1.342398 | -0.797348 | O                                                                                 | 1.440928  | 1.224167  | -0.844329 | O                                                                                   | 1.430866  | 1.298496  | -0.805535 | O                                                                                   | 1.022780  | 1.102675  | -1.026469 |
| C                                                                                 | -2.215789 | -2.476809 | -0.655829 | C                                                                                 | 2.356078  | 2.325311  | -0.756815 | C                                                                                   | 2.351437  | 2.388855  | -0.669489 | C                                                                                   | 1.688138  | 2.369782  | -1.124964 |
| O                                                                                 | 0.428272  | -2.840543 | 0.903059  | O                                                                                 | -0.259285 | 2.858280  | 0.814348  | O                                                                                   | -0.313521 | 2.860975  | 0.851760  | O                                                                                   | -0.899095 | 2.612369  | 0.499367  |
| O                                                                                 | 0.928981  | 1.635918  | 1.684167  | O                                                                                 | -0.949723 | -1.572388 | 1.752174  | O                                                                                   | -0.968864 | -1.578386 | 1.747614  | O                                                                                   | -0.780549 | -1.712020 | 2.007702  |
| S                                                                                 | -3.504430 | 0.674871  | -1.557497 | S                                                                                 | 3.502251  | -0.912092 | -1.536140 | S                                                                                   | 3.481314  | -0.828070 | -1.553602 | S                                                                                   | 3.479207  | -0.641806 | -1.469648 |
| O                                                                                 | -0.554886 | 0.892996  | -0.913660 | O                                                                                 | 0.552436  | -0.978490 | -0.858743 | O                                                                                   | 0.524201  | -0.894213 | -0.900021 | O                                                                                   | 0.612323  | -1.212205 | -0.682794 |
| C                                                                                 | -0.535937 | 2.327582  | -0.983162 | C                                                                                 | 0.470726  | -2.414403 | -0.853938 | C                                                                                   | 0.429524  | -2.330490 | -0.959196 | C                                                                                   | 0.836258  | -2.611180 | -0.443443 |
| H                                                                                 | -1.106121 | -1.628975 | 2.382360  | H                                                                                 | 1.234306  | 1.644574  | 2.332297  | H                                                                                   | 1.192655  | 1.631338  | 2.341543  | H                                                                                   | 0.752401  | 1.886739  | 2.181316  |
| H                                                                                 | -0.660958 | -0.095317 | 3.196791  | H                                                                                 | 0.736343  | 0.160463  | 3.205268  | H                                                                                   | 0.699478  | 0.139202  | 3.203277  | H                                                                                   | 0.560504  | 0.401653  | 3.170932  |
| H                                                                                 | 2.759040  | -3.002966 | -1.016292 | H                                                                                 | -2.596357 | 3.024383  | -1.133333 | H                                                                                   | -2.620982 | 3.052084  | -1.086350 | H                                                                                   | -3.231358 | 2.154714  | -1.342508 |
| H                                                                                 | 3.312918  | 1.919906  | -0.198238 | H                                                                                 | -3.275036 | -1.980571 | -0.078043 | H                                                                                   | -2.870958 | -4.237939 | 0.611766  | H                                                                                   | -4.906507 | 0.498967  | -2.199393 |
| H                                                                                 | 4.586957  | -1.712859 | -2.150335 | H                                                                                 | -4.450424 | 1.746123  | -2.228358 | H                                                                                   | -4.497183 | 1.818559  | -2.198784 | H                                                                                   | -4.881620 | -1.845575 | -1.394886 |
| H                                                                                 | 4.854549  | 0.698443  | -1.747180 | H                                                                                 | -4.796413 | -0.648593 | -1.739564 | H                                                                                   | -4.879038 | -0.584827 | -1.726692 | H                                                                                   | 1.197549  | -2.763425 | 0.577461  |
| H                                                                                 | -0.815630 | 2.754787  | -0.015222 | H                                                                                 | 0.778182  | -2.802445 | 0.121717  | H                                                                                   | 0.736165  | -2.762927 | -0.001856 | H                                                                                   | 1.550174  | -3.001867 | -1.171697 |
| H                                                                                 | -1.215323 | 2.673045  | -1.765196 | H                                                                                 | 1.098939  | -2.822983 | -1.648093 | H                                                                                   | 1.057189  | -2.706793 | -1.769568 | H                                                                                   | -0.135950 | -3.088557 | -0.560830 |
| H                                                                                 | 0.492230  | 2.599348  | -1.228467 | H                                                                                 | -0.578599 | -2.652764 | -1.030070 | H                                                                                   | -0.620915 | -2.557737 | -1.139194 | H                                                                                   | 0.908864  | 3.093875  | -1.354776 |
| H                                                                                 | -1.568196 | -3.349709 | -0.713772 | H                                                                                 | 1.746949  | 3.222098  | -0.853902 | H                                                                                   | 1.747052  | 3.292395  | -0.726799 | H                                                                                   | 2.439741  | 2.331909  | -1.916690 |
| H                                                                                 | -2.955958 | -2.478372 | -1.458937 | H                                                                                 | 3.092571  | 2.258398  | -1.560573 | H                                                                                   | 3.087834  | 2.353551  | -1.475422 | H                                                                                   | 2.158829  | 2.627122  | -0.170902 |
| H                                                                                 | -2.718518 | -2.453861 | 0.316432  | H                                                                                 | 2.860978  | 2.325177  | 0.214563  | H                                                                                   | 2.857467  | 2.343164  | 0.300405  |                                                                                     |           |           |           |
| O                                                                                 | 1.908101  | 3.894491  | 0.318903  | O                                                                                 | -3.016610 | -3.103629 | 0.314436  | O                                                                                   | -2.362819 | -3.531133 | 0.203518  |                                                                                     |           |           |           |
| H                                                                                 | 1.600333  | 3.251966  | 0.998994  | H                                                                                 | -2.332690 | -2.894911 | 0.984675  | H                                                                                   | -1.942244 | -3.036281 | 0.924718  |                                                                                     |           |           |           |

**Table S6.** Optimized Cartesian coordinates for the stationary points involved in the H24-abstraction pathway in gas phase calculated at the M06-2X/6-31+G(d,p) level of theory.

| MCR(H24-abs)                                                                                                                                                                                                                                                                                                                                                                                                                                                                                                                                                                                                                                                                                                                                                                                                                                                                                                                                                                                                                                                                                                                                     | TS(H24-abs)                                                                                                                                                                                                                                                                                                                                                                                                                                                                                                                                                                                                                                                                                                                                                                                                                                                                                                                                                                                                                                                                                                                                  | MCP(H24-abs)                                                                                                                                                                                                                                                                                                                                                                                                                                                                                                                                                                                                                                                                                                                                                                                                                                                                                                                                                                                                                                                                                                                                 | Rad(H24-abs)                                                                                                                                                                                                                                                                                                                                                                                                                                                                                                                                                                                                                                                                                                                                                                                                                                                                                                                                                                                                                                |
|--------------------------------------------------------------------------------------------------------------------------------------------------------------------------------------------------------------------------------------------------------------------------------------------------------------------------------------------------------------------------------------------------------------------------------------------------------------------------------------------------------------------------------------------------------------------------------------------------------------------------------------------------------------------------------------------------------------------------------------------------------------------------------------------------------------------------------------------------------------------------------------------------------------------------------------------------------------------------------------------------------------------------------------------------------------------------------------------------------------------------------------------------|----------------------------------------------------------------------------------------------------------------------------------------------------------------------------------------------------------------------------------------------------------------------------------------------------------------------------------------------------------------------------------------------------------------------------------------------------------------------------------------------------------------------------------------------------------------------------------------------------------------------------------------------------------------------------------------------------------------------------------------------------------------------------------------------------------------------------------------------------------------------------------------------------------------------------------------------------------------------------------------------------------------------------------------------------------------------------------------------------------------------------------------------|----------------------------------------------------------------------------------------------------------------------------------------------------------------------------------------------------------------------------------------------------------------------------------------------------------------------------------------------------------------------------------------------------------------------------------------------------------------------------------------------------------------------------------------------------------------------------------------------------------------------------------------------------------------------------------------------------------------------------------------------------------------------------------------------------------------------------------------------------------------------------------------------------------------------------------------------------------------------------------------------------------------------------------------------------------------------------------------------------------------------------------------------|---------------------------------------------------------------------------------------------------------------------------------------------------------------------------------------------------------------------------------------------------------------------------------------------------------------------------------------------------------------------------------------------------------------------------------------------------------------------------------------------------------------------------------------------------------------------------------------------------------------------------------------------------------------------------------------------------------------------------------------------------------------------------------------------------------------------------------------------------------------------------------------------------------------------------------------------------------------------------------------------------------------------------------------------|
| 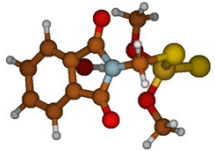                                                                                                                                                                                                                                                                                                                                                                                                                                                                                                                                                                                                                                                                                                                                                                                                                                                                                                                                                                                                                                                                |                                                                                                                                                                                                                                                                                                                                                                                                                                                                                                                                                                                                                                                                                                                                                                                                                                                                                                                                                                                                                                                             |                                                                                                                                                                                                                                                                                                                                                                                                                                                                                                                                                                                                                                                                                                                                                                                                                                                                                                                                                                                                                                                           |                                                                                                                                                                                                                                                                                                                                                                                                                                                                                                                                                                                                                                                                                                                                                                                                                                                                                                                                                          |
| C -4.103221 0.153520 -1.222538<br>C -3.124742 -0.843060 -1.298859<br>C -2.164636 -0.862231 -0.302666<br>C -2.172860 0.062903 0.738899<br>C -3.135826 1.053685 0.824623<br>C -4.107405 1.086424 -0.182356<br>C -1.000348 -1.773399 -0.112602<br>N -0.362673 -1.325539 1.058288<br>C -1.017838 -0.228465 1.635895<br>C 0.861263 -1.870472 1.546063<br>S 2.403622 -0.871410 1.211941<br>P 1.913744 0.411018 -0.369642<br>O 0.684421 1.330209 0.139172<br>C 0.935918 2.377756 1.097629<br>O -0.672026 0.317311 2.656014<br>O -0.644653 -2.719878 -0.771907<br>S 3.491538 1.313866 -0.991138<br>O 1.028419 -0.424908 -1.411846<br>C 1.657896 -1.419976 -2.235767<br>H 0.821563 -1.947406 2.633816<br>H 0.993383 -2.851280 1.089227<br>H -3.126914 1.775084 1.635086<br>H -3.107557 -1.568350 -2.105461<br>H -4.870590 1.857098 -0.162902<br>H -4.867408 0.212703 -1.990340<br>H 2.406013 -0.948094 -2.876372<br>H 2.119345 -2.188933 -1.609530<br>H 0.857688 -1.862958 -2.824912<br>H -0.020410 2.881371 1.235253<br>H 1.265737 1.937613 2.041502<br>H 1.682498 3.067429 0.698899<br>O -1.594827 2.419768 -1.248699<br>H -0.823190 1.869684 -0.992295 | C -3.870674 -0.828599 -1.009526<br>C -2.749377 -1.633069 -0.765821<br>C -1.806138 -1.149784 0.124756<br>C -1.954365 0.076294 0.766205<br>C -3.056774 0.887927 0.547598<br>C -3.994615 0.389719 -0.350812<br>C -0.516447 -1.755893 0.569445<br>N 0.041507 -0.837798 1.469210<br>C -0.771944 0.292610 1.652303<br>C 1.338632 -0.976362 2.052867<br>S 2.788319 -0.732637 0.907695<br>P 2.045738 0.477282 -0.641678<br>O 1.080443 1.554751 0.047802<br>C 1.650295 2.619714 0.823134<br>O -0.536487 1.205405 2.404849<br>O -0.017723 -2.811366 0.263104<br>S 3.494141 1.092085 -1.746965<br>O 0.867779 -0.359237 -1.346460<br>C 1.213934 -1.459997 -2.202047<br>H 1.411865 -0.248100 2.860812<br>H 1.465271 -1.991118 2.434200<br>H -3.174521 1.842890 1.048942<br>H -2.620312 -2.594473 -1.252782<br>H -5.002709 1.051690 -0.568519<br>H -4.642409 -1.151480 -1.700672<br>H 1.744012 -2.226478 -1.629868<br>H 1.823558 -1.104831 -3.035733<br>H 0.267652 -1.862276 -2.561778<br>H 0.806056 3.153813 1.254688<br>H 2.242549 3.270901 0.176475<br>H 2.275345 2.213247 1.624260<br>O -5.852603 1.849405 -1.046125<br>H -5.318781 2.313382 -1.714957 | C -3.954344 -0.735757 0.303350<br>C -2.872993 -0.770505 1.198211<br>C -1.825982 0.108824 0.969647<br>C -1.826108 1.005272 -0.096019<br>C -2.880567 1.071498 -0.999191<br>C -3.895719 0.173226 -0.734901<br>C -0.557584 0.292980 1.731362<br>N 0.140357 1.312080 1.066318<br>C -0.563932 1.801596 -0.045375<br>C 1.461802 1.732773 1.410021<br>S 2.834853 0.529905 1.036253<br>P 2.092148 -0.641889 -0.541550<br>O 1.290494 0.356378 -1.505046<br>C 2.015456 1.288283 -2.319787<br>O -0.198883 2.703240 -0.759739<br>O -0.164656 -0.273327 2.722501<br>S 3.502322 -1.723230 -1.277794<br>O 0.789469 -1.393012 0.024123<br>C 0.957577 -2.499911 0.923694<br>H 1.658662 2.659955 0.871266<br>H 1.531568 1.890087 2.487891<br>H -2.883948 1.769676 -1.829776<br>H -2.853205 -1.456313 2.039663<br>H -6.148109 -0.627518 -1.836425<br>H -4.812745 -1.391555 0.409531<br>H 1.452262 -2.165563 1.839875<br>H 1.532133 -3.290726 0.436480<br>H -0.049283 -2.844292 1.156885<br>H 1.260749 1.907837 -2.800293<br>H 2.612666 0.747231 -3.057167<br>H 2.662069 1.914520 -1.697147<br>O -6.551352 -1.251927 -1.222730<br>H -7.388560 -1.516851 -1.616129 | C -4.165758 -1.023670 -1.120987<br>C -3.241231 -1.466635 -0.161271<br>C -2.317080 -0.544454 0.302693<br>C -2.292302 0.773754 -0.146515<br>C -3.195635 1.245775 -1.090787<br>C -4.094444 0.293036 -1.529947<br>C -1.221061 -0.717866 1.298714<br>N -0.591963 0.531936 1.391566<br>C -1.185655 1.491186 0.555893<br>C 0.582694 0.781008 2.166353<br>S 2.165162 0.029855 1.531630<br>P 1.849343 -0.204505 -0.532355<br>O 1.054116 1.098497 -1.019067<br>C 1.737858 2.357495 -1.098305<br>O -0.857202 2.649685 0.481227<br>O -0.904100 -1.695590 1.931818<br>S 3.500356 -0.672858 -1.399989<br>O 0.607688 -1.212566 -0.690031<br>C 0.812330 -2.612661 -0.444436<br>H 0.712463 1.862028 2.222484<br>H 0.464593 0.353707 3.163730<br>H -3.179770 2.272171 -1.442230<br>H -3.246286 -2.488053 0.206689<br>H -4.912580 -1.699320 -1.525370<br>H 1.126016 -2.769322 0.591405<br>H 1.555607 -3.007126 -1.140678<br>H -0.155904 -3.084454 -0.607753<br>H 0.978525 3.087883 -1.370705<br>H 2.524682 2.303911 -1.854108<br>H 2.165648 2.618619 -0.125389 |



**Table S7.** Optimized Cartesian coordinates for the stationary points involved in the H25-abstraction pathway in gas phase calculated at the M06-2X/6-31+G(d,p) level of theory.

| MCR(H25-abs)                                                                      | TS(H25-abs)                                                                       | MCP(H25-abs)                                                                        | Rad(H25-abs)                                                                        |
|-----------------------------------------------------------------------------------|-----------------------------------------------------------------------------------|-------------------------------------------------------------------------------------|-------------------------------------------------------------------------------------|
| 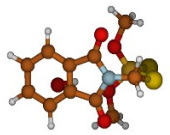 |  |  |  |
| C 4.107267 1.086525 -0.182663                                                     | C -3.994692 -0.373629 -0.307738                                                   | C 3.895017 0.660020 0.194176                                                        | C -4.093748 -1.012395 -1.132183                                                     |
| C 3.135733 1.053916 0.824368                                                      | C -3.058515 -0.687476 0.672478                                                    | C 2.884587 0.814293 1.123212                                                        | C -3.200961 -1.559613 -0.230761                                                     |
| C 2.172843 0.063040 0.738898                                                      | C -1.948669 0.141544 0.720127                                                     | C 1.827731 -0.071684 0.951468                                                       | C -2.295718 -0.643512 0.290139                                                      |
| C 2.164629 -0.862296 -0.302493                                                    | C -1.792407 1.211172 -0.156441                                                    | C 1.820475 -1.020278 -0.068103                                                      | C -2.313779 0.700503 -0.074712                                                      |
| C 3.124679 -0.843242 -1.298738                                                    | C -2.733581 1.511221 -1.126375                                                    | C 2.862722 -1.140492 -0.974588                                                      | C -3.232115 1.208282 -0.979823                                                      |
| C 4.103095 0.153421 -1.222660                                                     | C -3.862237 0.684156 -1.200465                                                    | C 3.945834 -0.258286 -0.836206                                                      | C -4.157592 0.307788 -1.531105                                                      |
| C 1.017836 -0.228187 1.635961                                                     | C -0.760249 0.096925 1.624017                                                     | C 0.564294 -0.212195 1.735215                                                       | C -1.185162 -0.849748 1.268438                                                      |
| N 0.362679 -1.325374 1.058552                                                     | N 0.054124 1.164275 1.225046                                                      | N -0.139689 -1.257949 1.126705                                                      | N -0.593890 0.407995 1.435232                                                       |
| C 1.000363 -1.773449 -0.112252                                                    | C -0.503393 1.893390 0.160985                                                     | C 0.557176 -1.805153 0.033602                                                       | C -1.224139 1.400918 0.663527                                                       |
| C -0.861213 -1.870241 1.546484                                                    | C 1.353327 1.423112 1.761293                                                      | C -1.457288 -1.661561 1.502405                                                      | C 0.584504 0.642550 2.209291                                                        |
| S -2.403719 -0.871583 1.211718                                                    | S 2.694642 0.218607 1.290158                                                      | S -2.839411 -0.492853 1.056278                                                      | S 2.172375 -0.046866 1.521687                                                       |
| P -1.913696 0.410901 -0.369746                                                    | P 2.045389 -0.616080 -0.525649                                                    | P -2.092579 0.625117 -0.558332                                                      | P 1.848414 -0.138707 -0.552421                                                      |
| O -1.027943 -0.424818 -1.411742                                                   | O 1.387530 0.580505 -1.364330                                                     | O -1.274685 -0.398207 -1.480131                                                     | O 1.023489 1.179893 -0.936978                                                       |
| C -1.657013 -1.419771 -2.236104                                                   | C 2.232059 1.589094 -1.938023                                                     | C -1.984999 -1.364848 -2.267411                                                     | C 1.680692 2.455183 -0.926778                                                       |
| O 0.644656 -2.720048 -0.771375                                                    | O -0.016899 2.879496 -0.335435                                                    | O 0.177935 -2.739917 -0.628764                                                      | O -0.926124 2.570215 0.662906                                                       |
| O 0.672020 0.317761 2.655987                                                      | O -0.510122 -0.663502 2.526916                                                    | O 0.187084 0.405325 2.701733                                                        | O -0.837521 -1.858448 1.832683                                                      |
| S -3.491543 1.313421 -0.991591                                                    | S 3.462669 -1.646375 -1.317808                                                    | S -3.507509 1.665750 -1.342951                                                      | S 3.501938 -0.509458 -1.461600                                                      |
| O -0.684662 1.330346 0.139347                                                     | O 0.658910 -1.366754 -0.211484                                                    | O -0.801518 1.409587 -0.010628                                                      | O 0.625953 -1.157964 -0.776357                                                      |
| C -0.936553 2.377770 1.097819                                                     | C 0.690259 -2.618052 0.493320                                                     | C -0.989234 2.544032 0.849492                                                       | C 0.859610 -2.568015 -0.634095                                                      |
| H -0.993198 -2.851281 1.090106                                                    | H 1.650505 2.417748 1.428215                                                      | H -1.652733 -2.621668 1.024349                                                      | H 0.692390 1.722173 2.316534                                                        |
| H -0.821575 -1.946627 2.634276                                                    | H 1.319553 1.374510 2.851133                                                      | H -1.520747 -1.749841 2.588410                                                      | H 0.487856 0.165661 3.186395                                                        |
| H 3.107509 -1.568684 -2.105204                                                    | H -2.595527 2.350148 -1.800583                                                    | H 2.835571 -1.888530 -1.760556                                                      | H -3.228660 2.259490 -1.249946                                                      |
| H 3.126802 1.775488 1.634677                                                      | H -3.186083 -1.517421 1.359962                                                    | H 2.895786 1.550215 1.920818                                                        | H -3.193746 -2.606258 0.056184                                                      |
| H 4.867243 0.212490 -1.990510                                                     | H -4.632679 0.866764 -1.942411                                                    | H 4.799564 -0.283487 -1.505846                                                      | H -4.898650 0.643959 -2.249097                                                      |
| H 4.870400 1.857254 -0.163425                                                     | H -5.008940 -1.056514 -0.380862                                                   | H 6.213169 1.787188 -0.424210                                                       | H 1.160899 -2.795422 0.392268                                                       |
| H -1.266271 1.937488 2.041662                                                     | H 1.116677 -2.475902 1.490213                                                     | H -1.486556 2.235152 1.773154                                                       | H 1.622234 -2.892078 -1.345592                                                      |
| H -1.683349 3.067211 0.699085                                                     | H 1.265988 -3.350847 -0.076232                                                    | H -1.569871 3.310698 0.331776                                                       | H -0.094575 -3.047346 -0.849842                                                     |
| H 0.019596 2.881707 1.235504                                                      | H -0.349150 -2.931607 0.583070                                                    | H 0.011491 2.908607 1.078097                                                        | H 0.903311 3.188181 -1.133232                                                       |
| H -0.856721 -1.861709 -2.825921                                                   | H 1.558593 2.317311 -2.385599                                                     | H -1.220489 -1.977136 -2.741503                                                     | H 2.458626 2.476334 -1.693261                                                       |
| H -2.405768 -0.948031 -2.876069                                                   | H 2.885596 1.140084 -2.689199                                                     | H -2.601120 -0.854373 -3.010972                                                     | H 2.116383 2.649863 0.058214                                                        |
| H -2.117552 -2.189529 -1.610187                                                   | H 2.828671 2.072277 -1.158140                                                     | H -2.609786 -1.992177 -1.624180                                                     |                                                                                     |
| O 1.594762 2.419788 -1.248398                                                     | O -5.869663 -1.929635 -0.674580                                                   | O 6.569706 1.277361 -1.160371                                                       |                                                                                     |
| H 0.823089 1.869782 -0.991938                                                     | H -5.359347 -2.500620 -1.275486                                                   | H 7.396860 1.701548 -1.408882                                                       |                                                                                     |

**Table S8.** Optimized Cartesian coordinates for the stationary points involved in the H26-abstraction pathway in gas phase calculated at the M06-2X/6-31+G(d,p) level of theory.

| MCR(H26-abs)                                                                      | TS(H26-abs)                                                                       | MCP(H26-abs)                                                                        | Rad(H26-abs)                                                                        |
|-----------------------------------------------------------------------------------|-----------------------------------------------------------------------------------|-------------------------------------------------------------------------------------|-------------------------------------------------------------------------------------|
| 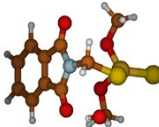 |  |  |  |
| C 4.265315 0.143313 -1.411773                                                     | C 4.192465 0.972955 -1.126469                                                     | C 4.252049 0.182312 -1.466615                                                       | C 4.183180 0.080074 -1.462213                                                       |
| C 3.219639 1.033824 -1.144677                                                     | C 3.195771 1.488657 -0.290425                                                     | C 3.192418 1.072031 -1.260422                                                       | C 3.237966 1.061870 -1.146592                                                       |
| C 2.304126 0.656445 -0.178689                                                     | C 2.317982 0.580906 0.274905                                                      | C 2.284883 0.750534 -0.266814                                                       | C 2.293213 0.741981 -0.187525                                                       |
| C 2.413969 -0.549933 0.504675                                                     | C 2.417848 -0.785451 0.032420                                                     | C 2.417366 -0.401882 0.501205                                                       | C 2.280813 -0.497850 0.442351                                                       |
| C 3.445656 -1.436625 0.253283                                                     | C 3.401553 -1.307724 -0.788279                                                    | C 3.463808 -1.286757 0.311062                                                       | C 3.213831 -1.475234 0.143893                                                       |
| C 4.375937 -1.069861 -0.725382                                                    | C 4.293102 -0.400131 -1.370949                                                    | C 4.385382 -0.976122 -0.694759                                                      | C 4.171655 -1.166301 -0.828074                                                      |
| C 1.093835 1.366473 0.320377                                                      | C 1.160269 0.809529 1.185197                                                      | C 1.067937 1.482316 0.186903                                                        | C 1.170020 1.558464 0.357920                                                        |
| N 0.538499 0.545375 1.297474                                                      | N 0.623561 -0.451087 1.447092                                                     | N 0.520376 0.706364 1.213880                                                        | N 0.528704 0.733444 1.301076                                                        |
| C 1.282003 -0.643696 1.469903                                                     | C 1.332382 -1.476348 0.787168                                                     | C 1.284990 -0.446912 1.468897                                                       | C 1.142794 -0.521857 1.407238                                                       |
| C -0.714187 0.775726 1.958046                                                     | C -0.586791 -0.682740 2.178771                                                    | C -0.694726 1.001219 1.905214                                                       | C -0.692690 1.096762 1.955576                                                       |
| S -2.220031 0.778475 0.871634                                                     | S -2.125345 0.055779 1.453054                                                     | S -2.235008 0.141778 1.278123                                                       | S -2.180668 0.073559 1.529662                                                       |
| P -1.748008 -0.644758 -0.605631                                                   | P -1.831513 -0.215521 -0.606505                                                   | P -1.708835 -0.754390 -0.533388                                                     | P -1.931715 -0.250357 -0.521594                                                     |
| O -0.888911 -1.773640 0.140293                                                    | O -1.032463 -1.599289 -0.733534                                                   | O -0.421212 -1.674459 -0.274037                                                     | O -0.614765 -1.156398 -0.688293                                                     |
| C -1.544963 -2.699168 1.018822                                                    | C -1.712967 -2.839695 -0.498598                                                   | C -0.592219 -2.932092 0.402281                                                      | C -0.696096 -2.559437 -0.390907                                                     |
| O 1.025667 -1.505145 2.272576                                                     | O 1.088909 -2.653564 0.878200                                                     | O 1.030802 -1.259170 2.323829                                                       | O 0.786069 -1.406014 2.148211                                                       |
| O 0.655297 2.443990 -0.026635                                                     | O 0.738934 1.850151 1.638853                                                      | O 0.628748 2.538230 -0.210765                                                       | O 0.857509 2.695120 0.101941                                                        |
| S -3.316937 -1.148622 -1.593588                                                   | S -3.452752 0.040571 -1.599362                                                    | S -3.252469 -1.553145 -1.350428                                                     | S -3.553693 -0.863969 -1.344969                                                     |
| O -0.511229 -0.027813 -1.430472                                                   | O -0.561520 0.711518 -0.997802                                                    | O -0.898819 0.367897 -1.388439                                                      | O -1.232791 1.101641 -1.078844                                                      |
| C -0.767694 1.018529 -2.379507                                                    | C -0.738821 2.056006 -1.387903                                                    | C -1.577892 1.409976 -1.972710                                                      | C -1.934862 2.285170 -1.108508                                                      |
| H -0.818457 -0.003645 2.713632                                                    | H -0.702829 -1.764101 2.263018                                                    | H -0.595645 0.671821 2.940009                                                       | H -0.599630 0.979188 3.037382                                                       |
| H -0.734910 1.764962 2.420705                                                     | H -0.524664 -0.231891 3.171739                                                    | H -0.902471 2.070112 1.839221                                                       | H -0.896703 2.137528 1.698183                                                       |
| H 3.521365 -2.374568 0.793140                                                     | H 3.469611 -2.375025 -0.970373                                                    | H 3.559592 -2.179939 0.919782                                                       | H 3.197298 -2.436575 0.647390                                                       |
| H 3.125773 1.980775 -1.666364                                                     | H 3.108561 2.551504 -0.088758                                                     | H 3.079607 1.975497 -1.850391                                                       | H 3.236081 2.032818 -1.630604                                                       |
| H 5.199382 -1.737276 -0.957475                                                    | H 5.077815 -0.766172 -2.024905                                                    | H 5.220217 -1.644039 -0.880354                                                      | H 4.920674 -1.904614 -1.095521                                                      |
| H 5.005560 0.396959 -2.163534                                                     | H 4.901459 1.648553 -1.593828                                                     | H 4.985439 0.392861 -2.238071                                                       | H 4.939844 0.286723 -2.212026                                                       |
| H -1.237127 1.873260 -1.882943                                                    | H -1.137901 2.719450 -0.482316                                                    | H -2.636344 2.995288 0.128892                                                       | H -2.976722 2.235326 -1.402543                                                      |
| H -1.406040 0.643592 -3.182248                                                    | H -1.486159 2.157934 -2.178753                                                    | H -2.558179 1.193596 -2.382781                                                      | H -1.297412 3.138995 -1.281463                                                      |
| H 0.207627 1.310671 -2.767347                                                     | H 0.240204 2.444306 -1.664994                                                     | H -0.915378 2.155576 -2.386937                                                      | H 0.302710 -2.955414 -0.572220                                                      |
| H -0.747508 -3.263508 1.498677                                                    | H -0.933412 -3.598794 -0.464410                                                   | H 0.401827 -3.372870 0.457484                                                       | H -0.964922 -2.704540 0.659423                                                      |
| H -2.202109 -3.353420 0.441852                                                    | H -2.418725 -3.031818 -1.309668                                                   | H -1.268258 -3.570190 -0.170701                                                     | H -1.423762 -3.038314 -1.049785                                                     |
| H -2.124750 -2.161610 1.776201                                                    | H -2.245862 -2.809928 0.457655                                                    | H -0.974978 -2.764850 1.412575                                                      |                                                                                     |
| O -1.783911 3.585288 1.028692                                                     | O -1.452872 3.487515 0.587135                                                     | O -2.007265 3.585248 0.560253                                                       |                                                                                     |
| H -0.963800 3.348306 0.542978                                                     | H -0.875444 3.038411 1.236646                                                     | H -1.167945 3.440614 0.099648                                                       |                                                                                     |



**Table S9.** Optimized Cartesian coordinates for the stationary points involved in the H27-abstraction pathway in gas phase calculated at the M06-2X/6-31+G(d,p) level of theory.

| MCR(H27-abs)                                                                      |           |           |           | TS(H27-abs)                                                                       |           |           |           | MCP(H27-abs)                                                                        |           |           |           | Rad(H27-abs)                                                                        |           |           |           |
|-----------------------------------------------------------------------------------|-----------|-----------|-----------|-----------------------------------------------------------------------------------|-----------|-----------|-----------|-------------------------------------------------------------------------------------|-----------|-----------|-----------|-------------------------------------------------------------------------------------|-----------|-----------|-----------|
| 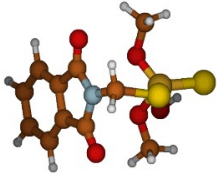 |           |           |           |  |           |           |           |  |           |           |           |  |           |           |           |
| C                                                                                 | 4.091672  | 1.546755  | 0.011494  | C                                                                                 | 4.032573  | 1.767508  | -0.501822 | C                                                                                   | 4.144849  | 1.094152  | 1.020914  | C                                                                                   | 4.183455  | 0.081157  | -1.462172 |
| C                                                                                 | 3.198208  | 1.128480  | 1.003258  | C                                                                                 | 3.128786  | 1.620404  | 0.555998  | C                                                                                   | 3.252341  | 0.152182  | 1.543613  | C                                                                                   | 3.238270  | 1.062727  | -1.145755 |
| C                                                                                 | 2.334728  | 0.097336  | 0.679200  | C                                                                                 | 2.356392  | 0.472601  | 0.569971  | C                                                                                   | 2.357715  | -0.426272 | 0.660157  | C                                                                                   | 2.293469  | 0.742077  | -0.186996 |
| C                                                                                 | 2.352300  | -0.505660 | -0.575037 | C                                                                                 | 2.472012  | -0.500084 | -0.418915 | C                                                                                   | 2.345193  | -0.093896 | -0.690734 | C                                                                                   | 2.280999  | -0.498278 | 0.441857  |
| C                                                                                 | 3.234823  | -0.104285 | -1.562269 | C                                                                                 | 3.365842  | -0.368449 | -1.466843 | C                                                                                   | 3.227041  | 0.831156  | -1.221215 | C                                                                                   | 3.213993  | -1.475445 | 0.142612  |
| C                                                                                 | 4.109571  | 0.941142  | -1.248665 | C                                                                                 | 4.148947  | 0.790448  | -1.495219 | C                                                                                   | 4.132905  | 1.427537  | -0.337118 | C                                                                                   | 4.171864  | -1.165739 | -0.829067 |
| C                                                                                 | 1.273409  | -0.554654 | 1.498200  | C                                                                                 | 1.309827  | 0.035407  | 1.537973  | C                                                                                   | 1.291907  | -1.440217 | 0.905715  | C                                                                                   | 1.170225  | 1.558121  | 0.359046  |
| N                                                                                 | 0.699440  | -1.526757 | 0.665668  | N                                                                                 | 0.849783  | -1.200623 | 1.062170  | N                                                                                   | 0.679765  | -1.652583 | -0.345069 | N                                                                                   | 0.528848  | 0.732382  | 1.301446  |
| C                                                                                 | 1.307853  | -1.569239 | -0.601990 | C                                                                                 | 1.510288  | -1.598395 | -0.114798 | C                                                                                   | 1.263665  | -0.876009 | -1.356382 | C                                                                                   | 1.142961  | -0.523015 | 1.406714  |
| C                                                                                 | -0.427216 | -2.323690 | 1.026564  | C                                                                                 | -0.230433 | -1.929524 | 1.644386  | C                                                                                   | -0.494133 | -2.453207 | -0.515297 | C                                                                                   | -0.692577 | 1.095338  | 1.956132  |
| S                                                                                 | -2.075925 | -1.448508 | 1.089851  | S                                                                                 | -1.931446 | -1.195090 | 1.433097  | S                                                                                   | -2.030774 | -1.545696 | -1.033652 | S                                                                                   | -2.180446 | 0.072160  | 1.530004  |
| P                                                                                 | -1.827547 | 0.207904  | -0.165879 | P                                                                                 | -1.792311 | -0.066845 | -0.324742 | P                                                                                   | -1.896205 | 0.215446  | 0.072346  | P                                                                                   | -1.931964 | -0.249931 | -0.521606 |
| O                                                                                 | -0.981813 | -0.281903 | -1.431396 | O                                                                                 | -0.879309 | -0.897039 | -1.339959 | O                                                                                   | -0.612630 | 1.020014  | -0.474509 | O                                                                                   | -0.615306 | -1.156175 | -0.689382 |
| C                                                                                 | -1.594601 | -1.131643 | -2.413377 | C                                                                                 | -1.401706 | -2.080125 | -1.964847 | C                                                                                   | -0.708093 | 1.707701  | -1.739454 | C                                                                                   | -0.696769 | -2.559267 | -0.392146 |
| O                                                                                 | 1.023069  | -2.348155 | -1.478860 | O                                                                                 | 1.318677  | -2.637635 | -0.697433 | O                                                                                   | 0.919260  | -0.878897 | -2.513480 | O                                                                                   | 0.786124  | -1.407714 | 2.146968  |
| O                                                                                 | 0.939168  | -0.346885 | 2.639658  | O                                                                                 | 0.903918  | 0.580856  | 2.535706  | O                                                                                   | 0.995043  | -2.007085 | 1.928131  | O                                                                                   | 0.857792  | 2.695010  | 0.103945  |
| S                                                                                 | -3.534281 | 1.060192  | -0.485758 | S                                                                                 | -3.552854 | 0.484466  | -0.885779 | S                                                                                   | -3.567397 | 1.166648  | 0.132128  | S                                                                                   | -3.554193 | -0.862140 | -1.345528 |
| O                                                                                 | -0.673653 | 1.121887  | 0.465490  | O                                                                                 | -0.699588 | 1.087552  | -0.047756 | O                                                                                   | -1.194812 | -0.195401 | 1.473404  | O                                                                                   | -1.232528 | 1.102425  | -1.077484 |
| C                                                                                 | -0.929425 | 1.868164  | 1.671071  | C                                                                                 | -1.018755 | 2.189919  | 0.777396  | C                                                                                   | -1.863687 | -0.989017 | 2.379896  | C                                                                                   | -1.934876 | 2.285754  | -1.107779 |
| H                                                                                 | -0.502102 | -3.134955 | 0.302252  | H                                                                                 | -0.228823 | -2.926342 | 1.202776  | H                                                                                   | -0.351359 | -3.185746 | -1.312630 | H                                                                                   | -0.599509 | 0.977486  | 3.037911  |
| H                                                                                 | -0.297053 | -2.714051 | 2.037372  | H                                                                                 | -0.102534 | -1.984936 | 2.727018  | H                                                                                   | -0.685848 | -2.951465 | 0.436654  | H                                                                                   | -0.896706 | 2.136175  | 1.699084  |
| H                                                                                 | 3.238357  | -0.581355 | -2.536613 | H                                                                                 | 3.447200  | -1.133605 | -2.231655 | H                                                                                   | 3.210179  | 1.078410  | -2.277856 | H                                                                                   | 3.197434  | -2.437204 | 0.645309  |
| H                                                                                 | 3.175826  | 1.589345  | 1.985394  | H                                                                                 | 3.032898  | 2.369731  | 1.335173  | H                                                                                   | 3.251125  | -0.114434 | 2.595237  | H                                                                                   | 3.236421  | 2.034078  | -1.628959 |
| H                                                                                 | 4.813877  | 1.291993  | -1.995788 | H                                                                                 | 4.859299  | 0.936632  | -2.302299 | H                                                                                   | 4.839054  | 2.162656  | -0.709079 | H                                                                                   | 4.920866  | -1.903852 | -1.097108 |
| H                                                                                 | 4.782610  | 2.356864  | 0.220620  | H                                                                                 | 4.654923  | 2.654787  | -0.554587 | H                                                                                   | 4.859036  | 1.577474  | 1.679430  | H                                                                                   | 4.940151  | 0.288387  | -2.211793 |
| H                                                                                 | -1.098068 | 1.178325  | 2.501611  | H                                                                                 | -1.596453 | 1.899725  | 1.659118  | H                                                                                   | -2.920192 | -0.794014 | 2.521558  | H                                                                                   | -2.976239 | 2.235789  | -1.403527 |
| H                                                                                 | -1.783223 | 2.532364  | 1.523775  | H                                                                                 | -1.646859 | 2.982289  | 0.154108  | H                                                                                   | -0.457393 | 2.826785  | 0.811486  | H                                                                                   | -1.297379 | 3.139862  | -1.279196 |
| H                                                                                 | -0.027765 | 2.453095  | 1.844543  | H                                                                                 | -0.084426 | 2.685066  | 1.038941  | H                                                                                   | -1.211254 | -1.378877 | 3.146290  | H                                                                                   | 0.301989  | -2.955310 | -0.573570 |
| H                                                                                 | -0.803426 | -1.384911 | -3.115966 | H                                                                                 | -0.568928 | -2.510634 | -2.517024 | H                                                                                   | 0.277441  | 2.140292  | -1.907927 | H                                                                                   | -0.965483 | -2.704450 | 0.658199  |
| H                                                                                 | -2.407752 | -0.596291 | -2.908496 | H                                                                                 | -2.223872 | -1.811770 | -2.631728 | H                                                                                   | -0.942166 | 0.991784  | -2.531720 | H                                                                                   | -1.424547 | -3.037935 | -1.051043 |
| H                                                                                 | -1.972288 | -2.043994 | -1.941943 | H                                                                                 | -1.745441 | -2.789560 | -1.205885 | H                                                                                   | -1.459410 | 2.496875  | -1.674018 |                                                                                     |           |           |           |
| O                                                                                 | -1.128809 | 3.534142  | -0.901480 | O                                                                                 | -2.413783 | 3.740071  | -0.669543 | O                                                                                   | -0.976708 | 3.638014  | 0.861847  |                                                                                     |           |           |           |
| H                                                                                 | -1.970205 | 3.046439  | -1.031707 | H                                                                                 | -2.992587 | 3.021428  | -0.993328 | H                                                                                   | -1.893189 | 3.333598  | 0.873546  |                                                                                     |           |           |           |

**Table S10.** Optimized Cartesian coordinates for the stationary points involved in the H28-abstraction pathway in gas phase calculated at the M06-2X/6-31+G(d,p) level of theory.

| MCR(H28-abs)                                                                      |           |           |           | TS(H28-abs)                                                                       |           |           |           | MCP(H28-abs)                                                                        |           |           |           | Rad(H28-abs)                                                                        |           |           |           |
|-----------------------------------------------------------------------------------|-----------|-----------|-----------|-----------------------------------------------------------------------------------|-----------|-----------|-----------|-------------------------------------------------------------------------------------|-----------|-----------|-----------|-------------------------------------------------------------------------------------|-----------|-----------|-----------|
| 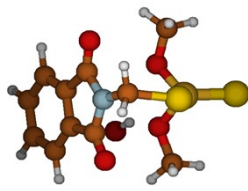 |           |           |           |  |           |           |           |  |           |           |           |  |           |           |           |
| C                                                                                 | 4.107170  | 1.086652  | -0.183221 | C                                                                                 | 4.178680  | 0.816036  | -0.549279 | C                                                                                   | 4.130889  | 0.570404  | -1.095883 | C                                                                                   | 4.183650  | 0.080516  | -1.462045 |
| C                                                                                 | 3.135789  | 1.054181  | 0.823958  | C                                                                                 | 3.237403  | 1.018893  | 0.466277  | C                                                                                   | 3.183707  | 1.228704  | -0.303444 | C                                                                                   | 3.238637  | 1.062330  | -1.145871 |
| C                                                                                 | 2.172934  | 0.063242  | 0.738766  | C                                                                                 | 2.231608  | 0.075906  | 0.587225  | C                                                                                   | 2.243739  | 0.438235  | 0.335761  | C                                                                                   | 2.293733  | 0.742002  | -0.187090 |
| C                                                                                 | 2.164569  | -0.862305 | -0.302431 | C                                                                                 | 2.156681  | -1.030363 | -0.254928 | C                                                                                   | 2.231088  | -0.946353 | 0.193524  | C                                                                                   | 2.281009  | -0.498230 | 0.442013  |
| C                                                                                 | 3.124504  | -0.843391 | -1.298798 | C                                                                                 | 3.085309  | -1.244339 | -1.258579 | C                                                                                   | 3.165731  | -1.607760 | -0.582709 | C                                                                                   | 3.213820  | -1.475619 | 0.142998  |
| C                                                                                 | 4.102878  | 0.153330  | -1.223033 | C                                                                                 | 4.104575  | -0.295424 | -1.395325 | C                                                                                   | 4.125122  | -0.821092 | -1.230581 | C                                                                                   | 4.171779  | -1.166265 | -0.828715 |
| C                                                                                 | 1.018067  | -0.227781 | 1.636063  | C                                                                                 | 1.088792  | 0.014897  | 1.543346  | C                                                                                   | 1.117915  | 0.822274  | 1.233643  | C                                                                                   | 1.170549  | 1.558265  | 0.358687  |
| N                                                                                 | 0.362783  | -1.325024 | 1.058947  | N                                                                                 | 0.381869  | -1.150095 | 1.211340  | N                                                                                   | 0.467941  | -0.371298 | 1.569428  | N                                                                                   | 0.528786  | 0.732778  | 1.301032  |
| C                                                                                 | 1.000323  | -1.773421 | -0.111801 | C                                                                                 | 0.968525  | -1.842425 | 0.137868  | C                                                                                   | 1.078656  | -1.486472 | 0.969885  | C                                                                                   | 1.142814  | -0.522574 | 1.406715  |
| C                                                                                 | -0.860882 | -1.869908 | 1.547382  | C                                                                                 | -0.839815 | -1.548190 | 1.833402  | C                                                                                   | -0.782122 | -0.412762 | 2.269883  | C                                                                                   | -0.692561 | 1.096093  | 1.955763  |
| S                                                                                 | -2.403954 | -0.872673 | 1.210795  | S                                                                                 | -2.344216 | -0.519925 | 1.439704  | S                                                                                   | -2.234914 | -1.009713 | 1.284811  | S                                                                                   | -2.180388 | 0.072459  | 1.530092  |
| P                                                                                 | -1.913598 | 0.410780  | -0.369908 | P                                                                                 | -1.939229 | 0.310337  | -0.440611 | P                                                                                   | -1.963398 | -0.051032 | -0.552156 | P                                                                                   | -1.932052 | -0.250127 | -0.521486 |
| O                                                                                 | -1.026762 | -0.424008 | -1.411746 | O                                                                                 | -1.185332 | -0.815922 | -1.292594 | O                                                                                   | -0.592406 | -0.613644 | -1.175073 | O                                                                                   | -0.615617 | -1.156591 | -0.689418 |
| C                                                                                 | -1.654997 | -1.418789 | -2.237035 | C                                                                                 | -1.923388 | -1.950425 | -1.773285 | C                                                                                   | -0.594786 | -1.905183 | -1.807220 | C                                                                                   | -0.697155 | -2.559564 | -0.391645 |
| O                                                                                 | 0.644542  | -2.720224 | -0.770588 | O                                                                                 | 0.569070  | -2.888643 | -0.312457 | O                                                                                   | 0.696985  | -2.624663 | 1.088754  | O                                                                                   | 0.785853  | -1.407086 | 2.147147  |
| O                                                                                 | 0.672490  | 0.318327  | 2.656090  | O                                                                                 | 0.787070  | 0.766760  | 2.438434  | O                                                                                   | 0.798166  | 1.918063  | 1.640049  | O                                                                                   | 0.858209  | 2.695152  | 0.103316  |
| S                                                                                 | -3.491648 | 1.312455  | -0.992392 | S                                                                                 | -3.514991 | 1.139052  | -1.162612 | S                                                                                   | -3.546264 | -0.129512 | -1.631786 | S                                                                                   | -3.554401 | -0.862011 | -1.345419 |
| O                                                                                 | -0.685438 | 1.330836  | 0.140173  | O                                                                                 | -0.631266 | 1.245063  | -0.250360 | O                                                                                   | -1.343683 | 1.407877  | -0.185624 | O                                                                                   | -1.232360 | 1.102145  | -1.077298 |
| C                                                                                 | -0.938471 | 2.377317  | 1.099381  | C                                                                                 | -0.750494 | 2.511789  | 0.374206  | C                                                                                   | -2.108809 | 2.326393  | 0.503726  | C                                                                                   | -1.934485 | 2.285605  | -1.108325 |
| H                                                                                 | -0.992334 | -2.851647 | 1.092362  | H                                                                                 | -1.038928 | -2.577587 | 1.534527  | H                                                                                   | -0.732125 | -1.113577 | 3.105855  | H                                                                                   | -0.599381 | 0.978650  | 3.037565  |
| H                                                                                 | -0.821268 | -1.944708 | 2.635278  | H                                                                                 | -0.746389 | -1.471177 | 2.918291  | H                                                                                   | -0.985748 | 0.598312  | 2.627280  | H                                                                                   | -0.896909 | 2.136747  | 1.698180  |
| H                                                                                 | 3.107290  | -1.568960 | -2.105148 | H                                                                                 | 3.017133  | -2.110415 | -1.908411 | H                                                                                   | 3.148132  | -2.688534 | -0.680781 | H                                                                                   | 3.197019  | -2.437304 | 0.645828  |
| H                                                                                 | 3.126872  | 1.775890  | 1.634142  | H                                                                                 | 3.272450  | 1.886260  | 1.116302  | H                                                                                   | 3.164842  | 2.309628  | -0.214940 | H                                                                                   | 3.236968  | 2.033562  | -1.629318 |
| H                                                                                 | 4.866901  | 0.212298  | -1.991016 | H                                                                                 | 4.851426  | -0.421050 | -2.172561 | H                                                                                   | 4.876220  | -1.297272 | -1.852484 | H                                                                                   | 4.920597  | -1.904605 | -1.096645 |
| H                                                                                 | 4.870258  | 1.857432  | -0.164250 | H                                                                                 | 4.979445  | 1.535433  | -0.686125 | H                                                                                   | 4.881716  | 1.151375  | -1.621143 | H                                                                                   | 4.940378  | 0.287445  | -2.211714 |
| H                                                                                 | -1.267471 | 1.936020  | 2.042992  | H                                                                                 | -0.730101 | 2.417889  | 1.462605  | H                                                                                   | -1.549750 | 3.211758  | 0.768688  | H                                                                                   | -1.296873 | 3.139423  | -1.280779 |
| H                                                                                 | -1.686179 | 3.066095  | 0.701208  | H                                                                                 | -1.593810 | 3.082535  | -0.019892 | H                                                                                   | -3.172402 | 2.337206  | 0.294463  | H                                                                                   | -2.976088 | 2.235595  | -1.403172 |
| H                                                                                 | 0.017076  | 2.882342  | 1.237244  | H                                                                                 | 0.241669  | 3.085887  | 0.063380  | H                                                                                   | 0.836188  | 3.221996  | 0.125447  | H                                                                                   | 0.301375  | -2.955900 | -0.573657 |
| H                                                                                 | -0.853996 | -1.860948 | -2.825721 | H                                                                                 | -1.190533 | -2.595332 | -2.253611 | H                                                                                   | 0.430685  | -2.069767 | -2.137028 | H                                                                                   | -0.965097 | -2.704319 | 0.658957  |
| H                                                                                 | -2.402680 | -0.946743 | -2.878015 | H                                                                                 | -2.686570 | -1.620818 | -2.481693 | H                                                                                   | -0.880703 | -2.675360 | -1.084744 | H                                                                                   | -1.425511 | -3.038317 | -1.049840 |
| H                                                                                 | -2.116655 | -2.188416 | -1.611792 | H                                                                                 | -2.386877 | -2.482157 | -0.936757 | H                                                                                   | -1.276093 | -1.901005 | -2.660600 |                                                                                     |           |           |           |
| O                                                                                 | 1.594174  | 2.420461  | -1.247790 | O                                                                                 | 1.403451  | 3.328368  | -0.591904 | O                                                                                   | 0.808174  | 3.471193  | -0.808897 |                                                                                     |           |           |           |
| H                                                                                 | 0.822949  | 1.870340  | -0.990247 | H                                                                                 | 1.402524  | 2.516916  | -1.134269 | H                                                                                   | 0.248613  | 2.798461  | -1.215242 |                                                                                     |           |           |           |

**Table S11.** Optimized Cartesian coordinates for the stationary points involved in the H29-abstraction pathway in gas phase calculated at the M06-2X/6-31+G(d,p) level of theory.

| MCR(H29-abs)                                                                      | TS(H29-abs)                                                                       | MCP(H29-abs)                                                                        | Rad(H29-abs)                                                                        |
|-----------------------------------------------------------------------------------|-----------------------------------------------------------------------------------|-------------------------------------------------------------------------------------|-------------------------------------------------------------------------------------|
| 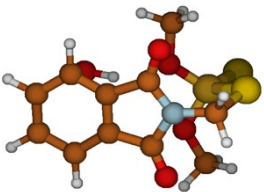 |  |  |  |
| C -4.102880 0.153461 -1.222922                                                    | C -4.105079 -0.296167 -1.395100                                                   | C -4.124463 -0.822369 -1.230550                                                     | C -4.171771 -1.166292 -0.828701                                                     |
| C -3.124467 -0.843210 -1.298861                                                   | C -3.085697 -1.244922 -1.258112                                                   | C -3.165117 -1.608520 -0.581984                                                     | C -3.213802 -1.475632 0.143005                                                      |
| C -2.164537 -0.862249 -0.302498                                                   | C -2.156936 -1.030423 -0.254694                                                   | C -2.230706 -0.946523 0.194014                                                      | C -2.280998 -0.498233 0.442010                                                      |
| C -2.172888 0.063102 0.738874                                                     | C -2.231838 0.076201 0.586996                                                     | C -2.243541 0.438159 0.335421                                                       | C -2.293742 0.741997 -0.187096                                                      |
| C -3.135789 1.053984 0.824224                                                     | C -3.237729 1.019050 0.465786                                                     | C -3.183438 1.228118 -0.304523                                                      | C -3.238662 1.062315 -1.145866                                                      |
| C -4.107182 1.086590 -0.182940                                                    | C -4.179152 0.815655 -0.549525                                                    | C -4.130375 0.569205 -1.096753                                                      | C -4.183664 0.080489 -1.462032                                                      |
| C -1.000273 -1.773379 -0.112090                                                   | C -0.968675 -1.842229 0.138303                                                    | C -1.078289 -1.486037 0.970780                                                      | C -1.142802 -0.522557 1.406712                                                      |
| N -0.362718 -1.325235 1.058747                                                    | N -0.381967 -1.149428 1.211448                                                    | N -0.467742 -0.370359 1.569719                                                      | N -0.528773 0.732789 1.301007                                                       |
| C -1.017991 -0.228086 1.636083                                                    | C -1.088967 0.015686 1.543002                                                     | C -1.117945 0.822824 2.233335                                                       | C -1.170565 1.558276 0.358672                                                       |
| C 0.861040 -1.870145 1.546945                                                     | C 0.839703 -1.547363 1.833642                                                     | C 0.782400 -0.411303 2.270118                                                       | C 0.692569 1.096122 1.955740                                                        |
| S 2.403913 -0.872417 1.210962                                                     | S 2.344011 -0.518876 1.440267                                                     | S 2.235099 -1.008705 1.285133                                                       | S 2.180396 0.072477 1.530089                                                        |
| P 1.913591 0.410870 -0.369804                                                     | P 1.939591 0.310119 -0.440724                                                     | P 1.963274 -0.051110 -0.552379                                                      | P 1.932059 -0.250138 -0.521485                                                      |
| O 0.685101 1.330594 0.140052                                                      | O 0.631493 1.244859 -0.251357                                                     | O 1.343073 1.407707 -0.186554                                                       | O 1.232351 1.102132 -1.077280                                                       |
| C 0.937686 2.377376 1.099055                                                      | C 0.750546 2.511763 0.372850                                                      | C 2.107532 2.326591 0.503102                                                        | C 1.934463 2.285598 -1.108357                                                       |
| O -0.672344 0.317855 2.656173                                                     | O -0.787079 0.767997 2.437684                                                     | O -0.798712 1.918899 1.639524                                                       | O -0.858241 2.695164 0.103299                                                       |
| O -0.644491 -2.720025 -0.771107                                                   | O -0.569176 -2.888589 -0.311652                                                   | O -0.696393 -2.624047 1.090388                                                      | O -0.785846 -1.407056 2.147162                                                      |
| S 3.491547 1.312983 -0.991957                                                     | S 3.515437 1.138572 -1.162842                                                     | S 3.546124 -0.129516 -1.632044                                                      | S 3.554412 -0.862011 -1.345420                                                      |
| O 1.027160 -0.424105 -1.411830                                                    | O 1.185998 -0.816737 -1.292172                                                    | O 0.592510 -0.614590 -1.174987                                                      | O 0.615625 -1.156602 -0.689409                                                      |
| C 1.655705 -1.418868 -2.236855                                                    | C 1.924210 -1.951510 -1.771966                                                    | C 0.595360 -1.906613 -1.806148                                                      | C 0.697148 -2.559569 -0.391611                                                      |
| H 0.821451 -1.945566 2.634801                                                     | H 0.746170 -1.470437 2.918533                                                     | H 0.985903 0.599969 2.627003                                                        | H 0.896919 2.136771 1.698136                                                        |
| H 0.992662 -2.851605 1.091374                                                     | H 1.038946 -2.576731 1.534755                                                     | H 0.732573 -1.111725 3.106434                                                       | H 0.599390 0.978698 3.037544                                                        |
| H -3.126935 1.775564 1.634524                                                     | H -3.272716 1.886731 1.115390                                                     | H -3.164656 2.309106 -0.216852                                                      | H -3.237011 2.033548 -1.629310                                                      |
| H -3.107209 -1.568664 -2.105314                                                   | H -3.017535 -2.111271 -1.907582                                                   | H -3.147367 -2.689351 -0.679387                                                     | H -3.196984 -2.437316 0.645838                                                      |
| H -4.870292 1.857345 -0.163806                                                    | H -4.979993 1.534928 -0.686571                                                    | H -4.881123 1.149774 -1.622571                                                      | H -4.940401 0.287406 -2.211696                                                      |
| H -4.866925 0.212542 -1.990874                                                    | H -4.852043 -0.422201 -2.172162                                                   | H -4.875389 -1.299017 -1.852301                                                     | H -4.920583 -1.904642 -1.096624                                                     |
| H 2.117428 -2.188318 -1.611434                                                    | H 2.386826 -2.483164 -0.934907                                                    | H 0.880822 -2.676200 -1.082865                                                      | H 0.965028 -2.704301 0.659011                                                       |
| H 2.403414 -0.946784 -2.877781                                                    | H 2.688103 -1.622258 -2.479777                                                    | H 1.277250 -1.903075 -2.659072                                                      | H 1.425547 -3.038333 -1.049749                                                      |
| H 0.854897 -1.861277 -2.825616                                                    | H 1.191635 -2.596350 -2.252807                                                    | H -0.429871 -2.071471 -2.136565                                                     | H -0.301369 -2.955913 -0.573677                                                     |
| H -0.018032 2.882150 1.236665                                                     | H -0.242161 3.085325 0.062618                                                     | H -0.838527 3.223858 0.125198                                                       | H 1.296841 3.139402 -1.280847                                                       |
| H 1.685252 3.066276 0.700831                                                      | H 1.593296 3.082840 -0.021974                                                     | H 1.547413 3.210820 0.769621                                                        | H 2.976074 2.235595 -1.403175                                                       |
| H 1.266685 1.936361 2.042799                                                      | H 0.730898 2.418168 1.461294                                                      | H 3.170940 2.339044 0.292978                                                        |                                                                                     |
| O -1.594444 2.420046 -1.248029                                                    | O -1.404046 3.327750 -0.592090                                                    | O -0.809676 3.470693 -0.809761                                                      |                                                                                     |
| H -0.822994 1.870190 -0.990586                                                    | H -1.402948 2.516842 -1.135266                                                    | H -0.247379 2.798464 -1.213149                                                      |                                                                                     |

**Table S12.** Optimized Cartesian coordinates for the stationary points involved in the H30-abstraction pathway in gas phase calculated at the M06-2X/6-31+G(d,p) level of theory.

| MCR(H30-abs)                                                                      | TS(H30-abs)                                                                       | MCP(H30-abs)                                                                        | Rad(H30-abs)                                                                        |
|-----------------------------------------------------------------------------------|-----------------------------------------------------------------------------------|-------------------------------------------------------------------------------------|-------------------------------------------------------------------------------------|
| 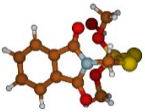 |  |  |  |
| C -4.126308 0.708015 -1.414371                                                    | C -4.253233 0.348784 -1.569689                                                    | C -4.192850 0.721552 -1.362376                                                      | C -4.171724 -1.166177 -0.828564                                                     |
| C -3.299637 -0.420647 -1.415542                                                   | C -3.505768 -0.724489 -1.072593                                                   | C -3.351789 -0.396301 -1.392745                                                     | C -3.213737 -1.475556 0.143107                                                      |
| C -2.400106 -0.544362 -0.371569                                                   | C -2.554604 -0.437628 -0.109663                                                   | C -2.438662 -0.526181 -0.361161                                                     | C -2.280827 -0.498221 0.442060                                                      |
| C -2.320900 0.406025 0.642165                                                     | C -2.349632 0.858763 0.353078                                                     | C -2.359931 0.406830 0.667667                                                       | C -2.293475 0.741983 -0.187095                                                      |
| C -3.135301 1.524488 0.656351                                                     | C -3.085164 1.927808 -0.127363                                                    | C -3.189080 1.513989 0.711814                                                       | C -3.238353 1.062290 -1.145891                                                      |
| C -4.044932 1.663806 -0.396991                                                    | C -4.046193 1.651516 -1.105616                                                    | C -4.112381 1.660128 -0.328935                                                      | C -4.183476 0.080554 -1.461987                                                      |
| C -1.388284 -1.605525 -0.100458                                                   | C -1.602249 -1.343364 0.595289                                                    | C -1.411144 -1.580005 -0.118660                                                     | C -1.142713 -0.522574 1.406834                                                      |
| N -0.748312 -1.219844 1.086311                                                    | N -0.868971 -0.519306 1.460839                                                    | N -0.766587 -1.214047 1.071753                                                      | N -0.528711 0.732863 1.301131                                                       |
| C -1.266211 -0.019173 1.606151                                                    | C -1.267350 0.827599 1.378281                                                     | C -1.287274 -0.021453 1.610904                                                      | C -1.170326 1.558314 0.358720                                                       |
| C 0.357355 -1.915071 1.658031                                                     | C 0.227962 -0.968370 2.257000                                                     | C 0.379702 -1.879444 1.611073                                                       | C 0.692679 1.096119 1.955785                                                        |
| S 2.007435 -1.692629 0.807785                                                     | S 1.772331 -1.457914 1.333938                                                     | S 1.894156 -1.899633 0.534381                                                       | S 2.180713 0.073180 1.529815                                                        |
| P 1.791159 0.053649 -0.325889                                                     | P 1.708361 -0.303218 -0.410938                                                    | P 1.849754 -0.004002 -0.330287                                                      | P 1.931862 -0.250095 -0.521593                                                      |
| O 1.035312 1.134020 0.576137                                                      | O 1.159670 1.143648 0.025840                                                      | O 1.242863 0.980080 0.810084                                                        | O 1.232550 1.101941 -1.078241                                                       |
| C 1.679738 1.691259 1.736572                                                      | C 1.968108 2.026588 0.776872                                                      | C 1.969080 1.246598 1.955148                                                        | C 1.934543 2.285502 -1.108599                                                       |
| O -0.912369 0.493283 2.639423                                                     | O -0.813449 1.724899 2.045409                                                     | O -0.922841 0.491082 2.640103                                                       | O -0.857917 2.695115 0.103113                                                       |
| O -1.133788 -2.609005 -0.722073                                                   | O -1.451278 -2.536731 0.491165                                                    | O -1.146493 -2.559279 -0.773430                                                     | O -0.785630 -1.407057 2.147223                                                      |
| S 3.499211 0.550946 -1.086430                                                     | S 3.393344 -0.420434 -1.341805                                                    | S 3.539816 0.463904 -1.122833                                                       | H 0.896569 2.136968 1.698596                                                        |
| O 0.581477 -0.184902 -1.350532                                                    | O 0.387687 -0.734102 -1.211004                                                    | O 0.545806 0.073703 -1.263528                                                       | H 0.599527 0.978407 3.037575                                                        |
| C 0.782673 -1.036330 -2.490744                                                    | C 0.378590 -1.981525 -1.926103                                                    | C 0.562210 -0.579137 -2.544984                                                      | S 3.553877 -0.863020 -1.345347                                                      |
| H 0.466050 -1.576785 2.688663                                                     | H 0.480044 -0.163953 2.948501                                                     | H 0.627343 -1.383569 2.551336                                                       | O 0.615070 -1.156299 -0.688530                                                      |
| H 0.176665 -2.990270 1.615776                                                     | H -0.048410 -1.873818 2.800579                                                    | H 0.170740 -2.938557 1.776172                                                       | C 0.696619 -2.559361 -0.391193                                                      |
| H -3.061130 2.259794 1.450508                                                     | H -2.914545 2.934050 0.240499                                                     | H -3.117009 2.234731 1.519531                                                       | H -3.236632 2.033520 -1.629337                                                      |
| H -3.355569 -1.170616 -2.197895                                                   | H -3.660462 -1.740482 -1.421358                                                   | H -3.408105 -1.134331 -2.186509                                                     | H -3.197071 -2.437185 0.646049                                                      |
| H -4.698597 2.529287 -0.428551                                                    | H -4.642362 2.461117 -1.513665                                                    | H -4.778568 2.516550 -0.336878                                                      | H -4.940244 0.287518 -2.211610                                                      |
| H -4.843547 0.847011 -2.216721                                                    | H -5.007900 0.169720 -2.328595                                                    | H -4.921802 0.864720 -2.153347                                                      | H -4.920688 -1.904422 -1.096351                                                     |
| H 1.020431 -2.051622 -2.162083                                                    | H 0.525818 -2.812060 -1.230326                                                    | H 0.694764 -1.656570 -2.412413                                                      | H 0.965798 -2.704431 0.659045                                                       |
| H 1.579359 -0.631987 -3.118769                                                    | H 1.153040 -1.972521 -2.695843                                                    | H 1.356262 -0.159081 -3.165967                                                      | H 1.424040 -3.038152 -1.050393                                                      |
| H -0.166061 -1.038395 -3.025355                                                   | H -0.610592 -2.052261 -2.376559                                                   | H -0.413858 -0.379528 -2.985659                                                     | H -0.302250 -2.955388 -0.572075                                                     |
| H 1.012048 2.472816 2.091768                                                      | H 1.310286 2.773897 1.217917                                                      | H 1.370502 1.720691 2.718159                                                        | H 1.296771 3.139346 -1.280335                                                       |
| H 2.647248 2.114355 1.458224                                                      | H 2.702364 2.602714 0.041293                                                      | H 1.209559 3.035576 -0.096481                                                       | H 2.975953 2.235745 -1.404244                                                       |
| H 1.793044 0.918855 2.501593                                                      | H 2.579113 1.505009 1.519745                                                      | H 3.033989 1.407168 1.834462                                                        |                                                                                     |
| O 1.718238 3.508031 -0.702776                                                     | O 3.555601 3.042092 -0.917003                                                     | O 1.890278 3.633555 -0.424915                                                       |                                                                                     |
| H 2.355041 2.872331 -1.093708                                                     | H 3.771547 2.173031 -1.310333                                                     | H 2.568252 3.049643 -0.788196                                                       |                                                                                     |

**Table S13.** Optimized Cartesian coordinates for the stationary points involved in the H31-abstraction pathway in gas phase calculated at the M06-2X/6-31+G(d,p) level of theory.

| MCR(H31-abs)                                                                                                                                                                                                                                                                                                                                                                                                                                                                                                                                                                                                                                                                                                                                                                                                                                                                                                                                                                                                                                                                                                                                 | TS(H31-abs)                                                                                                                                                                                                                                                                                                                                                                                                                                                                                                                                                                                                                                                                                                                                                                                                                                                                                                                                                                                                                                                                                                                                    | MCP(H31-abs)                                                                                                                                                                                                                                                                                                                                                                                                                                                                                                                                                                                                                                                                                                                                                                                                                                                                                                                                                                                                                                                                                                                               | Rad(H31-abs)                                                                                                                                                                                                                                                                                                                                                                                                                                                                                                                                                                                                                                                                                                                                                                                                                                                                                                                                                                                                                                |
|----------------------------------------------------------------------------------------------------------------------------------------------------------------------------------------------------------------------------------------------------------------------------------------------------------------------------------------------------------------------------------------------------------------------------------------------------------------------------------------------------------------------------------------------------------------------------------------------------------------------------------------------------------------------------------------------------------------------------------------------------------------------------------------------------------------------------------------------------------------------------------------------------------------------------------------------------------------------------------------------------------------------------------------------------------------------------------------------------------------------------------------------|------------------------------------------------------------------------------------------------------------------------------------------------------------------------------------------------------------------------------------------------------------------------------------------------------------------------------------------------------------------------------------------------------------------------------------------------------------------------------------------------------------------------------------------------------------------------------------------------------------------------------------------------------------------------------------------------------------------------------------------------------------------------------------------------------------------------------------------------------------------------------------------------------------------------------------------------------------------------------------------------------------------------------------------------------------------------------------------------------------------------------------------------|--------------------------------------------------------------------------------------------------------------------------------------------------------------------------------------------------------------------------------------------------------------------------------------------------------------------------------------------------------------------------------------------------------------------------------------------------------------------------------------------------------------------------------------------------------------------------------------------------------------------------------------------------------------------------------------------------------------------------------------------------------------------------------------------------------------------------------------------------------------------------------------------------------------------------------------------------------------------------------------------------------------------------------------------------------------------------------------------------------------------------------------------|---------------------------------------------------------------------------------------------------------------------------------------------------------------------------------------------------------------------------------------------------------------------------------------------------------------------------------------------------------------------------------------------------------------------------------------------------------------------------------------------------------------------------------------------------------------------------------------------------------------------------------------------------------------------------------------------------------------------------------------------------------------------------------------------------------------------------------------------------------------------------------------------------------------------------------------------------------------------------------------------------------------------------------------------|
| 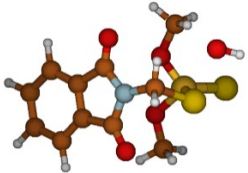                                                                                                                                                                                                                                                                                                                                                                                                                                                                                                                                                                                                                                                                                                                                                                                                                                                                                                                                                                                                                                                            |                                                                                                                                                                                                                                                                                                                                                                                                                                                                                                                                                                                                                                                                                                                                                                                                                                                                                                                                                                                                                                                               |                                                                                                                                                                                                                                                                                                                                                                                                                                                                                                                                                                                                                                                                                                                                                                                                                                                                                                                                                                                                                                                         |                                                                                                                                                                                                                                                                                                                                                                                                                                                                                                                                                                                                                                                                                                                                                                                                                                                                                                                                                          |
| C -4.526205 -0.940522 -0.390739<br>C -3.540664 -1.126440 0.584620<br>C -2.490248 -0.225684 0.598953<br>C -2.413678 0.824073 -0.310207<br>C -3.384720 1.021892 -1.276023<br>C -4.449335 0.115082 -1.304806<br>C -1.298455 -0.158316 1.493876<br>N -0.565254 0.956022 1.065503<br>C -1.175351 1.606212 -0.024656<br>C 0.720785 1.321369 1.574415<br>S 2.052572 0.054790 1.330210<br>P 1.625316 -0.717671 -0.587259<br>O 0.984762 0.482991 -1.419292<br>C 1.818951 1.543171 -1.927497<br>O -0.760646 2.603332 -0.560572<br>O -0.985326 -0.880653 2.409947<br>S 3.155630 -1.654920 -1.280966<br>O 0.256758 -1.538729 -0.405230<br>C 0.280032 -2.803281 0.273424<br>H 1.030777 2.243232 1.080942<br>H 0.688638 1.459952 2.656901<br>H -3.313655 1.845238 -1.978932<br>H -3.590908 -1.938246 1.303132<br>H -5.231084 0.230780 -2.048441<br>H -5.366954 -1.624871 -0.440037<br>H 0.605540 -2.666667 1.308755<br>H 0.938322 -3.497830 -0.253294<br>H -0.747994 -3.163501 0.257320<br>H 1.132152 2.252584 -2.385514<br>H 2.512636 1.135644 -2.666566<br>H 2.366465 2.018309 -1.108919<br>O 3.464606 2.165509 0.985270<br>H 4.293966 1.655425 1.008001 | C -4.505791 -0.778169 -0.689841<br>C -3.576963 -1.146905 0.289295<br>C -2.506401 -0.294639 0.495443<br>C -2.356884 0.881547 -0.231763<br>C -3.270853 1.259678 -1.199584<br>C -4.355110 0.404120 -1.421450<br>C -1.360156 -0.407610 1.443597<br>N -0.577322 0.734467 1.230650<br>C -1.113779 1.566641 0.228734<br>C 0.685389 0.976119 1.858008<br>S 2.027799 -0.250960 1.466020<br>P 1.668160 -0.712626 -0.547006<br>O 1.084965 0.637558 -1.205626<br>C 1.929798 1.708158 -1.559847<br>O -0.642899 2.617142 -0.129273<br>O -1.111979 -1.275206 2.246544<br>S 3.201769 -1.545380 -1.352262<br>O 0.269814 -1.500322 -0.578722<br>C 0.222928 -2.855780 -0.103491<br>H 1.030953 1.965549 1.550935<br>H 0.591488 0.913899 2.944128<br>H -3.143073 2.180368 -1.759122<br>H -3.685435 -2.058763 0.867750<br>H -5.094168 0.660380 -2.173530<br>H -5.359904 -1.418233 -0.885938<br>H 0.503809 -2.891666 0.952835<br>H 0.882843 -3.483937 -0.706085<br>H -0.813995 -3.169681 -0.217363<br>H 1.304616 2.481220 -2.003863<br>H 2.753130 1.381813 -2.199864<br>H 2.396249 2.208914 -0.601663<br>O 3.103783 2.734712 0.492423<br>H 3.596715 1.929678 0.744840 | C -4.385640 -0.975766 -0.694214<br>C -3.464033 -1.286194 0.311649<br>C -2.417419 -0.401430 0.501367<br>C -2.284804 0.750712 -0.267050<br>C -3.192376 1.072007 -1.260674<br>C -4.252170 0.182384 -1.466467<br>C -1.284955 -0.446287 1.469033<br>N -0.520347 0.706898 1.213706<br>C -1.067857 1.482553 0.186473<br>C 0.694986 1.002084 1.904477<br>S 2.234902 0.141635 1.278074<br>P 1.708622 -0.754847 -0.533270<br>O 0.899351 0.367612 -1.388789<br>C 1.578808 1.410340 -1.971331<br>O -0.628589 2.538316 -0.211470<br>O -1.030777 -1.258388 2.324112<br>S 3.251971 -1.554754 -1.349683<br>O 0.420484 -1.674115 -0.273827<br>C 0.590929 -2.932330 0.401509<br>H 0.902896 2.070879 1.837329<br>H 0.596127 0.673861 2.939672<br>H -3.079568 1.975244 -1.850992<br>H -3.559844 -2.179130 0.920727<br>H -4.985584 0.392833 -2.237927<br>H -5.220596 -1.643607 -0.879534<br>H 0.975629 -2.766210 1.411271<br>H 1.265172 -3.571000 -0.172928<br>H -0.403616 -3.371783 0.458249<br>H 0.916680 2.157412 -2.383476<br>H 2.559138 1.194468 -2.381531<br>H 1.170131 3.441414 0.097451<br>O 2.009030 3.585056 0.559075<br>H 2.637749 2.993683 0.129075 | C -4.171689 -1.166266 -0.828079<br>C -3.213884 -1.475208 0.143904<br>C -2.280840 -0.497848 0.442357<br>C -2.293201 0.741973 -0.187537<br>C -3.237936 1.061874 -1.146616<br>C -4.183175 0.080101 -1.462235<br>C -1.142830 -0.521882 1.407249<br>N -0.528713 0.733417 1.301094<br>C -1.169992 1.558445 0.357913<br>C 0.692674 1.096713 1.955616<br>S 2.180693 0.073574 1.529653<br>P 1.931740 -0.250343 -0.521608<br>O 1.232799 1.101625 -1.078885<br>C 1.934818 2.285195 -1.108456<br>O -0.857456 2.695089 0.101948<br>O -0.786132 -1.406037 2.148234<br>S 3.553714 -0.863999 -1.344950<br>O 0.614778 -1.156365 -0.688323<br>C 0.696089 -2.559399 -0.390952<br>H 0.896645 2.137509 1.698312<br>H 0.599592 0.979058 3.037412<br>H -3.236023 2.032820 -1.630633<br>H -3.197376 -2.436547 0.647407<br>H -4.939828 0.286768 -2.212054<br>H -4.920720 -1.904566 -1.095522<br>H 0.964943 -2.704505 0.659370<br>H 1.423736 -3.038286 -1.049843<br>H -0.302727 -2.955357 -0.572248<br>H 1.297331 3.139015 -1.281313<br>H 2.976682 2.235425 -1.402490 |

**Table S14.** Optimized Cartesian coordinates for the stationary points involved in the C1-addition pathway in gas phase calculated at the M06-2X/6-31+G(d,p) level of theory.

| MCR(C1-add)                                                                                                                                                                                                                                                                                                                                                                                                                                                                                                                                                                                                                                                                                                                                                                                                                                                                                                                                                                                                                                                                                                                                    | TS(C1-add)                                                                                                                                                                                                                                                                                                                                                                                                                                                                                                                                                                                                                                                                                                                                                                                                                                                                                                                                                                                                                                                                                                                                       | Adduct(C1-add)                                                                                                                                                                                                                                                                                                                                                                                                                                                                                                                                                                                                                                                                                                                                                                                                                                                                                                                                                                                                                                                                                                                                    |
|------------------------------------------------------------------------------------------------------------------------------------------------------------------------------------------------------------------------------------------------------------------------------------------------------------------------------------------------------------------------------------------------------------------------------------------------------------------------------------------------------------------------------------------------------------------------------------------------------------------------------------------------------------------------------------------------------------------------------------------------------------------------------------------------------------------------------------------------------------------------------------------------------------------------------------------------------------------------------------------------------------------------------------------------------------------------------------------------------------------------------------------------|--------------------------------------------------------------------------------------------------------------------------------------------------------------------------------------------------------------------------------------------------------------------------------------------------------------------------------------------------------------------------------------------------------------------------------------------------------------------------------------------------------------------------------------------------------------------------------------------------------------------------------------------------------------------------------------------------------------------------------------------------------------------------------------------------------------------------------------------------------------------------------------------------------------------------------------------------------------------------------------------------------------------------------------------------------------------------------------------------------------------------------------------------|---------------------------------------------------------------------------------------------------------------------------------------------------------------------------------------------------------------------------------------------------------------------------------------------------------------------------------------------------------------------------------------------------------------------------------------------------------------------------------------------------------------------------------------------------------------------------------------------------------------------------------------------------------------------------------------------------------------------------------------------------------------------------------------------------------------------------------------------------------------------------------------------------------------------------------------------------------------------------------------------------------------------------------------------------------------------------------------------------------------------------------------------------|
| 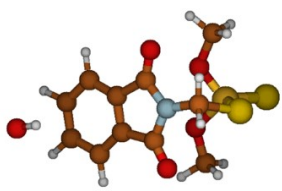                                                                                                                                                                                                                                                                                                                                                                                                                                                                                                                                                                                                                                                                                                                                                                                                                                                                                                                                                                                                                                                              |                                                                                                                                                                                                                                                                                                                                                                                                                                                                                                                                                                                                                                                                                                                                                                                                                                                                                                                                                                                                                                                                |                                                                                                                                                                                                                                                                                                                                                                                                                                                                                                                                                                                                                                                                                                                                                                                                                                                                                                                                                                                                                                                                |
| C -3.769649 -1.090537 -1.135200<br>C -2.850875 -1.528833 -0.173084<br>C -1.949098 -0.597030 0.308113<br>C -1.950250 0.722819 -0.137272<br>C -2.852740 1.169610 -1.085849<br>C -3.770008 0.236035 -1.584410<br>C -0.851400 -0.753105 1.306999<br>N -0.248388 0.508217 1.403781<br>C -0.860841 1.458707 0.568933<br>C 0.926124 0.776542 2.172656<br>S 2.514184 0.041509 1.533981<br>P 2.197985 -0.180771 -0.531604<br>O 1.384741 1.116104 -1.004800<br>C 2.051913 2.384450 -1.076067<br>O -0.553842 2.623822 0.501393<br>O -0.517147 -1.727102 1.936987<br>S 3.852573 -0.621560 -1.406327<br>O 0.968620 -1.203120 -0.695013<br>C 1.190930 -2.602903 -0.462332<br>H 1.041455 1.859526 2.222734<br>H 0.819049 0.352919 3.172897<br>H -2.844627 2.200169 -1.424750<br>H -2.844786 -2.552599 0.186787<br>H -4.501774 0.543131 -2.323754<br>H -4.502399 -1.783485 -1.534391<br>H 1.508471 -2.764989 0.571500<br>H 1.937588 -2.981896 -1.163507<br>H 0.228131 -3.084846 -0.628278<br>H 1.279128 3.109384 -1.324236<br>H 2.826361 2.351721 -1.845657<br>H 2.493581 2.636109 -0.106799<br>O -5.927875 0.083581 0.168692<br>H -5.259994 0.348906 0.829566 | C -3.883321 -0.775731 -1.118130<br>C -2.942674 -1.313959 -0.196176<br>C -1.999481 -0.455072 0.317514<br>C -1.925385 0.883818 -0.078900<br>C -2.793780 1.421178 -1.018457<br>C -3.754246 0.570238 -1.557652<br>C -0.905633 -0.711013 1.299973<br>N -0.233875 0.511345 1.440909<br>C -0.796158 1.527491 0.649995<br>C 0.958911 0.682806 2.209355<br>S 2.504446 -0.093157 1.515382<br>P 2.150882 -0.230152 -0.551765<br>O 1.397238 1.120001 -0.972642<br>C 2.127217 2.354883 -1.014013<br>O -0.424968 2.675909 0.625149<br>O -0.620137 -1.725895 1.886923<br>S 3.771742 -0.721271 -1.461894<br>O 0.870449 -1.185019 -0.731821<br>C 1.027833 -2.600778 -0.545497<br>H 1.128120 1.754690 2.313875<br>H 0.838541 0.212775 3.187011<br>H -2.709491 2.457864 -1.326255<br>H -2.999044 -2.351378 0.115494<br>H -4.453957 0.937087 -2.300366<br>H -4.509530 -1.451738 -1.686635<br>H 1.351879 -2.810067 0.477740<br>H 1.745278 -2.992663 -1.269623<br>H 0.040676 -3.030894 -0.710614<br>H 1.389828 3.125224 -1.231098<br>H 2.890711 2.306463 -1.793633<br>H 2.590864 2.554335 -0.042952<br>O -5.462661 -0.558974 0.089941<br>H -5.108009 0.080673 0.732953 | C -3.999441 -0.770715 -0.869924<br>C -2.972861 -1.179564 0.154057<br>C -1.991917 -0.318308 0.492419<br>C -1.887119 0.992004 -0.054603<br>C -2.838991 1.483383 -0.970215<br>C -3.847388 0.650056 -1.358090<br>C -0.863161 -0.497823 1.456338<br>N -0.154203 0.705372 1.426585<br>C -0.722900 1.656775 0.547739<br>C 1.082170 0.917538 2.110081<br>S 2.554466 -0.016311 1.451243<br>P 2.108052 -0.334131 -0.577003<br>O 1.398858 1.004428 -1.097354<br>C 2.178617 2.194766 -1.281440<br>O -0.305761 2.783088 0.393044<br>O -0.582336 -1.451932 2.141880<br>S 3.661510 -0.991820 -1.500580<br>O 0.778222 -1.237702 -0.613072<br>C 0.878164 -2.633538 -0.289066<br>H 1.299585 1.984904 2.065691<br>H 0.997034 0.581669 3.145240<br>H -2.764566 2.500958 -1.339867<br>H -3.055259 -2.166868 0.600062<br>H -4.612543 0.985265 -2.051868<br>H -3.908287 -1.443012 -1.737623<br>H 1.545596 -3.131521 -0.995666<br>H 1.234603 -2.75467 0.737506<br>H -0.134109 -3.027918 -0.371996<br>H 1.466355 2.974991 -1.542334<br>H 2.689777 2.461224 -0.351080<br>H 2.907299 2.038758 -2.080030<br>O -5.322897 -1.012832 -0.400642<br>H -5.482210 -0.446389 0.365626 |



**Table S15.** Optimized Cartesian coordinates for the stationary points involved in the C2-addition pathway in gas phase calculated at the M06-2X/6-31+G(d,p) level of theory.

| MCR(C2-add)                                                                       | TS(C2-add)                                                                          | Adduct(C2-add)                                                                      |
|-----------------------------------------------------------------------------------|-------------------------------------------------------------------------------------|-------------------------------------------------------------------------------------|
| 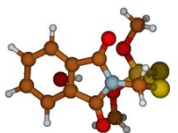 |  |  |
| C 4.107716 1.086124 -0.181873                                                     | C -4.041083 -0.864769 -0.668856                                                     | C -3.880759 -0.806566 -0.952519                                                     |
| C 3.136007 1.053190 0.824980                                                      | C -3.068303 -1.194137 0.320195                                                      | C -2.933004 -1.309781 0.110923                                                      |
| C 2.172972 0.062502 0.738873                                                      | C -2.131749 -0.185430 0.612050                                                      | C -2.062697 -0.197881 0.584661                                                      |
| C 2.164799 -0.862339 -0.302948                                                    | C -2.069021 0.989851 -0.121691                                                      | C -2.018023 1.035427 -0.014218                                                      |
| C 3.125028 -0.842968 -1.299023                                                    | C -2.983366 1.279284 -1.123199                                                      | C -2.883704 1.415466 -1.041386                                                      |
| C 4.103584 0.153497 -1.222311                                                     | C -3.981608 0.324896 -1.380694                                                      | C -3.834655 0.446887 -1.484819                                                      |
| C 1.017813 -0.229034 1.635646                                                     | C -1.020304 -0.186254 1.602247                                                      | C -0.990609 -0.276601 1.597628                                                      |
| N 0.362673 -1.325952 1.057689                                                     | N -0.323374 1.013268 1.379581                                                       | N -0.289775 0.946892 1.502378                                                       |
| C 1.000416 -1.773470 -0.113289                                                    | C -0.907104 1.788514 0.367307                                                       | C -0.866398 1.800709 0.560775                                                       |
| C -0.861491 -1.870883 1.544978                                                    | C 0.902010 1.347727 2.025730                                                        | C 0.959821 1.185545 2.139620                                                        |
| S -2.403238 -0.870258 1.213121                                                    | S 2.454620 0.617077 1.277678                                                        | S 2.478550 0.569544 1.225560                                                        |
| P -1.913935 0.411214 -0.369418                                                    | P 1.878113 -0.328283 -0.506428                                                      | P 1.819155 -0.314016 -0.562602                                                      |
| O -1.030117 -0.425914 -1.411946                                                   | O 0.929916 0.689924 -1.306525                                                       | O 0.815995 0.721816 -1.270650                                                       |
| C -1.661013 -1.421338 -2.234343                                                   | C 1.511746 1.837898 -1.945475                                                       | C 1.350616 1.902170 -1.891616                                                       |
| O 0.644736 -2.719684 -0.772984                                                    | O -0.519090 2.876262 0.016052                                                       | O -0.479135 2.912880 0.292077                                                       |
| O 0.671890 0.316545 2.655828                                                      | O -0.735211 -1.000821 2.445615                                                      | O -0.717799 -1.154220 2.382242                                                      |
| S -3.491508 1.315110 -0.989947                                                    | S 3.441761 -1.014453 -1.388778                                                      | S 3.346187 -0.928441 -1.556501                                                      |
| O -0.683530 1.329630 0.138098                                                     | O 0.700804 -1.363657 -0.141886                                                      | O 0.679249 -1.388432 -0.192694                                                      |
| C -0.933599 2.378248 1.095779                                                     | C 1.021195 -2.574362 0.574931                                                       | C 1.052879 -2.603045 0.490213                                                       |
| H -0.994212 -2.850888 1.086591                                                    | H 1.019679 2.430916 1.997342                                                        | H 1.094844 2.260587 2.258251                                                        |
| H -0.821628 -1.949665 2.632604                                                    | H 0.873953 0.979705 3.051747                                                        | H 0.966216 0.676136 3.103234                                                        |
| H 3.107903 -1.568056 -2.105809                                                    | H -2.924765 2.209635 -1.678277                                                      | H -2.817424 2.400426 -1.489001                                                      |
| H 3.127084 1.774337 1.635668                                                      | H -3.229681 -2.010087 1.013552                                                      | H -3.497258 -1.752319 0.942020                                                      |
| H 4.867871 0.212819 -1.990002                                                     | H -4.720647 0.519948 -2.150417                                                      | H -4.522033 0.714742 -2.280839                                                      |
| H 4.870980 1.856712 -0.162120                                                     | H -4.813781 -1.590988 -0.895289                                                     | H -4.588510 -1.536270 -1.334076                                                     |
| H -1.263719 1.939186 2.040053                                                     | H 1.413909 -2.322743 1.563147                                                       | H 1.720753 -3.186479 -0.146972                                                      |
| H -1.679492 3.068451 0.696683                                                     | H 1.746259 -3.155755 0.001686                                                       | H 1.535070 -2.360199 1.440478                                                       |
| H 0.023334 2.880902 1.232727                                                      | H 0.076565 -3.107666 0.671187                                                       | H 0.117303 -3.128458 0.676370                                                       |
| H -0.861270 -1.867169 -2.821962                                                   | H 0.682671 2.368493 -2.409890                                                       | H 0.495403 2.425208 -2.316323                                                       |
| H -2.407677 -0.949168 -2.876429                                                   | H 2.238918 1.514949 -2.693682                                                       | H 1.829352 2.536143 -1.140433                                                       |
| H -2.124671 -2.188070 -1.606984                                                   | H 1.985035 2.482712 -1.199818                                                       | H 2.061811 1.620043 -2.670989                                                       |
| O 1.595089 2.420201 -1.248924                                                     | O -1.972884 -2.411757 -0.779032                                                     | O -2.145313 -2.390195 -0.396143                                                     |
| H 0.823810 1.869042 -0.993737                                                     | H -1.221041 -1.828651 -1.003400                                                     | H -1.434975 -2.013989 -0.938526                                                     |

**Table S16.** Optimized Cartesian coordinates for the stationary points involved in the C3-addition pathway in gas phase calculated at the M06-2X/6-31+G(d,p) level of theory.

| MCR(C3-add)                                                                                                                                                                                                                                                                                                                                                                                                                                                                                                                                                                                                                                                                                                                                                                                                                                                                                                                                                                                                                                                                                                                                    | TS(C3-add)                                                                                                                                                                                                                                                                                                                                                                                                                                                                                                                                                                                                                                                                                                                                                                                                                                                                                                                                                                                                                                                                                                                                         | Adduct(C3-add)                                                                                                                                                                                                                                                                                                                                                                                                                                                                                                                                                                                                                                                                                                                                                                                                                                                                                                                                                                                                                                                                                                                                      |
|------------------------------------------------------------------------------------------------------------------------------------------------------------------------------------------------------------------------------------------------------------------------------------------------------------------------------------------------------------------------------------------------------------------------------------------------------------------------------------------------------------------------------------------------------------------------------------------------------------------------------------------------------------------------------------------------------------------------------------------------------------------------------------------------------------------------------------------------------------------------------------------------------------------------------------------------------------------------------------------------------------------------------------------------------------------------------------------------------------------------------------------------|----------------------------------------------------------------------------------------------------------------------------------------------------------------------------------------------------------------------------------------------------------------------------------------------------------------------------------------------------------------------------------------------------------------------------------------------------------------------------------------------------------------------------------------------------------------------------------------------------------------------------------------------------------------------------------------------------------------------------------------------------------------------------------------------------------------------------------------------------------------------------------------------------------------------------------------------------------------------------------------------------------------------------------------------------------------------------------------------------------------------------------------------------|-----------------------------------------------------------------------------------------------------------------------------------------------------------------------------------------------------------------------------------------------------------------------------------------------------------------------------------------------------------------------------------------------------------------------------------------------------------------------------------------------------------------------------------------------------------------------------------------------------------------------------------------------------------------------------------------------------------------------------------------------------------------------------------------------------------------------------------------------------------------------------------------------------------------------------------------------------------------------------------------------------------------------------------------------------------------------------------------------------------------------------------------------------|
| 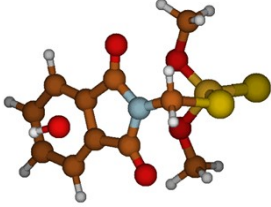 <pre> C -3.819999 -1.670595 -1.023694 C -2.948054 -1.726152 0.068299 C -2.091682 -0.652642 0.247539 C -2.095708 0.439420 -0.616413 C -2.956726 0.507239 -1.699064 C -3.823914 -0.572555 -1.892715 C -1.064954 -0.408576 1.305100 N -0.499665 0.833997 0.998354 C -1.078073 1.422433 -0.136433 C 0.577640 1.421669 1.727162 S 2.249336 0.629925 1.496960 P 2.135011 -0.300357 -0.382572 O 1.326080 0.699736 -1.337600 C 1.947725 1.915095 -1.778269 O -0.795024 2.506996 -0.582098 O -0.752943 -1.099712 2.243756 S 3.880453 -0.901524 -0.924937 O 0.966258 -1.399366 -0.280211 C 1.217089 -2.613912 0.443784 H 0.645941 2.466494 1.423641 H 0.385886 1.340972 2.798643 H -2.951258 1.365632 -2.362556 H -2.938555 -2.567562 0.753623 H -4.512502 -0.563136 -2.731432 H -4.506265 -2.491733 -1.204099 H 1.429918 -2.387538 1.492254 H 2.047613 -3.155197 -0.014788 H 0.296700 -3.192673 0.375606 H 1.185604 2.447030 -2.344288 H 2.813955 1.682606 -2.401972 H 2.252532 2.518660 -0.917749 O -3.450586 1.314759 1.656615 H -4.284034 1.001554 1.255378 </pre> |  <pre> C -3.627699 -1.317356 -1.400022 C -2.942799 -1.510045 -0.205495 C -2.192666 -0.429134 0.296147 C -2.022623 0.739589 -0.479566 C -2.698576 0.933137 -1.662937 C -3.520694 -0.112944 -2.113158 C -1.105564 -0.440183 1.334796 N -0.467789 0.799151 1.216717 C -0.990275 1.586430 0.179729 C 0.677807 1.173647 1.984130 S 2.254082 0.266418 1.578238 P 2.035848 -0.303307 -0.432407 O 1.319103 0.921918 -1.175593 C 2.049783 2.134140 -1.410035 O -0.640573 2.710702 -0.087722 O -0.808929 -1.304362 2.117173 S 3.710141 -0.961776 -1.113086 O 0.765583 -1.288488 -0.500367 C 0.910111 -2.635599 -0.021578 H 0.839235 2.240826 1.830840 H 0.506478 0.955658 3.039742 H -2.568902 1.844782 -2.236462 H -3.010861 -2.431495 0.362746 H -4.063088 -0.001161 -3.046252 H -4.248490 -2.113713 -1.796709 H 1.153905 -2.629865 1.044250 H 1.681278 -3.152751 -0.596478 H -0.060820 -3.106863 -0.170967 H 1.327370 2.838475 -1.817960 H 2.861901 1.945099 -2.115679 H 2.451200 2.523996 -0.469425 O -3.462005 0.194830 1.691452 H -4.166239 0.561407 1.127467 </pre> |  <pre> C -3.078840 2.074161 0.518875 C -2.762342 1.389732 -0.616699 C -2.392845 -0.053053 -0.532321 C -1.999658 -0.480587 0.845940 C -2.310982 0.230606 1.966763 C -2.914841 1.499414 1.814847 C -1.194715 -0.535942 -1.370531 N -0.514907 -1.467473 -0.593849 C -0.996332 -1.553131 0.733045 C 0.669560 -2.141148 -1.029449 S 2.184155 -1.072723 -1.213809 P 1.903654 0.502968 0.148467 O 1.244228 -0.138923 1.459087 C 2.033311 -0.984240 2.308532 O -0.580793 -2.330805 1.559553 O -0.914318 -0.232496 -2.501169 S 3.532164 1.512623 0.319941 O 0.582577 1.293819 -0.320914 C 0.675987 2.162917 -1.462690 H 0.880767 -2.928518 -0.305791 H 0.515065 -2.559503 -2.025715 H -2.011568 -0.133458 2.945099 H -2.889172 1.814382 -1.607978 H -3.175813 2.080718 2.691524 H -3.450857 3.091544 0.447312 H 0.929887 1.582678 -2.353897 H 1.419995 2.940357 -1.276697 H -0.314775 2.600217 -1.580144 H 1.344526 -1.376350 3.054285 H 2.831153 -0.399531 2.771929 H 2.458034 -1.811849 1.732050 O -3.466117 -0.860923 -1.049493 H -4.243243 -0.709038 -0.494551 </pre> |



**Table S17.** Optimized Cartesian coordinates for the stationary points involved in the C4-addition pathway in gas phase calculated at the M06-2X/6-31+G(d,p) level of theory.

| MCR(C4-add)                                                                                                                                                                                                                                                                                                                                                                                                                                                                                                                                                                                                                                                                                                                                                                                                                                                                                                                                                                                                                                                                                                                                    | TS(C4-add)                                                                                                                                                                                                                                                                                                                                                                                                                                                                                                                                                                                                                                                                                                                                                                                                                                                                                                                                                                                                                                                                                                                                          | Adduct(C4-add)                                                                                                                                                                                                                                                                                                                                                                                                                                                                                                                                                                                                                                                                                                                                                                                                                                                                                                                                                                                                                                                                                                                                  |
|------------------------------------------------------------------------------------------------------------------------------------------------------------------------------------------------------------------------------------------------------------------------------------------------------------------------------------------------------------------------------------------------------------------------------------------------------------------------------------------------------------------------------------------------------------------------------------------------------------------------------------------------------------------------------------------------------------------------------------------------------------------------------------------------------------------------------------------------------------------------------------------------------------------------------------------------------------------------------------------------------------------------------------------------------------------------------------------------------------------------------------------------|-----------------------------------------------------------------------------------------------------------------------------------------------------------------------------------------------------------------------------------------------------------------------------------------------------------------------------------------------------------------------------------------------------------------------------------------------------------------------------------------------------------------------------------------------------------------------------------------------------------------------------------------------------------------------------------------------------------------------------------------------------------------------------------------------------------------------------------------------------------------------------------------------------------------------------------------------------------------------------------------------------------------------------------------------------------------------------------------------------------------------------------------------------|-------------------------------------------------------------------------------------------------------------------------------------------------------------------------------------------------------------------------------------------------------------------------------------------------------------------------------------------------------------------------------------------------------------------------------------------------------------------------------------------------------------------------------------------------------------------------------------------------------------------------------------------------------------------------------------------------------------------------------------------------------------------------------------------------------------------------------------------------------------------------------------------------------------------------------------------------------------------------------------------------------------------------------------------------------------------------------------------------------------------------------------------------|
| 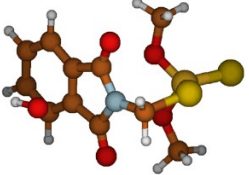                                                                                                                                                                                                                                                                                                                                                                                                                                                                                                                                                                                                                                                                                                                                                                                                                                                                                                                                                                                                                                                              |                                                                                                                                                                                                                                                                                                                                                                                                                                                                                                                                                                                                                                                                                                                                                                                                                                                                                                                                                                                                                                                                   |                                                                                                                                                                                                                                                                                                                                                                                                                                                                                                                                                                                                                                                                                                                                                                                                                                                                                                                                                                                                                                                              |
| C 3.823814 -0.574434 -1.892615<br>C 2.956693 0.505599 -1.699961<br>C 2.095790 0.438917 -0.617173<br>C 2.091820 -0.652259 0.247898<br>C 2.948165 -1.725960 0.069707<br>C 3.819986 -1.671562 -1.022476<br>C 1.078126 1.422388 -0.138188<br>N 0.499796 0.835120 0.997254<br>C 1.065202 -0.407071 1.305318<br>C -0.577548 1.423501 1.725439<br>S -2.248998 0.630903 1.496707<br>P -2.135000 -0.300831 -0.382128<br>O -0.966060 -1.399576 -0.279158<br>C -1.216487 -2.613578 0.445853<br>O 0.753325 -1.097208 2.244756<br>O 0.794996 2.506457 -0.584991<br>S -3.880457 -0.902661 -0.923731<br>O -1.326367 0.698686 -1.338009<br>C -1.948466 1.913329 -1.779975<br>H -0.385582 1.344440 2.797008<br>H -0.646205 2.467874 1.420433<br>H 2.938742 -2.566652 0.755915<br>H 2.951230 1.363318 -2.364319<br>H 4.506184 -2.492926 -1.202118<br>H 4.512305 -0.565880 -2.731422<br>H -2.254623 2.517154 -0.920106<br>H -2.813912 1.679840 -2.404386<br>H -1.186161 2.445501 -2.345530<br>H -0.296062 -3.192297 0.377775<br>H -2.047119 -3.155318 -0.011988<br>H -1.428958 -2.386432 1.494231<br>O 3.449323 1.317254 1.656568<br>H 4.283545 0.997997 1.261778 | C -3.520498 0.112599 -2.113199<br>C -2.698423 -0.933379 -1.662725<br>C -2.022425 -0.739500 -0.479415<br>C -2.192604 0.429246 0.296079<br>C -2.942594 1.510082 -0.205886<br>C -3.627414 1.317203 -1.400335<br>C -0.990258 -1.586348 0.180178<br>N -0.467925 -0.798980 1.217144<br>C -1.105530 0.440488 1.334779<br>C 0.677762 -1.173287 1.984515<br>S 2.254092 -0.266333 1.578166<br>P 2.035715 0.303195 -0.432510<br>O 0.765534 1.288490 -0.500481<br>C 0.910230 2.635536 -0.021550<br>O -0.808769 1.304917 2.116826<br>O -0.640652 -2.710704 -0.087056<br>S 3.710008 0.961449 -1.113380<br>O 1.318792 -0.922038 -1.175493<br>C 2.049380 -2.134305 -1.410004<br>H 0.506584 -0.954946 3.040077<br>H 0.839115 -2.240522 1.831543<br>H -3.010545 2.431688 0.362113<br>H -2.568681 -1.845131 -2.236062<br>H -4.248133 2.113511 -1.797232<br>H -4.062891 0.000628 -3.046270<br>H 2.860975 -1.945455 -2.116298<br>H 2.451499 -2.523796 -0.469543<br>H 1.326723 -2.838824 -1.817183<br>H -0.061098 3.106469 -0.169380<br>H 1.155572 2.629681 1.043926<br>H 1.680384 3.153091 -0.597442<br>O -3.461916 -0.194404 1.691295<br>H -4.165036 -0.563413 1.127507 | C 2.914842 1.499415 1.814846<br>C 2.310983 0.230607 1.966763<br>C 1.999658 -0.480587 0.845940<br>C 2.392845 -0.053054 -0.532321<br>C 2.762342 1.389732 -0.616700<br>C 3.078840 2.074162 0.518874<br>C 0.996332 -1.553130 0.733046<br>N 0.514907 -1.467473 -0.593847<br>C 1.194715 -0.535943 -1.370530<br>C -0.669560 -2.141149 -1.029447<br>S -2.184155 -1.072724 -1.213808<br>P -1.903654 0.502968 0.148467<br>O -0.582577 1.293819 -0.320916<br>C -0.675988 2.162916 -1.462693<br>O 0.914318 -0.232498 -2.501169<br>O 0.580793 -2.330804 1.559554<br>S -3.532165 1.512623 0.319942<br>O -1.244227 -0.138923 1.459087<br>C -2.033311 -0.984237 2.308534<br>H -0.515064 -2.559504 -2.025714<br>H -0.880767 -2.928519 -0.305790<br>H 2.889171 1.814381 -1.607979<br>H 2.011570 -0.133457 2.945099<br>H 3.450857 3.091544 0.447310<br>H 3.175815 2.080719 2.691522<br>H -2.831148 -0.399524 2.771935<br>H -2.458040 -1.811842 1.732054<br>H -1.344525 -1.376351 3.054284<br>H 0.314774 2.600216 -1.580147<br>H -0.929887 1.582676 -2.353898<br>H -1.419995 2.940355 -1.276699<br>O 3.466117 -0.860924 -1.049492<br>H 4.243243 -0.709036 -0.494552 |

**Table S18.** Optimized Cartesian coordinates for the stationary points involved in the C5-addition pathway in gas phase calculated at the M06-2X/6-31+G(d,p) level of theory.

| MCR(C5-add)                                                                       | TS(C5-add)                                                                          | Adduct(C5-add)                                                                      |
|-----------------------------------------------------------------------------------|-------------------------------------------------------------------------------------|-------------------------------------------------------------------------------------|
| 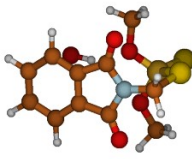 |  |  |
| C -4.103198 0.153471 -1.222565                                                    | C -3.981549 -0.324754 -1.380763                                                     | C 3.834761 0.446644 -1.484829                                                       |
| C -3.124715 -0.843107 -1.298865                                                   | C -2.983343 -1.279183 -1.123344                                                     | C 2.883903 1.415317 -1.041454                                                       |
| C -2.164614 -0.862259 -0.302666                                                   | C -2.069053 -0.989878 -0.121758                                                     | C 2.018116 1.035365 -0.014325                                                       |
| C -2.172847 0.062889 0.738886                                                     | C -2.131786 0.185329 0.612107                                                       | C 2.062667 -0.197910 0.584621                                                       |
| C -3.135819 1.053669 0.824589                                                     | C -3.068346 1.194059 0.320378                                                       | C 2.932991 -1.309872 0.111033                                                       |
| C -4.107391 1.086390 -0.182397                                                    | C -4.041079 0.864800 -0.668744                                                      | C 3.880727 -0.806806 -0.952499                                                      |
| C -1.000326 -1.773422 -0.112586                                                   | C -0.907120 -1.788570 0.367156                                                      | C 0.866534 1.800775 0.560587                                                        |
| N -0.362661 -1.325548 1.058303                                                    | N -0.323373 -1.013403 1.379487                                                      | N 0.289820 0.947062 1.502236                                                        |
| C -1.017834 -0.228470 1.635897                                                    | C -1.020311 0.186086 1.602277                                                       | C 0.990570 -0.276466 1.597595                                                       |
| C 0.861279 -1.870466 1.546086                                                     | C 0.902027 -1.347929 2.025575                                                       | C -0.959780 1.185811 2.139411                                                       |
| S 2.403656 -0.871469 1.211861                                                     | S 2.454592 -0.616969 1.277750                                                       | S -2.478582 0.569988 1.225352                                                       |
| P 1.913727 0.411034 -0.369650                                                     | P 1.878110 0.328322 -0.506399                                                       | P -1.819236 -0.314039 -0.562580                                                     |
| O 0.684400 1.330191 0.139217                                                      | O 0.700727 1.363650 -0.141937                                                       | O -0.679403 -1.388436 -0.192385                                                     |
| C 0.935931 2.377681 1.097735                                                      | C 1.021098 2.574403 0.574816                                                        | C -1.053226 -2.602934 0.490627                                                      |
| O -0.672024 0.317320 2.656007                                                     | O -0.735183 1.000601 2.445682                                                       | O 0.717741 -1.153989 2.382311                                                       |
| O -0.644625 -2.719905 -0.771883                                                   | O -0.519098 -2.876283 0.015801                                                      | O 0.479362 2.912958 0.291819                                                        |
| S 3.491501 1.313911 -0.991149                                                     | S 3.441758 1.014616 -1.388655                                                       | S -3.346220 -0.928677 -1.556420                                                     |
| O 1.028388 -0.424851 -1.411881                                                    | O 0.930031 -0.689947 -1.306547                                                      | O -0.815962 0.721542 -1.270837                                                      |
| C 1.657881 -1.419895 -2.235824                                                    | C 1.511961 -1.837921 -1.945412                                                      | C -1.350499 1.902028 -1.891662                                                      |
| H 0.821589 -1.947335 2.633845                                                     | H 0.873938 -0.980155 3.051680                                                       | H -0.966240 0.676424 3.103038                                                       |
| H 0.993372 -2.851307 1.089312                                                     | H 1.019757 -2.431104 1.996936                                                       | H -1.094722 2.260864 2.258046                                                       |
| H -3.126916 1.775079 1.635042                                                     | H -3.229699 2.009985 1.013772                                                       | H 3.497337 -1.752179 0.942210                                                       |
| H -3.107524 -1.568410 -2.105456                                                   | H -2.924709 -2.209453 -1.678551                                                     | H 2.817776 2.400299 -1.489040                                                       |
| H -4.870577 1.857063 -0.162958                                                    | H -4.813771 1.591044 -0.895118                                                      | H 4.588383 -1.536623 -1.334015                                                      |
| H -4.867383 0.212639 -1.990371                                                    | H -4.720541 -0.519688 -2.150561                                                     | H 4.522205 0.714415 -2.280823                                                       |
| H 2.119914 -2.188522 -1.609609                                                    | H 1.984973 -2.482826 -1.199659                                                      | H -1.828752 2.536161 -1.140314                                                      |
| H 2.405539 -0.947881 -2.876865                                                    | H 2.239382 -1.514975 -2.693380                                                      | H -2.062065 1.620042 -2.670748                                                      |
| H 0.857581 -1.863329 -2.824504                                                    | H 0.682983 -2.368410 -2.410120                                                      | H -0.495298 2.424788 -2.316731                                                      |
| H -0.020490 2.881007 1.235756                                                     | H 0.076473 3.107726 0.671009                                                        | H -0.117775 -3.128665 0.676503                                                      |
| H 1.682189 3.067605 0.698839                                                      | H 1.746190 3.155756 0.001568                                                        | H -1.721499 -3.186162 -0.146330                                                     |
| H 1.266187 1.937513 2.041444                                                      | H 1.413769 2.322839 1.563063                                                        | H -1.535022 -2.359895 1.441041                                                      |
| O -1.594903 2.419936 -1.248558                                                    | O -1.973007 2.411796 -0.778883                                                      | O 2.145353 -2.390406 -0.395787                                                      |
| H -0.823283 1.869810 -0.992199                                                    | H -1.221147 1.828701 -1.003244                                                      | H 1.435011 -2.014388 -0.938296                                                      |

**Table S19.** Optimized Cartesian coordinates for the stationary points involved in the C6-addition pathway in gas phase calculated at the M06-2X/6-31+G(d,p) level of theory.

| MCR(C6-add)                                                                                                                                                                                                                                                                                                                                                                                                                                                                                                                                                                                                                                                                                                                                                                                                                                                                                                                                                                                                                                                                                                                                   | TS(C6-add)                                                                                                                                                                                                                                                                                                                                                                                                                                                                                                                                                                                                                                                                                                                                                                                                                                                                                                                                                                                                                                                                                                                                   | Adduct(C6-add)                                                                                                                                                                                                                                                                                                                                                                                                                                                                                                                                                                                                                                                                                                                                                                                                                                                                                                                                                                                                                                                                                                                             |
|-----------------------------------------------------------------------------------------------------------------------------------------------------------------------------------------------------------------------------------------------------------------------------------------------------------------------------------------------------------------------------------------------------------------------------------------------------------------------------------------------------------------------------------------------------------------------------------------------------------------------------------------------------------------------------------------------------------------------------------------------------------------------------------------------------------------------------------------------------------------------------------------------------------------------------------------------------------------------------------------------------------------------------------------------------------------------------------------------------------------------------------------------|----------------------------------------------------------------------------------------------------------------------------------------------------------------------------------------------------------------------------------------------------------------------------------------------------------------------------------------------------------------------------------------------------------------------------------------------------------------------------------------------------------------------------------------------------------------------------------------------------------------------------------------------------------------------------------------------------------------------------------------------------------------------------------------------------------------------------------------------------------------------------------------------------------------------------------------------------------------------------------------------------------------------------------------------------------------------------------------------------------------------------------------------|--------------------------------------------------------------------------------------------------------------------------------------------------------------------------------------------------------------------------------------------------------------------------------------------------------------------------------------------------------------------------------------------------------------------------------------------------------------------------------------------------------------------------------------------------------------------------------------------------------------------------------------------------------------------------------------------------------------------------------------------------------------------------------------------------------------------------------------------------------------------------------------------------------------------------------------------------------------------------------------------------------------------------------------------------------------------------------------------------------------------------------------------|
| 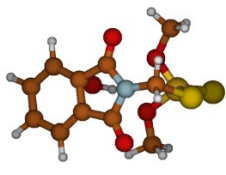                                                                                                                                                                                                                                                                                                                                                                                                                                                                                                                                                                                                                                                                                                                                                                                                                                                                                                                                                                                                                                                             |                                                                                                                                                                                                                                                                                                                                                                                                                                                                                                                                                                                                                                                                                                                                                                                                                                                                                                                                                                                                                                                            |                                                                                                                                                                                                                                                                                                                                                                                                                                                                                                                                                                                                                                                                                                                                                                                                                                                                                                                                                                                                                                                         |
| C 4.152596 1.165701 0.144902<br>C 3.176015 0.927583 1.117990<br>C 2.206230 -0.012905 0.820377<br>C 2.201351 -0.702691 -0.389866<br>C 3.161687 -0.473919 -1.360500<br>C 4.143674 0.480291 -1.072509<br>C 1.038411 -0.471868 1.625253<br>N 0.395974 -1.440040 0.841034<br>C 1.042924 -1.642160 -0.392837<br>C -0.840248 -2.063193 1.191584<br>S -2.333567 -0.952864 1.235393<br>P -1.948830 0.470248 -0.249338<br>O -1.186787 -0.293042 -1.433983<br>C -1.902818 -1.187059 -2.298617<br>O 0.702952 -2.443953 -1.228064<br>O 0.671412 -0.123026 2.721829<br>S -3.526382 1.495138 -0.634116<br>O -0.630536 1.284665 0.219911<br>C -0.736086 2.264373 1.268816<br>H -1.016189 -2.862846 0.471433<br>H -0.787904 -2.464045 2.205897<br>H 3.139094 -1.005886 -2.305538<br>H 3.171071 1.455009 2.066426<br>H 4.906500 0.700792 -1.811615<br>H 4.927022 1.901970 0.333042<br>H -1.039154 1.775872 2.198454<br>H -1.449213 3.039208 0.980083<br>H 0.264450 2.682184 1.378480<br>H -1.147624 -1.648151 -2.931907<br>H -2.628043 -0.624630 -2.890518<br>H -2.411647 -1.956518 -1.709689<br>O 1.413963 1.841696 -1.828732<br>H 0.661014 1.521582 -1.287359 | C -3.952006 0.458947 -1.007331<br>C -2.956024 -0.379204 -1.497173<br>C -1.991849 -0.811342 -0.597109<br>C -2.028839 -0.458903 0.755133<br>C -3.012335 0.355395 1.267084<br>C -3.953839 0.894845 0.346833<br>C -0.777239 -1.641328 -0.829694<br>N -0.142806 -1.737428 0.416914<br>C -0.850611 -1.071834 1.432723<br>C 1.151866 -2.307346 0.606879<br>S 2.590976 -1.284608 -0.002038<br>P 1.869164 0.683251 -0.156313<br>O 0.952708 0.950164 1.131862<br>C 1.570909 1.108564 2.418617<br>O -0.533773 -1.048655 2.596565<br>O -0.373680 -2.147085 -1.849348<br>S 3.331584 1.875877 -0.522744<br>O 0.646385 0.653195 -1.201642<br>C 0.932614 0.510445 -2.602906<br>H 1.286186 -2.476988 1.675168<br>H 1.226980 -3.242766 0.050383<br>H -3.035050 0.632374 2.315272<br>H -2.924073 -0.683948 -2.537983<br>H -4.828138 1.407615 0.727570<br>H -4.720476 0.840079 -1.670595<br>H 1.444691 -0.438239 -2.785385<br>H 1.538248 1.352481 -2.944696<br>H -0.035591 0.503951 -3.102068<br>H 0.752899 1.236452 3.124672<br>H 2.224163 1.983782 2.408472<br>H 2.140041 0.210563 2.676473<br>O -3.123629 2.685747 0.103388<br>H -2.208631 2.431211 -0.119400 | C 3.923391 0.469618 -1.132316<br>C 2.897527 1.350333 -0.946370<br>C 1.936992 1.051635 0.039889<br>C 2.015943 -0.138534 0.817076<br>C 3.007049 -1.042265 0.678208<br>C 4.088005 -0.808766 -0.344991<br>C 0.709676 1.768636 0.414890<br>N 0.093923 0.979507 1.408239<br>C 0.824847 -0.174088 1.719357<br>C -1.189198 1.268926 1.961506<br>S -2.658487 0.910920 0.865965<br>P -1.963088 -0.446820 -0.578374<br>O -1.028019 -1.500776 0.185350<br>C -1.625171 -2.470987 1.059054<br>O 0.526107 -0.982956 2.564628<br>O 0.261150 2.816449 0.004480<br>S -3.445180 -1.099904 -1.616078<br>O -0.764102 0.281898 -1.362666<br>C -1.078670 1.327319 -2.296684<br>H -1.297800 0.680652 2.872664<br>H -1.263011 2.336880 2.172846<br>H 3.040208 -1.956959 1.262917<br>H 2.803786 2.251946 -1.543565<br>H 5.059440 -0.776322 0.171233<br>H 4.676008 0.643915 -1.895350<br>H -1.567564 2.156883 -1.778831<br>H -1.714790 0.934089 -3.092698<br>H -0.122630 1.662055 -2.697303<br>H -0.796588 -3.032394 1.486027<br>H -2.291309 -3.121568 0.487938<br>H -2.176857 -1.969272 1.859566<br>O 4.211807 -1.929822 -1.217151<br>H 3.380743 -2.029697 -1.700568 |

**Table S20.** Optimized Cartesian coordinates for the stationary points involved in the C7-addition pathway in gas phase calculated at the M06-2X/6-31+G(d,p) level of theory.

| MCR(C7-add)                                                                       | TS(C7-add)                                                                          | Adduct(C7-add)                                                                      |
|-----------------------------------------------------------------------------------|-------------------------------------------------------------------------------------|-------------------------------------------------------------------------------------|
| 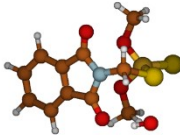 |  |  |
| C -4.265215 0.142321 1.411660                                                     | C 3.948166 0.478995 1.719368                                                        | C -4.497060 0.931355 -0.772389                                                      |
| C -3.219642 1.033078 1.145002                                                     | C 3.132900 -0.588755 1.328881                                                       | C -3.638688 -0.114641 -1.123498                                                     |
| C -2.304109 0.656271 0.178809                                                     | C 2.236882 -0.354570 0.302206                                                       | C -2.548199 -0.342834 -0.300035                                                     |
| C -2.413841 -0.549725 -0.505211                                                   | C 2.139719 0.885960 -0.316425                                                       | C -2.301375 0.439231 0.821220                                                       |
| C -3.445443 -1.436653 -0.254270                                                   | C 2.945108 1.948059 0.057276                                                        | C -3.146941 1.478098 1.176551                                                       |
| C -4.375728 -1.070500 0.724615                                                    | C 3.858590 1.725485 1.091885                                                        | C -4.253571 1.718588 0.358219                                                       |
| C -1.093870 1.366746 -0.319792                                                    | C 1.244435 -1.271783 -0.340921                                                      | C -1.421060 -1.371097 -0.446076                                                     |
| N -0.538436 0.546294 -1.297385                                                    | N 0.526598 -0.472627 -1.237177                                                      | N -0.666492 -1.165337 0.773966                                                      |
| C -1.281798 -0.642828 -1.470406                                                   | C 1.060926 0.818293 -1.343820                                                       | C -1.072534 -0.057885 1.505150                                                      |
| C 0.714562 0.776540 -1.957477                                                     | C -0.580216 -0.939509 -2.007068                                                     | C 0.589325 -1.815292 0.971984                                                       |
| S 2.219883 0.779562 -0.870427                                                     | S -2.195234 -1.118873 -1.093532                                                     | S 1.771680 -1.583755 -0.427928                                                      |
| P 1.747908 -0.645061 0.605542                                                     | P -2.038987 0.236837 0.503083                                                       | P 2.193608 0.479360 -0.238824                                                       |
| O 0.889433 -1.773488 -0.141856                                                    | O -1.309836 1.539623 -0.076034                                                      | O 2.464064 0.668987 1.329340                                                        |
| C 1.546133 -2.697925 -1.021043                                                    | C -2.014644 2.404344 -0.977667                                                      | C 3.690070 0.194959 1.895410                                                        |
| O -1.025318 -1.503838 -2.273502                                                   | O 0.694272 1.659606 -2.128659                                                       | O -0.538249 0.363116 2.504857                                                       |
| O -0.655590 2.444094 0.028044                                                     | O 0.789489 -2.348976 0.132688                                                       | O -0.766401 -0.959549 -1.574027                                                     |
| S 3.316597 -1.149302 1.593661                                                     | S -3.747039 0.432165 1.369273                                                       | S 3.555692 1.017387 -1.487253                                                       |
| O 0.510604 -0.029313 1.430501                                                     | O -0.800972 -0.254320 1.402889                                                      | O 0.784551 1.235040 -0.281596                                                       |
| C 0.766355 1.016156 2.380699                                                      | C -0.987837 -1.371240 2.284444                                                      | C 0.310066 1.831322 -1.499182                                                       |
| H 0.819115 -0.003040 -2.712812                                                    | H -0.727015 -0.234841 -2.826031                                                     | H 1.019454 -1.419267 1.894756                                                       |
| H 0.735526 1.765645 -2.420380                                                     | H -0.365063 -1.938952 -2.390945                                                     | H 0.462283 -2.898362 1.039258                                                       |
| H -3.521086 -2.374316 -0.794622                                                   | H 2.857250 2.912073 -0.432708                                                       | H -2.944189 2.072893 2.061341                                                       |
| H -3.125841 1.979773 1.667168                                                     | H 3.194105 -1.557707 1.814815                                                       | H -3.824285 -0.722328 -2.003389                                                     |
| H -5.199099 -1.738124 0.956375                                                    | H 4.505112 2.532754 1.419930                                                        | H -4.938227 2.524271 0.602362                                                       |
| H -5.005472 0.395476 2.163574                                                     | H 4.661771 0.340217 2.525108                                                        | H -5.366504 1.138209 -1.388057                                                      |
| H 1.236244 1.871343 1.885349                                                      | H -1.279188 -2.257353 1.713305                                                      | H 0.395696 1.133560 -2.333439                                                       |
| H 1.403978 0.640417 3.183633                                                      | H -1.743978 -1.130255 3.034877                                                      | H 0.877097 2.741590 -1.702779                                                       |
| H -0.209280 1.308030 2.767969                                                     | H -0.019567 -1.540675 2.754165                                                      | H -0.740420 2.063170 -1.319268                                                      |
| H 0.749057 -3.262158 -1.501655                                                    | H -1.295586 3.163283 -1.279357                                                      | H 3.640453 0.439078 2.955264                                                        |
| H 2.203374 -3.352466 -0.444502                                                    | H -2.872044 2.850090 -0.468200                                                      | H 4.540575 0.695982 1.426623                                                        |
| H 2.125953 -2.159428 -1.777731                                                    | H -2.347114 1.845131 -1.857735                                                      | H 3.780074 -0.888290 1.761590                                                       |
| O 1.784066 3.585878 -1.028101                                                     | O 2.231943 -2.305461 -1.477986                                                      | O -1.796298 -2.712947 -0.511780                                                     |
| H 0.964301 3.349010 -0.541760                                                     | H 2.662949 -2.976038 -0.917223                                                      | H -1.820174 -2.959670 -1.445239                                                     |

**Table S21.** Optimized Cartesian coordinates for the stationary points involved in the C9-addition pathway in gas phase calculated at the M06-2X/6-31+G(d,p) level of theory.

| MCR(C9-add)                                                                                                                                                                                                                                                                                                                                                                                                                                                                                                                                                                                                                                                                                                                                                                                                                                                                                                                                                                                                                                                                                                                                     | TS(C9-add)                                                                                                                                                                                                                                                                                                                                                                                                                                                                                                                                                                                                                                                                                                                                                                                                                                                                                                                                                                                                                                                                                                                                    | Adduct(C9-add)                                                                                                                                                                                                                                                                                                                                                                                                                                                                                                                                                                                                                                                                                                                                                                                                                                                                                                                                                                                                                                                                                                                             |
|-------------------------------------------------------------------------------------------------------------------------------------------------------------------------------------------------------------------------------------------------------------------------------------------------------------------------------------------------------------------------------------------------------------------------------------------------------------------------------------------------------------------------------------------------------------------------------------------------------------------------------------------------------------------------------------------------------------------------------------------------------------------------------------------------------------------------------------------------------------------------------------------------------------------------------------------------------------------------------------------------------------------------------------------------------------------------------------------------------------------------------------------------|-----------------------------------------------------------------------------------------------------------------------------------------------------------------------------------------------------------------------------------------------------------------------------------------------------------------------------------------------------------------------------------------------------------------------------------------------------------------------------------------------------------------------------------------------------------------------------------------------------------------------------------------------------------------------------------------------------------------------------------------------------------------------------------------------------------------------------------------------------------------------------------------------------------------------------------------------------------------------------------------------------------------------------------------------------------------------------------------------------------------------------------------------|--------------------------------------------------------------------------------------------------------------------------------------------------------------------------------------------------------------------------------------------------------------------------------------------------------------------------------------------------------------------------------------------------------------------------------------------------------------------------------------------------------------------------------------------------------------------------------------------------------------------------------------------------------------------------------------------------------------------------------------------------------------------------------------------------------------------------------------------------------------------------------------------------------------------------------------------------------------------------------------------------------------------------------------------------------------------------------------------------------------------------------------------|
| 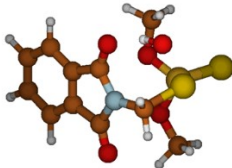                                                                                                                                                                                                                                                                                                                                                                                                                                                                                                                                                                                                                                                                                                                                                                                                                                                                                                                                                                                                                                                               |                                                                                                                                                                                                                                                                                                                                                                                                                                                                                                                                                                                                                                                                                                                                                                                                                                                                                                                                                                                                                                                             |                                                                                                                                                                                                                                                                                                                                                                                                                                                                                                                                                                                                                                                                                                                                                                                                                                                                                                                                                                                                                                                         |
| C 4.376061 -1.070067 0.725123<br>C 3.445696 -1.436774 -0.253487<br>C 2.413962 -0.550086 -0.504689<br>C 2.304139 0.656240 0.178759<br>C 3.219755 1.033572 1.144671<br>C 4.265470 0.143058 1.411608<br>C 1.281973 -0.643765 -1.469892<br>N 0.538512 0.545320 -1.297433<br>C 1.093878 1.366345 -0.320270<br>C -0.714292 0.775474 -1.957893<br>S -2.219841 0.779175 -0.871174<br>P -1.748139 -0.644624 0.605637<br>O -0.511010 -0.028298 1.430471<br>C -0.767002 1.017762 2.379948<br>O 0.655426 2.443862 0.026821<br>O 1.025612 -1.505234 -2.272546<br>S -3.317029 -1.148280 1.593736<br>O -0.889602 -1.773516 -0.140950<br>C -1.546189 -2.698800 -1.019328<br>H -0.734987 1.764399 -2.421218<br>H -0.818795 -0.004376 -2.712956<br>H 3.125945 1.980486 1.666436<br>H 3.521362 -2.374668 -0.793435<br>H 5.005785 0.396685 2.163306<br>H 5.199556 -1.737466 0.957087<br>H -2.126540 -2.161068 -1.776159<br>H -2.202924 -3.353270 -0.442137<br>H -0.749043 -3.262978 -1.499895<br>H 0.208537 1.310109 2.767098<br>H -1.404596 0.642448 3.183106<br>H -1.237047 1.872542 1.884036<br>O -1.783230 3.585520 -1.029133<br>H -0.963130 3.348552 -0.543370 | C -3.859057 -1.724491 -1.092835<br>C -2.945433 -1.947911 -0.058533<br>C -2.139808 -0.886193 0.315746<br>C -2.236890 0.354764 -0.302037<br>C -3.133080 0.589807 -1.328366<br>C -3.948567 -0.477556 -1.719445<br>C -1.060993 -0.819304 1.343176<br>N -0.526609 0.471667 1.237471<br>C -1.244366 1.271448 0.341697<br>C 0.580299 0.937886 2.007642<br>S 2.195142 1.118474 1.094090<br>P 2.039110 -0.236477 -0.503208<br>O 0.801068 0.255017 -1.402786<br>C 0.987854 1.372360 -2.283826<br>O -0.789389 2.348969 -0.131200<br>O -0.694450 -1.661292 2.127353<br>S 3.747162 -0.431266 -1.369512<br>O 1.310060 -1.539592 0.075310<br>C 2.015039 -2.404769 0.976382<br>H 0.365120 1.936844 2.392776<br>H 0.727301 0.232275 2.825756<br>H -3.194240 1.559110 -1.813607<br>H -2.857657 -2.912265 0.430796<br>H -4.662314 -0.338116 -2.524946<br>H -4.505767 -2.531436 -1.421309<br>H 2.348637 -1.845785 1.856170<br>H 2.871728 -2.851055 0.466197<br>H 1.295730 -3.163241 1.278656<br>H 0.019545 1.542027 -2.753385<br>H 1.743924 1.131719 -3.034441<br>H 1.279278 2.258199 -1.712302<br>O -2.231719 2.304446 1.479488<br>H -2.663066 2.975293 0.919307 | C 4.253652 1.718574 0.358163<br>C 3.147066 1.478059 1.176552<br>C 2.301483 0.439200 0.821239<br>C 2.548264 -0.342823 -0.300059<br>C 3.638708 -0.114611 -1.123575<br>C 4.497092 0.931381 -0.772481<br>C 1.072679 -0.057938 1.505216<br>N 0.666601 -1.165372 0.774015<br>C 1.421104 -1.371069 -0.446084<br>C -0.589238 -1.815276 0.972019<br>S -1.771615 -1.583776 -0.427911<br>P -2.193670 0.479301 -0.238803<br>O -0.784604 1.235002 -0.281323<br>C -0.310017 1.831409 -1.498825<br>O 0.766476 -0.959378 -1.573992<br>O 0.538476 0.363034 2.504977<br>S -3.555615 1.017407 -1.487357<br>O -2.464397 0.668820 1.329350<br>C -3.690731 0.195058 1.894976<br>H -0.462239 -2.898348 1.039303<br>H -1.019401 -1.419205 1.894754<br>H 3.824252 -0.722281 -2.003488<br>H 2.944371 2.072826 2.061373<br>H 5.366503 1.138268 -1.388183<br>H 4.938318 2.524254 0.602292<br>H -4.540963 0.696141 1.425762<br>H -3.780799 -0.888199 1.761279<br>H -3.641498 0.439327 2.954812<br>H 0.740273 2.063832 -1.318521<br>H -0.394958 1.133483 -2.333012<br>H -0.877450 2.741353 -1.702748<br>O 1.796238 -2.712937 -0.511875<br>H 1.820249 -2.959565 -1.445356 |

**Table S22.** Optimized Cartesian coordinates for the stationary points involved in the P12-addition pathway in gas phase calculated at the M06-2X/6-31+G(d,p) level of theory.

| MCR(P12-add)                                                                      |           |           |           | TS(P12-add)                                                                       |           |           |           | MCP(P12-add)                                                                        |           |           |           | Product1(P12-add)                                                                   |           |           |           | Product2(P12-add)                                                                   |           |           |           |
|-----------------------------------------------------------------------------------|-----------|-----------|-----------|-----------------------------------------------------------------------------------|-----------|-----------|-----------|-------------------------------------------------------------------------------------|-----------|-----------|-----------|-------------------------------------------------------------------------------------|-----------|-----------|-----------|-------------------------------------------------------------------------------------|-----------|-----------|-----------|
| 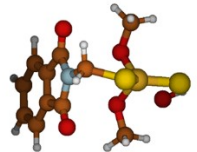 |           |           |           |  |           |           |           |  |           |           |           |  |           |           |           |  |           |           |           |
| C                                                                                 | -4.099118 | 1.663196  | -0.085234 | C                                                                                 | -4.188214 | -1.562555 | -0.191962 | C                                                                                   | -3.081968 | -1.885855 | 1.094985  | C                                                                                   | 3.463717  | 0.699620  | 0.351260  | P                                                                                   | -0.022233 | 0.078168  | 0.342429  |
| C                                                                                 | -3.238524 | 1.138300  | -1.055338 | C                                                                                 | -3.314794 | -1.239066 | 0.852127  | C                                                                                   | -2.444355 | -0.775950 | 1.663516  | C                                                                                   | 2.286876  | 1.423845  | 0.132327  | O                                                                                   | 0.353342  | 0.006323  | 1.900246  |
| C                                                                                 | -2.388607 | 0.120764  | -0.660025 | C                                                                                 | -2.425057 | -0.202707 | 0.631842  | C                                                                                   | -1.931957 | 0.172090  | 0.793765  | C                                                                                   | 1.129679  | 0.696045  | -0.082747 | O                                                                                   | -1.528435 | -0.464422 | 0.387430  |
| C                                                                                 | -2.388976 | -0.368398 | 0.642704  | C                                                                                 | -2.399959 | 0.496495  | -0.570848 | C                                                                                   | -2.042228 | 0.032631  | -0.585719 | C                                                                                   | 1.129910  | -0.696012 | -0.082577 | O                                                                                   | 0.696680  | -1.196542 | -0.333736 |
| C                                                                                 | -3.238204 | 0.139400  | 1.609824  | C                                                                                 | -3.261133 | 0.189005  | -1.609270 | C                                                                                   | -2.673030 | -1.057211 | -1.161748 | C                                                                                   | 2.287324  | -1.423413 | 0.132664  | S                                                                                   | 0.338478  | 1.776271  | -0.471962 |
| C                                                                                 | -4.098678 | 1.172565  | 1.224152  | C                                                                                 | -4.161447 | -0.861193 | -1.401328 | C                                                                                   | -3.194829 | -2.023912 | -0.294482 | C                                                                                   | 3.463943  | -0.698774 | 0.351422  | C                                                                                   | -2.251728 | -0.613957 | -0.840894 |
| C                                                                                 | -1.360534 | -0.626118 | -1.441429 | C                                                                                 | -1.374346 | 0.364919  | 1.526974  | C                                                                                   | -1.156536 | 1.420611  | 1.075144  | C                                                                                   | -0.267052 | 1.163407  | -0.337586 | C                                                                                   | 2.063020  | -1.105245 | -0.753341 |
| N                                                                                 | -0.795772 | -1.541250 | -0.540515 | N                                                                                 | -0.772175 | 1.397054  | 0.790823  | N                                                                                   | -0.869847 | 1.973533  | -0.175222 | N                                                                                   | -1.024870 | -0.000409 | -0.519482 | H                                                                                   | 0.001175  | -0.789068 | 2.327590  |
| C                                                                                 | -1.368833 | -1.452143 | 0.740087  | C                                                                                 | -1.338779 | 1.541439  | -0.486068 | C                                                                                   | -1.338849 | 1.184504  | -1.229190 | C                                                                                   | -0.266657 | -1.163917 | -0.337295 | H                                                                                   | -1.776312 | -1.376103 | -1.463370 |
| C                                                                                 | 0.309871  | -2.389737 | -0.851185 | C                                                                                 | 0.368694  | 2.136259  | 1.233146  | C                                                                                   | -0.019162 | 3.119773  | -0.359128 | C                                                                                   | -2.456015 | -0.000682 | -0.663016 | H                                                                                   | 2.709899  | -0.888760 | 0.101606  |
| S                                                                                 | 1.959465  | -1.548309 | -1.062315 | S                                                                                 | 1.968903  | 1.195132  | 1.326291  | S                                                                                   | 1.744295  | 2.811849  | -0.136538 | O                                                                                   | -0.703462 | -2.288100 | -0.389658 | H                                                                                   | -2.288656 | 0.340837  | -1.371894 |
| P                                                                                 | 1.787298  | 0.198283  | 0.089091  | P                                                                                 | 1.768831  | -0.303698 | -0.154306 | P                                                                                   | 1.383810  | -1.318429 | 0.044047  | O                                                                                   | -0.704263 | 2.287411  | -0.390264 | H                                                                                   | -3.256812 | -0.927460 | -0.563784 |
| O                                                                                 | 1.025445  | -0.208229 | 1.432504  | O                                                                                 | 1.112192  | 0.435950  | -1.401966 | O                                                                                   | 0.860697  | -0.416986 | -1.184593 | H                                                                                   | 2.273467  | -2.508300 | 0.132053  | H                                                                                   | 2.172779  | -0.322306 | -1.507288 |
| C                                                                                 | 1.680257  | -1.023080 | 2.413733  | C                                                                                 | 1.821393  | 1.464198  | -2.104125 | C                                                                                   | 0.956512  | -0.947628 | -2.513940 | H                                                                                   | 2.272707  | 2.508728  | 0.131473  | H                                                                                   | 2.315328  | -2.077661 | -1.174009 |
| O                                                                                 | -1.079612 | -2.154149 | 1.678559  | O                                                                                 | -1.016095 | 2.375305  | -1.298009 | O                                                                                   | -1.197128 | 1.429835  | -2.403487 | H                                                                                   | 4.394490  | -1.229052 | 0.525819  |                                                                                     |           |           |           |
| O                                                                                 | -1.045784 | -0.520475 | -2.601811 | O                                                                                 | -1.071151 | 0.053350  | 2.652281  | O                                                                                   | -0.835279 | 1.902714  | 2.135176  | H                                                                                   | 4.394087  | 1.230247  | 0.525540  |                                                                                     |           |           |           |
| S                                                                                 | 3.548396  | 1.004523  | 0.205671  | S                                                                                 | 3.591007  | -1.063889 | -0.224995 | S                                                                                   | 3.194117  | -1.945542 | -0.041201 | H                                                                                   | -2.747501 | -0.891674 | -1.226640 |                                                                                     |           |           |           |
| O                                                                                 | 0.593655  | 1.047722  | -0.541729 | O                                                                                 | 0.514531  | -1.153198 | 0.328765  | O                                                                                   | 0.951961  | -0.355855 | 1.246989  | S                                                                                   | -3.377120 | 0.000519  | 0.889295  |                                                                                     |           |           |           |
| C                                                                                 | 0.827815  | 1.850770  | -1.710750 | C                                                                                 | 0.707185  | -2.289510 | 1.186331  | C                                                                                   | 1.887174  | 0.140233  | 2.218100  | H                                                                                   | -2.747788 | 0.889408  | -1.227933 |                                                                                     |           |           |           |
| H                                                                                 | 0.395309  | -3.121791 | -0.047765 | H                                                                                 | 0.492836  | 2.977246  | 0.550064  | H                                                                                   | -0.186011 | 3.499371  | -1.370772 |                                                                                     |           |           |           |                                                                                     |           |           |           |
| H                                                                                 | 0.140969  | -2.884397 | -1.809396 | H                                                                                 | 0.209782  | 2.490883  | 2.253235  | H                                                                                   | -0.300932 | 3.895166  | 0.360358  |                                                                                     |           |           |           |                                                                                     |           |           |           |
| H                                                                                 | -3.227703 | -0.249681 | 2.622492  | H                                                                                 | -3.229732 | 0.740722  | -2.542863 | H                                                                                   | -2.743554 | -1.156524 | -2.240107 |                                                                                     |           |           |           |                                                                                     |           |           |           |
| H                                                                                 | -3.231615 | 1.508189  | -2.075578 | H                                                                                 | -3.328204 | -1.773195 | 1.796766  | H                                                                                   | -2.337624 | -0.663620 | 2.737413  |                                                                                     |           |           |           |                                                                                     |           |           |           |
| H                                                                                 | -4.777830 | 1.603733  | 1.952376  | H                                                                                 | -4.851601 | -1.139169 | -2.191198 | H                                                                                   | -3.688595 | -2.899977 | -0.701852 |                                                                                     |           |           |           |                                                                                     |           |           |           |
| H                                                                                 | -4.779653 | 2.465597  | -0.350927 | H                                                                                 | -4.899859 | -2.371686 | -0.063547 | H                                                                                   | -3.490904 | -2.657170 | 1.739414  |                                                                                     |           |           |           |                                                                                     |           |           |           |
| H                                                                                 | 1.166237  | 1.218390  | -2.536528 | H                                                                                 | 1.166289  | -1.972936 | 2.127130  | H                                                                                   | 2.168066  | -0.664949 | 2.899965  |                                                                                     |           |           |           |                                                                                     |           |           |           |
| H                                                                                 | 1.554440  | 2.629576  | -1.473031 | H                                                                                 | 1.319230  | -3.029530 | 0.667361  | H                                                                                   | 2.773917  | 0.538289  | 1.722989  |                                                                                     |           |           |           |                                                                                     |           |           |           |
| H                                                                                 | -0.138454 | 2.289131  | -1.957736 | H                                                                                 | -0.292381 | -2.678056 | 1.378494  | H                                                                                   | 1.357471  | 0.932361  | 2.747438  |                                                                                     |           |           |           |                                                                                     |           |           |           |
| H                                                                                 | 0.916928  | -1.262933 | 3.151383  | H                                                                                 | 1.081927  | 1.943369  | -2.742943 | H                                                                                   | 0.412558  | -1.895268 | -2.581437 |                                                                                     |           |           |           |                                                                                     |           |           |           |
| H                                                                                 | 2.504580  | -0.465545 | 2.863891  | H                                                                                 | 2.624247  | 1.018143  | -2.696471 | H                                                                                   | 0.498929  | -0.203395 | -3.164916 |                                                                                     |           |           |           |                                                                                     |           |           |           |
| H                                                                                 | 2.053223  | -1.945152 | 1.956883  | H                                                                                 | 2.236465  | 2.194464  | -1.402636 | H                                                                                   | 2.006114  | -1.100607 | -2.776826 |                                                                                     |           |           |           |                                                                                     |           |           |           |
| O                                                                                 | 1.941785  | 3.088478  | 0.965868  | O                                                                                 | 2.002552  | -2.201698 | -1.531244 | O                                                                                   | 0.302993  | -2.509645 | 0.135960  |                                                                                     |           |           |           |                                                                                     |           |           |           |
| H                                                                                 | 2.755990  | 3.350067  | 1.431125  | H                                                                                 | 2.447726  | -2.025496 | -2.374842 | H                                                                                   | -0.582840 | -2.199104 | 0.389831  |                                                                                     |           |           |           |                                                                                     |           |           |           |

**Table S23.** Optimized Cartesian coordinates for the stationary points involved in the S17-addition pathway in gas phase calculated at the M06-2X/6-31+G(d,p) level of theory.

| MCR(S17-add)                                                                                                                                                                                                                                                                                                                                                                                                                                                                                                                                                                                                                                                                                                                                                                                                                                                                                                                                                                                                                                                                                                                                   | TS(S17-add)                                                                                                                                                                                                                                                                                                                                                                                                                                                                                                                                                                                                                                                                                                                                                                                                                                                                                                                                                                                                                                                                                                                                       | Adduct(S17-add)                                                                                                                                                                                                                                                                                                                                                                                                                                                                                                                                                                                                                                                                                                                                                                                                                                                                                                                                                                                                                                                                                                                                |
|------------------------------------------------------------------------------------------------------------------------------------------------------------------------------------------------------------------------------------------------------------------------------------------------------------------------------------------------------------------------------------------------------------------------------------------------------------------------------------------------------------------------------------------------------------------------------------------------------------------------------------------------------------------------------------------------------------------------------------------------------------------------------------------------------------------------------------------------------------------------------------------------------------------------------------------------------------------------------------------------------------------------------------------------------------------------------------------------------------------------------------------------|---------------------------------------------------------------------------------------------------------------------------------------------------------------------------------------------------------------------------------------------------------------------------------------------------------------------------------------------------------------------------------------------------------------------------------------------------------------------------------------------------------------------------------------------------------------------------------------------------------------------------------------------------------------------------------------------------------------------------------------------------------------------------------------------------------------------------------------------------------------------------------------------------------------------------------------------------------------------------------------------------------------------------------------------------------------------------------------------------------------------------------------------------|------------------------------------------------------------------------------------------------------------------------------------------------------------------------------------------------------------------------------------------------------------------------------------------------------------------------------------------------------------------------------------------------------------------------------------------------------------------------------------------------------------------------------------------------------------------------------------------------------------------------------------------------------------------------------------------------------------------------------------------------------------------------------------------------------------------------------------------------------------------------------------------------------------------------------------------------------------------------------------------------------------------------------------------------------------------------------------------------------------------------------------------------|
|                                                                                                                                                                                                                                                                                                                                                                                                                                                                                                                                                                                                                                                                                                                                                                                                                                                                                                                                                                                                                                                               |                                                                                                                                                                                                                                                                                                                                                                                                                                                                                                                                                                                                                                                                                                                                                                                                                                                                                                                                                                                                                                                                |                                                                                                                                                                                                                                                                                                                                                                                                                                                                                                                                                                                                                                                                                                                                                                                                                                                                                                                                                                                                                                                             |
| C -4.230709 -1.401405 -1.014687<br>C -3.229141 -1.749766 -0.102064<br>C -2.412031 -0.731448 0.355983<br>C -2.577437 0.584318 -0.063585<br>C -3.567710 0.942713 -0.961265<br>C -4.396890 -0.078586 -1.436875<br>C -1.267032 -0.778849 1.311971<br>N -0.800799 0.540332 1.408041<br>C -1.548327 1.426447 0.612282<br>C 0.382407 0.934486 2.112326<br>S 1.973703 0.180679 1.521960<br>P 1.687785 0.152323 -0.556767<br>O 0.788163 1.434699 -0.886561<br>C 1.369805 2.745510 -0.861885<br>O -1.375235 2.619564 0.550518<br>O -0.806163 -1.720057 1.910413<br>S 3.352142 -0.007332 -1.542921<br>O 0.548200 -0.933379 -0.842880<br>C 0.847045 -2.337333 -0.703450<br>H 0.441093 2.021778 2.048775<br>H 0.327778 0.619628 3.156871<br>H -3.686389 1.972836 -1.280330<br>H -3.092473 -2.771509 0.237269<br>H -5.183638 0.157052 -2.146103<br>H -4.892092 -2.169258 -1.402791<br>H 1.118197 -2.557184 0.331641<br>H 1.662768 -2.611403 -1.375019<br>H -0.073639 -2.853402 -0.973453<br>H 0.533303 3.437236 -0.942762<br>H 2.061616 2.857403 -1.699408<br>H 1.899143 2.911383 0.082309<br>O 3.732952 -2.084617 0.161706<br>H 4.636410 -1.721453 0.155504 | C -4.176934 -1.495495 -0.953192<br>C -3.265939 -1.678849 0.092660<br>C -2.449836 -0.608503 0.412502<br>C -2.529356 0.601594 -0.268762<br>C -3.428972 0.797104 -1.301881<br>C -4.256897 -0.278997 -1.638339<br>C -1.385867 -0.492189 1.452331<br>N -0.883486 0.812113 1.333919<br>C -1.525823 1.537155 0.316406<br>C 0.245232 1.309186 2.061049<br>S 1.866781 0.479604 1.659832<br>P 1.687316 -0.090578 -0.388028<br>O 0.852706 1.092710 -1.073608<br>C 1.439857 2.390417 -1.254401<br>O -1.298043 2.689293 0.035194<br>O -1.004574 -1.308562 2.255528<br>S 3.357633 -0.448554 -1.571100<br>O 0.520571 -1.193293 -0.487709<br>C 0.828636 -2.519927 -0.012908<br>H 0.319171 2.377383 1.855092<br>H 0.111764 1.130323 3.130139<br>H -3.481244 1.745987 -1.825271<br>H -3.196660 -2.616350 0.634932<br>H -4.974468 -0.170654 -2.445105<br>H -4.834710 -2.309743 -1.239486<br>H 1.055773 -2.487850 1.055760<br>H 1.673499 -2.929520 -0.572055<br>H -0.071980 -3.107528 -0.186382<br>H 0.615613 3.050968 -1.516358<br>H 2.184289 2.349135 -2.052437<br>H 1.905316 2.732386 -0.324445<br>O 3.961813 -1.406816 -0.114839<br>H 4.753289 -0.943084 0.199569 | C -3.887133 -2.111513 0.060649<br>C -3.139482 -1.443302 1.036318<br>C -2.421984 -0.332458 0.630105<br>C -2.442949 0.110024 -0.688361<br>C -3.181566 -0.539287 -1.661677<br>C -3.907349 -1.667496 -1.265167<br>C -1.529494 0.571910 1.413067<br>N -1.068060 1.529180 0.499342<br>C -1.573287 1.318166 -0.791988<br>C -0.088990 2.523845 0.814736<br>S 1.652973 1.889844 1.000287<br>P 1.767632 -0.046449 -0.038378<br>O 0.926371 0.229795 -1.394781<br>C 1.442589 1.145338 -2.368712<br>O -1.345757 2.017989 -1.750047<br>O -1.244168 0.541951 2.585945<br>S 3.173688 -1.653662 -0.969642<br>O 0.611367 -0.932330 0.668673<br>C 0.948244 -1.558987 1.915554<br>H -0.108374 3.268650 0.018809<br>H -0.330335 2.976752 1.778167<br>H -3.188969 -0.184300 -2.686872<br>H -3.118107 -1.775680 2.069201<br>H -4.496753 -2.209764 -1.997393<br>H -4.462148 -2.990111 0.334780<br>H 1.128042 -0.797843 2.680502<br>H 1.824097 -2.203347 1.790021<br>H 0.079825 -2.154936 2.194327<br>H 0.721009 1.151735 -3.183469<br>H 2.421563 0.808648 -2.723992<br>H 1.517663 2.149964 -1.942697<br>O 4.232461 -1.704753 0.334634<br>H 4.994086 -1.144865 0.136029 |

**Table S24.** Vibrational frequencies and rotational constants for the stationary points involved in the H2O-abstraction pathway in gas phase calculated at the M06-2X/6-31+G(d,p) level of theory.

| MCR(H2O-abs)<br>C <sub>1</sub> - <sup>2</sup> A                                                                                                                                                                                                                                                                                                                                                                                                                                                                          | TS(H2O-abs)<br>C <sub>1</sub> - <sup>2</sup> A                                                                                                                                                                                                                                                                                                                                                                                                                                                                                  | MCP(H2O-abs)<br>C <sub>1</sub> - <sup>2</sup> A                                                                                                                                                                                                                                                                                                                                                                                                                                                                      | Rad(H2O-abs)<br>C <sub>1</sub> - <sup>2</sup> A                                                                                                                                                                                                                                                                                                                                                                                                                         |
|--------------------------------------------------------------------------------------------------------------------------------------------------------------------------------------------------------------------------------------------------------------------------------------------------------------------------------------------------------------------------------------------------------------------------------------------------------------------------------------------------------------------------|---------------------------------------------------------------------------------------------------------------------------------------------------------------------------------------------------------------------------------------------------------------------------------------------------------------------------------------------------------------------------------------------------------------------------------------------------------------------------------------------------------------------------------|----------------------------------------------------------------------------------------------------------------------------------------------------------------------------------------------------------------------------------------------------------------------------------------------------------------------------------------------------------------------------------------------------------------------------------------------------------------------------------------------------------------------|-------------------------------------------------------------------------------------------------------------------------------------------------------------------------------------------------------------------------------------------------------------------------------------------------------------------------------------------------------------------------------------------------------------------------------------------------------------------------|
| Vibrational frequencies (cm <sup>-1</sup> )                                                                                                                                                                                                                                                                                                                                                                                                                                                                              | Vibrational frequencies (cm <sup>-1</sup> )                                                                                                                                                                                                                                                                                                                                                                                                                                                                                     | Vibrational frequencies (cm <sup>-1</sup> )                                                                                                                                                                                                                                                                                                                                                                                                                                                                          | Vibrational frequencies (cm <sup>-1</sup> )                                                                                                                                                                                                                                                                                                                                                                                                                             |
| 25, 39, 52, 84, 95, 103, 108, 116, 132, 142, 151, 153, 162, 166, 187, 195, 198, 241, 246, 282, 290, 324, 366, 388, 403, 414, 432, 465, 486, 493, 529, 541, 555, 620, 670, 676, 683, 714, 733, 735, 790, 807, 831, 854, 869, 921, 940, 996, 1020, 1031, 1049, 1092, 1107, 1127, 1142, 1181, 1186, 1189, 1202, 1210, 1214, 1242, 1311, 1320, 1355, 1398, 1446, 1480, 1482!, 1485, 1499, 1501, 1505, 1508, 1517, 1519, 1694, 1698, 1835, 1905, 3076, 3079, 3121, 3160, 3166, 3192, 3194, 3210, 3222, 3232, 3240, 3245, 3665 | <b>1179i</b> , 27, 37, 63, 84, 89, 91, 110, 124, 137, 146, 156, 157, 172, 188, 195, 196, 220, 246, 263, 283, 323, 362, 390, 400, 405, 416, 431, 468, 486, 539, 545, 615, 665, 676, 684, 701, 732, 741, 757, 792, 807, 835, 867, 883, 920, 928, 992, 996, 1030, 1035, 1055, 1092, 1106, 1118, 1143, 1181, 1185, 1189, 1201, 1209, 1213, 1246, 1256, 1312, 1353, 1398, 1437, 1479, 1481, 1484, 1499, 1500, 1505, 1506, 1516, 1517, 1691, 1696, 1841, 1907, 3078, 3082, 3161, 3164, 3170, 3197, 3211, 3222, 3233, 3242, 3247, 3723 | 27, 36, 40, 72, 77, 84, 92, 110, 114, 121, 129, 137, 140, 155, 162, 189, 195, 197, 228, 246, 261, 286, 310, 326, 364, 384, 400, 408, 420, 430, 452, 470, 475, 537, 551, 614, 664, 674, 705, 724, 734, 787, 805, 808, 833, 866, 904, 920, 995, 1031, 1039, 1070, 1094, 1106, 1122, 1145, 1180, 1184, 1187, 1201, 1209, 1213, 1254, 1312, 1338, 1399, 1422, 1480, 1485, 1498, 1500, 1501, 1504, 1516, 1517, 1615, 1692, 1695, 1836, 1906, 3079, 3080, 3162, 3166, 3196, 3210, 3223, 3234, 3242, 3246, 3268, 3801, 3970 | 34, 41, 74, 98, 105, 113, 127, 136, 143, 155, 165, 186, 196, 197, 240, 246, 278, 285, 322, 356, 388, 402, 415, 427, 464, 467, 499, 537, 548, 611, 662, 672, 704, 723, 733, 786, 805, 810, 837, 867, 906, 920, 995, 1030, 1040, 1065, 1093, 1106, 1123, 1144, 1181, 1186, 1188, 1201, 1209, 1214, 1256, 1312, 1349, 1400, 1413, 1482, 1486, 1499, 1501, 1502, 1505, 1515, 1518, 1692, 1695, 1854, 1912, 3079, 3082, 3162, 3170, 3199, 3211, 3221, 3232, 3240, 3245, 3245 |
| Rotational constants (GHz)                                                                                                                                                                                                                                                                                                                                                                                                                                                                                               | Rotational constants (GHz)                                                                                                                                                                                                                                                                                                                                                                                                                                                                                                      | Rotational constants (GHz)                                                                                                                                                                                                                                                                                                                                                                                                                                                                                           | Rotational constants (GHz)                                                                                                                                                                                                                                                                                                                                                                                                                                              |
| 0.40528, 0.22568, 0.20735                                                                                                                                                                                                                                                                                                                                                                                                                                                                                                | 0.39329, 0.22671, 0.20866                                                                                                                                                                                                                                                                                                                                                                                                                                                                                                       | 0.39255, 0.21843, 0.20165                                                                                                                                                                                                                                                                                                                                                                                                                                                                                            | 0.53425, 0.23200, 0.21574                                                                                                                                                                                                                                                                                                                                                                                                                                               |



**Table S25.** Vibrational frequencies and rotational constants for the stationary points involved in the H21-abstraction pathway in gas phase calculated at the M06-2X/6-31+G(d,p) level of theory.

| MCR(H21-abs)<br>$C_1 - ^2A$                                                                                                                                                                                                                                                                                                                                                                                                                                                                                             | TS(H21-abs)<br>$C_1 - ^2A$                                                                                                                                                                                                                                                                                                                                                                                                                                                                                                      | MCP(H21-abs)<br>$C_1 - ^2A$                                                                                                                                                                                                                                                                                                                                                                                                                                                                                          | Rad(H21-abs)<br>$C_1 - ^2A$                                                                                                                                                                                                                                                                                                                                                                                                                                             |
|-------------------------------------------------------------------------------------------------------------------------------------------------------------------------------------------------------------------------------------------------------------------------------------------------------------------------------------------------------------------------------------------------------------------------------------------------------------------------------------------------------------------------|---------------------------------------------------------------------------------------------------------------------------------------------------------------------------------------------------------------------------------------------------------------------------------------------------------------------------------------------------------------------------------------------------------------------------------------------------------------------------------------------------------------------------------|----------------------------------------------------------------------------------------------------------------------------------------------------------------------------------------------------------------------------------------------------------------------------------------------------------------------------------------------------------------------------------------------------------------------------------------------------------------------------------------------------------------------|-------------------------------------------------------------------------------------------------------------------------------------------------------------------------------------------------------------------------------------------------------------------------------------------------------------------------------------------------------------------------------------------------------------------------------------------------------------------------|
| Vibrational frequencies ( $\text{cm}^{-1}$ )                                                                                                                                                                                                                                                                                                                                                                                                                                                                            | Vibrational frequencies ( $\text{cm}^{-1}$ )                                                                                                                                                                                                                                                                                                                                                                                                                                                                                    | Vibrational frequencies ( $\text{cm}^{-1}$ )                                                                                                                                                                                                                                                                                                                                                                                                                                                                         | Vibrational frequencies ( $\text{cm}^{-1}$ )                                                                                                                                                                                                                                                                                                                                                                                                                            |
| 25, 39, 52, 84, 95, 103, 108, 116, 132, 142, 151, 153, 162, 166, 187, 195, 198, 241, 246, 282, 290, 324, 366, 388, 403, 414, 432, 465, 486, 493, 530, 541, 555, 620, 670, 676, 683, 714, 733, 735, 790, 807, 831, 854, 869, 921, 940, 996, 1020, 1031, 1049, 1092, 1107, 1127, 1142, 1181, 1186, 1189, 1202, 1210, 1214, 1242, 1311, 1320, 1355, 1398, 1447, 1480, 1482, 1485, 1499, 1501, 1505, 1508, 1517, 1519, 1694, 1698, 1835, 1905, 3076, 3079, 3121, 3160, 3166, 3192, 3194, 3210, 3222, 3232, 3240, 3245, 3665 | <b>1179i</b> , 27, 37, 63, 84, 88, 91, 110, 124, 137, 146, 156, 157, 172, 188, 195, 196, 220, 246, 263, 283, 323, 362, 390, 400, 405, 416, 431, 468, 486, 539, 545, 615, 665, 676, 684, 701, 732, 741, 757, 792, 807, 835, 867, 883, 920, 928, 992, 996, 1030, 1035, 1055, 1092, 1106, 1118, 1143, 1181, 1185, 1189, 1201, 1209, 1213, 1246, 1256, 1312, 1353, 1398, 1437, 1479, 1481, 1484, 1499, 1500, 1505, 1506, 1516, 1517, 1691, 1696, 1841, 1907, 3078, 3082, 3161, 3164, 3170, 3197, 3211, 3222, 3233, 3242, 3247, 3723 | 27, 36, 40, 72, 77, 84, 91, 110, 114, 120, 129, 137, 140, 155, 162, 189, 195, 197, 229, 246, 261, 286, 310, 326, 364, 384, 400, 408, 420, 430, 452, 470, 475, 537, 551, 614, 664, 674, 705, 724, 734, 787, 805, 808, 833, 866, 904, 920, 995, 1031, 1039, 1070, 1094, 1106, 1122, 1145, 1180, 1184, 1187, 1201, 1209, 1213, 1254, 1312, 1338, 1399, 1422, 1480, 1485, 1498, 1500, 1500, 1504, 1516, 1517, 1615, 1692, 1695, 1836, 1906, 3079, 3080, 3162, 3166, 3196, 3210, 3223, 3234, 3242, 3246, 3268, 3801, 3970 | 34, 41, 74, 98, 105, 113, 127, 136, 143, 155, 165, 186, 196, 197, 240, 246, 278, 285, 322, 356, 388, 402, 415, 427, 464, 467, 499, 537, 548, 611, 662, 672, 704, 723, 733, 786, 805, 810, 837, 867, 906, 920, 995, 1030, 1040, 1065, 1093, 1106, 1123, 1144, 1181, 1186, 1188, 1201, 1209, 1214, 1256, 1312, 1349, 1400, 1413, 1482, 1486, 1499, 1501, 1502, 1505, 1515, 1518, 1692, 1695, 1854, 1912, 3079, 3082, 3162, 3170, 3199, 3211, 3221, 3232, 3240, 3245, 3245 |
| Rotational constants (GHz)                                                                                                                                                                                                                                                                                                                                                                                                                                                                                              | Rotational constants (GHz)                                                                                                                                                                                                                                                                                                                                                                                                                                                                                                      | Rotational constants (GHz)                                                                                                                                                                                                                                                                                                                                                                                                                                                                                           | Rotational constants (GHz)                                                                                                                                                                                                                                                                                                                                                                                                                                              |
| 0.40527, 0.22569, 0.20736                                                                                                                                                                                                                                                                                                                                                                                                                                                                                               | 0.39327, 0.22672, 0.20867                                                                                                                                                                                                                                                                                                                                                                                                                                                                                                       | 0.39256, 0.21841, 0.20164                                                                                                                                                                                                                                                                                                                                                                                                                                                                                            | 0.53425, 0.23200, 0.21574                                                                                                                                                                                                                                                                                                                                                                                                                                               |

**Table S26.** Vibrational frequencies and rotational constants for the stationary points involved in the H22-abstraction pathway in gas phase calculated at the M06-2X/6-31+G(d,p) level of theory.

| MCR(H22-abs)<br>$C_1 - ^2A$                                                                                                                                                                                                                                                                                                                                                                                                                                                                                             | TS(H22-abs)<br>$C_1 - ^2A$                                                                                                                                                                                                                                                                                                                                                                                                                                                                                                       | MCP(H22-abs)<br>$C_1 - ^2A$                                                                                                                                                                                                                                                                                                                                                                                                                                                                                           | Rad(H22-abs)<br>$C_1 - ^2A$                                                                                                                                                                                                                                                                                                                                                                                                                                             |
|-------------------------------------------------------------------------------------------------------------------------------------------------------------------------------------------------------------------------------------------------------------------------------------------------------------------------------------------------------------------------------------------------------------------------------------------------------------------------------------------------------------------------|----------------------------------------------------------------------------------------------------------------------------------------------------------------------------------------------------------------------------------------------------------------------------------------------------------------------------------------------------------------------------------------------------------------------------------------------------------------------------------------------------------------------------------|-----------------------------------------------------------------------------------------------------------------------------------------------------------------------------------------------------------------------------------------------------------------------------------------------------------------------------------------------------------------------------------------------------------------------------------------------------------------------------------------------------------------------|-------------------------------------------------------------------------------------------------------------------------------------------------------------------------------------------------------------------------------------------------------------------------------------------------------------------------------------------------------------------------------------------------------------------------------------------------------------------------|
| Vibrational frequencies ( $\text{cm}^{-1}$ )                                                                                                                                                                                                                                                                                                                                                                                                                                                                            | Vibrational frequencies ( $\text{cm}^{-1}$ )                                                                                                                                                                                                                                                                                                                                                                                                                                                                                     | Vibrational frequencies ( $\text{cm}^{-1}$ )                                                                                                                                                                                                                                                                                                                                                                                                                                                                          | Vibrational frequencies ( $\text{cm}^{-1}$ )                                                                                                                                                                                                                                                                                                                                                                                                                            |
| 29, 43, 63, 79, 87, 91, 100, 116, 126, 141, 149, 157, 170, 189, 190, 200, 211, 230, 239, 280, 282, 322, 367, 389, 404, 413, 431, 436, 465, 488, 528, 541, 553, 623, 669, 676, 686, 713, 733, 736, 789, 808, 830, 847, 869, 925, 937, 1001, 1024, 1033, 1055, 1092, 1107, 1131, 1144, 1184, 1184, 1187, 1205, 1206, 1214, 1242, 1316, 1323, 1355, 1398, 1452, 1474, 1476, 1481, 1500, 1504, 1505, 1507, 1516, 1518, 1690, 1695, 1830, 1903, 3074, 3076, 3119, 3160, 3164, 3181, 3190, 3209, 3221, 3229, 3238, 3245, 3611 | <b>1664i</b> , 26, 40, 53, 82, 95, 105, 114, 125, 142, 145, 153, 162, 172, 185, 192, 195, 236, 239, 275, 283, 322, 352, 379, 393, 404, 430, 437, 455, 473, 491, 538, 561, 622, 653, 669, 683, 709, 732, 739, 772, 786, 830, 838, 844, 866, 927, 937, 956, 1019, 1037, 1079, 1092, 1126, 1140, 1144, 1181, 1186, 1189, 1209, 1214, 1234, 1270, 1321, 1354, 1386, 1430, 1449, 1473, 1480, 1485, 1500, 1502, 1504, 1505, 1507, 1529, 1670, 1695, 1839, 1905, 3076, 3077, 3120, 3160, 3168, 3191, 3191, 3209, 3224, 3239, 3246, 3687 | 28, 38, 64, 76, 81, 89, 97, 114, 120, 128, 137, 143, 154, 162, 185, 189, 193, 215, 228, 240, 278, 282, 316, 334, 367, 390, 406, 431, 435, 457, 486, 515, 538, 549, 619, 657, 667, 684, 710, 730, 741, 779, 807, 833, 843, 867, 933, 939, 1014, 1026, 1069, 1090, 1107, 1132, 1144, 1174, 1186, 1190, 1205, 1213, 1225, 1264, 1320, 1355, 1382, 1443, 1468, 1479, 1483, 1486, 1493, 1500, 1505, 1508, 1510, 1609, 1641, 1695, 1837, 1903, 3074, 3078, 3119, 3158, 3167, 3190, 3203, 3208, 3221, 3235, 3246, 3771, 3969 | 21, 39, 84, 90, 94, 114, 133, 145, 159, 164, 180, 186, 196, 197, 229, 239, 266, 283, 320, 357, 391, 406, 432, 436, 458, 489, 537, 548, 618, 653, 670, 682, 705, 730, 740, 779, 806, 831, 841, 868, 933, 937, 1012, 1026, 1068, 1092, 1108, 1131, 1144, 1173, 1187, 1189, 1210, 1214, 1225, 1262, 1323, 1356, 1377, 1441, 1468, 1480, 1483, 1486, 1491, 1500, 1502, 1505, 1507, 1637, 1694, 1853, 1910, 3077, 3082, 3120, 3160, 3171, 3193, 3196, 3210, 3220, 3233, 3246 |
| Rotational constants (GHz)                                                                                                                                                                                                                                                                                                                                                                                                                                                                                              | Rotational constants (GHz)                                                                                                                                                                                                                                                                                                                                                                                                                                                                                                       | Rotational constants (GHz)                                                                                                                                                                                                                                                                                                                                                                                                                                                                                            | Rotational constants (GHz)                                                                                                                                                                                                                                                                                                                                                                                                                                              |
| 0.39197, 0.23585, 0.20155                                                                                                                                                                                                                                                                                                                                                                                                                                                                                               | 0.41737, 0.22836, 0.20248                                                                                                                                                                                                                                                                                                                                                                                                                                                                                                        | 0.39852, 0.23325, 0.20176                                                                                                                                                                                                                                                                                                                                                                                                                                                                                             | 0.51040, 0.24097, 0.23208                                                                                                                                                                                                                                                                                                                                                                                                                                               |

**Table S27.** Vibrational frequencies and rotational constants for the stationary points involved in the H23-abstraction pathway in gas phase calculated at the M06-2X/6-31+G(d,p) level of theory.

| MCR(H23-abs)<br>$C_1 - ^2A$                                                                                                                                                                                                                                                                                                                                                                                                                                                                                       | TS(H23-abs)<br>$C_1 - ^2A$                                                                                                                                                                                                                                                                                                                                                                                                                                                                                                       | MCP(H23-abs)<br>$C_1 - ^2A$                                                                                                                                                                                                                                                                                                                                                                                                                                                                                           | Rad(H23-abs)<br>$C_1 - ^2A$                                                                                                                                                                                                                                                                                                                                                                                                                                             |
|-------------------------------------------------------------------------------------------------------------------------------------------------------------------------------------------------------------------------------------------------------------------------------------------------------------------------------------------------------------------------------------------------------------------------------------------------------------------------------------------------------------------|----------------------------------------------------------------------------------------------------------------------------------------------------------------------------------------------------------------------------------------------------------------------------------------------------------------------------------------------------------------------------------------------------------------------------------------------------------------------------------------------------------------------------------|-----------------------------------------------------------------------------------------------------------------------------------------------------------------------------------------------------------------------------------------------------------------------------------------------------------------------------------------------------------------------------------------------------------------------------------------------------------------------------------------------------------------------|-------------------------------------------------------------------------------------------------------------------------------------------------------------------------------------------------------------------------------------------------------------------------------------------------------------------------------------------------------------------------------------------------------------------------------------------------------------------------|
| Vibrational frequencies ( $\text{cm}^{-1}$ )                                                                                                                                                                                                                                                                                                                                                                                                                                                                      | Vibrational frequencies ( $\text{cm}^{-1}$ )                                                                                                                                                                                                                                                                                                                                                                                                                                                                                     | Vibrational frequencies ( $\text{cm}^{-1}$ )                                                                                                                                                                                                                                                                                                                                                                                                                                                                          | Vibrational frequencies ( $\text{cm}^{-1}$ )                                                                                                                                                                                                                                                                                                                                                                                                                            |
| 29, 43, 63, 79, 87, 91, 100, 116, 126, 142, 149, 157, 170, 189, 190, 200, 211, 230, 239, 280, 282, 322, 367, 389, 404, 413, 431, 436, 465, 488, 528, 541, 553, 623, 669, 676, 686, 713, 733, 736, 789, 808, 830, 847, 869, 925, 937, 1001, 1024, 1033, 1055, 1092, 1107, 1131, 1144, 1184, 1184, 1187, 1205, 1206, 1214, 1242, 1316, 1323, 1355, 1398, 1452, 1474, 1476, 1481, 1500, 1504, 1505, 1507, 1516, 1518, 1690, 1695, 1830, 1903, 3074, 3076, 3119, 3160, 3164, 3181, 3190, 3209, 3221, 3229, 3238, 3245 | <b>1664i</b> , 26, 40, 53, 81, 95, 105, 113, 125, 142, 145, 153, 162, 171, 185, 192, 195, 236, 239, 275, 283, 322, 352, 379, 393, 404, 430, 437, 455, 473, 491, 538, 561, 622, 653, 669, 683, 709, 732, 739, 772, 786, 830, 838, 844, 866, 927, 937, 956, 1019, 1037, 1079, 1092, 1126, 1140, 1144, 1181, 1186, 1189, 1209, 1214, 1234, 1270, 1321, 1354, 1386, 1430, 1449, 1473, 1480, 1485, 1500, 1502, 1504, 1505, 1507, 1529, 1670, 1695, 1839, 1905, 3076, 3078, 3120, 3160, 3168, 3191, 3191, 3209, 3224, 3239, 3246, 3687 | 28, 38, 65, 76, 81, 89, 97, 114, 120, 129, 137, 143, 154, 162, 185, 189, 193, 215, 228, 240, 278, 282, 316, 334, 367, 390, 406, 431, 435, 457, 486, 515, 538, 549, 619, 657, 667, 684, 710, 730, 741, 779, 807, 833, 843, 867, 933, 939, 1014, 1026, 1069, 1090, 1107, 1132, 1144, 1174, 1186, 1190, 1205, 1214, 1225, 1264, 1320, 1355, 1382, 1443, 1468, 1479, 1483, 1486, 1493, 1500, 1505, 1508, 1510, 1609, 1641, 1695, 1837, 1903, 3074, 3078, 3119, 3158, 3167, 3190, 3203, 3208, 3221, 3235, 3246, 3771, 3968 | 21, 39, 84, 90, 94, 114, 133, 145, 159, 164, 180, 186, 196, 197, 229, 239, 266, 283, 320, 357, 391, 406, 432, 436, 458, 489, 537, 548, 618, 653, 670, 682, 705, 730, 740, 779, 806, 831, 841, 868, 933, 937, 1012, 1026, 1068, 1092, 1108, 1131, 1144, 1173, 1187, 1189, 1210, 1214, 1225, 1262, 1323, 1356, 1377, 1441, 1468, 1480, 1483, 1486, 1491, 1500, 1502, 1505, 1507, 1637, 1694, 1853, 1910, 3077, 3082, 3120, 3160, 3171, 3193, 3196, 3210, 3220, 3233, 3246 |
| Rotational constants (GHz)                                                                                                                                                                                                                                                                                                                                                                                                                                                                                        | Rotational constants (GHz)                                                                                                                                                                                                                                                                                                                                                                                                                                                                                                       | Rotational constants (GHz)                                                                                                                                                                                                                                                                                                                                                                                                                                                                                            | Rotational constants (GHz)                                                                                                                                                                                                                                                                                                                                                                                                                                              |
| 0.39194, 0.23586, 0.20156                                                                                                                                                                                                                                                                                                                                                                                                                                                                                         | 0.41735, 0.22836, 0.20249                                                                                                                                                                                                                                                                                                                                                                                                                                                                                                        | 0.39850, 0.23326, 0.20178                                                                                                                                                                                                                                                                                                                                                                                                                                                                                             | 0.51040, 0.24096, 0.23208                                                                                                                                                                                                                                                                                                                                                                                                                                               |

**Table S28.** Vibrational frequencies and rotational constants for the stationary points involved in the H24-abstraction pathway in gas phase calculated at the M06-2X/6-31+G(d,p) level of theory.

| MCR(H24-abs)<br>C <sub>1</sub> - <sup>2</sup> A                                                                                                                                                                                                                                                                                                                                                                                                                                                                        | TS(H24-abs)<br>C <sub>1</sub> - <sup>2</sup> A                                                                                                                                                                                                                                                                                                                                                                                                                                                                                  | MCP(H24-abs)<br>C <sub>1</sub> - <sup>2</sup> A                                                                                                                                                                                                                                                                                                                                                                                                                                                                       | Rad(H24-abs)<br>C <sub>1</sub> - <sup>2</sup> A                                                                                                                                                                                                                                                                                                                                                                                                                        |
|------------------------------------------------------------------------------------------------------------------------------------------------------------------------------------------------------------------------------------------------------------------------------------------------------------------------------------------------------------------------------------------------------------------------------------------------------------------------------------------------------------------------|---------------------------------------------------------------------------------------------------------------------------------------------------------------------------------------------------------------------------------------------------------------------------------------------------------------------------------------------------------------------------------------------------------------------------------------------------------------------------------------------------------------------------------|-----------------------------------------------------------------------------------------------------------------------------------------------------------------------------------------------------------------------------------------------------------------------------------------------------------------------------------------------------------------------------------------------------------------------------------------------------------------------------------------------------------------------|------------------------------------------------------------------------------------------------------------------------------------------------------------------------------------------------------------------------------------------------------------------------------------------------------------------------------------------------------------------------------------------------------------------------------------------------------------------------|
| Vibrational frequencies (cm <sup>-1</sup> )                                                                                                                                                                                                                                                                                                                                                                                                                                                                            | Vibrational frequencies (cm <sup>-1</sup> )                                                                                                                                                                                                                                                                                                                                                                                                                                                                                     | Vibrational frequencies (cm <sup>-1</sup> )                                                                                                                                                                                                                                                                                                                                                                                                                                                                           | Vibrational frequencies (cm <sup>-1</sup> )                                                                                                                                                                                                                                                                                                                                                                                                                            |
| 14, 30, 39, 78, 85, 92, 108, 112, 133, 138, 140, 153, 167, 172, 187, 194, 202, 229, 239, 266, 289, 319, 356, 390, 399, 408, 420, 438, 464, 478, 499, 539, 549, 620, 673, 675, 680, 704, 731, 732, 790, 804, 824, 842, 866, 918, 936, 993, 1026, 1028, 1050, 1080, 1105, 1126, 1137, 1181, 1185, 1190, 1201, 1210, 1216, 1242, 1311, 1328, 1356, 1399, 1448, 1467, 1482, 1486, 1497, 1498, 1503, 1505, 1515, 1515, 1690, 1693, 1851, 1907, 3081, 3087, 3122, 3166, 3181, 3195, 3200, 3212, 3225, 3235, 3243, 3248, 3679 | <b>1407i</b> , 17, 28, 56, 66, 82, 93, 97, 111, 126, 141, 154, 160, 163, 182, 187, 194, 201, 230, 238, 263, 282, 317, 331, 376, 393, 403, 426, 433, 474, 493, 540, 575, 619, 652, 669, 684, 694, 730, 750, 772, 786, 832, 857, 868, 870, 933, 941, 1002, 1032, 1049, 1080, 1092, 1123, 1131, 1142, 1185, 1189, 1190, 1209, 1213, 1233, 1276, 1292, 1325, 1355, 1384, 1446, 1469, 1471, 1478, 1483, 1498, 1499, 1504, 1506, 1509, 1673, 1687, 1853, 1910, 3079, 3083, 3122, 3163, 3171, 3194, 3196, 3210, 3229, 3241, 3242, 3806 | 17, 21, 43, 52, 82, 89, 99, 101, 110, 122, 129, 143, 148, 153, 159, 163, 176, 188, 195, 201, 231, 239, 265, 284, 319, 358, 391, 402, 410, 432, 475, 487, 537, 547, 618, 658, 669, 681, 705, 727, 746, 785, 829, 837, 854, 867, 906, 929, 1002, 1028, 1044, 1094, 1106, 1126, 1144, 1182, 1186, 1190, 1210, 1214, 1227, 1266, 1325, 1354, 1383, 1444, 1450, 1467, 1480, 1484, 1488, 1499, 1501, 1502, 1506, 1605, 1646, 1688, 1851, 1908, 3078, 3082, 3120, 3161, 3170, 3192, 3196, 3210, 3228, 3236, 3239, 3864, 3991 | 13, 39, 78, 86, 95, 109, 123, 140, 154, 158, 166, 187, 194, 200, 229, 239, 264, 283, 319, 356, 390, 402, 409, 431, 472, 489, 537, 546, 618, 655, 669, 681, 704, 726, 744, 785, 829, 834, 840, 868, 907, 929, 989, 1028, 1042, 1093, 1103, 1127, 1143, 1183, 1185, 1189, 1209, 1213, 1226, 1265, 1324, 1355, 1383, 1443, 1449, 1468, 1479, 1483, 1487, 1497, 1500, 1504, 1506, 1647, 1689, 1852, 1909, 3077, 3082, 3120, 3161, 3170, 3192, 3196, 3210, 3225, 3237, 3239 |
| Rotational constants (GHz)                                                                                                                                                                                                                                                                                                                                                                                                                                                                                             | Rotational constants (GHz)                                                                                                                                                                                                                                                                                                                                                                                                                                                                                                      | Rotational constants (GHz)                                                                                                                                                                                                                                                                                                                                                                                                                                                                                            | Rotational constants (GHz)                                                                                                                                                                                                                                                                                                                                                                                                                                             |
| 0.44329, 0.23031, 0.21851                                                                                                                                                                                                                                                                                                                                                                                                                                                                                              | 0.44432, 0.18440, 0.17977                                                                                                                                                                                                                                                                                                                                                                                                                                                                                                       | 0.45612, 0.17233, 0.16885                                                                                                                                                                                                                                                                                                                                                                                                                                                                                             | 0.51114, 0.24346, 0.23226                                                                                                                                                                                                                                                                                                                                                                                                                                              |

**Table S29.** Vibrational frequencies and rotational constants for the stationary points involved in the H25-abstraction pathway in gas phase calculated at the M06-2X/6-31+G(d,p) level of theory.

| MCR(H25-abs)<br>C <sub>1</sub> – <sup>2</sup> A                                                                                                                                                                                                                                                                                                                                                                                                                                                                        | TS(H25-abs)<br>C <sub>1</sub> – <sup>2</sup> A                                                                                                                                                                                                                                                                                                                                                                                                                                                                                 | MCP(H25-abs)<br>C <sub>1</sub> – <sup>2</sup> A                                                                                                                                                                                                                                                                                                                                                                                                                                                                      | Rad(H25-abs)<br>C <sub>1</sub> – <sup>2</sup> A                                                                                                                                                                                                                                                                                                                                                                                                                        |
|------------------------------------------------------------------------------------------------------------------------------------------------------------------------------------------------------------------------------------------------------------------------------------------------------------------------------------------------------------------------------------------------------------------------------------------------------------------------------------------------------------------------|--------------------------------------------------------------------------------------------------------------------------------------------------------------------------------------------------------------------------------------------------------------------------------------------------------------------------------------------------------------------------------------------------------------------------------------------------------------------------------------------------------------------------------|----------------------------------------------------------------------------------------------------------------------------------------------------------------------------------------------------------------------------------------------------------------------------------------------------------------------------------------------------------------------------------------------------------------------------------------------------------------------------------------------------------------------|------------------------------------------------------------------------------------------------------------------------------------------------------------------------------------------------------------------------------------------------------------------------------------------------------------------------------------------------------------------------------------------------------------------------------------------------------------------------|
| Vibrational frequencies (cm <sup>-1</sup> )                                                                                                                                                                                                                                                                                                                                                                                                                                                                            | Vibrational frequencies (cm <sup>-1</sup> )                                                                                                                                                                                                                                                                                                                                                                                                                                                                                    | Vibrational frequencies (cm <sup>-1</sup> )                                                                                                                                                                                                                                                                                                                                                                                                                                                                          | Vibrational frequencies (cm <sup>-1</sup> )                                                                                                                                                                                                                                                                                                                                                                                                                            |
| 14, 30, 39, 77, 85, 92, 108, 112, 133, 138, 139, 153, 167, 172, 187, 194, 202, 229, 239, 266, 289, 319, 356, 390, 399, 408, 420, 438, 464, 478, 499, 539, 549, 620, 673, 675, 680, 704, 731, 732, 790, 804, 824, 842, 866, 918, 936, 993, 1026, 1028, 1050, 1080, 1105, 1126, 1137, 1181, 1185, 1190, 1201, 1210, 1216, 1242, 1311, 1328, 1356, 1399, 1448, 1467, 1482, 1486, 1497, 1498, 1503, 1504, 1515, 1515, 1690, 1693, 1851, 1907, 3081, 3087, 3122, 3166, 3181, 3195, 3200, 3212, 3225, 3235, 3243, 3248, 3679 | <b>1400i</b> , 18, 28, 57, 63, 83, 90, 93, 111, 131, 139, 148, 150, 159, 164, 189, 195, 201, 227, 239, 263, 285, 317, 331, 376, 393, 402, 427, 432, 473, 494, 545, 571, 619, 651, 668, 680, 706, 730, 740 ,777, 787, 831, 856, 865, 868, 931, 940, 999, 1033, 1055, 1077, 1092, 1123, 1131, 1143, 1186, 1189, 1189, 1208, 1213, 1232, 1274, 1293, 1325, 1355, 1384, 1445, 1466, 1472, 1481, 1484, 1498, 1499, 1502, 1506, 1508, 1672, 1687, 1853, 1910, 3078, 3082, 3121, 3162, 3170, 3193, 3195, 3210, 3229, 3237, 3243, 3807 | 16, 23, 42, 52, 80, 88, 90, 92, 109, 119, 123, 135, 144, 148, 158, 162 ,186, 188, 195, 200, 233, 239, 265, 285, 319, 358, 391, 401, 410, 432, 476, 488, 541, 545, 619, 657, 667, 682, 704, 727, 746, 785, 829, 838, 854, 866, 905, 930, 1003, 1028, 1043, 1093, 1107, 1126, 1144, 1183, 1186, 1190, 1209, 1214, 1227, 1266, 1325, 1354, 1383, 1442, 1451, 1468, 1480, 1484, 1488, 1498, 1499, 1502, 1505, 1606, 1646, 1686, 1851, 1908, 3078, 3082, 3120, 3162, 3170, 3193, 3196, 3210, 3232, 3233, 3244, 3865, 3991 | 18, 38, 83, 87, 96, 112, 132, 143, 157, 158, 164, 187, 195, 200, 229, 239, 263, 282, 319, 357, 390, 401, 409, 431, 473, 488, 539, 543, 618, 655, 667, 682, 704, 726, 744, 785, 829, 837, 838, 866, 907, 929, 990, 1027, 1042, 1093, 1103, 1126, 1144, 1183, 1185, 1189, 1209, 1214, 1226, 1266, 1324, 1353, 1383, 1441, 1449, 1468, 1481, 1483, 1488, 1499, 1501, 1504, 1507, 1647, 1688, 1852, 1909, 3077, 3082, 3120, 3160, 3170, 3192, 3197, 3210, 3225, 3235, 3240 |
| Rotational constants (GHz)                                                                                                                                                                                                                                                                                                                                                                                                                                                                                             | Rotational constants (GHz)                                                                                                                                                                                                                                                                                                                                                                                                                                                                                                     | Rotational constants (GHz)                                                                                                                                                                                                                                                                                                                                                                                                                                                                                           | Rotational constants (GHz)                                                                                                                                                                                                                                                                                                                                                                                                                                             |
| 0.44328, 0.23032, 0.21852                                                                                                                                                                                                                                                                                                                                                                                                                                                                                              | 0.44612, 0.18779, 0.17641                                                                                                                                                                                                                                                                                                                                                                                                                                                                                                      | 0.45657, 0.17237, 0.16845                                                                                                                                                                                                                                                                                                                                                                                                                                                                                            | 0.51085, 0.24319, 0.23298                                                                                                                                                                                                                                                                                                                                                                                                                                              |

**Table S30.** Vibrational frequencies and rotational constants for the stationary points involved in the H26-abstraction pathway in gas phase calculated at the M06-2X/6-31+G(d,p) level of theory.

| MCR(H26-abs)<br>$C_1 - ^2A$                                                                                                                                                                                                                                                                                                                                                                                                                                                                                             | TS(H26-abs)<br>$C_1 - ^2A$                                                                                                                                                                                                                                                                                                                                                                                                                                                                                                      | MCP(H26-abs)<br>$C_1 - ^2A$                                                                                                                                                                                                                                                                                                                                                                                                                                                                                           | Rad(H26-abs)<br>$C_1 - ^2A$                                                                                                                                                                                                                                                                                                                                                                                                                                            |
|-------------------------------------------------------------------------------------------------------------------------------------------------------------------------------------------------------------------------------------------------------------------------------------------------------------------------------------------------------------------------------------------------------------------------------------------------------------------------------------------------------------------------|---------------------------------------------------------------------------------------------------------------------------------------------------------------------------------------------------------------------------------------------------------------------------------------------------------------------------------------------------------------------------------------------------------------------------------------------------------------------------------------------------------------------------------|-----------------------------------------------------------------------------------------------------------------------------------------------------------------------------------------------------------------------------------------------------------------------------------------------------------------------------------------------------------------------------------------------------------------------------------------------------------------------------------------------------------------------|------------------------------------------------------------------------------------------------------------------------------------------------------------------------------------------------------------------------------------------------------------------------------------------------------------------------------------------------------------------------------------------------------------------------------------------------------------------------|
| Vibrational frequencies ( $\text{cm}^{-1}$ )                                                                                                                                                                                                                                                                                                                                                                                                                                                                            | Vibrational frequencies ( $\text{cm}^{-1}$ )                                                                                                                                                                                                                                                                                                                                                                                                                                                                                    | Vibrational frequencies ( $\text{cm}^{-1}$ )                                                                                                                                                                                                                                                                                                                                                                                                                                                                          | Vibrational frequencies ( $\text{cm}^{-1}$ )                                                                                                                                                                                                                                                                                                                                                                                                                           |
| 25, 39, 52, 84, 95, 103, 108, 116, 132, 142, 151, 153, 162, 166, 187, 195, 198, 241, 246, 282, 290, 324, 366, 388, 403, 414, 432, 465, 486, 493, 529, 541, 555, 620, 670, 676, 683, 714, 733, 735, 790, 807, 831, 854, 869, 921, 940, 996, 1020, 1031, 1049, 1092, 1107, 1127, 1142, 1181, 1186, 1189, 1202, 1210, 1214, 1242, 1311, 1320, 1355, 1398, 1447, 1480, 1482, 1485, 1499, 1501, 1505, 1508, 1517, 1519, 1694, 1698, 1835, 1905, 3076, 3079, 3121, 3161, 3166, 3192, 3194, 3210, 3222, 3232, 3240, 3245, 3665 | <b>1192i</b> , 28, 38, 56, 80, 89, 96, 109, 120, 137, 146, 153, 169, 190, 196, 201, 230, 238, 261, 278, 289, 320, 334, 358, 387, 403, 414, 434, 468, 492, 538, 545, 619, 670, 679, 685, 713, 733, 736, 772, 794, 808, 827, 849, 861, 889, 922, 936, 997, 1021, 1033, 1048, 1106, 1110, 1129, 1156, 1181, 1185, 1189, 1201, 1208, 1215, 1241, 1310, 1320, 1354, 1359, 1397, 1447, 1468, 1472, 1482, 1486, 1502, 1509, 1517, 1517, 1693, 1696, 1844, 1906, 3073, 3112, 3113, 3158, 3184, 3208, 3209, 3222, 3233, 3241, 3247, 3738 | 38, 39, 64, 82, 95, 108, 117, 126, 133, 143, 146, 162, 168, 187, 196, 203, 232, 239, 248, 264, 292, 298, 318, 328, 362, 391, 407, 414, 431, 468, 491, 500, 541, 550, 621, 669, 676, 677, 679, 704, 733, 734, 792, 807, 819, 846, 863, 920, 943, 996, 1024, 1031, 1049, 1105, 1107, 1129, 1181, 1188, 1189, 1202, 1210, 1238, 1243, 1312, 1332, 1357, 1397, 1449, 1472, 1484, 1486, 1497, 1503, 1517, 1518, 1615, 1693, 1697, 1843, 1906, 3085, 3126, 3173, 3178, 3200, 3203, 3222, 3233, 3242, 3246, 3334, 3818, 3940 | 36, 42, 81, 98, 108, 121, 130, 149, 158, 167, 187, 196, 197, 224, 231, 242, 262, 287, 320, 357, 389, 404, 415, 429, 467, 493, 537, 545, 601, 617, 672, 678, 684, 714, 732, 736, 793, 807, 823, 848, 861, 922, 937, 996, 1021, 1030, 1048, 1106, 1109, 1129, 1180, 1183, 1190, 1201, 1212, 1237, 1242, 1309, 1318, 1351, 1395, 1443, 1468, 1473, 1485, 1502, 1506, 1516, 1517, 1692, 1697, 1852, 1909, 3080, 3114, 3169, 3184, 3186, 3194, 3220, 3232, 3240, 3246, 3343 |
| Rotational constants (GHz)                                                                                                                                                                                                                                                                                                                                                                                                                                                                                              | Rotational constants (GHz)                                                                                                                                                                                                                                                                                                                                                                                                                                                                                                      | Rotational constants (GHz)                                                                                                                                                                                                                                                                                                                                                                                                                                                                                            | Rotational constants (GHz)                                                                                                                                                                                                                                                                                                                                                                                                                                             |
| 0.40528, 0.22569, 0.20735                                                                                                                                                                                                                                                                                                                                                                                                                                                                                               | 0.41609, 0.23149, 0.20460                                                                                                                                                                                                                                                                                                                                                                                                                                                                                                       | 0.40287, 0.23133, 0.20282                                                                                                                                                                                                                                                                                                                                                                                                                                                                                             | 0.52229, 0.23760, 0.22659                                                                                                                                                                                                                                                                                                                                                                                                                                              |

**Table S31.** Vibrational frequencies and rotational constants for the stationary points involved in the H27-abstraction pathway in gas phase calculated at the M06-2X/6-31+G(d,p) level of theory.

| MCR(H27-abs)<br>$C_1 - ^2A$                                                                                                                                                                                                                                                                                                                                                                                                                                                                                           | TS(H27-abs)<br>$C_1 - ^2A$                                                                                                                                                                                                                                                                                                                                                                                                                                                                                                      | MCP(H27-abs)<br>$C_1 - ^2A$                                                                                                                                                                                                                                                                                                                                                                                                                                                                                          | Rad(H27-abs)<br>$C_1 - ^2A$                                                                                                                                                                                                                                                                                                                                                                                                                                            |
|-----------------------------------------------------------------------------------------------------------------------------------------------------------------------------------------------------------------------------------------------------------------------------------------------------------------------------------------------------------------------------------------------------------------------------------------------------------------------------------------------------------------------|---------------------------------------------------------------------------------------------------------------------------------------------------------------------------------------------------------------------------------------------------------------------------------------------------------------------------------------------------------------------------------------------------------------------------------------------------------------------------------------------------------------------------------|----------------------------------------------------------------------------------------------------------------------------------------------------------------------------------------------------------------------------------------------------------------------------------------------------------------------------------------------------------------------------------------------------------------------------------------------------------------------------------------------------------------------|------------------------------------------------------------------------------------------------------------------------------------------------------------------------------------------------------------------------------------------------------------------------------------------------------------------------------------------------------------------------------------------------------------------------------------------------------------------------|
| Vibrational frequencies ( $\text{cm}^{-1}$ )                                                                                                                                                                                                                                                                                                                                                                                                                                                                          | Vibrational frequencies ( $\text{cm}^{-1}$ )                                                                                                                                                                                                                                                                                                                                                                                                                                                                                    | Vibrational frequencies ( $\text{cm}^{-1}$ )                                                                                                                                                                                                                                                                                                                                                                                                                                                                         | Vibrational frequencies ( $\text{cm}^{-1}$ )                                                                                                                                                                                                                                                                                                                                                                                                                           |
| 18, 30, 44, 58, 72, 86, 93, 108, 117, 129, 139, 150, 163, 183, 187, 196, 201, 230, 239, 265, 283, 316, 348, 356, 374, 393, 407, 415, 431, 467, 497, 539, 549, 619, 669, 678, 679, 706, 732, 733, 793, 807, 835, 846, 862, 920, 936, 995, 1026, 1030, 1051, 1089, 1106, 1127, 1141, 1181, 1186, 1192, 1201, 1208, 1213, 1243, 1312, 1326, 1355, 1398, 1447, 1468, 1482, 1487, 1495, 1498, 1498, 1503, 1517, 1518, 1692, 1698, 1852, 1908, 3079, 3089, 3123, 3163, 3180, 3196, 3207, 3214, 3223, 3233, 3241, 3246, 3679 | <b>1147i</b> , 20, 31, 42, 83, 84, 96, 100, 124, 134, 139, 152, 158, 184, 191, 195, 228, 237, 263, 266, 290, 319, 337, 357, 390, 402, 413, 429, 466, 491, 539, 548, 619, 666, 677, 679, 707, 732, 733, 785, 792, 807, 819, 844, 866, 921, 923, 937, 996, 1025, 1031, 1050, 1106, 1111, 1127, 1150, 1181, 1184, 1187, 1201, 1212, 1220, 1242, 1312, 1326, 1341, 1355, 1398, 1447, 1452, 1468, 1481, 1493, 1500, 1506, 1517, 1518, 1693, 1698, 1852, 1909, 3079, 3110, 3121, 3164, 3194, 3209, 3213, 3223, 3232, 3240, 3246, 3730 | 25, 30, 45, 60, 83, 94, 112, 120, 131, 139, 152, 160, 169, 186, 193, 200, 220, 229, 241, 253, 261, 291, 298, 322, 358, 372, 393, 407, 415, 431, 467, 497, 537, 545, 608, 617, 673, 678, 681, 712, 731, 734, 793, 808, 821, 846, 858, 922, 936, 997, 1021, 1032, 1049, 1091, 1106, 1127, 1180, 1182, 1192, 1201, 1211, 1233, 1242, 1309, 1318, 1348, 1396, 1442, 1469, 1470, 1486, 1497, 1499, 1516, 1517, 1632, 1692, 1696, 1852, 1909, 3087, 3113, 3182, 3184, 3186, 3200, 3223, 3233, 3241, 3247, 3347, 3845, 3950 | 36, 42, 81, 98, 108, 121, 130, 149, 158, 167, 187, 196, 198, 224, 231, 242, 262, 287, 320, 357, 389, 404, 415, 429, 467, 493, 537, 545, 601, 617, 672, 678, 684, 714, 732, 736, 793, 807, 823, 848, 861, 922, 937, 996, 1021, 1030, 1048, 1106, 1109, 1129, 1180, 1183, 1190, 1201, 1212, 1237, 1242, 1309, 1318, 1351, 1395, 1443, 1468, 1473, 1485, 1502, 1506, 1516, 1517, 1692, 1697, 1852, 1909, 3080, 3114, 3169, 3184, 3186, 3194, 3220, 3232, 3240, 3246, 3343 |
| Rotational constants (GHz)                                                                                                                                                                                                                                                                                                                                                                                                                                                                                            | Rotational constants (GHz)                                                                                                                                                                                                                                                                                                                                                                                                                                                                                                      | Rotational constants (GHz)                                                                                                                                                                                                                                                                                                                                                                                                                                                                                           | Rotational constants (GHz)                                                                                                                                                                                                                                                                                                                                                                                                                                             |
| 0.40835, 0.23048, 0.21111                                                                                                                                                                                                                                                                                                                                                                                                                                                                                             | 0.39934, 0.22630, 0.19859                                                                                                                                                                                                                                                                                                                                                                                                                                                                                                       | 0.40932, 0.22896, 0.20790                                                                                                                                                                                                                                                                                                                                                                                                                                                                                            | 0.52232, 0.23758, 0.22656                                                                                                                                                                                                                                                                                                                                                                                                                                              |

**Table S32.** Vibrational frequencies and rotational constants for the stationary points involved in the H28-abstraction pathway in gas phase calculated at the M06-2X/6-31+G(d,p) level of theory.

| MCR(H28-abs)<br>C <sub>1</sub> - <sup>2</sup> A                                                                                                                                                                                                                                                                                                                                                                                                                                                                        | TS(H28-abs)<br>C <sub>1</sub> - <sup>2</sup> A                                                                                                                                                                                                                                                                                                                                                                                                                                                                                   | MCP(H28-abs)<br>C <sub>1</sub> - <sup>2</sup> A                                                                                                                                                                                                                                                                                                                                                                                                                                                                      | Rad(H28-abs)<br>C <sub>1</sub> - <sup>2</sup> A                                                                                                                                                                                                                                                                                                                                                                                                                        |
|------------------------------------------------------------------------------------------------------------------------------------------------------------------------------------------------------------------------------------------------------------------------------------------------------------------------------------------------------------------------------------------------------------------------------------------------------------------------------------------------------------------------|----------------------------------------------------------------------------------------------------------------------------------------------------------------------------------------------------------------------------------------------------------------------------------------------------------------------------------------------------------------------------------------------------------------------------------------------------------------------------------------------------------------------------------|----------------------------------------------------------------------------------------------------------------------------------------------------------------------------------------------------------------------------------------------------------------------------------------------------------------------------------------------------------------------------------------------------------------------------------------------------------------------------------------------------------------------|------------------------------------------------------------------------------------------------------------------------------------------------------------------------------------------------------------------------------------------------------------------------------------------------------------------------------------------------------------------------------------------------------------------------------------------------------------------------|
| Vibrational frequencies (cm <sup>-1</sup> )                                                                                                                                                                                                                                                                                                                                                                                                                                                                            | Vibrational frequencies (cm <sup>-1</sup> )                                                                                                                                                                                                                                                                                                                                                                                                                                                                                      | Vibrational frequencies (cm <sup>-1</sup> )                                                                                                                                                                                                                                                                                                                                                                                                                                                                          | Vibrational frequencies (cm <sup>-1</sup> )                                                                                                                                                                                                                                                                                                                                                                                                                            |
| 14, 30, 39, 78, 85, 92, 108, 112, 133, 138, 139, 153, 167, 172, 187, 194, 202, 229, 239, 266, 289, 319, 356, 390, 399, 408, 420, 438, 464, 477, 499, 539, 549, 620, 673, 675, 680, 704, 731, 732, 790, 804, 824, 842, 866, 918, 936, 993, 1026, 1028, 1050, 1080, 1105, 1126, 1136, 1181, 1185, 1190, 1201, 1210, 1216, 1242, 1311, 1328, 1356, 1399, 1448, 1467, 1482, 1486, 1497, 1498, 1503, 1504, 1515, 1515, 1690, 1693, 1851, 1907, 3081, 3087, 3122, 3166, 3181, 3195, 3200, 3212, 3225, 3235, 3243, 3248, 3680 | <b>1158i</b> , 18, 33, 57, 72, 88, 100, 103, 111, 127, 144, 161, 163, 178, 191, 198, 226, 236, 249, 262, 279, 313, 323, 356, 382, 403, 417, 420, 467, 491, 539, 547, 619, 662, 677, 680, 708, 730, 732, 737, 793, 809, 840, 844, 880, 918, 928, 936, 997, 1025, 1032, 1050, 1104, 1107, 1128, 1153, 1170, 1181, 1186, 1202, 1211, 1242, 1296, 1312, 1315, 1326, 1355, 1396, 1447, 1466, 1478, 1482, 1499, 1505, 1515, 1516, 1574, 1689, 1695, 1851, 1908, 3080, 3103, 3119, 3164, 3192, 3199, 3215, 3222, 3235, 3244, 3251, 3772 | 37, 42, 60, 74, 84, 92, 105, 114, 120, 135, 140, 146, 159, 172, 195, 203, 207, 229, 240, 259, 269, 284, 325, 338, 365, 390, 406, 413, 435, 465, 493, 521, 536, 547, 621, 651, 676, 679, 685, 713, 732, 737, 791, 807, 817, 847, 862, 917, 937, 994, 1020, 1031, 1052, 1105, 1108, 1131, 1182, 1188, 1190, 1204, 1210, 1228, 1241, 1312, 1319, 1350, 1397, 1446, 1470, 1476, 1484, 1502, 1504, 1515, 1518, 1639, 1691, 1694, 1839, 1903, 3081, 3114, 3171, 3181, 3184, 3195, 3223, 3233, 3242, 3250, 3336, 3828, 3937 | 36, 42, 81, 98, 108, 120, 130, 149, 158, 166, 187, 196, 197, 224, 231, 242, 262, 287, 320, 357, 389, 404, 415, 429, 467, 492, 537, 545, 600, 617, 672, 678, 684, 714, 732, 736, 792, 807, 823, 848, 861, 922, 937, 996, 1021, 1030, 1048, 1106, 1109, 1129, 1180, 1183, 1190, 1201, 1212, 1237, 1242, 1309, 1318, 1351, 1395, 1443, 1467, 1473, 1485, 1502, 1506, 1516, 1517, 1692, 1697, 1851, 1909, 3080, 3114, 3169, 3184, 3186, 3194, 3220, 3232, 3240, 3246, 3343 |
| Rotational constants (GHz)                                                                                                                                                                                                                                                                                                                                                                                                                                                                                             | Rotational constants (GHz)                                                                                                                                                                                                                                                                                                                                                                                                                                                                                                       | Rotational constants (GHz)                                                                                                                                                                                                                                                                                                                                                                                                                                                                                           | Rotational constants (GHz)                                                                                                                                                                                                                                                                                                                                                                                                                                             |
| 0.44324, 0.23031, 0.21853                                                                                                                                                                                                                                                                                                                                                                                                                                                                                              | 0.42052, 0.23272, 0.20672                                                                                                                                                                                                                                                                                                                                                                                                                                                                                                        | 0.41815, 0.23128, 0.20891                                                                                                                                                                                                                                                                                                                                                                                                                                                                                            | 0.52231, 0.23757, 0.22655                                                                                                                                                                                                                                                                                                                                                                                                                                              |



**Table S33.** Vibrational frequencies and rotational constants for the stationary points involved in the H29-abstraction pathway in gas phase calculated at the M06-2X/6-31+G(d,p) level of theory.

| MCR(H29-abs)<br>C <sub>1</sub> - <sup>2</sup> A                                                                                                                                                                                                                                                                                                                                                                                                                                                                        | TS(H29-abs)<br>C <sub>1</sub> - <sup>2</sup> A                                                                                                                                                                                                                                                                                                                                                                                                                                                                                   | MCP(H29-abs)<br>C <sub>1</sub> - <sup>2</sup> A                                                                                                                                                                                                                                                                                                                                                                                                                                                                      | Rad(H29-abs)<br>C <sub>1</sub> - <sup>2</sup> A                                                                                                                                                                                                                                                                                                                                                                                                                        |
|------------------------------------------------------------------------------------------------------------------------------------------------------------------------------------------------------------------------------------------------------------------------------------------------------------------------------------------------------------------------------------------------------------------------------------------------------------------------------------------------------------------------|----------------------------------------------------------------------------------------------------------------------------------------------------------------------------------------------------------------------------------------------------------------------------------------------------------------------------------------------------------------------------------------------------------------------------------------------------------------------------------------------------------------------------------|----------------------------------------------------------------------------------------------------------------------------------------------------------------------------------------------------------------------------------------------------------------------------------------------------------------------------------------------------------------------------------------------------------------------------------------------------------------------------------------------------------------------|------------------------------------------------------------------------------------------------------------------------------------------------------------------------------------------------------------------------------------------------------------------------------------------------------------------------------------------------------------------------------------------------------------------------------------------------------------------------|
| Vibrational frequencies (cm <sup>-1</sup> )                                                                                                                                                                                                                                                                                                                                                                                                                                                                            | Vibrational frequencies (cm <sup>-1</sup> )                                                                                                                                                                                                                                                                                                                                                                                                                                                                                      | Vibrational frequencies (cm <sup>-1</sup> )                                                                                                                                                                                                                                                                                                                                                                                                                                                                          | Vibrational frequencies (cm <sup>-1</sup> )                                                                                                                                                                                                                                                                                                                                                                                                                            |
| 14, 30, 39, 78, 85, 92, 108, 112, 133, 138, 139, 153, 167, 172, 187, 194, 202, 229, 239, 266, 289, 319, 356, 390, 399, 408, 420, 438, 464, 478, 499, 539, 549, 620, 673, 675, 680, 704, 731, 732, 790, 804, 824, 842, 866, 918, 936, 993, 1026, 1028, 1050, 1080, 1105, 1126, 1137, 1181, 1185, 1190, 1201, 1210, 1216, 1242, 1311, 1328, 1356, 1399, 1448, 1467, 1482, 1486, 1497, 1498, 1503, 1504, 1515, 1515, 1690, 1693, 1851, 1907, 3081, 3087, 3122, 3166, 3181, 3195, 3200, 3212, 3225, 3235, 3243, 3248, 3680 | <b>1158i</b> , 18, 33, 57, 72, 89, 100, 103, 111, 127, 144, 161, 163, 178, 191, 198, 226, 236, 249, 262, 279, 314, 323, 356, 382, 403, 417, 420, 467, 491, 539, 547, 619, 662, 677, 680, 708, 730, 733, 737, 793, 809, 840, 844, 880, 918, 928, 936, 998, 1025, 1032, 1050, 1104, 1107, 1128, 1153, 1170, 1181, 1187, 1202, 1211, 1242, 1296, 1312, 1315, 1326, 1355, 1396, 1447, 1466, 1478, 1483, 1499, 1505, 1515, 1516, 1574, 1689, 1695, 1851, 1908, 3080, 3103, 3119, 3164, 3191, 3199, 3215, 3222, 3235, 3244, 3251, 3772 | 38, 42, 60, 74, 84, 92, 105, 114, 120, 135, 140, 146, 159, 172, 195, 203, 207, 230, 240, 259, 269, 285, 325, 340, 365, 390, 406, 413, 435, 465, 493, 522, 536, 547, 621, 651, 676, 679, 685, 713, 732, 737, 791, 807, 817, 847, 862, 917, 937, 994, 1020, 1031, 1052, 1105, 1108, 1131, 1182, 1188, 1189, 1204, 1210, 1228, 1241, 1312, 1319, 1350, 1397, 1446, 1470, 1476, 1484, 1502, 1504, 1515, 1518, 1639, 1691, 1694, 1839, 1903, 3081, 3114, 3171, 3181, 3185, 3195, 3223, 3233, 3242, 3250, 3336, 3828, 3937 | 36, 42, 81, 98, 108, 120, 130, 149, 158, 166, 187, 196, 197, 224, 231, 242, 262, 287, 320, 357, 389, 404, 415, 429, 467, 492, 537, 545, 600, 617, 672, 678, 684, 714, 732, 736, 792, 807, 823, 848, 861, 922, 937, 996, 1021, 1030, 1048, 1106, 1109, 1129, 1180, 1183, 1190, 1201, 1212, 1237, 1242, 1309, 1318, 1351, 1395, 1443, 1467, 1473, 1485, 1502, 1506, 1516, 1517, 1692, 1697, 1851, 1909, 3080, 3114, 3169, 3184, 3186, 3194, 3220, 3232, 3240, 3246, 3343 |
| Rotational constants (GHz)                                                                                                                                                                                                                                                                                                                                                                                                                                                                                             | Rotational constants (GHz)                                                                                                                                                                                                                                                                                                                                                                                                                                                                                                       | Rotational constants (GHz)                                                                                                                                                                                                                                                                                                                                                                                                                                                                                           | Rotational constants (GHz)                                                                                                                                                                                                                                                                                                                                                                                                                                             |
| 0.44326, 0.23032, 0.21853                                                                                                                                                                                                                                                                                                                                                                                                                                                                                              | 0.42059, 0.23269, 0.20669                                                                                                                                                                                                                                                                                                                                                                                                                                                                                                        | 0.41811, 0.23131, 0.20894                                                                                                                                                                                                                                                                                                                                                                                                                                                                                            | 0.52232, 0.23757, 0.22655                                                                                                                                                                                                                                                                                                                                                                                                                                              |

**Table S34.** Vibrational frequencies and rotational constants for the stationary points involved in the H30-abstraction pathway in gas phase calculated at the M06-2X/6-31+G(d,p) level of theory.

| MCR(H30-abs)<br>$C_1 - ^2A$                                                                                                                                                                                                                                                                                                                                                                                                                                                                                            | TS(H30-abs)<br>$C_1 - ^2A$                                                                                                                                                                                                                                                                                                                                                                                                                                                                                                       | MCP(H30-abs)<br>$C_1 - ^2A$                                                                                                                                                                                                                                                                                                                                                                                                                                                                                          | Rad(H30-abs)<br>$C_1 - ^2A$                                                                                                                                                                                                                                                                                                                                                                                                                                            |
|------------------------------------------------------------------------------------------------------------------------------------------------------------------------------------------------------------------------------------------------------------------------------------------------------------------------------------------------------------------------------------------------------------------------------------------------------------------------------------------------------------------------|----------------------------------------------------------------------------------------------------------------------------------------------------------------------------------------------------------------------------------------------------------------------------------------------------------------------------------------------------------------------------------------------------------------------------------------------------------------------------------------------------------------------------------|----------------------------------------------------------------------------------------------------------------------------------------------------------------------------------------------------------------------------------------------------------------------------------------------------------------------------------------------------------------------------------------------------------------------------------------------------------------------------------------------------------------------|------------------------------------------------------------------------------------------------------------------------------------------------------------------------------------------------------------------------------------------------------------------------------------------------------------------------------------------------------------------------------------------------------------------------------------------------------------------------|
| Vibrational frequencies ( $cm^{-1}$ )                                                                                                                                                                                                                                                                                                                                                                                                                                                                                  | Vibrational frequencies ( $cm^{-1}$ )                                                                                                                                                                                                                                                                                                                                                                                                                                                                                            | Vibrational frequencies ( $cm^{-1}$ )                                                                                                                                                                                                                                                                                                                                                                                                                                                                                | Vibrational frequencies ( $cm^{-1}$ )                                                                                                                                                                                                                                                                                                                                                                                                                                  |
| 18, 32, 42 ,57, 84, 89 ,108, 121, 129, 141, 152, 153, 161, 171, 186, 197, 200, 232, 238, 269, 283, 316, 336, 356, 379, 394, 409, 416, 431, 467, 495, 539, 549, 620, 668, 677 ,678, 704, 732, 733, 793, 807, 835, 845, 860, 920, 937, 995, 1026, 1030, 1051, 1088, 1106, 1126, 1139, 1181, 1186, 1189, 1201, 1208, 1212, 1243, 1312, 1328, 1356, 1398, 1447, 1469, 1483, 1487, 1492, 1497, 1500, 1502, 1517, 1518, 1692, 1698, 1853, 1909, 3084, 3088, 3124, 3172, 3174, 3197, 3201, 3219, 3222, 3232, 3241, 3246, 3682 | <b>1163i</b> , 20, 38, 42, 77, 83, 110, 117, 128, 145, 151, 159, 159, 187, 192, 198, 227, 238, 262, 276, 293, 319, 341, 357, 391, 402, 414, 431, 468, 493, 539, 547, 619, 668, 677, 678, 707, 732, 733, 792, 795, 808, 821, 843, 860, 921, 922, 937, 997, 1025, 1031, 1050, 1104, 1106, 1127, 1152, 1181, 1187, 1190, 1201, 1210, 1228, 1242, 1311, 1325, 1352, 1358, 1397, 1446, 1458, 1469, 1483, 1498, 1500, 1502, 1516, 1517, 1692, 1697, 1851, 1908, 3082, 3101, 3121, 3172, 3193, 3198, 3214, 3222, 3232, 3241, 3246, 3730 | 17, 34, 38, 56, 83, 95, 115, 119, 126, 143, 154, 159, 168, 184, 188, 196, 205, 228, 240, 258, 262, 274, 290, 322, 338, 358, 391, 406, 415, 431, 466, 496, 538, 545, 617, 634, 674, 678, 681, 712, 732, 734, 792, 807, 820, 846, 859, 921, 936, 997, 1022, 1031, 1049, 1104, 1107, 1127, 1181, 1182, 1190, 1201, 1212, 1223, 1242, 1310, 1319, 1351, 1397, 1442, 1466, 1471, 1485, 1504, 1505, 1517, 1518, 1630, 1693, 1697, 1852, 1909, 3082, 3113, 3172, 3185, 3186, 3197, 3222, 3232, 3241, 3246, 3346, 3849, 3959 | 36, 42, 81, 98, 108, 121, 130, 149, 158, 167, 187, 196, 198, 224, 231, 242, 262, 287, 320, 357, 389, 404, 415, 429, 467, 492, 537, 545, 601, 617, 672, 678, 685, 714, 732, 736, 793, 807, 823, 848, 861, 922, 937, 996, 1021, 1030, 1048, 1106, 1109, 1129, 1180, 1183, 1190, 1201, 1212, 1237, 1242, 1309, 1318, 1351, 1395, 1443, 1468, 1473, 1485, 1502, 1506, 1516, 1517, 1692, 1697, 1852, 1909, 3080, 3114, 3169, 3184, 3186, 3194, 3220, 3232, 3240, 3246, 3343 |
| Rotational constants (GHz)                                                                                                                                                                                                                                                                                                                                                                                                                                                                                             | Rotational constants (GHz)                                                                                                                                                                                                                                                                                                                                                                                                                                                                                                       | Rotational constants (GHz)                                                                                                                                                                                                                                                                                                                                                                                                                                                                                           | Rotational constants (GHz)                                                                                                                                                                                                                                                                                                                                                                                                                                             |
| 0.40853, 0.22736, 0.21161                                                                                                                                                                                                                                                                                                                                                                                                                                                                                              | 0.41960, 0.21385, 0.19725                                                                                                                                                                                                                                                                                                                                                                                                                                                                                                        | 0.41081, 0.22172, 0.20672                                                                                                                                                                                                                                                                                                                                                                                                                                                                                            | 0.52231, 0.23759, 0.22657                                                                                                                                                                                                                                                                                                                                                                                                                                              |

**Table S35.** Vibrational frequencies and rotational constants for the stationary points involved in the H31-abstraction pathway in gas phase calculated at the M06-2X/6-31+G(d,p) level of theory.

| MCR(H31-abs)<br>$C_1 - ^2A$                                                                                                                                                                                                                                                                                                                                                                                                                                                                                            | TS(H31-abs)<br>$C_1 - ^2A$                                                                                                                                                                                                                                                                                                                                                                                                                                                                                                 | MCP(H31-abs)<br>$C_1 - ^2A$                                                                                                                                                                                                                                                                                                                                                                                                                                                                                           | Rad(H31-abs)<br>$C_1 - ^2A$                                                                                                                                                                                                                                                                                                                                                                                                                                            |
|------------------------------------------------------------------------------------------------------------------------------------------------------------------------------------------------------------------------------------------------------------------------------------------------------------------------------------------------------------------------------------------------------------------------------------------------------------------------------------------------------------------------|----------------------------------------------------------------------------------------------------------------------------------------------------------------------------------------------------------------------------------------------------------------------------------------------------------------------------------------------------------------------------------------------------------------------------------------------------------------------------------------------------------------------------|-----------------------------------------------------------------------------------------------------------------------------------------------------------------------------------------------------------------------------------------------------------------------------------------------------------------------------------------------------------------------------------------------------------------------------------------------------------------------------------------------------------------------|------------------------------------------------------------------------------------------------------------------------------------------------------------------------------------------------------------------------------------------------------------------------------------------------------------------------------------------------------------------------------------------------------------------------------------------------------------------------|
| Vibrational frequencies ( $cm^{-1}$ )                                                                                                                                                                                                                                                                                                                                                                                                                                                                                  | Vibrational frequencies ( $cm^{-1}$ )                                                                                                                                                                                                                                                                                                                                                                                                                                                                                      | Vibrational frequencies ( $cm^{-1}$ )                                                                                                                                                                                                                                                                                                                                                                                                                                                                                 | Vibrational frequencies ( $cm^{-1}$ )                                                                                                                                                                                                                                                                                                                                                                                                                                  |
| 30 ,36, 48, 77, 82, 93, 113, 120, 127, 137, 144, 156, 160, 163, 187, 195, 197, 220, 231, 240, 262, 281, 319, 356, 386, 402, 414, 428, 466, 482, 537, 540, 545, 618, 659, 677, 684, 713, 732, 736, 792, 806, 835, 853, 871, 920, 940, 995, 1023, 1030, 1049, 1091, 1106, 1127, 1141, 1180, 1190, 1194, 1201, 1210, 1218, 1242, 1308, 1316, 1339, 1396, 1445, 1472, 1483, 1487, 1501, 1505, 1509, 1517, 1518, 1520, 1693, 1698, 1852, 1910, 3080, 3083, 3122, 3168, 3172, 3195, 3198, 3210, 3221, 3232, 3241, 3246, 3802 | <b>950i</b> , 33, 37, 49, 80, 100, 109, 125, 136, 139, 154, 160, 175, 185, 195, 198, 234, 241, 267, 282, 295, 302, 320, 357, 390, 404, 414, 428, 467, 493, 538, 545, 618, 669, 677, 680, 712, 732, 734, 791, 803, 807, 812, 847, 859, 920, 941, 953, 996, 1023, 1030, 1049, 1105, 1107, 1148, 1180, 1190, 1197, 1202, 1211, 1217, 1242, 1310, 1319, 1349, 1396, 1410, 1444, 1454, 1480, 1484, 1498, 1502, 1506, 1517, 1518, 1693, 1697, 1852, 1910, 3082, 3112, 3114, 3171, 3186, 3195, 3217, 3220, 3231, 3239, 3244, 3753 | 38, 39, 65, 82, 95, 108, 117, 126, 135, 143, 146, 162, 168, 187, 196, 203, 232, 239, 248, 265, 292, 298, 318, 329, 362, 391, 407, 414, 431, 468, 490, 500, 541, 550, 621, 668, 676, 677, 679, 704, 733, 734, 792, 807, 819, 846, 863, 920, 943, 996, 1024, 1031, 1049, 1105, 1107, 1129, 1181, 1188, 1189, 1202, 1210, 1238, 1243, 1312, 1332, 1357, 1397, 1449, 1472, 1484, 1486, 1497, 1503, 1517, 1518, 1615, 1693, 1697, 1843, 1906, 3085, 3126, 3173, 3178, 3200, 3203, 3222, 3233, 3242, 3246, 3334, 3818, 3939 | 36, 42, 81, 98 ,108, 121, 130, 149, 158, 167, 187, 196, 198, 224, 231, 242, 262, 287, 320, 357, 389, 404, 415, 429, 467, 493, 537, 545, 601, 617, 672, 678, 684, 714, 732, 736, 793, 807, 823, 848, 861, 922, 937, 996, 1021, 1030, 1048, 1106, 1109, 1129, 1180, 1183, 1190, 1201, 1212, 1237, 1242, 1309, 1318, 1351, 1395, 1443, 1468, 1473, 1485, 1502, 1506, 1516, 1517, 1692, 1697, 1852, 1909, 3080, 3114, 3169, 3184, 3186, 3194, 3221, 3232, 3240, 3246, 3343 |
| Rotational constants (GHz)                                                                                                                                                                                                                                                                                                                                                                                                                                                                                             | Rotational constants (GHz)                                                                                                                                                                                                                                                                                                                                                                                                                                                                                                 | Rotational constants (GHz)                                                                                                                                                                                                                                                                                                                                                                                                                                                                                            | Rotational constants (GHz)                                                                                                                                                                                                                                                                                                                                                                                                                                             |
| 0.45604, 0.21412 ,0.20015                                                                                                                                                                                                                                                                                                                                                                                                                                                                                              | 0.44182, 0.22019, 0.19917                                                                                                                                                                                                                                                                                                                                                                                                                                                                                                  | 0.40288, 0.23134, 0.20280                                                                                                                                                                                                                                                                                                                                                                                                                                                                                             | 0.52229, 0.23760, 0.22659                                                                                                                                                                                                                                                                                                                                                                                                                                              |

**Table S36.** Vibrational frequencies and rotational constants for the stationary points involved in the C1-addition pathway in gas phase calculated at the M06-2X/6-31+G(d,p) level of theory.

| MCR(C1-add)<br>$C_1 - ^2A$                                                                                                                                                                                                                                                                                                                                                                                                                                                                                            | TS(C1-add)<br>$C_1 - ^2A$                                                                                                                                                                                                                                                                                                                                                                                                                                                                                                      | Adduct(C1-add)<br>$C_1 - ^2A$                                                                                                                                                                                                                                                                                                                                                                                                                                                                                           |
|-----------------------------------------------------------------------------------------------------------------------------------------------------------------------------------------------------------------------------------------------------------------------------------------------------------------------------------------------------------------------------------------------------------------------------------------------------------------------------------------------------------------------|--------------------------------------------------------------------------------------------------------------------------------------------------------------------------------------------------------------------------------------------------------------------------------------------------------------------------------------------------------------------------------------------------------------------------------------------------------------------------------------------------------------------------------|-------------------------------------------------------------------------------------------------------------------------------------------------------------------------------------------------------------------------------------------------------------------------------------------------------------------------------------------------------------------------------------------------------------------------------------------------------------------------------------------------------------------------|
| Vibrational frequencies ( $\text{cm}^{-1}$ )                                                                                                                                                                                                                                                                                                                                                                                                                                                                          | Vibrational frequencies ( $\text{cm}^{-1}$ )                                                                                                                                                                                                                                                                                                                                                                                                                                                                                   | Vibrational frequencies ( $\text{cm}^{-1}$ )                                                                                                                                                                                                                                                                                                                                                                                                                                                                            |
| 16, 25, 26, 37, 84, 90, 95, 112, 127, 136, 145, 149, 157, 165, 169, 187, 196, 202, 228, 239, 264, 283, 320, 356, 371, 390, 405, 416, 432, 470, 489, 539, 548, 619, 669, 677, 683, 708, 732, 735, 796, 809, 831, 845, 868, 921, 936, 994, 1023, 1024, 1046, 1092, 1106, 1127, 1143, 1182, 1186, 1189, 1200, 1209, 1214, 1240, 1310, 1324, 1356, 1396, 1446, 1469, 1481, 1485, 1499, 1500, 1504, 1506, 1513, 1513, 1686, 1695, 1852, 1908, 3077, 3082, 3119, 3161, 3170, 3192, 3196, 3210, 3230, 3237, 3244, 3251, 3772 | <b>558i</b> , 14, 35, 63, 84, 86, 95, 108, 114, 139, 149, 160, 164, 170, 186, 188, 196, 211, 230, 241, 265, 283, 321, 355, 387, 399, 411, 431, 449, 489, 539, 544, 617, 644, 670, 681, 705, 727, 743, 786, 794, 831, 839, 846, 869, 917, 936, 978, 997, 1028, 1040, 1092, 1099, 1127, 1143, 1171, 1186, 1189, 1197, 1208, 1213, 1231, 1306, 1324, 1356, 1384, 1444, 1469, 1480, 1483, 1486, 1498, 1500, 1504, 1506, 1506, 1637, 1668, 1851, 1907, 3078, 3082, 3121, 3162, 3171, 3193, 3196, 3209, 3235, 3243, 3247, 3257, 3796 | 23, 34, 59, 83, 93, 96, 110, 132, 144, 149, 157, 187, 190, 193, 201, 210, 239, 260, 284, 311, 332, 340, 371, 383, 401, 427, 434, 462, 490, 525, 538, 608, 619, 663, 670, 699, 710, 736, 758, 789, 826, 835, 865, 868, 908, 930, 998, 1017, 1063, 1092, 1093, 1125, 1143, 1150, 1178, 1186, 1191, 1210, 1214, 1219, 1231, 1292, 1323, 1345, 1353, 1385, 1414, 1440, 1461, 1472, 1480, 1485, 1498, 1499, 1506, 1510, 1565, 1691, 1830, 1890, 3017, 3078, 3083, 3120, 3161, 3172, 3193, 3195, 3211, 3223, 3227, 3240, 3859 |
| Rotational constants (GHz)                                                                                                                                                                                                                                                                                                                                                                                                                                                                                            | Rotational constants (GHz)                                                                                                                                                                                                                                                                                                                                                                                                                                                                                                     | Rotational constants (GHz)                                                                                                                                                                                                                                                                                                                                                                                                                                                                                              |
| 0.50575, 0.18506, 0.17921                                                                                                                                                                                                                                                                                                                                                                                                                                                                                             | 0.44276, 0.23058, 0.21869                                                                                                                                                                                                                                                                                                                                                                                                                                                                                                      | 0.48621, 0.19392, 0.18580                                                                                                                                                                                                                                                                                                                                                                                                                                                                                               |

**Table S37.** Vibrational frequencies and rotational constants for the stationary points involved in the C2-addition pathway in gas phase calculated at the M06-2X/6-31+G(d,p) level of theory.

| MCR(C2-add)<br>$C_1 - ^2A$                                                                                                                                                                                                                                                                                                                                                                                                                                                                                             | TS(C2-add)<br>$C_1 - ^2A$                                                                                                                                                                                                                                                                                                                                                                                                                                                                                                         | Adduct(C2-add)<br>$C_1 - ^2A$                                                                                                                                                                                                                                                                                                                                                                                                                                                                                              |
|------------------------------------------------------------------------------------------------------------------------------------------------------------------------------------------------------------------------------------------------------------------------------------------------------------------------------------------------------------------------------------------------------------------------------------------------------------------------------------------------------------------------|-----------------------------------------------------------------------------------------------------------------------------------------------------------------------------------------------------------------------------------------------------------------------------------------------------------------------------------------------------------------------------------------------------------------------------------------------------------------------------------------------------------------------------------|----------------------------------------------------------------------------------------------------------------------------------------------------------------------------------------------------------------------------------------------------------------------------------------------------------------------------------------------------------------------------------------------------------------------------------------------------------------------------------------------------------------------------|
| Vibrational frequencies ( $\text{cm}^{-1}$ )                                                                                                                                                                                                                                                                                                                                                                                                                                                                           | Vibrational frequencies ( $\text{cm}^{-1}$ )                                                                                                                                                                                                                                                                                                                                                                                                                                                                                      | Vibrational frequencies ( $\text{cm}^{-1}$ )                                                                                                                                                                                                                                                                                                                                                                                                                                                                               |
| 14, 30, 39, 79, 86, 92, 108, 112, 134, 139, 140, 154, 168, 172, 187, 194, 202, 229, 239, 266, 289, 319, 356, 390, 399, 408, 420, 438, 464, 478, 499, 539, 549, 620, 673, 675, 680, 704, 731, 732, 790, 804, 824, 842, 866, 918, 936, 994, 1026, 1028, 1050, 1080, 1105, 1126, 1137, 1181, 1185, 1191, 1201, 1210, 1216, 1242, 1311, 1328, 1356, 1399, 1448, 1468, 1482, 1486, 1497, 1498, 1503, 1505, 1515, 1515, 1690, 1693, 1851, 1907, 3081, 3087, 3122, 3166, 3181, 3195, 3201, 3212, 3225, 3235, 3243, 3248, 3679 | <b>604i</b> , 24, 61, 72, 88, 110, 118, 130, 135, 145, 157, 168, 169, 184, 191, 196, 207, 234, 240, 269, 287, 317, 355, 385, 402, 404, 417, 436, 465, 488, 537, 547, 618, 645, 668, 679, 699, 726, 741, 787, 807, 827, 839, 865, 899, 933, 940, 989, 1012, 1027, 1044, 1078, 1095, 1124, 1134, 1181, 1187, 1189, 1192, 1210, 1217, 1230, 1304, 1329, 1357, 1392, 1448, 1468, 1482, 1482, 1486, 1497, 1502, 1504, 1505, 1506, 1639, 1662, 1851, 1906, 3083, 3086, 3129, 3169, 3177, 3201, 3208, 3209, 3228, 3240, 3247, 3257, 3740 | 29, 62, 75, 91, 107, 115, 137, 142, 153, 165, 170, 182, 185, 194, 198, 206, 237, 262, 288, 309, 322, 358, 395, 404, 417, 426, 437, 477, 489, 531, 537, 595, 621, 668, 671, 687, 703, 743, 763, 797, 823, 836, 864, 874, 918, 939, 1003, 1029, 1033, 1064, 1079, 1116, 1128, 1134, 1184, 1188, 1192, 1211, 1218, 1223, 1250, 1286, 1325, 1351, 1372, 1408, 1423, 1443, 1457, 1469, 1483, 1486, 1497, 1504, 1505, 1506, 1577, 1628, 1841, 1896, 3062, 3084, 3086, 3131, 3171, 3175, 3203, 3203, 3209, 3219, 3234, 3249, 3812 |
| Rotational constants (GHz)                                                                                                                                                                                                                                                                                                                                                                                                                                                                                             | Rotational constants (GHz)                                                                                                                                                                                                                                                                                                                                                                                                                                                                                                        | Rotational constants (GHz)                                                                                                                                                                                                                                                                                                                                                                                                                                                                                                 |
| 0.44331, 0.23031, 0.21847                                                                                                                                                                                                                                                                                                                                                                                                                                                                                              | 0.44117, 0.23535, 0.22069                                                                                                                                                                                                                                                                                                                                                                                                                                                                                                         | 0.43099, 0.24215, 0.22736                                                                                                                                                                                                                                                                                                                                                                                                                                                                                                  |

**Table S38.** Vibrational frequencies and rotational constants for the stationary points involved in the C3-addition pathway in gas phase calculated at the M06-2X/6-31+G(d,p) level of theory.

| MCR(C3-add)<br>$C_1 - ^2A$                                                                                                                                                                                                                                                                                                                                                                                                                                                                                           | TS(C3-add)<br>$C_1 - ^2A$                                                                                                                                                                                                                                                                                                                                                                                                                                                                                                        | Adduct(C3-add)<br>$C_1 - ^2A$                                                                                                                                                                                                                                                                                                                                                                                                                                                                                            |
|----------------------------------------------------------------------------------------------------------------------------------------------------------------------------------------------------------------------------------------------------------------------------------------------------------------------------------------------------------------------------------------------------------------------------------------------------------------------------------------------------------------------|----------------------------------------------------------------------------------------------------------------------------------------------------------------------------------------------------------------------------------------------------------------------------------------------------------------------------------------------------------------------------------------------------------------------------------------------------------------------------------------------------------------------------------|--------------------------------------------------------------------------------------------------------------------------------------------------------------------------------------------------------------------------------------------------------------------------------------------------------------------------------------------------------------------------------------------------------------------------------------------------------------------------------------------------------------------------|
| Vibrational frequencies ( $\text{cm}^{-1}$ )                                                                                                                                                                                                                                                                                                                                                                                                                                                                         | Vibrational frequencies ( $\text{cm}^{-1}$ )                                                                                                                                                                                                                                                                                                                                                                                                                                                                                     | Vibrational frequencies ( $\text{cm}^{-1}$ )                                                                                                                                                                                                                                                                                                                                                                                                                                                                             |
| 21, 33, 36, 52, 60, 83, 88, 93, 110, 121, 137, 145, 154, 166, 176, 192, 196, 207, 229, 243, 264, 284, 311, 322, 356, 390, 404, 419, 432, 470, 490, 539, 549, 621, 669, 678, 682, 707, 732, 734, 794, 809, 832, 844, 867, 921, 937, 997, 1026, 1031, 1049, 1094, 1107, 1130, 1144, 1179, 1187, 1191, 1201, 1209, 1214, 1243, 1310, 1324, 1357, 1393, 1452, 1469, 1482, 1485, 1498, 1500, 1505, 1508, 1514, 1517, 1687, 1695, 1854, 1913, 3077, 3083, 3121, 3160, 3171, 3194, 3196, 3211, 3221, 3231, 3240, 3244, 3767 | <b>541i</b> , 26, 37, 70, 86, 96, 105, 114, 135, 142, 145, 162, 167, 178, 184, 191, 198, 201, 229, 243, 267, 286, 326, 355, 389, 393, 408, 433, 454, 488, 536, 546, 618, 652, 671, 680, 701, 718, 742, 770, 796, 813, 830, 844, 867, 906, 936, 986, 1017, 1022, 1043, 1091, 1107, 1131, 1143, 1171, 1187, 1190, 1193, 1210, 1214, 1228, 1309, 1322, 1357, 1375, 1446, 1469, 1479, 1482, 1485, 1500, 1501, 1505, 1507, 1510, 1636, 1669, 1855, 1919, 3078, 3083, 3122, 3161, 3172, 3194, 3195, 3210, 3224, 3235, 3244, 3248, 3795 | 32, 44, 69, 77, 91, 108, 115, 134, 143, 161, 178, 182, 188, 202, 207, 233, 253, 259, 278, 286, 298, 340, 356, 392, 403, 419, 435, 482, 499, 519, 544, 602, 620, 670, 677, 686, 699, 745, 767, 788, 830, 841, 854, 868, 928, 950, 976, 1001, 1004, 1064, 1078, 1089, 1109, 1134, 1141, 1154, 1180, 1185, 1191, 1208, 1213, 1272, 1319, 1329, 1344, 1357, 1404, 1434, 1439, 1469, 1479, 1483, 1499, 1500, 1505, 1506, 1576, 1644, 1847, 1910, 3077, 3083, 3121, 3160, 3172, 3195, 3197, 3210, 3218, 3226, 3234, 3247, 3853 |
| Rotational constants (GHz)                                                                                                                                                                                                                                                                                                                                                                                                                                                                                           | Rotational constants (GHz)                                                                                                                                                                                                                                                                                                                                                                                                                                                                                                       | Rotational constants (GHz)                                                                                                                                                                                                                                                                                                                                                                                                                                                                                               |
| 0.47058, 0.20986, 0.20514                                                                                                                                                                                                                                                                                                                                                                                                                                                                                            | 0.46504, 0.21943, 0.21814                                                                                                                                                                                                                                                                                                                                                                                                                                                                                                        | 0.44751, 0.24109, 0.23484                                                                                                                                                                                                                                                                                                                                                                                                                                                                                                |

**Table S36.** Vibrational frequencies and rotational constants for the stationary points involved in the C4-addition pathway in gas phase calculated at the M06-2X/6-31+G(d,p) level of theory.

| MCR(C4-add)<br>$C_1 - ^2A$                                                                                                                                                                                                                                                                                                                                                                                                                                                                                           | TS(C4-add)<br>$C_1 - ^2A$                                                                                                                                                                                                                                                                                                                                                                                                                                                                                                        | Adduct(C4-add)<br>$C_1 - ^2A$                                                                                                                                                                                                                                                                                                                                                                                                                                                                                            |
|----------------------------------------------------------------------------------------------------------------------------------------------------------------------------------------------------------------------------------------------------------------------------------------------------------------------------------------------------------------------------------------------------------------------------------------------------------------------------------------------------------------------|----------------------------------------------------------------------------------------------------------------------------------------------------------------------------------------------------------------------------------------------------------------------------------------------------------------------------------------------------------------------------------------------------------------------------------------------------------------------------------------------------------------------------------|--------------------------------------------------------------------------------------------------------------------------------------------------------------------------------------------------------------------------------------------------------------------------------------------------------------------------------------------------------------------------------------------------------------------------------------------------------------------------------------------------------------------------|
| Vibrational frequencies ( $\text{cm}^{-1}$ )                                                                                                                                                                                                                                                                                                                                                                                                                                                                         | Vibrational frequencies ( $\text{cm}^{-1}$ )                                                                                                                                                                                                                                                                                                                                                                                                                                                                                     | Vibrational frequencies ( $\text{cm}^{-1}$ )                                                                                                                                                                                                                                                                                                                                                                                                                                                                             |
| 21, 36, 41, 59, 65, 83, 88, 93, 110, 121, 137, 145, 154, 166, 176, 192, 196, 207, 229, 243, 264, 283, 308, 322, 356, 390, 404, 419, 432, 470, 490, 539, 549, 621, 669, 678, 682, 707, 733, 734, 794, 809, 832, 844, 867, 921, 937, 997, 1026, 1031, 1049, 1094, 1107, 1130, 1144, 1179, 1187, 1191, 1201, 1209, 1214, 1243, 1310, 1324, 1357, 1393, 1452, 1469, 1482, 1485, 1498, 1500, 1505, 1508, 1514, 1517, 1687, 1695, 1854, 1913, 3077, 3083, 3121, 3160, 3171, 3194, 3196, 3211, 3221, 3231, 3240, 3244, 3768 | <b>541i</b> , 26, 37, 70, 86, 96, 104, 114, 135, 142, 145, 162, 166, 176, 183, 191, 198, 201, 229, 243, 267, 286, 326, 355, 389, 393, 408, 433, 454, 488, 536, 546, 618, 652, 671, 680, 701, 718, 742, 770, 796, 813, 830, 844, 867, 906, 936, 986, 1017, 1022, 1043, 1091, 1107, 1131, 1143, 1171, 1187, 1190, 1193, 1210, 1214, 1228, 1309, 1322, 1357, 1375, 1446, 1469, 1479, 1482, 1485, 1500, 1501, 1505, 1507, 1510, 1636, 1669, 1855, 1919, 3078, 3083, 3122, 3161, 3172, 3194, 3195, 3210, 3224, 3235, 3244, 3248, 3795 | 32, 44, 69, 77, 91, 108, 115, 134, 143, 161, 178, 182, 188, 202, 207, 233, 253, 259, 278, 286, 298, 340, 356, 392, 403, 419, 435, 482, 499, 519, 544, 602, 620, 670, 677, 686, 699, 745, 767, 788, 830, 841, 854, 868, 928, 950, 976, 1001, 1004, 1064, 1078, 1089, 1109, 1134, 1141, 1154, 1180, 1185, 1191, 1208, 1213, 1272, 1319, 1329, 1344, 1357, 1404, 1434, 1439, 1469, 1479, 1483, 1499, 1500, 1505, 1506, 1576, 1644, 1847, 1910, 3077, 3083, 3121, 3160, 3172, 3195, 3197, 3210, 3218, 3226, 3234, 3247, 3853 |
| Rotational constants (GHz)                                                                                                                                                                                                                                                                                                                                                                                                                                                                                           | Rotational constants (GHz)                                                                                                                                                                                                                                                                                                                                                                                                                                                                                                       | Rotational constants (GHz)                                                                                                                                                                                                                                                                                                                                                                                                                                                                                               |
| 0.47052, 0.20987, 0.20515                                                                                                                                                                                                                                                                                                                                                                                                                                                                                            | 0.46504, 0.21945, 0.21816                                                                                                                                                                                                                                                                                                                                                                                                                                                                                                        | 0.44751, 0.24109, 0.23484                                                                                                                                                                                                                                                                                                                                                                                                                                                                                                |

**Table S37.** Vibrational frequencies and rotational constants for the stationary points involved in the C5-addition pathway in gas phase calculated at the M06-2X/6-31+G(d,p) level of theory.

| MCR(C5-add)<br>C <sub>1</sub> - <sup>2</sup> A                                                                                                                                                                                                                                                                                                                                                                                                                                                                         | TS(C5-add)<br>C <sub>1</sub> - <sup>2</sup> A                                                                                                                                                                                                                                                                                                                                                                                                                                                                                     | Adduct(C5-add)<br>C <sub>1</sub> - <sup>2</sup> A                                                                                                                                                                                                                                                                                                                                                                                                                                                                          |
|------------------------------------------------------------------------------------------------------------------------------------------------------------------------------------------------------------------------------------------------------------------------------------------------------------------------------------------------------------------------------------------------------------------------------------------------------------------------------------------------------------------------|-----------------------------------------------------------------------------------------------------------------------------------------------------------------------------------------------------------------------------------------------------------------------------------------------------------------------------------------------------------------------------------------------------------------------------------------------------------------------------------------------------------------------------------|----------------------------------------------------------------------------------------------------------------------------------------------------------------------------------------------------------------------------------------------------------------------------------------------------------------------------------------------------------------------------------------------------------------------------------------------------------------------------------------------------------------------------|
| Vibrational frequencies (cm <sup>-1</sup> )                                                                                                                                                                                                                                                                                                                                                                                                                                                                            | Vibrational frequencies (cm <sup>-1</sup> )                                                                                                                                                                                                                                                                                                                                                                                                                                                                                       | Vibrational frequencies (cm <sup>-1</sup> )                                                                                                                                                                                                                                                                                                                                                                                                                                                                                |
| 14, 30, 39, 78, 85, 92, 108, 112, 133, 138, 140, 153, 167, 172, 187, 194, 202, 229, 239, 266, 289, 319, 356, 390, 399, 408, 420, 438, 464, 478, 499, 539, 549, 620, 673, 675, 680, 704, 731, 732, 790, 804, 824, 842, 866, 918, 936, 994, 1026, 1028, 1050, 1080, 1105, 1126, 1137, 1181, 1185, 1190, 1201, 1210, 1216, 1242, 1311, 1328, 1356, 1399, 1448, 1467, 1482, 1486, 1497, 1498, 1503, 1505, 1515, 1515, 1690, 1693, 1851, 1907, 3081, 3087, 3122, 3166, 3181, 3195, 3200, 3212, 3225, 3235, 3243, 3248, 3679 | <b>604i</b> , 24, 61, 72, 88, 110, 118, 130, 135, 145, 157, 168, 169, 184, 191, 196, 207, 234, 240, 269, 287, 317, 355, 385, 402, 404, 417, 436, 465, 488, 537, 547, 618, 645, 668, 679, 699, 726, 741, 787, 807, 827, 839, 865, 899, 933, 940, 989, 1012, 1027, 1044, 1078, 1095, 1124, 1134, 1181, 1187, 1189, 1192, 1210, 1217, 1230, 1304, 1329, 1357, 1392, 1448, 1468, 1482, 1482, 1486, 1497, 1502, 1504, 1505, 1506, 1639, 1662, 1851, 1906, 3083, 3086, 3129, 3169, 3177, 3201, 3208, 3209, 3228, 3240, 3247, 3257, 3740 | 29, 62, 75, 91, 107, 115, 137, 142, 153, 165, 170, 182, 186, 194, 199, 206, 237, 262, 288, 309, 322, 358, 395, 404, 417, 426, 437, 477, 489, 531, 537, 595, 621, 668, 671, 687, 703, 743, 763, 797, 823, 836, 864, 874, 918, 939, 1003, 1029, 1033, 1065, 1079, 1116, 1128, 1134, 1184, 1188, 1192, 1211, 1218, 1223, 1250, 1286, 1325, 1351, 1371, 1408, 1423, 1443, 1457, 1469, 1483, 1486, 1497, 1504, 1505, 1506, 1577, 1628, 1841, 1896, 3062, 3084, 3086, 3131, 3171, 3175, 3203, 3203, 3209, 3219, 3234, 3249, 3812 |
| Rotational constants (GHz)                                                                                                                                                                                                                                                                                                                                                                                                                                                                                             | Rotational constants (GHz)                                                                                                                                                                                                                                                                                                                                                                                                                                                                                                        | Rotational constants (GHz)                                                                                                                                                                                                                                                                                                                                                                                                                                                                                                 |
| 0.44328, 0.23031, 0.21851                                                                                                                                                                                                                                                                                                                                                                                                                                                                                              | 0.44117, 0.23535, 0.22068                                                                                                                                                                                                                                                                                                                                                                                                                                                                                                         | 0.43098, 0.24215, 0.22735                                                                                                                                                                                                                                                                                                                                                                                                                                                                                                  |



**Table S38.** Vibrational frequencies and rotational constants for the stationary points involved in the C6-addition pathway in gas phase calculated at the M06-2X/6-31+G(d,p) level of theory.

| MCR(C6-add)<br>C <sub>1</sub> - <sup>2</sup> A                                                                                                                                                                                                                                                                                                                                                                                                                                                                         | TS(C6-add)<br>C <sub>1</sub> - <sup>2</sup> A                                                                                                                                                                                                                                                                                                                                                                                                                                                                                  | Adduct(C6-add)<br>C <sub>1</sub> - <sup>2</sup> A                                                                                                                                                                                                                                                                                                                                                                                                                                                                      |
|------------------------------------------------------------------------------------------------------------------------------------------------------------------------------------------------------------------------------------------------------------------------------------------------------------------------------------------------------------------------------------------------------------------------------------------------------------------------------------------------------------------------|--------------------------------------------------------------------------------------------------------------------------------------------------------------------------------------------------------------------------------------------------------------------------------------------------------------------------------------------------------------------------------------------------------------------------------------------------------------------------------------------------------------------------------|------------------------------------------------------------------------------------------------------------------------------------------------------------------------------------------------------------------------------------------------------------------------------------------------------------------------------------------------------------------------------------------------------------------------------------------------------------------------------------------------------------------------|
| Vibrational frequencies (cm <sup>-1</sup> )                                                                                                                                                                                                                                                                                                                                                                                                                                                                            | Vibrational frequencies (cm <sup>-1</sup> )                                                                                                                                                                                                                                                                                                                                                                                                                                                                                    | Vibrational frequencies (cm <sup>-1</sup> )                                                                                                                                                                                                                                                                                                                                                                                                                                                                            |
| 27, 37, 40, 80, 83, 93, 109, 113, 127, 131, 139, 155, 165, 171, 187, 192, 197, 227, 239, 263, 280, 319, 357, 382, 392, 406, 415, 429, 436, 464, 501, 538, 546, 618, 674, 675, 680, 708, 731, 732, 790, 804, 819, 845, 866, 917, 935, 993, 1024, 1027, 1049, 1088, 1105, 1127, 1146, 1181, 1187, 1191, 1201, 1210, 1215, 1241, 1310, 1323, 1353, 1399, 1445, 1468, 1481, 1484, 1499, 1500, 1505, 1506, 1514, 1515, 1689, 1693, 1850, 1906, 3078, 3085, 3118, 3163, 3178, 3190, 3195, 3214, 3224, 3235, 3242, 3249, 3704 | <b>578i</b> , 12, 30, 66, 86, 92, 95, 109, 116, 138, 145, 158, 164, 176, 188, 195, 212, 230, 240, 257, 267, 286, 323, 357, 393, 399, 409, 432, 446, 488, 536, 546, 617, 644, 671, 677, 703, 726, 744, 784, 818, 829, 840, 851, 868, 915, 938, 982, 995, 1027, 1039, 1090, 1099, 1125, 1142, 1171, 1186, 1189, 1197, 1209, 1214, 1232, 1306, 1326, 1355, 1382, 1445, 1469, 1482, 1485, 1488, 1497, 1499, 1504, 1505, 1505, 1636, 1666, 1851, 1907, 3081, 3083, 3125, 3166, 3171, 3197, 3198, 3212, 3234, 3245, 3249, 3258, 3770 | 5, 27, 64, 78, 88, 98, 112, 126, 143, 148, 161, 164, 185, 193, 196, 211, 238, 264, 286, 311, 330, 343, 384, 386, 401, 431, 435, 467, 488, 520, 534, 610, 624, 666, 670, 693, 711, 739, 757, 793, 824, 833, 864, 872, 907, 931, 998, 1018, 1061, 1089, 1092, 1125, 1142, 1151, 1181, 1185, 1190, 1209, 1213, 1221, 1231, 1292, 1325, 1350, 1355, 1387, 1415, 1441, 1462, 1471, 1481, 1485, 1498, 1499, 1502, 1504, 1564, 1691, 1831, 1890, 3028, 3080, 3083, 3124, 3164, 3172, 3196, 3197, 3210, 3221, 3231, 3237, 3853 |
| Rotational constants (GHz)                                                                                                                                                                                                                                                                                                                                                                                                                                                                                             | Rotational constants (GHz)                                                                                                                                                                                                                                                                                                                                                                                                                                                                                                     | Rotational constants (GHz)                                                                                                                                                                                                                                                                                                                                                                                                                                                                                             |
| 0.45433, 0.22486, 0.22099                                                                                                                                                                                                                                                                                                                                                                                                                                                                                              | 0.42736, 0.22446, 0.21559                                                                                                                                                                                                                                                                                                                                                                                                                                                                                                      | 0.44261, 0.20634, 0.20249                                                                                                                                                                                                                                                                                                                                                                                                                                                                                              |

**Table S39.** Vibrational frequencies and rotational constants for the stationary points involved in the C7-addition pathway in gas phase calculated at the M06-2X/6-31+G(d,p) level of theory.

| MCR(C7-add)<br>$C_1 - ^2A$                                                                                                                                                                                                                                                                                                                                                                                                                                                                                              | TS(C7-add)<br>$C_1 - ^2A$                                                                                                                                                                                                                                                                                                                                                                                                                                                                                                        | Adduct(C7-add)<br>$C_1 - ^2A$                                                                                                                                                                                                                                                                                                                                                                                                                                                                                            |
|-------------------------------------------------------------------------------------------------------------------------------------------------------------------------------------------------------------------------------------------------------------------------------------------------------------------------------------------------------------------------------------------------------------------------------------------------------------------------------------------------------------------------|----------------------------------------------------------------------------------------------------------------------------------------------------------------------------------------------------------------------------------------------------------------------------------------------------------------------------------------------------------------------------------------------------------------------------------------------------------------------------------------------------------------------------------|--------------------------------------------------------------------------------------------------------------------------------------------------------------------------------------------------------------------------------------------------------------------------------------------------------------------------------------------------------------------------------------------------------------------------------------------------------------------------------------------------------------------------|
| Vibrational frequencies ( $\text{cm}^{-1}$ )                                                                                                                                                                                                                                                                                                                                                                                                                                                                            | Vibrational frequencies ( $\text{cm}^{-1}$ )                                                                                                                                                                                                                                                                                                                                                                                                                                                                                     | Vibrational frequencies ( $\text{cm}^{-1}$ )                                                                                                                                                                                                                                                                                                                                                                                                                                                                             |
| 25, 39, 53, 84, 95, 103, 108, 116, 132, 142, 151, 153, 162, 166, 187, 195, 198, 241, 246, 282, 290, 324, 366, 388, 403, 414, 432, 465, 486, 493, 529, 541, 555, 620, 670, 676, 683, 714, 733, 735, 790, 807, 831, 854, 869, 921, 940, 996, 1020, 1031, 1049, 1092, 1107, 1127, 1142, 1181, 1186, 1189, 1202, 1210, 1214, 1242, 1311, 1319, 1355, 1398, 1446, 1480, 1482, 1485, 1499, 1501, 1505, 1508, 1517, 1519, 1694, 1698, 1835, 1905, 3076, 3079, 3121, 3160, 3166, 3192, 3194, 3210, 3222, 3232, 3240, 3245, 3665 | <b>629i</b> , 25, 35, 81, 85, 94, 108, 118, 130, 135, 149, 157, 164, 173, 195, 200, 228, 250, 270, 281, 291, 315, 343, 371, 391, 404, 422, 432, 474, 491, 544, 548, 607, 620, 668, 677, 699, 719, 731, 780, 805, 831, 844, 865, 881, 917, 944, 993, 1028, 1030, 1052, 1095, 1104, 1128, 1145, 1180, 1185, 1188, 1200, 1209, 1214, 1243, 1310, 1323, 1354, 1393, 1450, 1467, 1479, 1483, 1498, 1500, 1502, 1506, 1508, 1518, 1568, 1693, 1701, 1880, 3078, 3080, 3118, 3160, 3167, 3191, 3195, 3211, 3220, 3229, 3238, 3245, 3794 | 29, 29, 62, 77, 93, 103, 119, 124, 140, 146, 160, 166, 183, 195, 198, 228, 256, 271, 279, 292, 320, 345, 366, 399, 422, 425, 428, 488, 499, 522, 567, 598, 654, 658, 680, 698, 718, 731, 780, 804, 837, 851, 865, 910, 945, 987, 993, 1026, 1048, 1053, 1097, 1103, 1139, 1147, 1169, 1183, 1184, 1189, 1209, 1213, 1228, 1256, 1293, 1303, 1314, 1364, 1383, 1417, 1458, 1484, 1489, 1500, 1503, 1504, 1511, 1512, 1518, 1683, 1689, 1869, 3071, 3090, 3109, 3154, 3179, 3184, 3191, 3201, 3220, 3230, 3237, 3244, 3880 |
| Rotational constants (GHz)                                                                                                                                                                                                                                                                                                                                                                                                                                                                                              | Rotational constants (GHz)                                                                                                                                                                                                                                                                                                                                                                                                                                                                                                       | Rotational constants (GHz)                                                                                                                                                                                                                                                                                                                                                                                                                                                                                               |
| 0.40525, 0.22569, 0.20737                                                                                                                                                                                                                                                                                                                                                                                                                                                                                               | 0.44567, 0.22034, 0.21429                                                                                                                                                                                                                                                                                                                                                                                                                                                                                                        | 0.50916, 0.20117, 0.19575                                                                                                                                                                                                                                                                                                                                                                                                                                                                                                |

**Table S40.** Vibrational frequencies and rotational constants for the stationary points involved in the C9-addition pathway in gas phase calculated at the M06-2X/6-31+G(d,p) level of theory.

| MCR(C9-add)<br>C <sub>1</sub> - <sup>2</sup> A                                                                                                                                                                                                                                                                                                                                                                                                                                                                          | TS(C9-add)<br>C <sub>1</sub> - <sup>2</sup> A                                                                                                                                                                                                                                                                                                                                                                                                                                                                                    | Adduct(C9-add)<br>C <sub>1</sub> - <sup>2</sup> A                                                                                                                                                                                                                                                                                                                                                                                                                                                                        |
|-------------------------------------------------------------------------------------------------------------------------------------------------------------------------------------------------------------------------------------------------------------------------------------------------------------------------------------------------------------------------------------------------------------------------------------------------------------------------------------------------------------------------|----------------------------------------------------------------------------------------------------------------------------------------------------------------------------------------------------------------------------------------------------------------------------------------------------------------------------------------------------------------------------------------------------------------------------------------------------------------------------------------------------------------------------------|--------------------------------------------------------------------------------------------------------------------------------------------------------------------------------------------------------------------------------------------------------------------------------------------------------------------------------------------------------------------------------------------------------------------------------------------------------------------------------------------------------------------------|
| Vibrational frequencies (cm <sup>-1</sup> )                                                                                                                                                                                                                                                                                                                                                                                                                                                                             | Vibrational frequencies (cm <sup>-1</sup> )                                                                                                                                                                                                                                                                                                                                                                                                                                                                                      | Vibrational frequencies (cm <sup>-1</sup> )                                                                                                                                                                                                                                                                                                                                                                                                                                                                              |
| 25, 39, 52, 84, 95, 103, 108, 116, 132, 142, 151, 153, 162, 166, 187, 195, 198, 241, 246, 282, 290, 324, 366, 388, 403, 414, 432, 465, 486, 493, 530, 541, 555, 620, 670, 676, 683, 714, 733, 735, 790, 807, 831, 854, 869, 921, 940, 996, 1020, 1031, 1049, 1092, 1107, 1127, 1142, 1181, 1186, 1189, 1202, 1210, 1214, 1242, 1311, 1320, 1355, 1398, 1446, 1480, 1482, 1485, 1499, 1501, 1505, 1508, 1517, 1519, 1694, 1698, 1835, 1905, 3076, 3079, 3121, 3160, 3166, 3192, 3194, 3210, 3222, 3232, 3240, 3245, 3665 | <b>629i</b> , 25, 35, 81, 84, 93, 108, 118, 130, 135, 149, 157, 164, 173, 195, 200, 228, 250, 270, 281, 291, 315, 343, 371, 391, 404, 422, 432, 474, 491, 544, 548, 607, 620, 668, 677, 699, 719, 731, 780, 805, 831, 844, 865, 881, 917, 944, 993, 1028, 1030, 1052, 1095, 1104, 1128, 1145, 1180, 1185, 1188, 1200, 1209, 1214, 1243, 1310, 1323, 1354, 1393, 1450, 1467, 1479, 1483, 1498, 1500, 1502, 1506, 1508, 1518, 1568, 1693, 1701, 1880, 3078, 3080, 3118, 3160, 3167, 3191, 3195, 3211, 3220, 3229, 3238, 3245, 3794 | 29, 29, 62, 77, 93, 103, 119, 124, 140, 146, 160, 166, 183, 195, 198, 228, 257, 271, 279, 292, 320, 345, 366, 399, 422, 425, 428, 488, 499, 522, 567, 598, 654, 658, 680, 698, 718, 731, 780, 804, 837, 851, 865, 910, 945, 987, 993, 1026, 1048, 1053, 1097, 1103, 1139, 1147, 1169, 1183, 1184, 1189, 1209, 1213, 1228, 1256, 1293, 1303, 1314, 1364, 1383, 1417, 1458, 1484, 1489, 1500, 1503, 1504, 1511, 1512, 1518, 1683, 1689, 1869, 3071, 3090, 3109, 3154, 3179, 3184, 3191, 3201, 3220, 3230, 3237, 3244, 3880 |
| Rotational constants (GHz)                                                                                                                                                                                                                                                                                                                                                                                                                                                                                              | Rotational constants (GHz)                                                                                                                                                                                                                                                                                                                                                                                                                                                                                                       | Rotational constants (GHz)                                                                                                                                                                                                                                                                                                                                                                                                                                                                                               |
| 0.40528, 0.22568, 0.20735                                                                                                                                                                                                                                                                                                                                                                                                                                                                                               | 0.44570, 0.22033, 0.21428                                                                                                                                                                                                                                                                                                                                                                                                                                                                                                        | 0.50917, 0.20116, 0.19574                                                                                                                                                                                                                                                                                                                                                                                                                                                                                                |

**Table S41.** Vibrational frequencies and rotational constants for the stationary points involved in the P12-addition pathway in gas phase calculated at the M06-2X/6-31+G(d,p) level of theory.

| MCR(P12-add)<br>$C_1 - ^2A$                                                                                                                                                                                                                                                                                                                                                                                                                                                                                           | TS(P12-add)<br>$C_1 - ^2A$                                                                                                                                                                                                                                                                                                                                                                                                                                                                                                      | MCP(P12-add)<br>$C_1 - ^2A$                                                                                                                                                                                                                                                                                                                                                                                                                                                                                            | Product1(P12-add)<br>$C_1 - ^2A$                                                                                                                                                                                                                                                      | Product2(P12-add)<br>$C_1 - ^1A$                                                                                                                                                                     |
|-----------------------------------------------------------------------------------------------------------------------------------------------------------------------------------------------------------------------------------------------------------------------------------------------------------------------------------------------------------------------------------------------------------------------------------------------------------------------------------------------------------------------|---------------------------------------------------------------------------------------------------------------------------------------------------------------------------------------------------------------------------------------------------------------------------------------------------------------------------------------------------------------------------------------------------------------------------------------------------------------------------------------------------------------------------------|------------------------------------------------------------------------------------------------------------------------------------------------------------------------------------------------------------------------------------------------------------------------------------------------------------------------------------------------------------------------------------------------------------------------------------------------------------------------------------------------------------------------|---------------------------------------------------------------------------------------------------------------------------------------------------------------------------------------------------------------------------------------------------------------------------------------|------------------------------------------------------------------------------------------------------------------------------------------------------------------------------------------------------|
| Vibrational frequencies ( $cm^{-1}$ )                                                                                                                                                                                                                                                                                                                                                                                                                                                                                 | Vibrational frequencies ( $cm^{-1}$ )                                                                                                                                                                                                                                                                                                                                                                                                                                                                                           | Vibrational frequencies ( $cm^{-1}$ )                                                                                                                                                                                                                                                                                                                                                                                                                                                                                  | Vibrational frequencies ( $cm^{-1}$ )                                                                                                                                                                                                                                                 | Vibrational frequencies ( $cm^{-1}$ )                                                                                                                                                                |
| 19, 34, 41, 69, 81, 85, 90, 120, 123, 133, 140, 146, 155, 161, 183, 190, 193, 199, 227, 239, 264, 287, 320, 357, 388, 403, 415, 428, 467, 477, 491, 539, 548, 619, 654, 678, 680, 707, 732, 733, 794, 807, 840, 849, 860, 920, 936, 995, 1025, 1030, 1050, 1100, 1106, 1127, 1148, 1180, 1185, 1190, 1201, 1211, 1215, 1243, 1311, 1325, 1355, 1396, 1446, 1468, 1478, 1481, 1498, 1499, 1504, 1505, 1516, 1517, 1692, 1698, 1852, 1909, 3076, 3083, 3120, 3159, 3176, 3193, 3199, 3210, 3222, 3232, 3241, 3246, 3805 | <b>190i</b> , 25, 39, 66, 73, 82, 89, 107, 125, 134, 140, 157, 162, 185, 193, 198, 228, 237, 261, 265, 291, 334, 359, 366, 385, 397, 415, 436, 468, 469, 538, 545, 604, 621, 679, 684, 705, 709, 732, 734, 795, 807, 842, 854, 862, 920, 937, 995, 1024, 1031, 1049, 1105, 1109, 1128, 1147, 1180, 1185, 1187, 1201, 1213, 1217, 1242, 1310, 1324, 1355, 1396, 1445, 1470, 1478, 1484, 1500, 1500, 1507, 1508, 1516, 1517, 1691, 1698, 1850, 1908, 3075, 3081, 3119, 3155, 3175, 3189, 3199, 3210, 3222, 3232, 3240, 3246, 3846 | 30, 41, 44, 64, 66, 78, 92, 103, 110, 124, 145, 152, 155, 160, 194, 206, 209, 229, 242, 266, 323, 340, 358, 368, 383, 414, 430, 470, 479, 527, 540, 620, 631, 671, 676, 715, 732, 733, 745, 793, 811, 829, 842, 893, 915, 921, 994, 1013, 1027, 1036, 1046, 1089, 1102, 1110, 1147, 1178, 1187, 1190, 1201, 1214, 1219, 1236, 1306, 1314, 1347, 1388, 1416, 1455, 1482, 1487, 1502, 1506, 1509, 1512, 1514, 1514, 1686, 1696, 1846, 1906, 3072, 3090, 3093, 3146, 3156, 3181, 3198, 3200, 3225, 3234, 3242, 3247, 3793 | 19, 54, 127, 140, 185, 229, 266, 338, 367, 417, 467, 527, 539, 619, 674, 680, 713, 733, 741, 742, 793, 808, 895, 922, 998, 1012, 1031, 1048, 1095, 1107, 1180, 1201, 1236, 1310, 1317, 1342, 1395, 1411, 1449, 1516, 1516, 1691, 1697, 1852, 1907, 3097, 3150, 3222, 3234, 3242, 3246 | 64, 87, 124, 140, 171, 220, 248, 295, 340, 411, 435, 466, 629, 830, 847, 938, 1050, 1116, 1142, 1188, 1189, 1211, 1215, 1484, 1485, 1505, 1506, 1512, 1513, 3079, 3080, 3163, 3164, 3196, 3200, 3844 |
| Rotational constants (GHz)                                                                                                                                                                                                                                                                                                                                                                                                                                                                                            | Rotational constants (GHz)                                                                                                                                                                                                                                                                                                                                                                                                                                                                                                      | Rotational constants (GHz)                                                                                                                                                                                                                                                                                                                                                                                                                                                                                             | Rotational constants (GHz)                                                                                                                                                                                                                                                            | Rotational constants (GHz)                                                                                                                                                                           |
| 0.42376, 0.22542, 0.21102                                                                                                                                                                                                                                                                                                                                                                                                                                                                                             | 0.45269, 0.22135, 0.21363                                                                                                                                                                                                                                                                                                                                                                                                                                                                                                       | 0.32941, 0.29421, 0.22867                                                                                                                                                                                                                                                                                                                                                                                                                                                                                              | 1.49425, 0.49220, 0.39886                                                                                                                                                                                                                                                             | 1.97226, 1.67961, 1.42457                                                                                                                                                                            |

**Table S42.** Vibrational frequencies and rotational constants for the stationary points involved in the S17-addition pathway in gas phase calculated at the M06-2X/6-31+G(d,p) level of theory.

| MCR(S17-add)<br>$C_1 - ^2A$                                                                                                                                                                                                                                                                                                                                                                                                                                                                                            | TS(S17-add)<br>$C_1 - ^2A$                                                                                                                                                                                                                                                                                                                                                                                                                                                                                                      | Adduct(S17-add)<br>$C_1 - ^2A$                                                                                                                                                                                                                                                                                                                                                                                                                                                                                          |
|------------------------------------------------------------------------------------------------------------------------------------------------------------------------------------------------------------------------------------------------------------------------------------------------------------------------------------------------------------------------------------------------------------------------------------------------------------------------------------------------------------------------|---------------------------------------------------------------------------------------------------------------------------------------------------------------------------------------------------------------------------------------------------------------------------------------------------------------------------------------------------------------------------------------------------------------------------------------------------------------------------------------------------------------------------------|-------------------------------------------------------------------------------------------------------------------------------------------------------------------------------------------------------------------------------------------------------------------------------------------------------------------------------------------------------------------------------------------------------------------------------------------------------------------------------------------------------------------------|
| Vibrational frequencies ( $\text{cm}^{-1}$ )                                                                                                                                                                                                                                                                                                                                                                                                                                                                           | Vibrational frequencies ( $\text{cm}^{-1}$ )                                                                                                                                                                                                                                                                                                                                                                                                                                                                                    | Vibrational frequencies ( $\text{cm}^{-1}$ )                                                                                                                                                                                                                                                                                                                                                                                                                                                                            |
| 29, 33, 50, 75, 87, 97, 104, 112, 128, 135, 141, 158, 165, 190, 191, 198, 199, 214, 229, 240, 262, 281, 320, 358, 389, 400, 415, 426, 467, 481, 496, 538, 545, 618, 661, 678, 684, 713, 732, 735, 793, 807, 836, 848, 857, 921, 935, 996, 1022, 1030, 1049, 1088, 1106, 1128, 1141, 1179, 1186, 1189, 1201, 1212, 1215, 1242, 1309, 1319, 1354, 1395, 1444, 1471, 1481, 1488, 1497, 1501, 1502, 1509, 1516, 1517, 1692, 1698, 1851, 1908, 3073, 3090, 3113, 3158, 3184, 3185, 3199, 3210, 3222, 3232, 3240, 3245, 3804 | <b>427i</b> , 14, 34, 45, 75, 82, 91, 96, 122, 129, 147, 148, 152, 164, 187, 189, 201, 228, 255, 258, 264, 277, 308, 352, 381, 387, 413, 422, 423, 467, 534, 538, 541, 618, 665, 678, 706, 730, 731, 792, 806, 826, 834, 844, 921, 931, 996, 1020, 1026, 1030, 1048, 1080, 1106, 1120, 1136, 1180, 1183, 1188, 1201, 1211, 1215, 1242, 1302, 1312, 1348, 1395, 1443, 1468, 1480, 1487, 1498, 1501, 1502, 1507, 1516, 1517, 1692, 1698, 1849, 1907, 3075, 3082, 3114, 3159, 3171, 3190, 3198, 3210, 3221, 3232, 3240, 3245, 3824 | 18, 30, 43, 56, 77, 84, 114, 116, 123, 124, 150, 153, 161, 170, 185, 199, 206, 230, 259, 268, 288, 298, 342, 359, 370, 380, 402, 415, 432, 468, 534, 541, 618, 673, 679, 703, 730, 732, 784, 792, 803, 811, 818, 837, 919, 930, 994, 1022, 1029, 1048, 1088, 1105, 1119, 1136, 1176, 1179, 1185, 1187, 1200, 1209, 1214, 1241, 1306, 1312, 1352, 1396, 1446, 1466, 1481, 1485, 1498, 1500, 1505, 1506, 1516, 1517, 1693, 1699, 1847, 1906, 3068, 3071, 3118, 3150, 3152, 3190, 3191, 3206, 3221, 3232, 3240, 3245, 3866 |
| Rotational constants (GHz)                                                                                                                                                                                                                                                                                                                                                                                                                                                                                             | Rotational constants (GHz)                                                                                                                                                                                                                                                                                                                                                                                                                                                                                                      | Rotational constants (GHz)                                                                                                                                                                                                                                                                                                                                                                                                                                                                                              |
| 0.46754, 0.21315, 0.19767                                                                                                                                                                                                                                                                                                                                                                                                                                                                                              | 0.46773, 0.20941, 0.20195                                                                                                                                                                                                                                                                                                                                                                                                                                                                                                       | 0.41194, 0.21380, 0.20165                                                                                                                                                                                                                                                                                                                                                                                                                                                                                               |

**Table S43.** Rate constant and branching ratio ( $\Gamma$ , %) values in gas phase calculated at the M06-2X/6-311++G(3df,3pd)//M06-2X/6-31+G(d,p) level of theory.

(A) Abstraction pathways

| T (K) | k (cm <sup>3</sup> molecule <sup>-1</sup> s <sup>-1</sup> ) |                        |                        |                        |                        |                        |                        |                        |                        |                        |                        |                        |          |
|-------|-------------------------------------------------------------|------------------------|------------------------|------------------------|------------------------|------------------------|------------------------|------------------------|------------------------|------------------------|------------------------|------------------------|----------|
|       | H20-abs                                                     | H21-abs                | H22-abs                | H23-abs                | H24-abs                | H25-abs                | H26-abs                | H27-abs                | H28-abs                | H29-abs                | H30-abs                | H31-abs                | FHT      |
| 253   | $3.40 \times 10^{-11}$                                      | $3.43 \times 10^{-11}$ | $1.15 \times 10^{-13}$ | $8.43 \times 10^{-14}$ | $1.13 \times 10^{-15}$ | $1.60 \times 10^{-15}$ | $1.05 \times 10^{-12}$ | $1.25 \times 10^{-12}$ | $4.90 \times 10^{-14}$ | $4.83 \times 10^{-14}$ | $7.13 \times 10^{-13}$ | $1.98 \times 10^{-13}$ | 7.18E-11 |
| 258   | $2.88 \times 10^{-11}$                                      | $2.90 \times 10^{-11}$ | $1.01 \times 10^{-13}$ | $7.58 \times 10^{-14}$ | $1.14 \times 10^{-15}$ | $1.62 \times 10^{-15}$ | $9.30 \times 10^{-13}$ | $1.14 \times 10^{-12}$ | $4.69 \times 10^{-14}$ | $4.62 \times 10^{-14}$ | $6.54 \times 10^{-13}$ | $1.84 \times 10^{-13}$ | 6.10E-11 |
| 263   | $2.46 \times 10^{-11}$                                      | $2.48 \times 10^{-11}$ | $8.99 \times 10^{-14}$ | $6.84 \times 10^{-14}$ | $1.17 \times 10^{-15}$ | $1.65 \times 10^{-15}$ | $8.32 \times 10^{-13}$ | $1.06 \times 10^{-12}$ | $4.51 \times 10^{-14}$ | $4.45 \times 10^{-14}$ | $6.03 \times 10^{-13}$ | $1.72 \times 10^{-13}$ | 5.22E-11 |
| 268   | $2.11 \times 10^{-11}$                                      | $2.13 \times 10^{-11}$ | $8.07 \times 10^{-14}$ | $6.29 \times 10^{-14}$ | $1.20 \times 10^{-15}$ | $1.69 \times 10^{-15}$ | $7.49 \times 10^{-13}$ | $9.83 \times 10^{-13}$ | $4.37 \times 10^{-14}$ | $4.30 \times 10^{-14}$ | $5.58 \times 10^{-13}$ | $1.61 \times 10^{-13}$ | 4.51E-11 |
| 273   | $1.83 \times 10^{-11}$                                      | $1.85 \times 10^{-11}$ | $7.30 \times 10^{-14}$ | $5.79 \times 10^{-14}$ | $1.24 \times 10^{-15}$ | $1.75 \times 10^{-15}$ | $6.79 \times 10^{-13}$ | $9.17 \times 10^{-13}$ | $4.25 \times 10^{-14}$ | $4.18 \times 10^{-14}$ | $5.20 \times 10^{-13}$ | $1.52 \times 10^{-13}$ | 3.93E-11 |
| 278   | $1.60 \times 10^{-11}$                                      | $1.61 \times 10^{-11}$ | $6.66 \times 10^{-14}$ | $5.37 \times 10^{-14}$ | $1.28 \times 10^{-15}$ | $1.81 \times 10^{-15}$ | $6.20 \times 10^{-13}$ | $8.59 \times 10^{-13}$ | $4.15 \times 10^{-14}$ | $4.08 \times 10^{-14}$ | $4.86 \times 10^{-13}$ | $1.43 \times 10^{-13}$ | 3.45E-11 |
| 283   | $1.41 \times 10^{-11}$                                      | $1.42 \times 10^{-11}$ | $6.12 \times 10^{-14}$ | $5.01 \times 10^{-14}$ | $1.34 \times 10^{-15}$ | $1.88 \times 10^{-15}$ | $5.69 \times 10^{-13}$ | $8.09 \times 10^{-13}$ | $4.06 \times 10^{-14}$ | $4.00 \times 10^{-14}$ | $4.56 \times 10^{-13}$ | $1.36 \times 10^{-13}$ | 3.04E-11 |
| 288   | $1.25 \times 10^{-11}$                                      | $1.25 \times 10^{-11}$ | $5.66 \times 10^{-14}$ | $4.70 \times 10^{-14}$ | $1.40 \times 10^{-15}$ | $1.96 \times 10^{-15}$ | $5.25 \times 10^{-13}$ | $7.64 \times 10^{-13}$ | $3.99 \times 10^{-14}$ | $3.93 \times 10^{-14}$ | $4.30 \times 10^{-13}$ | $1.29 \times 10^{-13}$ | 2.70E-11 |
| 293   | $1.11 \times 10^{-11}$                                      | $1.12 \times 10^{-11}$ | $5.28 \times 10^{-14}$ | $4.44 \times 10^{-14}$ | $1.46 \times 10^{-15}$ | $2.06 \times 10^{-15}$ | $4.87 \times 10^{-13}$ | $7.25 \times 10^{-13}$ | $3.94 \times 10^{-14}$ | $3.88 \times 10^{-14}$ | $4.07 \times 10^{-13}$ | $1.23 \times 10^{-13}$ | 2.42E-11 |
| 298   | $9.92 \times 10^{-12}$                                      | $9.99 \times 10^{-12}$ | $4.94 \times 10^{-14}$ | $4.21 \times 10^{-14}$ | $1.54 \times 10^{-15}$ | $2.16 \times 10^{-15}$ | $4.54 \times 10^{-13}$ | $6.89 \times 10^{-13}$ | $3.90 \times 10^{-14}$ | $3.84 \times 10^{-14}$ | $3.86 \times 10^{-13}$ | $1.18 \times 10^{-13}$ | 2.17E-11 |
| 303   | $8.92 \times 10^{-12}$                                      | $8.98 \times 10^{-12}$ | $4.66 \times 10^{-14}$ | $4.01 \times 10^{-14}$ | $1.62 \times 10^{-15}$ | $2.27 \times 10^{-15}$ | $4.24 \times 10^{-13}$ | $6.58 \times 10^{-13}$ | $3.86 \times 10^{-14}$ | $3.80 \times 10^{-14}$ | $3.68 \times 10^{-13}$ | $1.13 \times 10^{-13}$ | 1.96E-11 |
| 308   | $8.06 \times 10^{-12}$                                      | $8.12 \times 10^{-12}$ | $4.42 \times 10^{-14}$ | $3.84 \times 10^{-14}$ | $1.71 \times 10^{-15}$ | $2.39 \times 10^{-15}$ | $3.99 \times 10^{-13}$ | $6.30 \times 10^{-13}$ | $3.84 \times 10^{-14}$ | $3.78 \times 10^{-14}$ | $3.51 \times 10^{-13}$ | $1.09 \times 10^{-13}$ | 1.78E-11 |
| 313   | $7.31 \times 10^{-12}$                                      | $7.37 \times 10^{-12}$ | $4.20 \times 10^{-14}$ | $3.69 \times 10^{-14}$ | $1.80 \times 10^{-15}$ | $2.52 \times 10^{-15}$ | $3.76 \times 10^{-13}$ | $6.04 \times 10^{-13}$ | $3.82 \times 10^{-14}$ | $3.76 \times 10^{-14}$ | $3.37 \times 10^{-13}$ | $1.05 \times 10^{-13}$ | 1.63E-11 |
| 318   | $6.67 \times 10^{-12}$                                      | $6.72 \times 10^{-12}$ | $4.02 \times 10^{-14}$ | $3.56 \times 10^{-14}$ | $1.91 \times 10^{-15}$ | $2.66 \times 10^{-15}$ | $3.56 \times 10^{-13}$ | $5.81 \times 10^{-13}$ | $3.81 \times 10^{-14}$ | $3.75 \times 10^{-14}$ | $3.23 \times 10^{-13}$ | $1.01 \times 10^{-13}$ | 1.49E-11 |
| 323   | $6.10 \times 10^{-12}$                                      | $6.15 \times 10^{-12}$ | $3.86 \times 10^{-14}$ | $3.45 \times 10^{-14}$ | $2.02 \times 10^{-15}$ | $2.82 \times 10^{-15}$ | $3.37 \times 10^{-13}$ | $5.61 \times 10^{-13}$ | $3.81 \times 10^{-14}$ | $3.75 \times 10^{-14}$ | $3.11 \times 10^{-13}$ | $9.80 \times 10^{-14}$ | 1.37E-11 |

| T (K) | k (M <sup>-1</sup> s <sup>-1</sup> ) |          |          |          |          |          |          |          |          |          |          |          |          |
|-------|--------------------------------------|----------|----------|----------|----------|----------|----------|----------|----------|----------|----------|----------|----------|
|       | H20-abs                              | H21-abs  | H22-abs  | H23-abs  | H24-abs  | H25-abs  | H26-abs  | H27-abs  | H28-abs  | H29-abs  | H30-abs  | H31-abs  | FHT      |
| 253   | 2.05E+10                             | 2.06E+10 | 6.93E+07 | 5.07E+07 | 6.80E+05 | 9.63E+05 | 6.31E+08 | 7.50E+08 | 2.95E+07 | 2.91E+07 | 4.29E+08 | 1.19E+08 | 4.32E+10 |
| 258   | 1.73E+10                             | 1.75E+10 | 6.10E+07 | 4.57E+07 | 6.89E+05 | 9.75E+05 | 5.60E+08 | 6.89E+08 | 2.82E+07 | 2.78E+07 | 3.94E+08 | 1.11E+08 | 3.67E+10 |
| 263   | 1.48E+10                             | 1.49E+10 | 5.42E+07 | 4.14E+07 | 7.03E+05 | 9.95E+05 | 5.01E+08 | 6.37E+08 | 2.72E+07 | 2.68E+07 | 3.63E+08 | 1.03E+08 | 3.15E+10 |
| 268   | 1.27E+10                             | 1.28E+10 | 4.86E+07 | 3.79E+07 | 7.22E+05 | 1.02E+06 | 4.51E+08 | 5.92E+08 | 2.63E+07 | 2.59E+07 | 3.36E+08 | 9.70E+07 | 2.72E+10 |
| 273   | 1.10E+10                             | 1.11E+10 | 4.39E+07 | 3.49E+07 | 7.45E+05 | 1.05E+06 | 4.09E+08 | 5.52E+08 | 2.56E+07 | 2.52E+07 | 3.13E+08 | 9.12E+07 | 2.37E+10 |
| 278   | 9.65E+09                             | 9.72E+09 | 4.01E+07 | 3.23E+07 | 7.73E+05 | 1.09E+06 | 3.73E+08 | 5.18E+08 | 2.50E+07 | 2.46E+07 | 2.93E+08 | 8.62E+07 | 2.08E+10 |
| 283   | 8.48E+09                             | 8.54E+09 | 3.68E+07 | 3.02E+07 | 8.05E+05 | 1.13E+06 | 3.43E+08 | 4.87E+08 | 2.45E+07 | 2.41E+07 | 2.75E+08 | 8.17E+07 | 1.83E+10 |
| 288   | 7.50E+09                             | 7.56E+09 | 3.41E+07 | 2.83E+07 | 8.41E+05 | 1.18E+06 | 3.16E+08 | 4.60E+08 | 2.41E+07 | 2.37E+07 | 2.59E+08 | 7.77E+07 | 1.63E+10 |
| 293   | 6.67E+09                             | 6.72E+09 | 3.18E+07 | 2.67E+07 | 8.81E+05 | 1.24E+06 | 2.93E+08 | 4.36E+08 | 2.37E+07 | 2.34E+07 | 2.45E+08 | 7.42E+07 | 1.46E+10 |
| 298   | 5.97E+09                             | 6.02E+09 | 2.98E+07 | 2.54E+07 | 9.25E+05 | 1.30E+06 | 2.73E+08 | 4.15E+08 | 2.35E+07 | 2.31E+07 | 2.33E+08 | 7.10E+07 | 1.31E+10 |
| 303   | 5.37E+09                             | 5.41E+09 | 2.81E+07 | 2.42E+07 | 9.74E+05 | 1.37E+06 | 2.56E+08 | 3.96E+08 | 2.33E+07 | 2.29E+07 | 2.22E+08 | 6.81E+07 | 1.18E+10 |
| 308   | 4.85E+09                             | 4.89E+09 | 2.66E+07 | 2.31E+07 | 1.03E+06 | 1.44E+06 | 2.40E+08 | 3.79E+08 | 2.31E+07 | 2.28E+07 | 2.12E+08 | 6.55E+07 | 1.07E+10 |
| 313   | 4.40E+09                             | 4.44E+09 | 2.53E+07 | 2.22E+07 | 1.09E+06 | 1.52E+06 | 2.26E+08 | 3.64E+08 | 2.30E+07 | 2.27E+07 | 2.03E+08 | 6.31E+07 | 9.79E+09 |
| 318   | 4.02E+09                             | 4.05E+09 | 2.42E+07 | 2.14E+07 | 1.15E+06 | 1.60E+06 | 2.14E+08 | 3.50E+08 | 2.30E+07 | 2.26E+07 | 1.95E+08 | 6.10E+07 | 8.98E+09 |
| 323   | 3.68E+09                             | 3.70E+09 | 2.33E+07 | 2.07E+07 | 1.22E+06 | 1.70E+06 | 2.03E+08 | 3.38E+08 | 2.29E+07 | 2.26E+07 | 1.87E+08 | 5.90E+07 | 8.26E+09 |

| T (K) | Branching ratio ( $\square$ , %) |         |         |         |         |         |         |         |         |         |         |         |        |
|-------|----------------------------------|---------|---------|---------|---------|---------|---------|---------|---------|---------|---------|---------|--------|
|       | H20-abs                          | H21-abs | H22-abs | H23-abs | H24-abs | H25-abs | H26-abs | H27-abs | H28-abs | H29-abs | H30-abs | H31-abs | FHT    |
| 253   | 32.57%                           | 32.81%  | 0.11%   | 0.08%   | 0.00%   | 0.00%   | 1.00%   | 1.19%   | 0.05%   | 0.05%   | 0.68%   | 0.19%   | 68.73% |
| 258   | 32.08%                           | 32.32%  | 0.11%   | 0.08%   | 0.00%   | 0.00%   | 1.04%   | 1.28%   | 0.05%   | 0.05%   | 0.73%   | 0.21%   | 67.95% |
| 263   | 31.63%                           | 31.86%  | 0.12%   | 0.09%   | 0.00%   | 0.00%   | 1.07%   | 1.36%   | 0.06%   | 0.06%   | 0.78%   | 0.22%   | 67.24% |
| 268   | 31.20%                           | 31.43%  | 0.12%   | 0.09%   | 0.00%   | 0.00%   | 1.11%   | 1.45%   | 0.06%   | 0.06%   | 0.82%   | 0.24%   | 66.59% |
| 273   | 30.80%                           | 31.02%  | 0.12%   | 0.10%   | 0.00%   | 0.00%   | 1.14%   | 1.54%   | 0.07%   | 0.07%   | 0.87%   | 0.25%   | 65.99% |
| 278   | 30.42%                           | 30.64%  | 0.13%   | 0.10%   | 0.00%   | 0.00%   | 1.18%   | 1.63%   | 0.08%   | 0.08%   | 0.92%   | 0.27%   | 65.46% |
| 283   | 30.06%                           | 30.29%  | 0.13%   | 0.11%   | 0.00%   | 0.00%   | 1.21%   | 1.73%   | 0.09%   | 0.09%   | 0.97%   | 0.29%   | 64.97% |
| 288   | 29.73%                           | 29.95%  | 0.14%   | 0.11%   | 0.00%   | 0.00%   | 1.25%   | 1.82%   | 0.10%   | 0.09%   | 1.03%   | 0.31%   | 64.53% |
| 293   | 29.41%                           | 29.63%  | 0.14%   | 0.12%   | 0.00%   | 0.01%   | 1.29%   | 1.92%   | 0.10%   | 0.10%   | 1.08%   | 0.33%   | 64.14% |
| 298   | 29.12%                           | 29.33%  | 0.15%   | 0.12%   | 0.00%   | 0.01%   | 1.33%   | 2.02%   | 0.11%   | 0.11%   | 1.13%   | 0.35%   | 63.79% |
| 303   | 28.83%                           | 29.05%  | 0.15%   | 0.13%   | 0.01%   | 0.01%   | 1.37%   | 2.13%   | 0.12%   | 0.12%   | 1.19%   | 0.37%   | 63.48% |
| 308   | 28.57%                           | 28.78%  | 0.16%   | 0.14%   | 0.01%   | 0.01%   | 1.41%   | 2.23%   | 0.14%   | 0.13%   | 1.25%   | 0.39%   | 63.21% |
| 313   | 28.32%                           | 28.53%  | 0.16%   | 0.14%   | 0.01%   | 0.01%   | 1.45%   | 2.34%   | 0.15%   | 0.15%   | 1.30%   | 0.41%   | 62.97% |
| 318   | 28.08%                           | 28.29%  | 0.17%   | 0.15%   | 0.01%   | 0.01%   | 1.50%   | 2.45%   | 0.16%   | 0.16%   | 1.36%   | 0.43%   | 62.76% |
| 323   | 27.85%                           | 28.06%  | 0.18%   | 0.16%   | 0.01%   | 0.01%   | 1.54%   | 2.56%   | 0.17%   | 0.17%   | 1.42%   | 0.45%   | 62.58% |



## (a) addition pathways

| T (K) | k (cm <sup>3</sup> molecule <sup>-1</sup> s <sup>-1</sup> ) |                        |                        |                        |                        |                        |                        |                        |                        |                        |          | Overall  |
|-------|-------------------------------------------------------------|------------------------|------------------------|------------------------|------------------------|------------------------|------------------------|------------------------|------------------------|------------------------|----------|----------|
|       | C1-add                                                      | C2-add                 | C3-add                 | C4-add                 | C5-add                 | C6-add                 | C7-add                 | C9-add                 | P-12add                | S17-add                | RAF      |          |
| 253   | $7.30 \times 10^{-16}$                                      | $1.39 \times 10^{-15}$ | $8.68 \times 10^{-17}$ | $8.97 \times 10^{-17}$ | $1.39 \times 10^{-15}$ | $1.51 \times 10^{-15}$ | $1.25 \times 10^{-23}$ | $1.26 \times 10^{-23}$ | $3.26 \times 10^{-11}$ | $3.96 \times 10^{-21}$ | 3.27E-11 | 1.04E-10 |
| 258   | $8.07 \times 10^{-16}$                                      | $1.42 \times 10^{-15}$ | $9.73 \times 10^{-17}$ | $1.00 \times 10^{-16}$ | $1.43 \times 10^{-15}$ | $1.64 \times 10^{-15}$ | $1.85 \times 10^{-23}$ | $1.87 \times 10^{-23}$ | $2.87 \times 10^{-11}$ | $5.64 \times 10^{-21}$ | 2.88E-11 | 8.97E-11 |
| 263   | $8.89 \times 10^{-16}$                                      | $1.45 \times 10^{-15}$ | $1.09 \times 10^{-16}$ | $1.12 \times 10^{-16}$ | $1.46 \times 10^{-15}$ | $1.77 \times 10^{-15}$ | $2.72 \times 10^{-23}$ | $2.75 \times 10^{-23}$ | $2.54 \times 10^{-11}$ | $7.93 \times 10^{-21}$ | 2.55E-11 | 7.77E-11 |
| 268   | $9.77 \times 10^{-16}$                                      | $1.49 \times 10^{-15}$ | $1.21 \times 10^{-16}$ | $1.25 \times 10^{-16}$ | $1.50 \times 10^{-15}$ | $1.91 \times 10^{-15}$ | $3.94 \times 10^{-23}$ | $3.98 \times 10^{-23}$ | $2.26 \times 10^{-11}$ | $1.10 \times 10^{-20}$ | 2.26E-11 | 6.78E-11 |
| 273   | $1.07 \times 10^{-15}$                                      | $1.53 \times 10^{-15}$ | $1.34 \times 10^{-16}$ | $1.39 \times 10^{-16}$ | $1.53 \times 10^{-15}$ | $2.05 \times 10^{-15}$ | $5.63 \times 10^{-23}$ | $5.69 \times 10^{-23}$ | $2.02 \times 10^{-11}$ | $1.51 \times 10^{-20}$ | 2.03E-11 | 5.96E-11 |
| 278   | $1.17 \times 10^{-15}$                                      | $1.56 \times 10^{-15}$ | $1.49 \times 10^{-16}$ | $1.53 \times 10^{-16}$ | $1.57 \times 10^{-15}$ | $2.21 \times 10^{-15}$ | $7.96 \times 10^{-23}$ | $8.04 \times 10^{-23}$ | $1.82 \times 10^{-11}$ | $2.06 \times 10^{-20}$ | 1.82E-11 | 5.27E-11 |
| 283   | $1.28 \times 10^{-15}$                                      | $1.60 \times 10^{-15}$ | $1.64 \times 10^{-16}$ | $1.69 \times 10^{-16}$ | $1.61 \times 10^{-15}$ | $2.37 \times 10^{-15}$ | $1.11 \times 10^{-22}$ | $1.12 \times 10^{-22}$ | $1.64 \times 10^{-11}$ | $2.77 \times 10^{-20}$ | 1.64E-11 | 4.68E-11 |
| 288   | $1.39 \times 10^{-15}$                                      | $1.64 \times 10^{-15}$ | $1.81 \times 10^{-16}$ | $1.73 \times 10^{-16}$ | $1.65 \times 10^{-15}$ | $2.53 \times 10^{-15}$ | $1.54 \times 10^{-22}$ | $1.55 \times 10^{-22}$ | $1.49 \times 10^{-11}$ | $3.69 \times 10^{-20}$ | 1.49E-11 | 4.19E-11 |
| 293   | $1.51 \times 10^{-15}$                                      | $1.68 \times 10^{-15}$ | $1.98 \times 10^{-16}$ | $1.77 \times 10^{-16}$ | $1.69 \times 10^{-15}$ | $2.71 \times 10^{-15}$ | $2.10 \times 10^{-22}$ | $2.12 \times 10^{-22}$ | $1.35 \times 10^{-11}$ | $4.88 \times 10^{-20}$ | 1.35E-11 | 3.77E-11 |
| 298   | $1.64 \times 10^{-15}$                                      | $1.72 \times 10^{-15}$ | $2.17 \times 10^{-16}$ | $1.81 \times 10^{-16}$ | $1.73 \times 10^{-15}$ | $2.89 \times 10^{-15}$ | $2.85 \times 10^{-22}$ | $2.88 \times 10^{-22}$ | $1.23 \times 10^{-11}$ | $6.39 \times 10^{-20}$ | 1.23E-11 | 3.41E-11 |
| 303   | $1.77 \times 10^{-15}$                                      | $1.76 \times 10^{-15}$ | $2.37 \times 10^{-16}$ | $1.86 \times 10^{-16}$ | $1.77 \times 10^{-15}$ | $3.08 \times 10^{-15}$ | $3.83 \times 10^{-22}$ | $3.86 \times 10^{-22}$ | $1.13 \times 10^{-11}$ | $8.30 \times 10^{-20}$ | 1.13E-11 | 3.09E-11 |
| 308   | $1.91 \times 10^{-15}$                                      | $1.81 \times 10^{-15}$ | $2.59 \times 10^{-16}$ | $1.90 \times 10^{-16}$ | $1.81 \times 10^{-15}$ | $3.28 \times 10^{-15}$ | $5.09 \times 10^{-22}$ | $5.14 \times 10^{-22}$ | $1.04 \times 10^{-11}$ | $1.07 \times 10^{-19}$ | 1.04E-11 | 2.82E-11 |
| 313   | $2.06 \times 10^{-15}$                                      | $1.85 \times 10^{-15}$ | $2.82 \times 10^{-16}$ | $1.94 \times 10^{-16}$ | $1.86 \times 10^{-15}$ | $3.49 \times 10^{-15}$ | $6.72 \times 10^{-22}$ | $6.78 \times 10^{-22}$ | $9.56 \times 10^{-12}$ | $1.37 \times 10^{-19}$ | 9.56E-12 | 2.58E-11 |
| 318   | $2.22 \times 10^{-15}$                                      | $1.89 \times 10^{-15}$ | $3.06 \times 10^{-16}$ | $1.91 \times 10^{-16}$ | $1.90 \times 10^{-15}$ | $3.71 \times 10^{-15}$ | $8.79 \times 10^{-22}$ | $8.88 \times 10^{-22}$ | $8.83 \times 10^{-12}$ | $1.74 \times 10^{-19}$ | 8.84E-12 | 2.37E-11 |
| 323   | $2.38 \times 10^{-15}$                                      | $1.94 \times 10^{-15}$ | $3.32 \times 10^{-16}$ | $2.02 \times 10^{-16}$ | $1.94 \times 10^{-15}$ | $3.93 \times 10^{-15}$ | $1.14 \times 10^{-21}$ | $1.15 \times 10^{-21}$ | $8.19 \times 10^{-12}$ | $2.19 \times 10^{-19}$ | 8.20E-12 | 2.19E-11 |

| T (K) | k (M <sup>-1</sup> s <sup>-1</sup> ) |          |          |          |          |          |          |          |          |          |          | Overall  |
|-------|--------------------------------------|----------|----------|----------|----------|----------|----------|----------|----------|----------|----------|----------|
|       | C1-add                               | C2-add   | C3-add   | C4-add   | C5-add   | C6-add   | C7-add   | C9-add   | P-12add  | S17-add  | RAF      |          |
| 253   | 4.40E+05                             | 8.34E+05 | 5.23E+04 | 5.40E+04 | 8.38E+05 | 9.11E+05 | 7.50E-03 | 7.58E-03 | 1.97E+10 | 2.38E+00 | 1.97E+10 | 6.29E+10 |
| 258   | 4.86E+05                             | 8.55E+05 | 5.86E+04 | 6.05E+04 | 8.58E+05 | 9.86E+05 | 1.12E-02 | 1.13E-02 | 1.73E+10 | 3.40E+00 | 1.73E+10 | 5.40E+10 |
| 263   | 5.35E+05                             | 8.76E+05 | 6.55E+04 | 6.76E+04 | 8.80E+05 | 1.07E+06 | 1.64E-02 | 1.65E-02 | 1.53E+10 | 4.78E+00 | 1.53E+10 | 4.68E+10 |
| 268   | 5.88E+05                             | 8.97E+05 | 7.29E+04 | 7.52E+04 | 9.01E+05 | 1.15E+06 | 2.37E-02 | 2.40E-02 | 1.36E+10 | 6.64E+00 | 1.36E+10 | 4.08E+10 |
| 273   | 6.45E+05                             | 9.19E+05 | 8.09E+04 | 8.35E+04 | 9.23E+05 | 1.24E+06 | 3.39E-02 | 3.43E-02 | 1.22E+10 | 9.12E+00 | 1.22E+10 | 3.59E+10 |
| 278   | 7.05E+05                             | 9.42E+05 | 8.95E+04 | 9.24E+04 | 9.46E+05 | 1.33E+06 | 4.79E-02 | 4.84E-02 | 1.09E+10 | 1.24E+01 | 1.10E+10 | 3.17E+10 |
| 283   | 7.70E+05                             | 9.65E+05 | 9.88E+04 | 1.02E+05 | 9.69E+05 | 1.42E+06 | 6.70E-02 | 6.76E-02 | 9.88E+09 | 1.67E+01 | 9.88E+09 | 2.82E+10 |
| 288   | 8.38E+05                             | 9.88E+05 | 1.09E+05 | 1.12E+05 | 9.93E+05 | 1.53E+06 | 9.26E-02 | 9.35E-02 | 8.94E+09 | 2.22E+01 | 8.95E+09 | 2.52E+10 |
| 293   | 9.10E+05                             | 1.01E+06 | 1.19E+05 | 1.23E+05 | 1.02E+06 | 1.63E+06 | 1.27E-01 | 1.28E-01 | 8.13E+09 | 2.94E+01 | 8.14E+09 | 2.27E+10 |
| 298   | 9.86E+05                             | 1.04E+06 | 1.31E+05 | 1.35E+05 | 1.04E+06 | 1.74E+06 | 1.72E-01 | 1.73E-01 | 7.42E+09 | 3.85E+01 | 7.43E+09 | 2.05E+10 |
| 303   | 1.07E+06                             | 1.06E+06 | 1.43E+05 | 1.48E+05 | 1.07E+06 | 1.86E+06 | 2.30E-01 | 2.33E-01 | 6.80E+09 | 5.00E+01 | 6.80E+09 | 1.86E+10 |
| 308   | 1.15E+06                             | 1.09E+06 | 1.56E+05 | 1.61E+05 | 1.09E+06 | 1.98E+06 | 3.07E-01 | 3.10E-01 | 6.24E+09 | 6.44E+01 | 6.25E+09 | 1.70E+10 |
| 313   | 1.24E+06                             | 1.11E+06 | 1.70E+05 | 1.75E+05 | 1.12E+06 | 2.10E+06 | 4.04E-01 | 4.08E-01 | 5.75E+09 | 8.23E+01 | 5.76E+09 | 1.56E+10 |
| 318   | 1.34E+06                             | 1.14E+06 | 1.84E+05 | 1.90E+05 | 1.14E+06 | 2.23E+06 | 5.29E-01 | 5.34E-01 | 5.32E+09 | 1.05E+02 | 5.33E+09 | 1.43E+10 |
| 323   | 1.44E+06                             | 1.17E+06 | 2.00E+05 | 2.06E+05 | 1.17E+06 | 2.37E+06 | 6.87E-01 | 6.94E-01 | 4.93E+09 | 1.32E+02 | 4.94E+09 | 1.32E+10 |

| T (K) | Branching ratio ( $\Gamma$ , %) |        |        |        |        |        |        |        |         |         |        |         |
|-------|---------------------------------|--------|--------|--------|--------|--------|--------|--------|---------|---------|--------|---------|
|       | C1-add                          | C2-add | C3-add | C4-add | C5-add | C6-add | C7-add | C9-add | P-12add | S17-add | RAF    | Overall |
| 253   | 0.00%                           | 0.00%  | 0.00%  | 0.00%  | 0.00%  | 0.00%  | 0.00%  | 0.00%  | 31.26%  | 0.00%   | 31.27% | 100.00% |
| 258   | 0.00%                           | 0.00%  | 0.00%  | 0.00%  | 0.00%  | 0.00%  | 0.00%  | 0.00%  | 32.04%  | 0.00%   | 32.05% | 100.00% |
| 263   | 0.00%                           | 0.00%  | 0.00%  | 0.00%  | 0.00%  | 0.00%  | 0.00%  | 0.00%  | 32.75%  | 0.00%   | 32.76% | 100.00% |
| 268   | 0.00%                           | 0.00%  | 0.00%  | 0.00%  | 0.00%  | 0.00%  | 0.00%  | 0.00%  | 33.40%  | 0.00%   | 33.41% | 100.00% |
| 273   | 0.00%                           | 0.00%  | 0.00%  | 0.00%  | 0.00%  | 0.00%  | 0.00%  | 0.00%  | 33.99%  | 0.00%   | 34.01% | 100.00% |
| 278   | 0.00%                           | 0.00%  | 0.00%  | 0.00%  | 0.00%  | 0.00%  | 0.00%  | 0.00%  | 34.53%  | 0.00%   | 34.54% | 100.00% |
| 283   | 0.00%                           | 0.00%  | 0.00%  | 0.00%  | 0.00%  | 0.01%  | 0.00%  | 0.00%  | 35.01%  | 0.00%   | 35.03% | 100.00% |
| 288   | 0.00%                           | 0.00%  | 0.00%  | 0.00%  | 0.00%  | 0.01%  | 0.00%  | 0.00%  | 35.45%  | 0.00%   | 35.47% | 100.00% |
| 293   | 0.00%                           | 0.00%  | 0.00%  | 0.00%  | 0.00%  | 0.01%  | 0.00%  | 0.00%  | 35.84%  | 0.00%   | 35.86% | 100.00% |
| 298   | 0.00%                           | 0.01%  | 0.00%  | 0.00%  | 0.01%  | 0.01%  | 0.00%  | 0.00%  | 36.18%  | 0.00%   | 36.21% | 100.00% |
| 303   | 0.01%                           | 0.01%  | 0.00%  | 0.00%  | 0.01%  | 0.01%  | 0.00%  | 0.00%  | 36.49%  | 0.00%   | 36.52% | 100.00% |
| 308   | 0.01%                           | 0.01%  | 0.00%  | 0.00%  | 0.01%  | 0.01%  | 0.00%  | 0.00%  | 36.76%  | 0.00%   | 36.79% | 100.00% |
| 313   | 0.01%                           | 0.01%  | 0.00%  | 0.00%  | 0.01%  | 0.01%  | 0.00%  | 0.00%  | 36.99%  | 0.00%   | 37.03% | 100.00% |
| 318   | 0.01%                           | 0.01%  | 0.00%  | 0.00%  | 0.01%  | 0.02%  | 0.00%  | 0.00%  | 37.19%  | 0.00%   | 37.24% | 100.00% |
| 323   | 0.01%                           | 0.01%  | 0.00%  | 0.00%  | 0.01%  | 0.02%  | 0.00%  | 0.00%  | 37.37%  | 0.00%   | 37.42% | 100.00% |

## AQUEOUS PHASE DATA

**Table S44.** Structural data for phosmet in the aqueous phase calculated at the M06-2X/6-31+G(d,p) level of theory.

| Phosmet<br>$C_1 - 2A$                                                                                                                                                                                                                                                                                                                                                                                                                                                                                                                                                                                                                                                                                                                                                                                                                                                                                                                                                                                                  |                                                                                                                                                                                                                                                                                                                                                                                                                                                                                           |
|------------------------------------------------------------------------------------------------------------------------------------------------------------------------------------------------------------------------------------------------------------------------------------------------------------------------------------------------------------------------------------------------------------------------------------------------------------------------------------------------------------------------------------------------------------------------------------------------------------------------------------------------------------------------------------------------------------------------------------------------------------------------------------------------------------------------------------------------------------------------------------------------------------------------------------------------------------------------------------------------------------------------|-------------------------------------------------------------------------------------------------------------------------------------------------------------------------------------------------------------------------------------------------------------------------------------------------------------------------------------------------------------------------------------------------------------------------------------------------------------------------------------------|
| 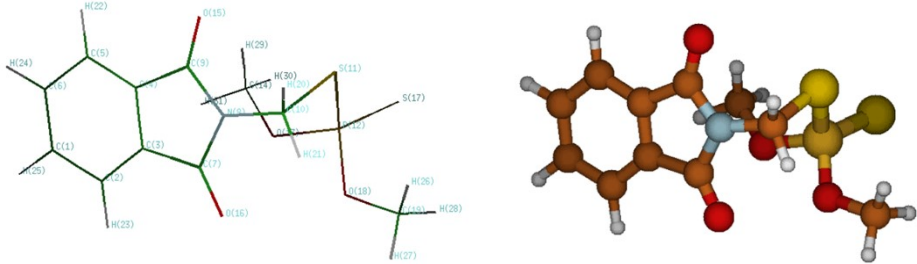                                                                                                                                                                                                                                                                                                                                                                                                                                                                                                                                                                                                                                                                                                                                                                                                                                                                                                                                     |                                                                                                                                                                                                                                                                                                                                                                                                                                                                                           |
| Optimized Cartesian coordinates                                                                                                                                                                                                                                                                                                                                                                                                                                                                                                                                                                                                                                                                                                                                                                                                                                                                                                                                                                                        | Vibrational frequencies (cm <sup>-1</sup> )                                                                                                                                                                                                                                                                                                                                                                                                                                               |
| <pre> C -4.244960 -1.594462 0.402722 C -3.125049 -1.308540 1.193617 C -2.331295 -0.247735 0.795208 C -2.628429 0.507313 -0.337595 C -3.733135 0.236676 -1.125303 C -4.543116 -0.836718 -0.733975 C -1.076936 0.284105 1.389995 N -0.685781 1.358664 0.575834 C -1.564729 1.533989 -0.496973 C 0.596808 1.999403 0.659479 S 1.768634 1.512404 -0.682468 P 2.104221 -0.504389 -0.235010 O 0.674073 -1.232801 -0.252246 C 0.032367 -1.535016 -1.509781 O -1.425329 2.373214 -1.364423 O -0.483718 -0.080562 2.382942 S 3.483207 -1.226968 -1.385053 O 2.312491 -0.591597 1.349115 C 3.500005 -0.035164 1.951155 H 0.490314 3.079565 0.545417 H 1.033746 1.775552 1.633472 H -3.958353 0.825697 -2.008365 H -2.886720 -1.895144 2.074885 H -5.418135 -1.087646 -1.324453 H -4.892953 -2.421171 0.674453 H 3.578132 1.030842 1.721205 H 3.380141 -0.178093 3.023320 H 4.383696 -0.567944 1.594032 H -0.164493 -0.611811 -2.064455 H 0.659727 -2.207369 -2.098082 H -0.906733 -2.023447 -1.251255                     </pre> | 26, 43, 65, 75, 91, 113, 124, 134, 149, 169, 181, 192, 212, 212, 233, 243, 270, 292, 331, 358, 387, 397, 412, 426, 469, 492, 524, 539, 615, 648, 679, 687, 707, 729, 735, 797, 811, 817, 830, 845, 924, 932, 1004, 1010, 1041, 1046, 1056, 1103, 1120, 1124, 1168, 1180, 1186, 1191, 1202, 1206, 1236, 1312, 1326, 1352, 1396, 1431, 1455, 1479, 1481, 1485, 1487, 1490, 1497, 1510, 1511, 1689, 1689, 1766, 1855, 3080, 3090, 3134, 3173, 3178, 3203, 3205, 3216, 3233, 3241, 3247, 3252 |
|                                                                                                                                                                                                                                                                                                                                                                                                                                                                                                                                                                                                                                                                                                                                                                                                                                                                                                                                                                                                                        | Rotational constants (GHz)                                                                                                                                                                                                                                                                                                                                                                                                                                                                |
|                                                                                                                                                                                                                                                                                                                                                                                                                                                                                                                                                                                                                                                                                                                                                                                                                                                                                                                                                                                                                        | 0.55877, 0.21047, 0.20568                                                                                                                                                                                                                                                                                                                                                                                                                                                                 |



**Table S45.** Optimized Cartesian coordinates for the stationary points involved in the H2O-abstraction pathway in aqueous phase calculated at the M06-2X/6-31+G(d,p) level of theory.

| MCR(H20-abs)                                                                                                                                                                                                                                                                                                                                                                                                                                                                                                                                                                                                                                                                                                                                                                                                                                                                                                                                                                                                                                                                                                                                        | TS(H20-abs)                                                                                                                                                                                                                                                                                                                                                                                                                                                                                                                                                                                                                                                                                                                                                                                                                                                                                                                                                                                                                                                                                                                                       | MCP(H20-abs)                                                                                                                                                                                                                                                                                                                                                                                                                                                                                                                                                                                                                                                                                                                                                                                                                                                                                                                                                                                                                                                                                                                                   | Rad(H20-abs)                                                                                                                                                                                                                                                                                                                                                                                                                                                                                                                                                                                                                                                                                                                                                                                                                                                                                                                                                                                                                               |
|-----------------------------------------------------------------------------------------------------------------------------------------------------------------------------------------------------------------------------------------------------------------------------------------------------------------------------------------------------------------------------------------------------------------------------------------------------------------------------------------------------------------------------------------------------------------------------------------------------------------------------------------------------------------------------------------------------------------------------------------------------------------------------------------------------------------------------------------------------------------------------------------------------------------------------------------------------------------------------------------------------------------------------------------------------------------------------------------------------------------------------------------------------|---------------------------------------------------------------------------------------------------------------------------------------------------------------------------------------------------------------------------------------------------------------------------------------------------------------------------------------------------------------------------------------------------------------------------------------------------------------------------------------------------------------------------------------------------------------------------------------------------------------------------------------------------------------------------------------------------------------------------------------------------------------------------------------------------------------------------------------------------------------------------------------------------------------------------------------------------------------------------------------------------------------------------------------------------------------------------------------------------------------------------------------------------|------------------------------------------------------------------------------------------------------------------------------------------------------------------------------------------------------------------------------------------------------------------------------------------------------------------------------------------------------------------------------------------------------------------------------------------------------------------------------------------------------------------------------------------------------------------------------------------------------------------------------------------------------------------------------------------------------------------------------------------------------------------------------------------------------------------------------------------------------------------------------------------------------------------------------------------------------------------------------------------------------------------------------------------------------------------------------------------------------------------------------------------------|--------------------------------------------------------------------------------------------------------------------------------------------------------------------------------------------------------------------------------------------------------------------------------------------------------------------------------------------------------------------------------------------------------------------------------------------------------------------------------------------------------------------------------------------------------------------------------------------------------------------------------------------------------------------------------------------------------------------------------------------------------------------------------------------------------------------------------------------------------------------------------------------------------------------------------------------------------------------------------------------------------------------------------------------|
| 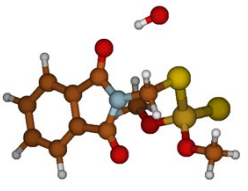                                                                                                                                                                                                                                                                                                                                                                                                                                                                                                                                                                                                                                                                                                                                                                                                                                                                                                                                                                                                                                                                   |                                                                                                                                                                                                                                                                                                                                                                                                                                                                                                                                                                                                                                                                                                                                                                                                                                                                                                                                                                                                                                                                  |                                                                                                                                                                                                                                                                                                                                                                                                                                                                                                                                                                                                                                                                                                                                                                                                                                                                                                                                                                                                                                                             |                                                                                                                                                                                                                                                                                                                                                                                                                                                                                                                                                                                                                                                                                                                                                                                                                                                                                                                                                         |
| C -4.396560 -1.604629 -0.328758<br>C -3.283116 -1.763638 0.506028<br>C -2.419701 -0.687915 0.608654<br>C -2.642414 0.501262 -0.082204<br>C -3.738098 0.671225 -0.909465<br>C -4.619770 -0.411180 -1.022070<br>C -1.156101 -0.544293 1.376774<br>N -0.685503 0.757009 1.114301<br>C -1.518714 1.423361 0.220836<br>C 0.611751 1.226393 1.518651<br>S 1.841706 1.345152 0.145429<br>P 2.031635 -0.664665 -0.429283<br>O 0.562641 -1.189665 -0.800377<br>C -0.033412 -0.841051 -2.069027<br>O -1.316083 2.544405 -0.213519<br>O -0.606778 -1.336460 2.109949<br>S 3.412847 -0.846195 -1.771022<br>O 2.168916 -1.503364 0.925896<br>C 3.353108 -1.370979 1.740199<br>H 0.543902 2.243801 1.908815<br>H 0.988980 0.560229 2.295983<br>H -3.904448 1.598353 -1.448084<br>H -3.102901 -2.688797 1.043618<br>H -5.491976 -0.324197 -1.661458<br>H -5.099275 -2.423504 -0.441978<br>H 4.232052 -1.689103 1.175823<br>H 3.467804 -0.336938 2.075657<br>H 3.195824 -2.025725 2.595042<br>H -1.026744 -1.288750 -2.059300<br>H -0.111789 0.246707 -2.164928<br>H 0.560468 -1.254033 -2.886385<br>O 1.052783 4.087894 -0.147233<br>H 0.165590 3.655787 -0.139695 | C -4.313455 -1.751388 0.413554<br>C -3.192248 -1.480186 1.207324<br>C -2.367748 -0.448464 0.794714<br>C -2.636802 0.292083 -0.355443<br>C -3.743321 0.035814 -1.145653<br>C -4.583496 -1.008234 -0.739805<br>C -1.108382 0.060338 1.394768<br>N -0.676449 1.107682 0.552869<br>C -1.551274 1.290150 -0.526697<br>C 0.603257 1.715853 0.643613<br>S 1.784584 1.272471 -0.684036<br>P 2.108421 -0.754180 -0.228309<br>O 0.671565 -1.464170 -0.251264<br>C 0.038088 -1.780967 -1.510143<br>O -1.391928 2.126059 -1.393999<br>O -0.528704 -0.296449 2.395442<br>S 3.490285 -1.478622 -1.369566<br>O 2.303153 -0.827150 1.356766<br>C 3.487457 -0.270080 1.966218<br>H 0.499119 2.881222 0.518590<br>H 1.024869 1.550360 1.636828<br>H -3.946745 0.613609 -2.041204<br>H -2.976086 -2.054540 2.102175<br>H -5.460595 -1.247719 -1.331838<br>H -4.985331 -2.554818 0.696629<br>H 4.373127 -0.803235 1.614880<br>H 3.566323 0.795731 1.735901<br>H 3.360133 -0.412612 3.037468<br>H -0.911198 -2.248675 -1.251129<br>H -0.137750 -0.865825 -2.084660<br>H 0.660730 -2.475018 -2.077637<br>O 0.229417 4.184502 0.094512<br>H -0.416162 3.967010 -0.610190 | C -4.329706 -1.486326 -0.335341<br>C -3.424457 -1.444202 0.732381<br>C -2.403773 -0.513128 0.652308<br>C -2.279959 0.346658 -0.437463<br>C -3.170024 0.318205 -1.496219<br>C -4.204787 -0.623024 -1.428086<br>C -1.289753 -0.237505 1.592506<br>N -0.538711 0.815932 1.012339<br>C -1.098640 1.213283 -0.216504<br>C 0.692524 1.228010 1.511718<br>S 2.139550 1.155980 0.531334<br>P 1.892847 -0.739055 -0.410562<br>O 0.636611 -0.587684 -1.392436<br>C 0.791217 0.077472 -2.664922<br>O -0.673307 2.121170 -0.902144<br>O -1.013791 -0.765546 2.645640<br>S 3.560945 -1.341528 -1.176088<br>O 1.142569 -1.648339 0.668520<br>C 1.820792 -2.068249 1.872310<br>H 0.391549 4.147126 1.452051<br>H 0.795395 1.286130 2.588125<br>H -3.067438 0.991696 -2.340883<br>H -3.516786 -2.111884 1.582614<br>H -4.923594 -0.684859 -2.238473<br>H -5.144278 -2.202801 -0.315449<br>H 2.033401 -1.202135 2.504646<br>H 2.743058 -2.595101 1.618296<br>H 1.130383 -2.740148 2.378379<br>H -0.216295 0.177862 -3.066641<br>H 1.238959 1.065240 -2.527307<br>H 1.406480 -0.535059 -3.326005<br>O 0.473907 4.409776 0.525567<br>H 0.150992 3.644852 0.021437 | C 4.316566 0.063232 -1.352306<br>C 3.409048 1.073571 -1.011002<br>C 2.401286 0.737746 -0.123864<br>C 2.291627 -0.544709 0.409941<br>C 3.183188 -1.550851 0.082476<br>C 4.205255 -1.223892 -0.817304<br>C 1.288066 1.561335 0.409235<br>N 0.555552 0.718192 1.276665<br>C 1.120174 -0.576521 1.319395<br>C -0.655026 1.094048 1.844665<br>S -2.105710 0.153003 1.595718<br>P -1.960887 -0.241628 -0.493488<br>O -0.696531 -1.206365 -0.682394<br>C -0.817509 -2.617962 -0.403594<br>O 0.704845 -1.482519 2.007238<br>O 1.002126 2.716514 0.182899<br>S -3.657094 -0.844589 -1.195830<br>O -1.263216 1.056562 -1.112942<br>C -1.959991 2.320649 -1.140840<br>H -0.748423 2.122669 2.169643<br>H 3.090824 -2.547787 0.501077<br>H 3.490425 2.073895 -1.423234<br>H 4.924792 -1.982854 -1.105970<br>H 5.121659 0.281876 -2.045911<br>H -2.119451 2.684409 -0.122383<br>H -2.912578 2.211981 -1.663641<br>H -1.308288 3.002844 -1.683291<br>H 0.195507 -3.014651 -0.458434<br>H -1.452232 -3.087024 -1.157197<br>H -1.226817 -2.776288 0.597589 |

**Table S46.** Optimized Cartesian coordinates for the stationary points involved in the H21-abstraction pathway in aqueous phase calculated at the M06-2X/6-31+G(d,p) level of theory.

| MCR(H21-abs)                                                                                                                                                                                                                                                                                                                                                                                                                                                                                                                                                                                                                                                                                                                                                                                                                                                                                                                                                                                                                                                                                                                                    | TS(H21-abs)                                                                                                                                                                                                                                                                                                                                                                                                                                                                                                                                                                                                                                                                                                                                                                                                                                                                                                                                                                                                                                                                                                                                   | MCP(H21-abs)                                                                                                                                                                                                                                                                                                                                                                                                                                                                                                                                                                                                                                                                                                                                                                                                                                                                                                                                                                                                                                                                                                                                    | Rad(H21-abs)                                                                                                                                                                                                                                                                                                                                                                                                                                                                                                                                                                                                                                                                                                                                                                                                                                                                                                                                                                                                                               |
|-------------------------------------------------------------------------------------------------------------------------------------------------------------------------------------------------------------------------------------------------------------------------------------------------------------------------------------------------------------------------------------------------------------------------------------------------------------------------------------------------------------------------------------------------------------------------------------------------------------------------------------------------------------------------------------------------------------------------------------------------------------------------------------------------------------------------------------------------------------------------------------------------------------------------------------------------------------------------------------------------------------------------------------------------------------------------------------------------------------------------------------------------|-----------------------------------------------------------------------------------------------------------------------------------------------------------------------------------------------------------------------------------------------------------------------------------------------------------------------------------------------------------------------------------------------------------------------------------------------------------------------------------------------------------------------------------------------------------------------------------------------------------------------------------------------------------------------------------------------------------------------------------------------------------------------------------------------------------------------------------------------------------------------------------------------------------------------------------------------------------------------------------------------------------------------------------------------------------------------------------------------------------------------------------------------|-------------------------------------------------------------------------------------------------------------------------------------------------------------------------------------------------------------------------------------------------------------------------------------------------------------------------------------------------------------------------------------------------------------------------------------------------------------------------------------------------------------------------------------------------------------------------------------------------------------------------------------------------------------------------------------------------------------------------------------------------------------------------------------------------------------------------------------------------------------------------------------------------------------------------------------------------------------------------------------------------------------------------------------------------------------------------------------------------------------------------------------------------|--------------------------------------------------------------------------------------------------------------------------------------------------------------------------------------------------------------------------------------------------------------------------------------------------------------------------------------------------------------------------------------------------------------------------------------------------------------------------------------------------------------------------------------------------------------------------------------------------------------------------------------------------------------------------------------------------------------------------------------------------------------------------------------------------------------------------------------------------------------------------------------------------------------------------------------------------------------------------------------------------------------------------------------------|
| 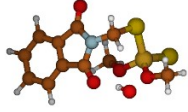                                                                                                                                                                                                                                                                                                                                                                                                                                                                                                                                                                                                                                                                                                                                                                                                                                                                                                                                                                                                                                                               |                                                                                                                                                                                                                                                                                                                                                                                                                                                                                                                                                                                                                                                                                                                                                                                                                                                                                                                                                                                                                                                              |                                                                                                                                                                                                                                                                                                                                                                                                                                                                                                                                                                                                                                                                                                                                                                                                                                                                                                                                                                                                                                                              |                                                                                                                                                                                                                                                                                                                                                                                                                                                                                                                                                                                                                                                                                                                                                                                                                                                                                                                                                         |
| C 4.434236 0.339802 -1.580995<br>C 3.234682 1.046400 -1.427072<br>C 2.436958 0.697014 -0.352335<br>C 2.804010 -0.307692 0.540598<br>C 3.986357 -1.011570 0.400160<br>C 4.802441 -0.668748 -0.685537<br>C 1.116951 1.231938 0.070168<br>N 0.759302 0.529150 1.222645<br>C 1.723146 -0.434921 1.552766<br>C -0.520801 0.606835 1.871251<br>S -1.607493 -0.851444 1.563928<br>P -2.056945 -0.610874 -0.465115<br>O -0.657982 -0.543097 -1.245723<br>C 0.111724 -1.747382 -1.449440<br>O 1.626758 -1.195065 2.493646<br>O 0.461241 2.116396 -0.446778<br>S -3.327665 -1.955933 -1.033909<br>O -2.443442 0.930223 -0.675427<br>C -3.684696 1.430336 -0.129673<br>H -0.388219 0.623225 2.954513<br>H -1.024823 1.520922 1.556611<br>H 4.266928 -1.794546 1.096864<br>H 2.942354 1.828669 -2.119809<br>H 5.738511 -1.196260 -0.836240<br>H 5.090417 0.577830 -2.411569<br>H -4.505964 -0.751753 -0.371348<br>H -3.591956 1.549920 0.952714<br>H -3.851720 2.395372 -0.605393<br>H 1.012768 -1.435477 -1.976361<br>H 0.375486 -2.195946 -0.486294<br>H -0.455272 -2.455724 -2.056465<br>O -1.819256 3.701491 0.062643<br>H -1.115529 3.035739 -0.125561 | C 4.313958 -0.617329 -1.549990<br>C 3.142035 0.109711 -1.792140<br>C 2.360152 0.419503 -0.693555<br>C 2.717028 0.031276 0.595216<br>C 3.872713 -0.686425 0.848009<br>C 4.672365 -1.007303 -0.255724<br>C 1.061637 1.136699 -0.624447<br>N 0.702215 1.161898 0.735100<br>C 1.650447 0.484048 1.523035<br>C -0.565191 1.553592 1.265381<br>S -1.747040 0.219240 1.634603<br>P -1.972002 -0.787370 -0.202658<br>O -0.501220 -1.173933 -0.703769<br>C 0.191915 -2.306724 -0.132078<br>O 1.543378 0.320627 2.719861<br>O 0.422257 1.634468 -1.527050<br>S -3.259929 -2.212500 0.007411<br>O -2.249937 0.337938 -1.300720<br>C -3.554528 0.953275 -1.384853<br>H -0.437024 2.096465 2.204604<br>H -1.078517 2.328409 0.537931<br>H 4.143535 -0.989466 1.854053<br>H 2.856352 0.410981 -2.794618<br>H 5.586843 -1.571509 -0.105482<br>H 4.955878 -0.886330 -2.382272<br>H -4.286375 0.216411 -1.720464<br>H -3.843962 1.368703 -0.416351<br>H -3.455482 1.751079 -2.118327<br>H 1.156144 -2.344603 -0.638020<br>H 0.335170 -2.159614 0.943151<br>H -0.371516 -3.221950 -0.321364<br>O -1.566931 3.285368 -0.324414<br>H -1.140599 2.913230 -1.125294 | C 4.748595 0.321478 -1.320137<br>C 3.594450 1.104160 -1.193544<br>C 2.654461 0.687784 -0.267308<br>C 2.841034 -0.456055 0.506505<br>C 3.977629 -1.236374 0.391482<br>C 4.936346 -0.825716 -0.543165<br>C 1.339717 1.276243 0.080869<br>N 0.791691 0.455253 1.088878<br>C 1.656556 -0.626403 1.383815<br>C -0.490322 0.623603 1.596463<br>S -1.628144 -0.708620 1.591408<br>P -2.200558 -0.603592 -0.453684<br>O -0.823467 -0.486231 -1.262124<br>C -0.023002 -1.662952 -1.505580<br>O 1.424875 -1.477326 2.212660<br>O 0.786844 2.250391 -0.385248<br>S -3.419798 -2.033478 -0.909018<br>O -2.668364 0.904928 -0.709892<br>C -3.888228 1.389316 -0.109311<br>H -0.837855 1.641879 1.722518<br>H -2.150055 3.420667 0.790547<br>H 4.117034 -2.127113 0.995065<br>H 3.442322 1.995129 -1.793672<br>H 5.842323 -1.409252 -0.668744<br>H 5.512538 0.609709 -2.034467<br>H -3.753954 1.494118 0.970675<br>H -4.714189 0.708947 -0.327984<br>H -4.075615 2.361147 -0.561940<br>H 0.919229 -1.297698 -1.912399<br>H 0.156090 -2.208441 -0.573367<br>H -0.525211 -2.308213 -2.228379<br>O -1.584961 3.821136 0.117264<br>H -0.861896 3.186095 -0.014791 | C 4.316404 0.063014 -1.352405<br>C 3.408969 1.073436 -1.011138<br>C 2.401213 0.737735 -0.123927<br>C 2.291479 -0.544654 0.409984<br>C 3.182968 -1.550871 0.082581<br>C 4.205008 -1.224059 -0.817286<br>C 1.288128 1.561484 0.409121<br>N 0.555535 0.718399 1.276739<br>C 1.120071 -0.576285 1.319538<br>C -0.655154 1.094375 1.844412<br>S -2.105572 0.152897 1.595770<br>P -1.960787 -0.241700 -0.493447<br>O -0.696426 -1.206454 -0.682383<br>C -0.817409 -2.618058 -0.403487<br>O 0.704830 -1.482219 2.007547<br>O 1.002193 2.716621 0.182744<br>S -3.657022 -0.844595 -1.195899<br>O -1.263089 1.056533 -1.112805<br>C -1.960008 2.320527 -1.140983<br>H -0.748668 2.123097 2.169031<br>H 3.090553 -2.547776 0.501246<br>H 3.490385 2.073735 -1.423420<br>H 4.924459 -1.983113 -1.105931<br>H 5.121494 0.281534 -2.046052<br>H -2.121100 2.683681 -0.122562<br>H -2.911781 2.211985 -1.665286<br>H -1.307595 3.003157 -1.682038<br>H 0.195557 -3.014821 -0.458707<br>H -1.452474 -3.087073 -1.156828<br>H -1.226339 -2.776296 0.597864 |

**Table S47.** Optimized Cartesian coordinates for the stationary points involved in the H22-abstraction pathway in aqueous phase calculated at the M06-2X/6-31+G(d,p) level of theory.

| MCR(H22-abs)                                                                      | TS(H22-abs)                                                                       | MCP(H22-abs)                                                                        | Rad(H22-abs)                                                                        |
|-----------------------------------------------------------------------------------|-----------------------------------------------------------------------------------|-------------------------------------------------------------------------------------|-------------------------------------------------------------------------------------|
| 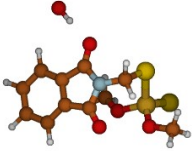 |  |  |  |
| C 3.799869 -2.210205 0.838986                                                     | C -3.826549 1.996755 0.914990                                                     | C 3.765870 -2.254687 0.815911                                                       | C -4.294299 -1.552165 0.423906                                                      |
| C 2.625188 -2.422241 0.106383                                                     | C -2.654735 2.292217 0.205986                                                     | C 2.588426 -2.433647 0.075843                                                       | C -3.175585 -1.223610 1.202270                                                      |
| C 1.990510 -1.301467 -0.397266                                                    | C -1.978585 1.233541 -0.373755                                                    | C 1.961770 -1.303273 -0.416048                                                      | C -2.369852 -0.188751 0.763281                                                      |
| C 2.491155 -0.016563 -0.192181                                                    | C -2.440572 -0.077089 -0.264180                                                   | C 2.469696 -0.017611 -0.197360                                                      | C -2.643772 0.521486 -0.411373                                                      |
| C 3.652386 0.204677 0.527366                                                      | C -3.592692 -0.351545 0.432835                                                    | C 3.622491 0.111902 0.527013                                                        | C -3.746637 0.169039 -1.139224                                                      |
| C 4.303541 -0.922511 1.044136                                                     | C -4.301388 0.683568 1.034246                                                     | C 4.295574 -0.976682 1.048804                                                       | C -4.590994 -0.856116 -0.757642                                                     |
| C 0.731155 -1.188999 -1.178218                                                    | C -0.705890 1.200353 -1.145678                                                    | C 0.701278 -1.164769 -1.195676                                                      | C -1.115527 0.363666 1.344380                                                       |
| N 0.543141 0.184713 -1.415117                                                     | N -0.481617 -0.149921 -1.472932                                                   | N 0.525307 0.213276 -1.410946                                                       | N -0.707053 1.393568 0.483879                                                       |
| C 1.551424 0.942989 -0.827939                                                     | C -1.475541 -0.973542 -0.950915                                                   | C 1.538728 0.960968 -0.817577                                                       | C -1.567664 1.529520 -0.608447                                                      |
| C -0.674116 0.746309 -1.933400                                                    | C 0.760981 -0.646044 -1.999419                                                    | C -0.689135 0.791768 -1.919163                                                      | C 0.578292 2.032218 0.559485                                                        |
| S -1.713977 1.581200 -0.657192                                                    | S 1.791384 -1.541561 -0.757453                                                    | S -1.719911 1.613428 -0.627795                                                      | S 1.768498 1.479293 -0.739200                                                       |
| P -2.288696 -0.041031 0.535756                                                    | P 2.292291 0.006696 0.561128                                                      | P -2.307803 -0.024964 0.537374                                                      | P 2.081533 -0.519640 -0.200212                                                      |
| O -0.939070 -0.732648 1.061481                                                    | O 0.912099 0.626680 1.097067                                                      | O -0.963261 -0.735235 1.051218                                                      | O 0.644749 -1.235058 -0.207813                                                      |
| C -0.188328 -0.127370 2.136237                                                    | C 0.156898 -0.061640 2.117702                                                     | C -0.207777 -0.153290 2.135635                                                      | C 0.021581 -1.589150 -1.461249                                                      |
| O 1.585456 2.161182 -0.857724                                                     | O -1.498510 -2.185560 -1.051847                                                   | O 1.588583 2.176571 -0.828447                                                       | O -1.409559 2.323661 -1.512283                                                      |
| O -0.008629 -2.062089 -1.575707                                                   | O 0.016082 2.116086 -1.471077                                                     | O -0.044352 -2.026504 -1.604532                                                     | O -0.538190 0.041138 2.359767                                                       |
| S -3.575797 0.524319 1.865769                                                     | S 3.559877 -0.617651 1.883439                                                     | S -3.591014 0.527316 1.876224                                                       | S 3.470056 -1.300239 -1.299419                                                      |
| O -2.697961 -1.220495 -0.465158                                                   | O 2.693982 1.262282 -0.345535                                                     | O -2.725172 -1.183482 -0.484332                                                     | O 2.266341 -0.541683 1.388808                                                       |
| C -3.901376 -1.110466 -1.254063                                                   | C 3.910037 1.230766 -1.121825                                                     | C -3.928757 -1.051912 -1.269808                                                     | C 3.455314 0.019568 1.983487                                                        |
| H -0.452769 1.530375 -2.659324                                                    | H 0.574951 -1.383052 -2.782305                                                    | H -0.462173 1.584970 -2.633303                                                      | H 0.478104 3.106613 0.396012                                                        |
| H -1.242527 -0.049783 -2.416528                                                   | H 1.319810 0.194204 -2.413780                                                     | H -1.263381 0.007032 -2.413804                                                      | H 0.996713 1.849914 1.550201                                                        |
| H 4.043531 1.204161 0.689987                                                      | H -3.963019 -1.520343 0.519796                                                    | H 4.633939 2.754246 0.225627                                                        | H -2.946080 -1.766401 2.113245                                                      |
| H 2.227189 -3.418907 -0.053955                                                    | H -2.288829 3.310214 0.122539                                                     | H 2.179903 -3.423478 -0.098548                                                      | H -5.461415 -1.125878 -1.347449                                                     |
| H 5.215649 -0.793959 1.617381                                                     | H -5.209545 0.483172 1.592665                                                     | H 5.207538 -0.859099 1.625476                                                       | H -4.946077 -2.361974 0.735497                                                      |
| H 4.328585 -3.060099 1.257617                                                     | H -4.381938 2.799375 1.388986                                                     | H 4.280748 -3.119557 1.221550                                                       | H 4.333793 -0.544424 1.663502                                                       |
| H -4.775319 -1.098844 -0.599748                                                   | H 4.774857 1.175029 -0.457726                                                     | H -4.801989 -1.049335 -0.614495                                                     | H 3.556406 1.072796 1.708311                                                        |
| H -3.871995 -0.206351 -1.868055                                                   | H 3.900075 0.379871 -1.808232                                                     | H -3.895649 -0.135826 -1.865581                                                     | H 3.317419 -0.073794 3.058925                                                       |
| H -3.917026 -1.993204 -1.890358                                                   | H 3.924162 2.162828 -1.683280                                                     | H -3.949015 -1.921620 -1.923688                                                     | H -0.932253 -2.045144 -1.197503                                                     |
| H 0.675860 -0.772640 2.291366                                                     | H -0.730539 0.547318 2.288340                                                     | H 0.652410 -0.806677 2.278701                                                       | H -0.145282 -0.692415 -2.066832                                                     |
| H 0.139499 0.877395 1.850922                                                      | H -0.132538 -1.058070 1.768518                                                    | H 0.126058 0.854087 1.866915                                                        | H 0.646335 -2.303241 -2.001033                                                      |
| H -0.797732 -0.086531 3.040948                                                    | H 0.747323 -0.135305 3.032792                                                     | H -0.816067 -0.124172 3.041533                                                      |                                                                                     |
| O 3.611012 3.701343 0.351773                                                      | O -4.010434 -2.782042 0.432627                                                    | O 3.916668 3.372644 0.417907                                                        |                                                                                     |
| H 2.897008 3.159359 -0.065573                                                     | H -3.185529 -2.922461 -0.080276                                                   | H 3.133668 2.984492 -0.009177                                                       |                                                                                     |



**Table S48.** Optimized Cartesian coordinates for the stationary points involved in the H23-abstraction pathway in aqueous phase calculated at the M06-2X/6-31+G(d,p) level of theory.

| MCR(H23-abs)                                                                      | TS(H23-abs)                                                                       | MCP(H23-abs)                                                                        | Rad(H23-abs)                                                                        |
|-----------------------------------------------------------------------------------|-----------------------------------------------------------------------------------|-------------------------------------------------------------------------------------|-------------------------------------------------------------------------------------|
| 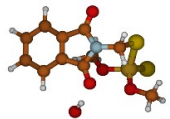 |  |  |  |
| C -4.154969 1.332251 0.555632                                                     | C -4.168340 0.780438 0.998615                                                     | C -4.208147 1.334850 0.527134                                                       | C -4.292113 -1.535000 0.721780                                                      |
| C -3.062297 1.501222 -0.304024                                                    | C -3.109339 1.225940 0.214224                                                     | C -3.102024 1.435787 -0.294876                                                      | C -3.166051 -1.088220 1.386462                                                      |
| C -2.275717 0.387786 -0.542185                                                    | C -2.235275 0.318756 -0.334812                                                    | C -2.283338 0.371893 -0.555227                                                      | C -2.341073 -0.127768 0.869462                                                      |
| C -2.556555 -0.849021 0.035249                                                    | C -2.404691 -1.047008 -0.112683                                                   | C -2.585321 -0.862177 0.031161                                                      | C -2.660112 0.419854 -0.378424                                                      |
| C -3.635789 -1.029507 0.881508                                                    | C -3.447098 -1.532420 0.657095                                                    | C -3.680661 -1.031710 0.858541                                                      | C -3.773831 0.019128 -1.094082                                                      |
| C -4.435907 0.091697 1.136127                                                     | C -4.328812 -0.595432 1.211711                                                    | C -4.492100 0.086011 1.100473                                                       | C -4.589721 -0.970163 -0.527598                                                     |
| C -1.034532 0.248981 -1.344029                                                    | C -1.012673 0.517440 -1.154120                                                    | C -1.031975 0.225394 -1.340977                                                      | C -1.080379 0.497328 1.350000                                                       |
| N -0.636177 -1.085106 -1.231781                                                   | N -0.503303 -0.760538 -1.402927                                                   | N -0.639306 -1.108112 -1.198356                                                     | N -0.704365 1.411706 0.355093                                                       |
| C -1.496055 -1.801936 -0.386523                                                   | C -1.278582 -1.752100 -0.785633                                                   | C -1.512941 -1.817435 -0.363412                                                     | C -1.595148 1.402666 -0.721941                                                      |
| C 0.666342 -1.559146 -1.614302                                                    | C 0.815064 -1.004826 -1.922812                                                    | C 0.662135 -1.595747 -1.568778                                                      | C 0.573452 2.068092 0.317231                                                        |
| S 1.819336 -1.800961 -0.191796                                                    | S 2.030687 -1.537999 -0.639853                                                    | S 1.807040 -1.817801 -0.137842                                                      | S 1.738162 1.370526 -0.933746                                                       |
| P 2.070998 0.158966 0.503353                                                      | P 2.175551 0.183605 0.544971                                                      | P 2.088650 0.159316 0.495729                                                        | P 2.099429 -0.535954 -0.147558                                                      |
| O 0.612926 0.725406 0.858864                                                      | O 0.695567 0.518400 1.069340                                                      | O 0.638714 0.756501 0.833821                                                        | O 0.674909 -1.263350 -0.016019                                                      |
| C -0.037735 0.355600 2.093590                                                     | C 0.124184 -0.236486 2.160002                                                     | C -0.021465 0.420352 2.072831                                                       | C 0.019804 -1.790111 -1.189801                                                      |
| O -1.336968 -2.966479 -0.085459                                                   | O -1.020391 -2.936590 -0.817283                                                   | O -1.360413 -2.978017 -0.046760                                                     | O -1.468085 2.079537 -1.721492                                                      |
| O -0.444870 1.091539 -1.995343                                                    | O -0.532602 1.555391 -1.562089                                                    | O -0.441160 1.056325 -2.001244                                                      | O -0.476809 0.309485 2.383403                                                       |
| S 3.407662 0.203316 1.902291                                                      | S 3.562729 -0.033210 1.876388                                                     | S 3.427237 0.229027 1.891457                                                        | S 3.469780 -1.440301 -1.172108                                                      |
| O 2.292098 1.077718 -0.788623                                                     | O 2.275332 1.421258 -0.464104                                                     | O 2.320184 1.032686 -0.825123                                                       | O 2.329237 -0.343807 1.424598                                                       |
| C 3.504668 0.950076 -1.560402                                                     | C 3.465130 1.607115 -1.259537                                                     | C 3.531111 0.866786 -1.592289                                                       | C 3.513810 0.328914 1.900147                                                        |
| H 0.591494 -2.546331 -2.072629                                                    | H 0.794172 -1.828091 -2.638766                                                    | H 0.581280 -2.590075 -2.010351                                                      | H 0.453904 3.112394 0.023739                                                        |
| H 1.096099 -0.855426 -2.328126                                                    | H 1.165599 -0.097940 -2.417134                                                    | H 1.097767 -0.907187 -2.293737                                                      | H 1.019128 2.016214 1.311453                                                        |
| H -3.847589 -1.992789 1.333919                                                    | H -3.572899 -2.595755 0.832446                                                    | H -3.899732 -1.992511 1.312298                                                      | H -4.005556 0.451454 -2.061809                                                      |
| H -2.839569 2.462442 -0.758487                                                    | H -2.920074 2.423135 0.008261                                                     | H -1.433639 3.795880 -0.388116                                                      | H -5.470036 -1.311143 -1.062918                                                     |
| H -5.289533 -0.002060 1.799251                                                    | H -5.155551 -0.937160 1.825896                                                    | H -5.356689 -0.009650 1.749361                                                      | H -4.935121 -2.301533 1.142721                                                      |
| H -4.794914 2.179754 0.777657                                                     | H -4.862916 1.483775 1.445326                                                     | H -4.844547 2.189484 0.733785                                                       | H 4.404164 -0.232334 1.609389                                                       |
| H 4.367087 1.222384 -0.948563                                                     | H 4.317634 1.817578 -0.610728                                                     | H 4.396356 1.152332 -0.990596                                                       | H 3.557000 1.346233 1.502163                                                        |
| H 3.609928 -0.071481 -1.935019                                                    | H 3.658053 0.719011 -1.867275                                                     | H 3.626756 -0.168220 -1.930914                                                      | H 3.421293 0.355684 2.984083                                                        |
| H 3.397965 1.643721 -2.392126                                                     | H 3.258415 2.461160 -1.901512                                                     | H 3.430328 1.531743 -2.447804                                                       | H -0.922949 -2.208074 -0.838176                                                     |
| H -0.997479 0.872572 2.085712                                                     | H -0.875084 0.172026 2.309430                                                     | H -0.966572 0.663280 0.968255                                                       | H -0.169912 -0.987889 -1.909971                                                     |
| H -0.193390 -0.727384 2.129437                                                    | H 0.061434 -1.296633 1.894273                                                     | H -0.206728 -0.657471 2.121558                                                      | H 0.634351 -2.570479 -1.642546                                                      |
| H 0.561990 0.683585 2.944561                                                      | H 0.725764 -0.104313 3.061181                                                     | H 0.586605 0.742283 2.920263                                                        |                                                                                     |
| O -0.427975 3.498807 -0.438804                                                    | O -2.425165 3.521185 -0.379940                                                    | O -0.502722 3.551627 -0.475726                                                      |                                                                                     |
| H -0.356231 2.720554 -1.040197                                                    | H -1.658667 3.166614 -0.879730                                                    | H -0.502696 2.780595 -1.066522                                                      |                                                                                     |

**Table S49.** Optimized Cartesian coordinates for the stationary points involved in the H24-abstraction pathway in aqueous phase calculated at the M06-2X/6-31+G(d,p) level of theory.

| MCR(H24-abs)                                                                                                                                                                                                                                                                                                                                                                                                                                                                                                                                                                                                                                                                                                                                                                                                                                                                                                                                                                                                                                                                                                                               | TS(H24-abs)                                                                                                                                                                                                                                                                                                                                                                                                                                                                                                                                                                                                                                                                                                                                                                                                                                                                                                                                                                                                                                                                                                                                   | MCP(H24-abs)                                                                                                                                                                                                                                                                                                                                                                                                                                                                                                                                                                                                                                                                                                                                                                                                                                                                                                                                                                                                                                                                                                                                   | Rad(H24-abs)                                                                                                                                                                                                                                                                                                                                                                                                                                                                                                                                                                                                                                                                                                                                                                                                                                                                                                                                                                                                                                 |
|--------------------------------------------------------------------------------------------------------------------------------------------------------------------------------------------------------------------------------------------------------------------------------------------------------------------------------------------------------------------------------------------------------------------------------------------------------------------------------------------------------------------------------------------------------------------------------------------------------------------------------------------------------------------------------------------------------------------------------------------------------------------------------------------------------------------------------------------------------------------------------------------------------------------------------------------------------------------------------------------------------------------------------------------------------------------------------------------------------------------------------------------|-----------------------------------------------------------------------------------------------------------------------------------------------------------------------------------------------------------------------------------------------------------------------------------------------------------------------------------------------------------------------------------------------------------------------------------------------------------------------------------------------------------------------------------------------------------------------------------------------------------------------------------------------------------------------------------------------------------------------------------------------------------------------------------------------------------------------------------------------------------------------------------------------------------------------------------------------------------------------------------------------------------------------------------------------------------------------------------------------------------------------------------------------|------------------------------------------------------------------------------------------------------------------------------------------------------------------------------------------------------------------------------------------------------------------------------------------------------------------------------------------------------------------------------------------------------------------------------------------------------------------------------------------------------------------------------------------------------------------------------------------------------------------------------------------------------------------------------------------------------------------------------------------------------------------------------------------------------------------------------------------------------------------------------------------------------------------------------------------------------------------------------------------------------------------------------------------------------------------------------------------------------------------------------------------------|----------------------------------------------------------------------------------------------------------------------------------------------------------------------------------------------------------------------------------------------------------------------------------------------------------------------------------------------------------------------------------------------------------------------------------------------------------------------------------------------------------------------------------------------------------------------------------------------------------------------------------------------------------------------------------------------------------------------------------------------------------------------------------------------------------------------------------------------------------------------------------------------------------------------------------------------------------------------------------------------------------------------------------------------|
|                                                                                                                                                                                                                                                                                                                                                                                                                                                                                                                                                                                                                                                                                                                                                                                                                                                                                                                                                                                                                                                           |                                                                                                                                                                                                                                                                                                                                                                                                                                                                                                                                                                                                                                                                                                                                                                                                                                                                                                                                                                                                                                                              |                                                                                                                                                                                                                                                                                                                                                                                                                                                                                                                                                                                                                                                                                                                                                                                                                                                                                                                                                                                                                                                             |                                                                                                                                                                                                                                                                                                                                                                                                                                                                                                                                                                                                                                                                                                                                                                                                                                                                                                                                                           |
| C 3.891559 1.614540 0.656737<br>C 2.836199 1.023723 1.365402<br>C 2.054744 0.112769 0.678768<br>C 2.297408 -0.207089 -0.656821<br>C 3.332932 0.370129 -1.368393<br>C 4.135619 1.293231 -0.683647<br>C 0.858253 -0.647230 1.126943<br>N 0.445610 -1.408995 0.022823<br>C 1.253145 -1.171787 -1.093454<br>C -0.810648 -2.101741 -0.046112<br>S -2.077188 -1.255247 -1.090542<br>P -2.422525 0.494945 0.005119<br>O -1.010033 1.242026 0.156144<br>C -0.455163 1.974858 -0.957261<br>O 1.076672 -1.677666 -2.183805<br>O 0.321519 -0.659565 2.214313<br>S -3.879528 1.500470 -0.777989<br>O -2.539445 0.056177 1.539761<br>C -3.679079 -0.708611 1.985186<br>H -0.680895 -3.077817 -0.516590<br>H -1.191181 -2.233058 0.967522<br>H 3.514887 0.121998 -2.408909<br>H 2.639908 1.271745 2.403356<br>H 4.960342 1.771417 -1.201675<br>H 4.531555 2.335966 1.153952<br>H -4.592526 -0.123461 1.861139<br>H -3.747802 -1.646588 1.427796<br>H -3.501750 -0.913144 3.039220<br>H 0.500223 2.364253 -0.606405<br>H -0.298088 1.306998 -1.810310<br>H -1.120087 2.795464 -1.232849<br>O 5.699363 -0.666849 0.741545<br>H 4.837054 -1.128270 0.795970 | C 3.933767 0.658608 1.417472<br>C 2.723404 0.123863 1.881990<br>C 1.908274 -0.490570 0.947488<br>C 2.258722 -0.584074 -0.397788<br>C 3.448765 -0.065923 -0.883021<br>C 4.252710 0.554780 0.068844<br>C 0.572550 -1.122546 1.121135<br>N 0.191160 -1.581471 -0.148959<br>C 1.149107 -1.268855 -1.116613<br>C -1.129188 -2.051318 -0.465871<br>S -2.147144 -0.838491 -1.415156<br>P -2.404706 0.684895 -0.001615<br>O -0.939431 1.165880 0.442234<br>C -0.164114 2.019367 -0.426628<br>O 1.038555 -1.522132 -2.298766<br>O -0.082641 -1.259445 2.131396<br>S -3.613847 2.035595 -0.679823<br>O -2.766516 -0.034842 1.381469<br>C -4.034995 -0.705945 1.531965<br>H -1.075352 -2.926932 -1.114916<br>H -1.634319 -2.316221 0.464002<br>H 3.728041 -0.133761 -1.929349<br>H 2.440045 0.193057 2.927190<br>H 5.287722 1.047349 -0.301141<br>H 4.613234 1.152997 2.103798<br>H -4.851878 0.011286 1.428736<br>H -4.131418 -1.503727 0.790755<br>H -4.027139 -1.127233 2.535280<br>H 0.777828 2.191015 0.093515<br>H 0.020341 1.518650 -1.382539<br>H -0.686470 2.964479 -0.585787<br>O 6.500388 1.359585 -0.657449<br>H 6.930840 0.495555 -0.507885 | C 3.896756 0.226976 1.574187<br>C 2.661111 -0.349757 1.913299<br>C 1.845334 -0.752059 0.868080<br>C 2.213482 -0.602479 -0.468895<br>C 3.427320 -0.038763 -0.839649<br>C 4.206281 0.347295 0.234994<br>C 0.489324 -1.359751 0.906668<br>N 0.112173 -1.559395 -0.431078<br>C 1.093040 -1.103501 -1.313688<br>C -1.216548 -1.918972 -0.842169<br>S -2.183847 -0.519009 -1.559350<br>P -2.409020 0.726649 0.108428<br>O -0.933081 1.079422 0.630466<br>C -0.129524 2.052154 -0.071119<br>O 0.993498 -1.126848 -2.523488<br>O -0.187063 -1.662689 1.865939<br>S -3.581788 2.208266 -0.310572<br>O -2.793426 -0.221851 1.338356<br>C -4.080192 -0.873839 1.371186<br>H -1.177737 -2.660032 -1.642499<br>H -1.744176 -2.336030 0.016846<br>H 3.724036 0.085833 -1.876397<br>H 2.358828 -0.469007 2.948936<br>H 6.335441 2.149482 -0.170656<br>H 4.579237 0.566553 2.346927<br>H -4.875642 -0.127650 1.423398<br>H -4.207336 -1.506467 0.488651<br>H -4.076616 -1.485585 2.271185<br>H 0.813236 2.102196 0.472785<br>H 0.047723 1.725399 -1.100824<br>H -0.625016 3.024790 -0.060166<br>O 7.061615 1.611328 -0.513477<br>H 6.877600 0.719745 -0.188087 | C -4.286264 -1.662309 0.236444<br>C -3.172001 -1.415712 1.056450<br>C -2.382040 -0.323339 0.735628<br>C -2.663244 0.509822 -0.346688<br>C -3.756581 0.296512 -1.176317<br>C -4.512894 -0.804173 -0.819921<br>C -1.137420 0.167584 1.382907<br>N -0.738561 1.300202 0.654555<br>C -1.599350 1.550086 -0.416161<br>C 0.540163 1.937799 0.805034<br>S 1.726976 1.565224 -0.559395<br>P 2.078613 -0.476076 -0.256023<br>O 0.654241 -1.212584 -0.323890<br>C 0.021760 -1.450468 -1.599647<br>O -1.453207 2.447844 -1.220305<br>O -0.555333 -0.268049 2.352977<br>S 3.462855 -1.107193 -1.452475<br>O 2.287439 -0.671724 1.318796<br>C 3.471029 -0.148659 1.957347<br>H 0.428589 3.022982 0.779844<br>H 0.967086 1.636078 1.762430<br>H -3.981913 0.936197 -2.023875<br>H -2.939382 -2.057245 1.900530<br>H -4.940993 -2.505200 0.433992<br>H 4.359141 -0.644378 1.560145<br>H 3.537324 0.932031 1.805958<br>H 3.356050 -0.370984 3.016435<br>H -0.917240 -1.954795 -1.373212<br>H -0.174487 -0.500603 -2.107338<br>H 0.655199 -2.089598 -2.217630 |

**Table S50.** Optimized Cartesian coordinates for the stationary points involved in the H25-abstraction pathway in aqueous phase calculated at the M06-2X/6-31+G(d,p) level of theory.

| MCR(H25-abs)                                                                                                                                                                                                                                                                                                                                                                                                                                                                                                                                                                                                                                                                                                                                                                                                                                                                                                                                                                                                                                                                                                                                     | TS(H25-abs)                                                                                                                                                                                                                                                                                                                                                                                                                                                                                                                                                                                                                                                                                                                                                                                                                                                                                                                                                                                                                                                                                                                                      | MCP(H25-abs)                                                                                                                                                                                                                                                                                                                                                                                                                                                                                                                                                                                                                                                                                                                                                                                                                                                                                                                                                                                                                                                                                                                                      | Rad(H25-abs)                                                                                                                                                                                                                                                                                                                                                                                                                                                                                                                                                                                                                                                                                                                                                                                                                                                                                                                                                                                                                               |
|--------------------------------------------------------------------------------------------------------------------------------------------------------------------------------------------------------------------------------------------------------------------------------------------------------------------------------------------------------------------------------------------------------------------------------------------------------------------------------------------------------------------------------------------------------------------------------------------------------------------------------------------------------------------------------------------------------------------------------------------------------------------------------------------------------------------------------------------------------------------------------------------------------------------------------------------------------------------------------------------------------------------------------------------------------------------------------------------------------------------------------------------------|--------------------------------------------------------------------------------------------------------------------------------------------------------------------------------------------------------------------------------------------------------------------------------------------------------------------------------------------------------------------------------------------------------------------------------------------------------------------------------------------------------------------------------------------------------------------------------------------------------------------------------------------------------------------------------------------------------------------------------------------------------------------------------------------------------------------------------------------------------------------------------------------------------------------------------------------------------------------------------------------------------------------------------------------------------------------------------------------------------------------------------------------------|---------------------------------------------------------------------------------------------------------------------------------------------------------------------------------------------------------------------------------------------------------------------------------------------------------------------------------------------------------------------------------------------------------------------------------------------------------------------------------------------------------------------------------------------------------------------------------------------------------------------------------------------------------------------------------------------------------------------------------------------------------------------------------------------------------------------------------------------------------------------------------------------------------------------------------------------------------------------------------------------------------------------------------------------------------------------------------------------------------------------------------------------------|--------------------------------------------------------------------------------------------------------------------------------------------------------------------------------------------------------------------------------------------------------------------------------------------------------------------------------------------------------------------------------------------------------------------------------------------------------------------------------------------------------------------------------------------------------------------------------------------------------------------------------------------------------------------------------------------------------------------------------------------------------------------------------------------------------------------------------------------------------------------------------------------------------------------------------------------------------------------------------------------------------------------------------------------|
| 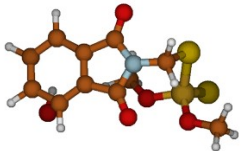                                                                                                                                                                                                                                                                                                                                                                                                                                                                                                                                                                                                                                                                                                                                                                                                                                                                                                                                                                                                                                                                |                                                                                                                                                                                                                                                                                                                                                                                                                                                                                                                                                                                                                                                                                                                                                                                                                                                                                                                                                                                                                                                                |                                                                                                                                                                                                                                                                                                                                                                                                                                                                                                                                                                                                                                                                                                                                                                                                                                                                                                                                                                                                                                                                |                                                                                                                                                                                                                                                                                                                                                                                                                                                                                                                                                                                                                                                                                                                                                                                                                                                                                                                                                         |
| C -4.352785 -0.800457 0.648770<br>C -3.163499 -0.616436 1.369099<br>C -2.224125 0.238644 0.820025<br>C -2.443575 0.889452 -0.392075<br>C -3.608530 0.709125 -1.117513<br>C -4.568123 -0.152973 -0.573424<br>C -0.891060 0.652581 1.333425<br>N -0.383689 1.568384 0.399921<br>C -1.255008 1.738105 -0.678732<br>C 0.948454 2.103752 0.439180<br>S 2.083043 1.404355 -0.836362<br>P 2.279123 -0.567392 -0.163109<br>O 0.796707 -1.176283 -0.090091<br>C 0.106965 -1.537552 -1.305053<br>O -1.029934 2.454643 -1.633644<br>O -0.325409 0.320614 2.353598<br>S 3.582639 -1.522250 -1.228604<br>O 2.500893 -0.489255 1.420060<br>C 3.744250 0.017225 1.949044<br>H 0.931667 3.174515 0.228607<br>H 1.359991 1.933532 1.435046<br>H -3.772664 1.217642 -2.061925<br>H -2.989943 -1.119313 2.314983<br>H -5.498183 -0.321989 -1.106033<br>H -5.122202 -1.453630 1.047061<br>H 4.569282 -0.632270 1.649713<br>H 3.916462 1.038917 1.600312<br>H 3.628638 0.006836 3.031052<br>H -0.881890 -1.869854 -0.992660<br>H 0.020346 -0.669356 -1.966227<br>H 0.637482 -2.347751 -1.809113<br>O -3.148103 -3.150269 -0.132756<br>H -3.061952 -2.663240 -0.978002 | C -4.117822 -0.681078 0.093619<br>C -3.018120 -0.753571 0.943953<br>C -2.043094 0.206188 0.724880<br>C -2.163342 1.164627 -0.279206<br>C -3.262613 1.219857 -1.118230<br>C -4.264148 0.258557 -0.919759<br>C -0.735662 0.407493 1.406857<br>N -0.132656 1.502665 0.770704<br>C -0.926761 1.992712 -0.270097<br>C 1.241286 1.878718 0.958104<br>S 2.346156 1.391832 -0.438943<br>P 2.296199 -0.696754 -0.301063<br>O 0.757949 -1.137138 -0.429103<br>C 0.110918 -1.139110 -1.719750<br>O -0.608865 2.909864 -0.999283<br>O -0.255908 -0.204830 2.336016<br>S 3.551085 -1.485822 -1.545408<br>O 2.439318 -1.053478 1.252332<br>C 3.686161 -0.808064 1.936072<br>H 1.333875 2.964708 1.011151<br>H 1.599054 1.435705 1.888371<br>H -3.344528 1.966075 -1.901874<br>H -2.925952 -1.508455 1.718045<br>H -5.145125 0.247356 -1.552963<br>H -5.001621 -1.486133 0.243682<br>H 4.481327 -1.408930 1.490096<br>H 3.939854 0.254414 1.891228<br>H 3.519203 -1.108837 2.968491<br>H -0.914334 -1.458680 -1.534777<br>H 0.118505 -0.131829 -2.148335<br>H 0.611627 -1.841915 -2.388290<br>O -5.810575 -2.503857 0.226626<br>H -5.358295 -3.049453 -0.445564 | C -4.125380 -0.466347 -0.148715<br>C -3.075468 -0.744279 0.706385<br>C -2.048733 0.188749 0.642831<br>C -2.102357 1.290108 -0.211005<br>C -3.177907 1.527303 -1.051897<br>C -4.234635 0.601906 -1.014875<br>C -0.754511 0.233831 1.378979<br>N -0.094726 1.385866 0.930012<br>C -0.838473 2.056003 -0.046530<br>C 1.279421 1.687187 1.221802<br>S 2.428199 1.385101 -0.190990<br>P 2.338814 -0.700054 -0.356078<br>O 0.798833 -1.083572 -0.594219<br>C 0.195640 -0.879148 -1.889755<br>O -0.465643 3.060167 -0.618440<br>O -0.326216 -0.529577 2.217194<br>S 3.624112 -1.326592 -1.660638<br>O 2.422298 -1.279477 1.133195<br>C 3.655652 -1.180210 1.875661<br>H 1.395519 2.749210 1.444363<br>H 1.588023 1.096802 2.085635<br>H -3.203470 2.387198 -1.713769<br>H -3.045171 -1.606953 1.364766<br>H -5.104640 0.730270 -1.651102<br>H -6.253306 -1.906118 0.611685<br>H 4.438836 -1.754411 1.376568<br>H 3.954723 -0.133487 1.975574<br>H 3.443314 -1.603159 2.855629<br>H -0.840155 -1.201078 -1.786723<br>H 0.234541 0.180472 -2.162078<br>H 0.707235 -1.484961 -2.640075<br>O -6.359317 -2.762598 0.175921<br>H -5.770677 -2.720332 -0.589763 | C -4.204017 -1.559981 0.624596<br>C -3.119593 -1.203616 1.404092<br>C -2.349743 -0.188305 0.851357<br>C -2.667036 0.398026 -0.373389<br>C -3.767632 0.008499 -1.119793<br>C -4.567967 -1.018483 -0.591079<br>C -1.099702 0.441980 1.358905<br>N -0.733262 1.399480 0.402524<br>C -1.620534 1.408815 -0.679298<br>C 0.539263 2.066135 0.388126<br>S 1.710893 1.420174 -0.885177<br>P 2.076972 -0.514678 -0.174461<br>O 0.654939 -1.252113 -0.073033<br>C 0.007877 -1.744428 -1.266006<br>O -1.499379 2.121198 -1.655196<br>O -0.497811 0.223266 2.387873<br>S 3.450032 -1.372956 -1.234778<br>O 2.305070 -0.385374 1.404312<br>C 3.485395 0.273631 1.908721<br>H 0.413683 3.119163 0.130770<br>H 0.984517 1.982846 1.380406<br>H -4.000924 0.471209 -2.073563<br>H -2.878198 -1.669991 2.354183<br>H -5.441857 -1.370126 -1.130475<br>H 4.378837 -0.273373 1.600739<br>H 3.526399 1.305144 1.549075<br>H 3.388888 0.259801 2.992561<br>H -0.936716 -2.173689 -0.933096<br>H -0.177930 -0.921617 -1.963697<br>H 0.626318 -2.510493 -1.737422 |

**Table S51.** Optimized Cartesian coordinates for the stationary points involved in the H26-abstraction pathway in aqueous phase calculated at the M06-2X/6-31+G(d,p) level of theory.

| MCR(H26-abs)                                                                                                                                                                                                                                                                                                                                                                                                                                                                                                                                                                                                                                                                                                                                                                                                                                                                                                                                                                                                                                                                                                                                        | TS(H26-abs)                                                                                                                                                                                                                                                                                                                                                                                                                                                                                                                                                                                                                                                                                                                                                                                                                                                                                                                                                                                                                                                                                                                                           | MCP(H26-abs)                                                                                                                                                                                                                                                                                                                                                                                                                                                                                                                                                                                                                                                                                                                                                                                                                                                                                                                                                                                                                                                                                                                                         | Rad(H26-abs)                                                                                                                                                                                                                                                                                                                                                                                                                                                                                                                                                                                                                                                                                                                                                                                                                                                                                                                                                                                                                                 |
|-----------------------------------------------------------------------------------------------------------------------------------------------------------------------------------------------------------------------------------------------------------------------------------------------------------------------------------------------------------------------------------------------------------------------------------------------------------------------------------------------------------------------------------------------------------------------------------------------------------------------------------------------------------------------------------------------------------------------------------------------------------------------------------------------------------------------------------------------------------------------------------------------------------------------------------------------------------------------------------------------------------------------------------------------------------------------------------------------------------------------------------------------------|-------------------------------------------------------------------------------------------------------------------------------------------------------------------------------------------------------------------------------------------------------------------------------------------------------------------------------------------------------------------------------------------------------------------------------------------------------------------------------------------------------------------------------------------------------------------------------------------------------------------------------------------------------------------------------------------------------------------------------------------------------------------------------------------------------------------------------------------------------------------------------------------------------------------------------------------------------------------------------------------------------------------------------------------------------------------------------------------------------------------------------------------------------|------------------------------------------------------------------------------------------------------------------------------------------------------------------------------------------------------------------------------------------------------------------------------------------------------------------------------------------------------------------------------------------------------------------------------------------------------------------------------------------------------------------------------------------------------------------------------------------------------------------------------------------------------------------------------------------------------------------------------------------------------------------------------------------------------------------------------------------------------------------------------------------------------------------------------------------------------------------------------------------------------------------------------------------------------------------------------------------------------------------------------------------------------|----------------------------------------------------------------------------------------------------------------------------------------------------------------------------------------------------------------------------------------------------------------------------------------------------------------------------------------------------------------------------------------------------------------------------------------------------------------------------------------------------------------------------------------------------------------------------------------------------------------------------------------------------------------------------------------------------------------------------------------------------------------------------------------------------------------------------------------------------------------------------------------------------------------------------------------------------------------------------------------------------------------------------------------------|
| 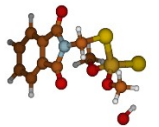                                                                                                                                                                                                                                                                                                                                                                                                                                                                                                                                                                                                                                                                                                                                                                                                                                                                                                                                                                                                                                                                   |                                                                                                                                                                                                                                                                                                                                                                                                                                                                                                                                                                                                                                                                                                                                                                                                                                                                                                                                                                                                                                                                      |                                                                                                                                                                                                                                                                                                                                                                                                                                                                                                                                                                                                                                                                                                                                                                                                                                                                                                                                                                                                                                                                   |                                                                                                                                                                                                                                                                                                                                                                                                                                                                                                                                                                                                                                                                                                                                                                                                                                                                                                                                                           |
| C -4.201053 -1.967044 -0.167025<br>C -3.082058 -1.847336 0.666499<br>C -2.429509 -0.627436 0.667457<br>C -2.861607 0.437790 -0.120126<br>C -3.966922 0.332764 -0.945737<br>C -4.634875 -0.898070 -0.957256<br>C -1.211564 -0.196388 1.402317<br>N -0.981636 1.136623 1.025534<br>C -1.924855 1.573266 0.090069<br>C 0.229927 1.849349 1.316246<br>S 1.367025 2.016294 -0.131808<br>P 1.927100 0.028148 -0.444706<br>O 0.587829 -0.820292 -0.682533<br>C -0.092401 -0.761218 -1.955855<br>O -1.917194 2.674114 -0.423615<br>O -0.530549 -0.816962 2.190673<br>S 3.295995 -0.088773 -1.814564<br>O 2.264365 -0.596215 0.990622<br>C 3.395527 -0.112779 1.747591<br>H 0.009189 2.878819 1.602869<br>H 0.742701 1.342688 2.134769<br>H -4.297593 1.164336 -1.559456<br>H -2.738183 -2.674480 1.278942<br>H -5.504850 -1.026701 -1.592698<br>H -4.741438 -2.907138 -0.203133<br>H 4.313889 -0.225224 1.166513<br>H 3.242715 0.933921 2.022243<br>H 3.436450 -0.733994 2.640100<br>H -0.964123 -1.406774 -1.853177<br>H -0.407307 0.265277 -2.168939<br>H 0.562746 -1.132171 -2.746179<br>O 3.418110 -2.942087 0.395231<br>H 3.798293 -2.383326 -0.316169 | C -4.351515 -1.952059 -0.147216<br>C -3.214831 -1.873241 0.667065<br>C -2.534035 -0.668920 0.677201<br>C -2.955718 0.420049 -0.083180<br>C -4.077702 0.355116 -0.890205<br>C -4.774364 -0.859584 -0.910766<br>C -1.295885 -0.277559 1.400202<br>N -1.046641 1.058975 1.048618<br>C -1.993501 1.532419 0.134549<br>C 0.178338 1.744921 1.343927<br>S 1.311360 1.920766 -0.106933<br>P 1.821216 -0.066903 -0.485850<br>O 0.465824 -0.882375 -0.724909<br>C -0.226969 -0.789304 -1.990854<br>O -1.970829 2.642659 -0.357732<br>O -0.613228 -0.927980 2.162580<br>S 3.175064 -0.161858 -1.870118<br>O 2.154517 -0.736123 0.940810<br>C 3.309827 -0.362014 1.668994<br>H -0.022502 2.773126 1.649236<br>H 0.689261 1.215985 2.149405<br>H -4.400136 1.205142 -1.482626<br>H -2.880002 -2.718573 1.259328<br>H -5.658737 -0.956634 -1.531768<br>H -4.914869 -2.878348 -0.188676<br>H 4.230148 -0.939349 1.247903<br>H 3.526113 0.707599 1.603621<br>H 3.178576 -0.704461 2.694495<br>H -1.109632 -1.419392 -1.887429<br>H -0.522994 0.246583 -2.183395<br>H 0.412935 -1.161323 -2.792929<br>O 5.253422 -1.628583 0.504294<br>H 4.997758 -1.281891 -0.375575 | C -4.192766 -2.111225 -0.101701<br>C -3.090269 -1.920687 0.740448<br>C -2.476480 -0.681543 0.697923<br>C -2.930653 0.335607 -0.139323<br>C -4.019867 0.160101 -0.974425<br>C -4.648449 -1.090909 -0.942268<br>C -1.281474 -0.183266 1.426990<br>N -1.088043 1.139931 0.997553<br>C -2.032103 1.507555 0.032639<br>C 0.096555 1.899993 1.272526<br>S 1.249934 2.040789 -0.166777<br>P 1.834494 0.057977 -0.434854<br>O 0.518794 -0.823228 -0.656887<br>C -0.145806 -0.829152 -1.941711<br>O -2.049258 2.584797 -0.528220<br>O -0.588747 -0.748969 2.245692<br>S 3.235631 -0.063641 -1.766990<br>O 2.152664 -0.528771 1.039194<br>C 3.196279 -0.040253 1.803389<br>H -0.156598 2.934934 1.508590<br>H 0.614902 1.447560 2.119324<br>H -4.367464 0.953844 -1.627561<br>H -2.729184 -2.710021 1.391614<br>H -5.504370 -1.274343 -1.583337<br>H -4.702522 -3.068937 -0.104897<br>H 4.770715 -1.912110 1.127123<br>H 3.614606 0.926502 1.548592<br>H 3.202279 -0.446632 2.804310<br>H -1.000555 -1.494348 -1.824316<br>H -0.484722 0.180060 -2.195083<br>H 0.530670 -1.211608 -2.708019<br>O 4.870756 -2.393009 0.292960<br>H 4.458630 -1.812347 -0.364941 | C -4.229248 -1.560109 0.430254<br>C -3.115936 -1.250462 1.221411<br>C -2.310328 -0.211876 0.789778<br>C -2.589356 0.499261 -0.375731<br>C -3.687028 0.204225 -1.164561<br>C -4.509327 -0.846657 -0.739216<br>C -1.059705 0.334873 1.378053<br>N -0.653739 1.376191 0.528287<br>C -1.517101 1.512119 -0.563507<br>C 0.624950 2.021239 0.611994<br>S 1.827091 1.487455 -0.687529<br>P 2.124679 -0.521369 -0.201073<br>O 0.693017 -1.239024 -0.209183<br>C 0.068818 -1.593635 -1.463638<br>O -1.359952 2.313901 -1.462440<br>O -0.477770 0.004986 2.389467<br>S 3.530207 -1.289294 -1.279000<br>O 2.297108 -0.572125 1.408496<br>C 3.379235 0.029953 2.025887<br>H 0.521889 3.095833 0.450702<br>H 1.044324 1.838742 1.602698<br>H -3.898336 0.758876 -2.072973<br>H -2.891373 -1.802866 2.128040<br>H -5.379932 -1.114651 -1.328705<br>H -4.886515 -2.370399 0.727898<br>H 3.846461 0.872994 1.530256<br>H 3.372032 -0.102959 3.097461<br>H -0.879444 -2.059145 -1.197228<br>H -0.107747 -0.695197 -2.063388<br>H 0.698795 -2.300090 -2.007266 |

**Table S52.** Optimized Cartesian coordinates for the stationary points involved in the H27-abstraction pathway in aqueous phase calculated at the M06-2X/6-31+G(d,p) level of theory.

| MCR(H27-abs)                                                                      | TS(H27-abs)                                                                       | MCP(H27-abs)                                                                        | Rad(H27-abs)                                                                        |
|-----------------------------------------------------------------------------------|-----------------------------------------------------------------------------------|-------------------------------------------------------------------------------------|-------------------------------------------------------------------------------------|
| 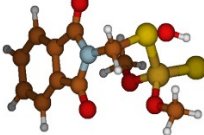 |  |  |  |
| C -4.547486 -1.156889 0.646872                                                    | C -4.537871 0.678710 -1.285357                                                    | C -4.567462 -0.665894 1.164662                                                      | C -4.223882 -1.543319 0.486770                                                      |
| C -3.396231 -0.869897 1.390606                                                    | C -3.335092 0.131387 -1.749007                                                    | C -3.359190 -0.195070 1.693477                                                      | C -3.113740 -1.199899 1.268346                                                      |
| C -2.498957 0.024763 0.835176                                                     | C -2.477587 -0.392429 -0.798011                                                   | C -2.463870 0.370209 0.803059                                                       | C -2.308259 -0.178431 0.797570                                                      |
| C -2.724647 0.618601 -0.404935                                                    | C -2.790910 -0.381183 0.559781                                                    | C -2.745425 0.471819 -0.558000                                                      | C -2.584294 0.484343 -0.396738                                                      |
| C -3.859417 0.345047 -1.147940                                                    | C -3.976826 0.154370 1.029870                                                     | C -3.936561 0.012995 -1.091778                                                      | C -3.679041 0.155860 -1.176392                                                      |
| C -4.774602 -0.560887 -0.597564                                                   | C -4.852603 0.689497 0.076967                                                     | C -4.850687 -0.563094 -0.200718                                                     | C -4.501184 -0.878267 -0.711519                                                     |
| C -1.185585 0.498793 1.343927                                                     | C -1.132924 -1.005445 -0.957837                                                   | C -1.104954 0.924535 1.037717                                                       | C -1.059775 0.392597 1.366967                                                       |
| N -0.687609 1.382603 0.372815                                                     | N -0.707729 -1.353007 0.333925                                                    | N -0.637846 1.351708 -0.215473                                                      | N -0.651707 1.398999 0.477151                                                       |
| C -1.554824 1.480218 -0.720424                                                    | C -1.647620 -0.979372 1.299277                                                    | C -1.567120 1.085797 -1.226102                                                      | C -1.512209 1.489780 -0.621788                                                      |
| C 0.665708 1.861209 0.350503                                                      | C 0.623316 -1.763534 0.645584                                                     | C 0.721249 1.737432 -0.466491                                                       | C 0.628189 2.045215 0.536884                                                        |
| S 1.727188 1.020467 -0.906093                                                     | S 1.642066 -0.459120 1.476664                                                     | S 1.709185 0.463929 -1.370750                                                       | S 1.828385 1.461508 -0.741929                                                       |
| P 1.798750 -0.946562 -0.169643                                                    | P 1.826691 0.958881 -0.043617                                                     | P 1.787574 -1.082811 0.027671                                                       | P 2.119306 -0.528332 -0.180308                                                      |
| O 0.281110 -1.457043 -0.080152                                                    | O 0.347111 1.367063 -0.504369                                                     | O 0.283140 -1.471917 0.412151                                                       | O 0.687673 -1.246375 -0.160439                                                      |
| C -0.417542 -1.881707 -1.271056                                                   | C -0.435637 2.272863 0.304971                                                     | C -0.507120 -2.284107 -0.485405                                                     | C 0.063827 -1.650933 -1.399524                                                      |
| O -1.330005 2.145240 -1.711851                                                    | O -1.496300 -1.132209 2.495050                                                    | O -1.382108 1.323414 -2.402957                                                      | O -1.353741 2.255352 -1.551526                                                      |
| O -0.621877 0.227333 2.382630                                                     | O -0.496806 -1.207267 -1.970535                                                   | O -0.486913 1.030073 2.075727                                                       | O -0.481129 0.104072 2.392902                                                       |
| S 3.039503 -1.998570 -1.215559                                                    | S 3.025277 2.380758 0.483158                                                      | S 2.965453 -2.492640 -0.564579                                                      | S 3.521604 -1.340773 -1.229977                                                      |
| O 2.029141 -0.835589 1.408051                                                     | O 2.178173 0.135306 -1.387019                                                     | O 2.115486 -0.377225 1.452157                                                       | O 2.292107 -0.516746 1.430204                                                       |
| C 3.302415 -0.392136 1.924332                                                     | C 3.431487 -0.508626 -1.523790                                                    | C 3.311256 0.284872 1.652657                                                        | C 3.330254 0.184632 2.019530                                                        |
| H 0.697063 2.914048 0.065791                                                      | H 0.625024 -2.591161 1.357274                                                     | H 0.758847 2.613514 -1.116808                                                       | H 0.526656 3.113488 0.337516                                                        |
| H 1.098856 1.734160 1.343409                                                      | H 1.123232 -2.079210 -0.275387                                                    | H 1.195337 1.968815 0.489155                                                        | H 1.048541 1.898128 1.533218                                                        |
| H -4.028967 0.806684 -2.115242                                                    | H -4.214590 0.164033 2.088545                                                     | H -4.150183 0.091392 -2.152767                                                      | H -3.888082 0.672987 -2.107215                                                      |
| H -3.211943 -1.333082 2.354495                                                    | H -3.083700 0.123801 -2.804547                                                    | H -3.131985 -0.275357 2.751498                                                      | H -2.891329 -1.715001 2.197194                                                      |
| H -5.676492 -0.808389 -1.147706                                                   | H -5.792645 1.123639 0.401096                                                     | H -5.796230 -0.939899 -0.576415                                                     | H -5.369399 -1.171224 -1.292600                                                     |
| H -5.276560 -1.857097 1.041061                                                    | H -5.238671 1.105337 -1.995352                                                    | H -5.297546 -1.121412 1.825489                                                      | H -4.880883 -2.342007 0.814859                                                      |
| H 4.081476 -1.109712 1.659569                                                     | H 4.262376 0.121061 -1.194740                                                     | H 4.183079 -0.075446 1.116686                                                       | H 4.275462 0.224178 1.490297                                                        |
| H 3.544911 0.599252 1.533062                                                      | H 3.449734 -1.467678 -0.859663                                                    | H 3.552442 2.438695 0.666381                                                        | H 3.256406 0.201153 3.097169                                                        |
| H 3.180519 -0.347718 3.004827                                                     | H 3.526678 -0.824666 -2.560532                                                    | H 3.374650 0.726688 2.637204                                                        | H -0.888391 -2.097860 -1.115850                                                     |
| H -1.415701 -2.166942 -0.939567                                                   | H -1.391283 2.373739 -0.208320                                                    | H -1.477706 -2.393123 -0.002872                                                     | H -0.105109 -0.778815 -2.039000                                                     |
| H -0.481111 -1.056409 -1.987286                                                   | H -0.586923 1.852039 1.304093                                                     | H -0.619845 -1.779224 -1.449940                                                     | H 0.690075 -2.384691 -1.910282                                                      |
| H 0.092671 -2.736926 -1.717761                                                    | H 0.063948 3.241124 0.369916                                                      | H -0.036536 -3.260172 -0.616787                                                     |                                                                                     |
| O 3.476648 2.855968 0.092144                                                      | O 3.592381 -2.780650 -0.280587                                                    | O 3.706246 3.301653 0.252738                                                        |                                                                                     |
| H 4.227105 2.241955 -0.036736                                                     | H 3.876190 -3.235816 -1.097780                                                    | H 2.835279 3.720158 0.230686                                                        |                                                                                     |

**Table S53.** Optimized Cartesian coordinates for the stationary points involved in the H28-abstraction pathway in aqueous phase calculated at the M06-2X/6-31+G(d,p) level of theory.

| MCR(H28-abs)                                                                                                                                                                                                                                                                                                                                                                                                                                                                                                                                                                                                                                                                                                                                                                                                                                                                                                                                                                                                                                                                                                                                   | TS(H28-abs)                                                                                                                                                                                                                                                                                                                                                                                                                                                                                                                                                                                                                                                                                                                                                                                                                                                                                                                                                                                                                                                                                                                                     | MCP(H28-abs)                                                                                                                                                                                                                                                                                                                                                                                                                                                                                                                                                                                                                                                                                                                                                                                                                                                                                                                                                                                                                                                                                                                                     | Rad(H28-abs)                                                                                                                                                                                                                                                                                                                                                                                                                                                                                                                                                                                                                                                                                                                                                                                                                                                                                                                                                                                                                                |
|------------------------------------------------------------------------------------------------------------------------------------------------------------------------------------------------------------------------------------------------------------------------------------------------------------------------------------------------------------------------------------------------------------------------------------------------------------------------------------------------------------------------------------------------------------------------------------------------------------------------------------------------------------------------------------------------------------------------------------------------------------------------------------------------------------------------------------------------------------------------------------------------------------------------------------------------------------------------------------------------------------------------------------------------------------------------------------------------------------------------------------------------|-------------------------------------------------------------------------------------------------------------------------------------------------------------------------------------------------------------------------------------------------------------------------------------------------------------------------------------------------------------------------------------------------------------------------------------------------------------------------------------------------------------------------------------------------------------------------------------------------------------------------------------------------------------------------------------------------------------------------------------------------------------------------------------------------------------------------------------------------------------------------------------------------------------------------------------------------------------------------------------------------------------------------------------------------------------------------------------------------------------------------------------------------|--------------------------------------------------------------------------------------------------------------------------------------------------------------------------------------------------------------------------------------------------------------------------------------------------------------------------------------------------------------------------------------------------------------------------------------------------------------------------------------------------------------------------------------------------------------------------------------------------------------------------------------------------------------------------------------------------------------------------------------------------------------------------------------------------------------------------------------------------------------------------------------------------------------------------------------------------------------------------------------------------------------------------------------------------------------------------------------------------------------------------------------------------|---------------------------------------------------------------------------------------------------------------------------------------------------------------------------------------------------------------------------------------------------------------------------------------------------------------------------------------------------------------------------------------------------------------------------------------------------------------------------------------------------------------------------------------------------------------------------------------------------------------------------------------------------------------------------------------------------------------------------------------------------------------------------------------------------------------------------------------------------------------------------------------------------------------------------------------------------------------------------------------------------------------------------------------------|
|                                                                                                                                                                                                                                                                                                                                                                                                                                                                                                                                                                                                                                                                                                                                                                                                                                                                                                                                                                                                                                                               |                                                                                                                                                                                                                                                                                                                                                                                                                                                                                                                                                                                                                                                                                                                                                                                                                                                                                                                                                                                                                                                                |                                                                                                                                                                                                                                                                                                                                                                                                                                                                                                                                                                                                                                                                                                                                                                                                                                                                                                                                                                                                                                                               |                                                                                                                                                                                                                                                                                                                                                                                                                                                                                                                                                                                                                                                                                                                                                                                                                                                                                                                                                          |
| C 4.435601 0.341388 -1.580375<br>C 3.235711 1.047402 -1.426352<br>C 2.437662 0.696794 -0.352258<br>C 2.804732 -0.308538 0.539972<br>C 3.987384 -1.011866 0.399416<br>C 4.803800 -0.667802 -0.685643<br>C 1.117354 1.230973 0.070280<br>N 0.759644 0.527196 1.222128<br>C 1.723671 -0.436813 1.551800<br>C -0.520111 0.605015 1.871365<br>S -1.607792 -0.852370 1.563366<br>P -2.057867 -0.610160 -0.465286<br>O -0.659191 -0.542735 -1.246409<br>C 0.110388 -1.747103 -1.450091<br>O 1.627309 -1.197619 2.492150<br>O 0.461423 2.115530 -0.446226<br>S -3.329726 -1.953998 -1.034473<br>O -2.443397 0.931375 -0.674550<br>C -3.684923 1.431567 -0.129440<br>H -0.386968 0.620374 2.954576<br>H -1.023789 1.519640 1.557794<br>H 4.267971 -1.795322 1.095575<br>H 2.943390 1.830176 -2.118522<br>H 5.740137 -1.194828 -0.836391<br>H 5.092060 0.580410 -2.410442<br>H -4.506538 0.754488 -0.374093<br>H -3.593748 1.548409 0.953379<br>H -3.850063 2.397973 -0.603033<br>H 1.011473 -1.435296 -1.976990<br>H 0.374055 -2.195728 -0.486953<br>H -0.456685 -2.455389 -2.057117<br>O -1.817905 3.701731 0.066903<br>H -1.114029 3.036525 -0.122622 | C 4.236430 0.194964 -1.665928<br>C 3.062771 0.949327 -1.544434<br>C 2.306431 0.749777 -0.403457<br>C 2.687053 -0.158562 0.581968<br>C 3.844800 -0.908461 0.474087<br>C 4.620016 -0.715085 -0.676064<br>C 1.009093 1.350766 -0.002725<br>N 0.672008 0.773812 1.227465<br>C 1.631563 -0.166730 1.627870<br>C -0.622291 0.878690 1.839913<br>S -1.674772 -0.629797 1.649563<br>P -1.888961 -0.771242 -0.425512<br>O -0.417932 -0.860181 -1.056682<br>C 0.314350 -2.105147 -1.025704<br>O 1.546947 -0.835146 2.637437<br>O 0.349252 2.190332 -0.583222<br>S -3.146647 -2.167594 -0.876942<br>O -2.184799 0.713002 -0.968931<br>C -3.338694 1.440314 -0.585129<br>H -0.521993 0.996025 2.920386<br>H -1.139300 1.745717 1.428906<br>H 4.134318 -1.618432 1.241810<br>H 2.756869 1.652743 -2.311852<br>H 5.534359 -1.284804 -0.804819<br>H 4.858783 0.315007 -2.546476<br>H -4.037437 1.507737 -1.419541<br>H -3.798031 1.071016 0.334995<br>H -2.964270 2.529833 -0.365769<br>H 1.273444 -1.892669 -1.497630<br>H 0.466126 -2.429763 0.008491<br>H -0.225147 -2.868206 -1.589877<br>O -2.142036 3.659531 -0.202602<br>H -1.285255 3.186569 -0.300504 | C 4.251108 -0.137011 -1.620514<br>C 3.084377 0.637384 -1.633903<br>C 2.303701 0.611645 -0.491983<br>C 2.657489 -0.143490 0.624090<br>C 3.808952 -0.909797 0.650654<br>C 4.606551 -0.894834 -0.500417<br>C 1.004121 1.272352 -0.210251<br>N 0.641529 0.889884 1.087349<br>C 1.584296 0.011196 1.639942<br>C -0.665167 1.083262 1.650345<br>S -1.712967 -0.439535 1.663414<br>P -1.943708 -0.834096 -0.373472<br>O -0.482740 -0.980672 -1.012771<br>C 0.257990 -2.211890 -0.852873<br>O 1.475485 -0.499879 2.735437<br>O 0.358769 2.015194 -0.923128<br>S -3.200131 -2.272993 -0.651746<br>O -2.263409 0.588328 -1.081470<br>C -3.361297 1.345516 -0.714974<br>H -0.588725 1.361470 2.702994<br>H -1.177618 1.874494 1.102897<br>H 4.077062 -1.500667 1.520341<br>H 2.800271 1.222676 -2.502319<br>H 5.516136 -1.485696 -0.526492<br>H 4.890645 -0.153001 -2.496855<br>H -4.115421 0.885052 -0.086983<br>H -3.597162 2.109012 -1.442197<br>H -2.353089 3.670329 0.029249<br>H 1.204918 -2.052231 -1.367894<br>H 0.434931 -2.409564 0.208982<br>H -0.289164 -3.037616 -1.311054<br>O -1.559166 4.106329 -0.310676<br>H -0.952553 3.378039 -0.526479 | C -4.223352 -1.541636 0.490978<br>C -3.113400 -1.195840 1.271761<br>C -2.307859 -0.175748 0.798113<br>C -2.583647 0.483430 -0.398228<br>C -3.678223 0.152577 -1.177135<br>C -4.500426 -0.880175 -0.709356<br>C -1.059471 0.396900 1.366041<br>N -0.651378 1.400907 0.473513<br>C -1.511567 1.488233 -0.626015<br>C 0.628707 2.046853 0.531305<br>S 1.828677 1.459206 -0.746006<br>P 2.118880 -0.529121 -0.178867<br>O 0.686766 -1.246144 -0.156302<br>C 0.062961 -1.655598 -1.393756<br>O -1.352862 2.250996 -1.558010<br>O -0.480849 0.111134 2.392764<br>S 3.520066 -1.345501 -1.226930<br>O 2.292422 -0.513155 1.431555<br>C 3.329381 0.191592 2.018894<br>H 0.527592 3.114619 0.329107<br>H 1.049138 1.902314 1.527979<br>H -3.887059 0.666931 -2.109540<br>H -2.891169 -1.708180 2.202177<br>H -5.368510 -1.174897 -1.289739<br>H -4.880405 -2.339352 0.821325<br>H 4.273863 0.233233 1.488545<br>H 3.256694 0.209115 3.096591<br>H -0.890299 -2.099323 -1.108539<br>H -0.103876 -0.786403 -2.037738<br>H 0.688155 -2.393065 -1.900440 |



**Table S54.** Optimized Cartesian coordinates for the stationary points involved in the H29-abstraction pathway in aqueous phase calculated at the M06-2X/6-31+G(d,p) level of theory.

| MCR(H29-abs)                                                                                                                                                                                                                                                                                                                                                                                                                                                                                                                                                                                                                                                                                                                                                                                                                                                                                                                                                                                                                                                                                                                                | TS(H29-abs)                                                                                                                                                                                                                                                                                                                                                                                                                                                                                                                                                                                                                                                                                                                                                                                                                                                                                                                                                                                                                                                                                                                                 | MCP(H29-abs)                                                                                                                                                                                                                                                                                                                                                                                                                                                                                                                                                                                                                                                                                                                                                                                                                                                                                                                                                                                                                                                                                                                          | Rad(H29-abs)                                                                                                                                                                                                                                                                                                                                                                                                                                                                                                                                                                                                                                                                                                                                                                                                                                                                                                                                                                                                                                  |
|---------------------------------------------------------------------------------------------------------------------------------------------------------------------------------------------------------------------------------------------------------------------------------------------------------------------------------------------------------------------------------------------------------------------------------------------------------------------------------------------------------------------------------------------------------------------------------------------------------------------------------------------------------------------------------------------------------------------------------------------------------------------------------------------------------------------------------------------------------------------------------------------------------------------------------------------------------------------------------------------------------------------------------------------------------------------------------------------------------------------------------------------|---------------------------------------------------------------------------------------------------------------------------------------------------------------------------------------------------------------------------------------------------------------------------------------------------------------------------------------------------------------------------------------------------------------------------------------------------------------------------------------------------------------------------------------------------------------------------------------------------------------------------------------------------------------------------------------------------------------------------------------------------------------------------------------------------------------------------------------------------------------------------------------------------------------------------------------------------------------------------------------------------------------------------------------------------------------------------------------------------------------------------------------------|---------------------------------------------------------------------------------------------------------------------------------------------------------------------------------------------------------------------------------------------------------------------------------------------------------------------------------------------------------------------------------------------------------------------------------------------------------------------------------------------------------------------------------------------------------------------------------------------------------------------------------------------------------------------------------------------------------------------------------------------------------------------------------------------------------------------------------------------------------------------------------------------------------------------------------------------------------------------------------------------------------------------------------------------------------------------------------------------------------------------------------------|-----------------------------------------------------------------------------------------------------------------------------------------------------------------------------------------------------------------------------------------------------------------------------------------------------------------------------------------------------------------------------------------------------------------------------------------------------------------------------------------------------------------------------------------------------------------------------------------------------------------------------------------------------------------------------------------------------------------------------------------------------------------------------------------------------------------------------------------------------------------------------------------------------------------------------------------------------------------------------------------------------------------------------------------------|
| 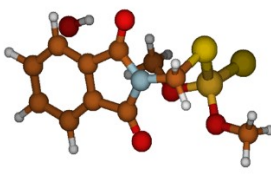                                                                                                                                                                                                                                                                                                                                                                                                                                                                                                                                                                                                                                                                                                                                                                                                                                                                                                                                                                                                                                                           |                                                                                                                                                                                                                                                                                                                                                                                                                                                                                                                                                                                                                                                                                                                                                                                                                                                                                                                                                                                                                                                           |                                                                                                                                                                                                                                                                                                                                                                                                                                                                                                                                                                                                                                                                                                                                                                                                                                                                                                                                                                                                                                                    |                                                                                                                                                                                                                                                                                                                                                                                                                                                                                                                                                                                                                                                                                                                                                                                                                                                                                                                                                            |
| C 4.218368 0.149401 1.513730<br>C 2.994156 -0.449196 1.833358<br>C 2.155012 -0.764866 0.778605<br>C 2.506756 -0.502754 -0.543470<br>C 3.718304 0.079699 -0.874689<br>C 4.575295 0.407753 0.185862<br>C 0.807392 -1.395520 0.783730<br>N 0.416172 -1.482074 -0.560352<br>C 1.381881 -0.940375 -1.412749<br>C -0.895615 -1.870837 -0.996482<br>S -1.935591 -0.465168 -1.585676<br>P -2.300886 0.546655 0.209329<br>O -0.870519 0.910938 0.836247<br>C -0.073135 1.967964 0.264545<br>O 1.263861 -0.865713 -2.619514<br>O 0.151642 -1.795893 1.722010<br>S -3.545075 2.001692 -0.075354<br>O -2.672300 -0.570434 1.294276<br>C -3.928346 -1.274373 1.199448<br>H -0.824553 -2.537175 -1.857852<br>H -1.396655 -2.386901 -0.176163<br>H 3.990937 0.276228 -1.906688<br>H 2.713421 -0.653854 2.861337<br>H 5.533466 0.870381 -0.027157<br>H 4.905052 0.418375 2.309405<br>H -4.758272 -0.572833 1.305871<br>H -3.995419 -1.803304 0.245053<br>H -3.928522 -1.986859 2.022053<br>H 0.829069 2.014096 0.873146<br>H 0.181934 1.729629 -0.773965<br>H -0.612624 2.916041 0.314748<br>O 3.295447 2.865686 -0.396055<br>H 2.547464 2.508438 -0.917859 | C 4.342401 0.854673 0.928844<br>C 3.169642 0.448282 1.578275<br>C 2.274174 -0.305266 0.840460<br>C 2.527545 -0.661662 -0.482776<br>C 3.681262 -0.265371 -1.136315<br>C 4.591219 0.508289 -0.403470<br>C 0.959466 -0.879154 1.230327<br>N 0.501502 -1.594293 0.113614<br>C 1.386046 -1.486690 -0.962605<br>C -0.799271 -2.193855 0.020006<br>S -1.973218 -1.299396 -1.088509<br>P -2.234313 0.498899 -0.056809<br>O -0.767425 1.164307 0.069657<br>C -0.175216 1.792306 -1.056690<br>O 1.201922 -1.991924 -2.051972<br>O 0.372158 -0.799297 2.288320<br>S -3.615739 1.567264 -0.885991<br>O -2.375476 0.135913 1.492110<br>C -3.567485 -0.525055 1.969942<br>H -0.726076 -3.191083 -0.417910<br>H -1.219641 -2.266603 1.023951<br>H 3.872775 -0.542038 -2.167894<br>H 2.968490 0.718719 2.609702<br>H 5.508006 0.843871 -0.876849<br>H 5.070801 1.452615 1.466516<br>H -4.428671 0.136048 1.856420<br>H -3.727628 -1.459438 1.425358<br>H -3.384861 -0.732836 3.022382<br>H 0.729507 2.400295 -0.628521<br>H 0.221786 1.064980 -1.770305<br>H -0.839619 2.528435 -1.514628<br>O 1.883618 3.031605 -0.171826<br>H 2.525561 2.393920 -0.545686 | C 4.288886 1.316856 -0.530469<br>C 3.172130 1.526263 0.288716<br>C 2.348260 0.437758 0.513428<br>C 2.611945 -0.812196 -0.043950<br>C 3.712456 -1.032238 -0.852049<br>C 4.553595 0.062783 -1.088908<br>C 1.091826 0.338403 1.298136<br>N 0.665397 -0.990451 1.186844<br>C 1.520240 -1.735547 0.365036<br>C -0.606541 -1.466409 1.652586<br>S -1.824199 -1.811738 0.308522<br>P -2.140210 0.090480 -0.483252<br>O -0.678461 0.639311 -0.949099<br>C 0.049971 0.007390 -1.940436<br>O 1.345809 -2.903323 0.082636<br>O 0.515746 1.197619 1.936221<br>S -3.514130 0.053398 -1.837431<br>O -2.276979 1.109033 0.738007<br>C -3.478066 1.104253 1.542060<br>H -0.491923 -2.426768 2.158469<br>H -1.018530 -0.733031 2.346715<br>H 3.911794 -2.006261 -1.286799<br>H 2.960014 2.497302 0.724650<br>H 5.427438 -0.063134 -1.719614<br>H 4.961119 2.142931 -0.737291<br>H -4.334975 1.392529 0.930400<br>H -3.634480 0.115313 1.980579<br>H -3.307005 1.839117 2.325912<br>H -0.261516 2.605541 -0.553145<br>H 0.902649 0.591346 -2.259084<br>H -0.475168 -0.670599 -2.603592<br>O 0.123830 3.335986 -0.046757<br>H 0.391458 2.912119 0.783215 | C 4.311670 -1.522963 0.534309<br>C 3.187661 -1.739630 -0.272884<br>C 2.363737 -0.652799 -0.504662<br>C 2.634008 0.602520 0.036956<br>C 3.741464 0.829952 0.833704<br>C 4.583389 -0.263109 1.075999<br>C 1.099132 -0.561181 -1.279933<br>N 0.678326 0.773626 -1.178204<br>C 1.540928 1.523861 -0.372954<br>C -0.590350 1.253506 -1.647465<br>S -1.804619 1.621325 -0.306258<br>P -2.143932 -0.278274 0.485532<br>O -0.693129 -0.850657 0.945195<br>C 0.045076 -0.215503 1.929272<br>O 1.373784 2.696006 -0.101232<br>O 0.516052 -1.423355 -1.903164<br>S -3.516531 -0.224240 1.842377<br>O -2.306777 -1.287265 -0.741044<br>C -3.504082 -1.244625 -1.548712<br>H -0.469150 2.207361 -2.164049<br>H -1.008530 0.515981 -2.333575<br>H 3.945272 1.808539 1.256003<br>H 2.969997 -2.715811 -0.693871<br>H 5.462611 -0.131327 1.697991<br>H 4.983813 -2.348078 0.745406<br>H -4.371446 -1.510601 -0.941564<br>H -3.630634 -0.249825 -1.983585<br>H -3.352083 -1.980680 -2.335396<br>H 0.893506 -0.803153 2.251375<br>H -0.469490 0.474933 2.587991 |

**Table S55.** Optimized Cartesian coordinates for the stationary points involved in the H30-abstraction pathway in aqueous phase calculated at the M06-2X/6-31+G(d,p) level of theory.

| MCR(H30-abs)                                                                                                                                                                                                                                                                                                                                                                                                                                                                                                                                                                                                                                                                                                                                                                                                                                                                                                                                                                                                                                                                                                                                       | TS(H30-abs)                                                                                                                                                                                                                                                                                                                                                                                                                                                                                                                                                                                                                                                                                                                                                                                                                                                                                                                                                                                                                                                                                                                                         | MCP(H30-abs)                                                                                                                                                                                                                                                                                                                                                                                                                                                                                                                                                                                                                                                                                                                                                                                                                                                                                                                                                                                                                                                                                                                                      | Rad(H30-abs)                                                                                                                                                                                                                                                                                                                                                                                                                                                                                                                                                                                                                                                                                                                                                                                                                                                                                                                                                                                                                                  |
|----------------------------------------------------------------------------------------------------------------------------------------------------------------------------------------------------------------------------------------------------------------------------------------------------------------------------------------------------------------------------------------------------------------------------------------------------------------------------------------------------------------------------------------------------------------------------------------------------------------------------------------------------------------------------------------------------------------------------------------------------------------------------------------------------------------------------------------------------------------------------------------------------------------------------------------------------------------------------------------------------------------------------------------------------------------------------------------------------------------------------------------------------|-----------------------------------------------------------------------------------------------------------------------------------------------------------------------------------------------------------------------------------------------------------------------------------------------------------------------------------------------------------------------------------------------------------------------------------------------------------------------------------------------------------------------------------------------------------------------------------------------------------------------------------------------------------------------------------------------------------------------------------------------------------------------------------------------------------------------------------------------------------------------------------------------------------------------------------------------------------------------------------------------------------------------------------------------------------------------------------------------------------------------------------------------------|---------------------------------------------------------------------------------------------------------------------------------------------------------------------------------------------------------------------------------------------------------------------------------------------------------------------------------------------------------------------------------------------------------------------------------------------------------------------------------------------------------------------------------------------------------------------------------------------------------------------------------------------------------------------------------------------------------------------------------------------------------------------------------------------------------------------------------------------------------------------------------------------------------------------------------------------------------------------------------------------------------------------------------------------------------------------------------------------------------------------------------------------------|-----------------------------------------------------------------------------------------------------------------------------------------------------------------------------------------------------------------------------------------------------------------------------------------------------------------------------------------------------------------------------------------------------------------------------------------------------------------------------------------------------------------------------------------------------------------------------------------------------------------------------------------------------------------------------------------------------------------------------------------------------------------------------------------------------------------------------------------------------------------------------------------------------------------------------------------------------------------------------------------------------------------------------------------------|
| 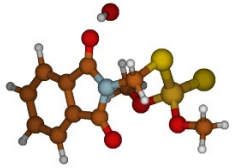                                                                                                                                                                                                                                                                                                                                                                                                                                                                                                                                                                                                                                                                                                                                                                                                                                                                                                                                                                                                                                                                  |                                                                                                                                                                                                                                                                                                                                                                                                                                                                                                                                                                                                                                                                                                                                                                                                                                                                                                                                                                                                                                                                    |                                                                                                                                                                                                                                                                                                                                                                                                                                                                                                                                                                                                                                                                                                                                                                                                                                                                                                                                                                                                                                                                |                                                                                                                                                                                                                                                                                                                                                                                                                                                                                                                                                                                                                                                                                                                                                                                                                                                                                                                                                            |
| C -4.076326 -1.083736 -1.466132<br>C -2.982128 -1.782125 -0.939224<br>C -2.220066 -1.125993 0.010565<br>C -2.526022 0.167017 0.430626<br>C -3.602918 0.867915 -0.082005<br>C -4.380144 0.215251 -1.047005<br>C -0.975996 -1.552895 0.703208<br>N -0.613126 -0.485071 1.546655<br>C -1.486972 0.589476 1.401620<br>C 0.688996 -0.353350 2.143641<br>S 1.766127 0.884749 1.296224<br>P 2.068317 -0.015250 -0.569064<br>O 0.621743 -0.266843 -1.219882<br>C -0.079130 0.815319 -1.868475<br>O -1.351585 1.659280 1.970100<br>O -0.359601 -2.591486 0.609268<br>S 3.335316 1.015604 -1.606938<br>O 2.386930 -1.557432 -0.282427<br>C 3.622731 -1.927218 0.364701<br>H 0.605943 0.014750 3.167431<br>H 1.170012 -1.332390 2.144819<br>H -3.828794 1.878370 0.243238<br>H -2.736735 -2.786505 -1.268536<br>H -5.232465 0.727170 -1.481300<br>H -4.698023 -1.557084 -2.218876<br>H 4.472089 -1.624163 -0.251065<br>H 3.684774 -1.466454 1.354117<br>H 3.592271 -3.010970 0.458339<br>H -1.027005 0.395464 -2.205250<br>H -0.261113 1.627774 -1.156184<br>H 0.499535 1.179978 -2.719045<br>O -0.729547 3.644153 -0.074394<br>H -1.032112 3.093332 0.682680 | C -4.105645 -0.532712 -1.619163<br>C -3.031305 -1.380839 -1.321184<br>C -2.241684 -1.033370 -0.239717<br>C -2.500366 0.104128 0.521554<br>C -3.556487 0.951356 0.236693<br>C -4.363038 0.610616 -0.856112<br>C -1.009429 -1.671569 0.291905<br>N -0.608777 -0.892798 1.394626<br>C -1.440905 0.213971 1.554576<br>C 0.695055 -0.984409 1.994127<br>S 1.826756 0.407674 1.545772<br>P 2.026428 0.146427 -0.517619<br>O 0.527443 0.179201 -1.125625<br>C -0.078687 1.383250 -1.555533<br>O -1.259161 1.093861 2.377000<br>O -0.426424 -2.659483 -0.097687<br>S 3.299702 1.397319 -1.255706<br>O 2.250882 -1.418209 -0.760353<br>C 3.463702 -2.051399 -0.298858<br>H 0.623256 -0.928252 3.081510<br>H 1.141331 -1.936835 1.705106<br>H -3.745495 1.841162 0.828526<br>H -2.822012 -2.263819 -1.916147<br>H -5.201465 1.246705 -1.119825<br>H -4.748569 -0.763593 -2.462109<br>H 4.328221 -1.611127 -0.799991<br>H 3.556269 -1.947154 0.785227<br>H 3.366061 -3.101501 -0.566764<br>H -1.085374 1.140139 -1.895974<br>H -0.182939 2.145617 -0.673153<br>H 0.518001 1.893456 -2.315213<br>O -0.367332 3.199413 0.285980<br>H -0.696129 2.646083 1.025438 | C -4.123926 -1.180809 -1.444401<br>C -2.972740 -1.828071 -0.977776<br>C -2.212926 -1.153815 -0.038932<br>C -2.571851 0.109782 0.426710<br>C -3.707206 0.758849 -0.024705<br>C -4.483883 0.086940 -0.977248<br>C -0.935617 -1.542936 0.613888<br>N -0.595789 -0.478267 1.466378<br>C -1.530663 0.554746 1.388404<br>C 0.686893 -0.329566 2.094392<br>S 1.760477 0.943222 1.293783<br>P 2.188171 0.033293 -0.535542<br>O 0.752800 -0.231112 -1.258000<br>C 0.047312 0.805290 -1.836877<br>O -1.445253 1.599184 2.006893<br>O -0.285560 -2.558122 0.487185<br>S 3.486515 1.051298 -1.536244<br>O 2.474116 -1.508777 -0.238140<br>C 3.689018 -1.895104 0.442396<br>H 0.572262 0.023537 3.120661<br>H 1.190995 -1.296772 2.093602<br>H -3.979528 1.744573 0.338710<br>H -2.686223 -2.810041 -1.339828<br>H -5.381105 0.559458 -1.363030<br>H -4.747880 -1.670259 -2.184878<br>H 4.554575 -1.645554 -0.174188<br>H 3.754069 -1.396694 1.413118<br>H 3.617378 -2.972169 0.578459<br>H -0.900992 0.480431 -2.244233<br>H -0.815613 2.699898 -0.663867<br>H 0.620968 1.616114 -2.274259<br>O -1.267170 3.465968 -0.278534<br>H -1.540748 3.154663 0.597230 | C -4.310639 -1.524412 -0.531659<br>C -3.186862 -1.739175 0.276363<br>C -2.363322 -0.651664 0.506291<br>C -2.633662 0.602523 -0.037904<br>C -3.740856 0.828034 -0.835557<br>C -4.582441 -0.265704 -1.075967<br>C -1.098938 -0.558324 1.281665<br>N -0.678319 0.776453 1.177405<br>C -1.540737 1.524851 0.370300<br>C 0.590471 1.257060 1.645477<br>S 1.804811 1.621763 0.303497<br>P 2.143482 -0.279329 -0.485118<br>O 0.692171 -0.851977 -0.942986<br>C -0.045503 -0.219253 -1.928922<br>O -1.373604 2.696370 0.095900<br>O -0.515668 -1.419108 1.906563<br>S 3.515234 -0.227832 -1.842792<br>O 2.306621 -1.286310 0.743101<br>C 3.504050 -1.242077 1.550515<br>H 0.469577 2.212192 2.159783<br>H 1.008464 0.521002 2.333273<br>H -3.944781 1.805705 -1.259920<br>H -2.969108 -2.714447 0.699407<br>H -5.461448 -0.135376 -1.698567<br>H -4.982494 -2.350120 -0.741348<br>H 4.371410 -1.508708 0.943645<br>H 3.630316 -0.246588 1.983878<br>H 3.352419 -1.977005 2.338323<br>H -0.893879 -0.807506 -2.250078<br>H 0.469280 0.469758 -2.588965 |



**Table S56.** Optimized Cartesian coordinates for the stationary points involved in the H31-abstraction pathway in aqueous phase calculated at the M06-2X/6-31+G(d,p) level of theory.

| MCR(H31-abs)                                                                                                                                                                                                                                                                                                                                                                                                                                                                                                                                                                                                                                                                                                                                                                                                                                                                                                                                                                                                                                                                                                                               | TS(H31-abs)                                                                                                                                                                                                                                                                                                                                                                                                                                                                                                                                                                                                                                                                                                                                                                                                                                                                                                                                                                                                                                                                                                                                     | MCP(H31-abs)                                                                                                                                                                                                                                                                                                                                                                                                                                                                                                                                                                                                                                                                                                                                                                                                                                                                                                                                                                                                                                                                                                                                    | Rad(H31-abs)                                                                                                                                                                                                                                                                                                                                                                                                                                                                                                                                                                                                                                                                                                                                                                                                                                                                                                                                                                                                                                 |
|--------------------------------------------------------------------------------------------------------------------------------------------------------------------------------------------------------------------------------------------------------------------------------------------------------------------------------------------------------------------------------------------------------------------------------------------------------------------------------------------------------------------------------------------------------------------------------------------------------------------------------------------------------------------------------------------------------------------------------------------------------------------------------------------------------------------------------------------------------------------------------------------------------------------------------------------------------------------------------------------------------------------------------------------------------------------------------------------------------------------------------------------|-------------------------------------------------------------------------------------------------------------------------------------------------------------------------------------------------------------------------------------------------------------------------------------------------------------------------------------------------------------------------------------------------------------------------------------------------------------------------------------------------------------------------------------------------------------------------------------------------------------------------------------------------------------------------------------------------------------------------------------------------------------------------------------------------------------------------------------------------------------------------------------------------------------------------------------------------------------------------------------------------------------------------------------------------------------------------------------------------------------------------------------------------|-------------------------------------------------------------------------------------------------------------------------------------------------------------------------------------------------------------------------------------------------------------------------------------------------------------------------------------------------------------------------------------------------------------------------------------------------------------------------------------------------------------------------------------------------------------------------------------------------------------------------------------------------------------------------------------------------------------------------------------------------------------------------------------------------------------------------------------------------------------------------------------------------------------------------------------------------------------------------------------------------------------------------------------------------------------------------------------------------------------------------------------------------|----------------------------------------------------------------------------------------------------------------------------------------------------------------------------------------------------------------------------------------------------------------------------------------------------------------------------------------------------------------------------------------------------------------------------------------------------------------------------------------------------------------------------------------------------------------------------------------------------------------------------------------------------------------------------------------------------------------------------------------------------------------------------------------------------------------------------------------------------------------------------------------------------------------------------------------------------------------------------------------------------------------------------------------------|
| 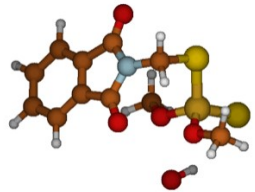                                                                                                                                                                                                                                                                                                                                                                                                                                                                                                                                                                                                                                                                                                                                                                                                                                                                                                                                                                                                                                                          |                                                                                                                                                                                                                                                                                                                                                                                                                                                                                                                                                                                                                                                                                                                                                                                                                                                                                                                                                                                                                                                               |                                                                                                                                                                                                                                                                                                                                                                                                                                                                                                                                                                                                                                                                                                                                                                                                                                                                                                                                                                                                                                                              |                                                                                                                                                                                                                                                                                                                                                                                                                                                                                                                                                                                                                                                                                                                                                                                                                                                                                                                                                           |
| C 4.233760 1.709950 0.323766<br>C 3.128173 1.393335 1.123049<br>C 2.407672 0.264304 0.776482<br>C 2.761721 -0.527376 -0.314224<br>C 3.852732 -0.226416 -1.109964<br>C 4.588926 0.915736 -0.770865<br>C 1.186835 -0.316892 1.394268<br>N 0.873002 -1.456291 0.636660<br>C 1.767804 -1.628041 -0.423847<br>C -0.361535 -2.179305 0.754351<br>S -1.555271 -1.852069 -0.618284<br>P -2.048762 0.144773 -0.256457<br>O -0.681791 0.986270 -0.295560<br>C -0.044112 1.289080 -1.555976<br>O 1.688231 -2.517833 -1.247218<br>O 0.563045 0.059904 2.363518<br>S -3.462932 0.729627 -1.448263<br>O -2.282918 0.290660 1.318459<br>C -3.431972 -0.326704 1.937100<br>H -0.180839 -3.254227 0.702949<br>H -0.820907 -1.930220 1.711884<br>H 4.122055 -0.843999 -1.960548<br>H 2.845949 2.007492 1.971966<br>H 5.450857 1.191687 -1.369358<br>H 4.825423 2.589331 0.555830<br>H -4.349898 0.101953 1.529841<br>H -3.411489 -1.408145 1.778786<br>H -3.348807 -0.102564 2.998669<br>H 0.849701 1.858494 -1.302989<br>H 0.230478 0.362749 -2.070811<br>H -0.710961 1.888216 -2.179807<br>O -1.641767 3.450567 0.094195<br>H -2.288321 3.158164 -0.583422 | C 4.275235 1.234205 1.167297<br>C 3.207982 0.498733 1.697912<br>C 2.454870 -0.244124 0.806401<br>C 2.740644 -0.265775 -0.557513<br>C 3.793051 0.455009 -1.093329<br>C 4.562303 1.212212 -0.200939<br>C 1.257797 -1.092873 1.043025<br>N 0.891114 -1.605190 -0.211656<br>C 1.725656 -1.122586 -1.225251<br>C -0.339295 -2.298612 -0.464366<br>S -1.603454 -1.283725 -1.351999<br>P -2.068325 0.155321 0.085222<br>O -0.697311 0.927791 0.449999<br>C -0.127014 1.878545 -0.433122<br>O 1.587603 -1.382916 -2.403631<br>O 0.684883 -1.339857 2.082856<br>S -3.556732 1.244158 -0.513731<br>O -2.193122 -0.599111 1.485852<br>C -3.304412 -1.489566 1.731562<br>H -0.169497 -3.149442 -1.126376<br>H -0.744417 -2.648414 0.485887<br>H 4.009209 0.437891 -2.156524<br>H 2.978062 0.514946 2.758232<br>H 5.395787 1.795792 -0.577780<br>H 4.890396 1.834840 1.829116<br>H -4.242517 -0.932449 1.693829<br>H -3.308946 -2.299594 0.997625<br>H -3.141501 -1.889818 2.730093<br>H 0.875939 2.103024 -0.069099<br>H -0.134981 1.547078 -1.475620<br>H -0.719160 2.877944 -0.369659<br>O -1.558933 4.043017 -0.253691<br>H -2.404204 3.565391 -0.385934 | C 4.282822 1.443930 1.001072<br>C 3.221660 0.768379 1.617168<br>C 2.478912 -0.087219 0.823604<br>C 2.768010 -0.273414 -0.527083<br>C 3.814185 0.386102 -1.146477<br>C 4.573704 1.255705 -0.353340<br>C 1.292401 -0.915244 1.162743<br>N 0.932615 -1.579034 -0.020783<br>C 1.765347 -1.218960 -1.085170<br>C -0.265308 -2.353811 -0.173813<br>S -1.565814 -1.533873 -1.198987<br>P -2.065701 0.091870 0.002940<br>O -0.698357 0.933462 0.246579<br>C -0.056436 1.583392 -0.791543<br>O 1.636863 -1.629946 -2.220812<br>O 0.721291 -1.041921 2.225052<br>S -3.554717 1.069894 -0.759095<br>O -2.175473 -0.430333 1.505169<br>C -3.273289 -1.286276 1.894459<br>H -0.054518 -3.282888 -0.706679<br>H -0.662003 -2.580437 0.816820<br>H 4.033026 0.239856 -2.199156<br>H 2.989219 0.912671 2.667201<br>H 5.402646 1.796071 -0.798323<br>H 4.890099 2.128035 1.584452<br>H -4.220095 -0.757921 1.767601<br>H -3.262543 -2.204632 1.302100<br>H -3.105077 -1.515239 2.944630<br>H 0.781917 2.180681 -0.464842<br>H -0.197481 1.222571 -1.803425<br>H -1.115545 3.988465 -0.501453<br>O -2.013251 4.149573 -0.178709<br>H -2.474578 3.309418 -0.326186 | C 4.304170 -1.562923 0.418911<br>C 3.177494 -1.717843 -0.398723<br>C 2.356926 -0.614669 -0.550146<br>C 2.633338 0.598598 0.077612<br>C 3.743834 0.765000 0.885272<br>C 4.581963 -0.345574 1.047620<br>C 1.092294 -0.463476 -1.316162<br>N 0.674811 0.861744 -1.116677<br>C 1.543957 1.551192 -0.265518<br>H -0.475660 2.366736 -1.987099<br>S -1.802443 1.642569 -0.171126<br>P -2.143092 -0.314961 0.466317<br>O -0.688285 -0.922478 0.864121<br>C 0.010589 -0.431364 1.951374<br>O 1.381353 2.701438 0.089486<br>O 0.507634 -1.275470 -2.001667<br>S -3.506596 -0.374783 1.831162<br>O -2.312384 -1.216107 -0.840843<br>C -3.508035 -1.097643 -1.642945<br>C -0.595411 1.376608 -1.543610<br>H -1.018184 0.692913 -2.280977<br>H 3.953018 1.710681 1.374569<br>H 2.955242 -2.660804 -0.887578<br>H 5.463072 -0.261487 1.675154<br>H 4.974001 -2.403127 0.569080<br>H -4.379119 -1.401958 -1.059529<br>H -3.624337 -0.070540 -1.998193<br>H -3.362523 -1.770869 -2.485207<br>H 0.851051 -1.046122 2.235645<br>H -0.122489 0.605710 2.234646 |

**Table S57.** Optimized Cartesian coordinates for the stationary points involved in the C1-addition pathway in aqueous phase calculated at the M06-2X/6-31+G(d,p) level of theory.

| MCR(C1-add)                                                                                                                                                                                                                                                                                                                                                                                                                                                                                                                                                                                                                                                                                                                                                                                                                                                                                                                                                                                                                                                                                                                                    | TS(C1-add)                                                                                                                                                                                                                                                                                                                                                                                                                                                                                                                                                                                                                                                                                                                                                                                                                                                                                                                                                                                                                                                                                                                                          | Adduct(C1-add)                                                                                                                                                                                                                                                                                                                                                                                                                                                                                                                                                                                                                                                                                                                                                                                                                                                                                                                                                                                                                                                                                                                                    |
|------------------------------------------------------------------------------------------------------------------------------------------------------------------------------------------------------------------------------------------------------------------------------------------------------------------------------------------------------------------------------------------------------------------------------------------------------------------------------------------------------------------------------------------------------------------------------------------------------------------------------------------------------------------------------------------------------------------------------------------------------------------------------------------------------------------------------------------------------------------------------------------------------------------------------------------------------------------------------------------------------------------------------------------------------------------------------------------------------------------------------------------------|-----------------------------------------------------------------------------------------------------------------------------------------------------------------------------------------------------------------------------------------------------------------------------------------------------------------------------------------------------------------------------------------------------------------------------------------------------------------------------------------------------------------------------------------------------------------------------------------------------------------------------------------------------------------------------------------------------------------------------------------------------------------------------------------------------------------------------------------------------------------------------------------------------------------------------------------------------------------------------------------------------------------------------------------------------------------------------------------------------------------------------------------------------|---------------------------------------------------------------------------------------------------------------------------------------------------------------------------------------------------------------------------------------------------------------------------------------------------------------------------------------------------------------------------------------------------------------------------------------------------------------------------------------------------------------------------------------------------------------------------------------------------------------------------------------------------------------------------------------------------------------------------------------------------------------------------------------------------------------------------------------------------------------------------------------------------------------------------------------------------------------------------------------------------------------------------------------------------------------------------------------------------------------------------------------------------|
| 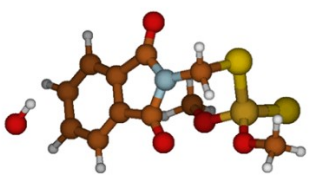                                                                                                                                                                                                                                                                                                                                                                                                                                                                                                                                                                                                                                                                                                                                                                                                                                                                                                                                                                                                                                                              |                                                                                                                                                                                                                                                                                                                                                                                                                                                                                                                                                                                                                                                                                                                                                                                                                                                                                                                                                                                                                                                                   |                                                                                                                                                                                                                                                                                                                                                                                                                                                                                                                                                                                                                                                                                                                                                                                                                                                                                                                                                                                                                                                                |
| C -3.853577 -1.595109 0.109140<br>C -2.836902 -1.176193 0.979500<br>C -2.044912 -0.124645 0.555933<br>C -2.242554 0.495822 -0.676316<br>C -3.249483 0.100548 -1.539335<br>C -4.057810 -0.964879 -1.124493<br>C -0.859326 0.495336 1.202326<br>N -0.395292 1.474396 0.308443<br>C -1.172879 1.513915 -0.853372<br>C 0.896744 2.094304 0.411272<br>S 2.144130 1.416562 -0.772784<br>P 2.374349 -0.543111 -0.070580<br>O 0.924259 -1.231140 -0.108263<br>C 0.375574 -1.696142 -1.360603<br>O -0.952783 2.244794 -1.798237<br>O -0.361810 0.256556 2.281945<br>S 3.802417 -1.437277 -1.023294<br>O 2.469059 -0.445327 1.523652<br>C 3.624536 0.159546 2.140874<br>H 0.834187 3.154309 0.159484<br>H 1.255756 1.981618 1.435117<br>H -3.396621 0.584742 -2.499134<br>H -2.673083 -1.661880 1.935973<br>H -4.855783 -1.314069 -1.771507<br>H -4.489128 -2.428043 0.391798<br>H 4.522022 -0.412237 1.894855<br>H 3.730626 1.197109 1.812014<br>H 3.436758 0.124828 3.212469<br>H -0.604660 -2.106657 -1.118483<br>H 0.270536 -0.861736 -2.061390<br>H 1.016619 -2.471510 -1.784212<br>O -5.741055 -0.090925 1.340662<br>H -5.218008 0.684173 1.042233 | C -4.005806 -1.403563 -0.353043<br>C -2.908494 -1.397387 0.552955<br>C -2.079349 -0.301557 0.520777<br>C -2.267228 0.743117 -0.391564<br>C -3.292598 0.734266 -1.324808<br>C -4.146672 -0.366479 -1.313586<br>C -0.861481 -0.004900 1.319398<br>N -0.383048 1.229370 0.852436<br>C -1.169012 1.725797 -0.190993<br>C 0.911642 1.757855 1.183636<br>S 2.150859 1.597624 -0.175883<br>P 2.374925 -0.481236 -0.295349<br>O 0.920599 -1.095055 -0.586395<br>C 0.359848 -1.033526 -1.915634<br>O -0.941690 2.757259 -0.790567<br>O -0.354851 -0.649916 2.211643<br>S 3.793397 -0.933218 -1.531903<br>O 2.478048 -1.013437 1.210024<br>C 3.641362 -0.704748 2.005829<br>H 0.848891 2.831480 1.368677<br>H 1.273086 1.252301 2.080095<br>H -3.411030 1.538029 -2.043534<br>H -2.755161 -2.216403 1.247564<br>H -4.956582 -0.432456 -2.031968<br>H -4.572443 -2.317315 -0.485502<br>H 4.531360 -1.146845 1.553296<br>H 3.759258 0.377948 2.101232<br>H 3.454845 -1.147454 2.982341<br>H -0.624143 -1.496022 -1.841317<br>H 0.261693 0.008007 -2.238158<br>H 0.988636 -1.590701 -2.612553<br>O -5.458188 -0.782630 0.954179<br>H -5.093686 0.098861 1.158714 | C 4.209319 -1.143392 0.500494<br>C 3.006843 -1.350521 -0.380022<br>C 2.108324 -0.355496 -0.511225<br>C 2.246665 0.908934 0.136963<br>C 3.347600 1.195349 0.966350<br>C 4.284937 0.218303 1.143076<br>C 0.853174 -0.315155 -1.310319<br>N 0.333951 0.969747 -1.138268<br>C 1.117633 1.745325 -0.261557<br>C -0.967668 1.371634 -1.591163<br>S -2.208425 1.556627 -0.236493<br>P -2.387126 -0.416587 0.435764<br>O -0.919165 -0.898677 0.869718<br>C -0.353015 -0.454141 2.121007<br>O 0.839873 2.892398 0.053758<br>O 0.353934 -1.182958 -1.998895<br>S -3.793610 -0.547302 1.759346<br>O -2.480239 -1.338015 -0.869322<br>C -3.645643 -1.271269 -1.717187<br>H -0.923277 2.360405 -2.051300<br>H -1.320716 0.642581 -2.321760<br>H 3.447198 2.167915 1.437564<br>H 2.902638 -2.302410 -0.893361<br>H 5.157639 0.395437 1.764295<br>H 4.179154 -1.897918 1.300525<br>H -4.534929 -1.563695 -1.154928<br>H -3.763295 -0.261759 -2.120030<br>H -3.461638 -1.976601 -2.525259<br>H 0.651053 -0.875819 2.155562<br>H -0.301763 0.638932 2.149261<br>H -0.950098 -0.828424 2.954732<br>O 5.414591 -1.434102 -0.214117<br>H 5.498880 -0.793856 -0.937213 |

**Table S58.** Optimized Cartesian coordinates for the stationary points involved in the C2-addition pathway in aqueous phase calculated at the M06-2X/6-31+G(d,p) level of theory.

| MCR(C2-add)                                                                                                                                                                                                                                                                                                                                                                                                                                                                                                                                                                                                                                                                                                                                                                                                                                                                                                                                                                                                                                                                                                                                    | TS(C2-add)                                                                                                                                                                                                                                                                                                                                                                                                                                                                                                                                                                                                                                                                                                                                                                                                                                                                                                                                                                                                                                                                                                                                         | Adduct(C2-add)                                                                                                                                                                                                                                                                                                                                                                                                                                                                                                                                                                                                                                                                                                                                                                                                                                                                                                                                                                                                                                                                                                                                 |
|------------------------------------------------------------------------------------------------------------------------------------------------------------------------------------------------------------------------------------------------------------------------------------------------------------------------------------------------------------------------------------------------------------------------------------------------------------------------------------------------------------------------------------------------------------------------------------------------------------------------------------------------------------------------------------------------------------------------------------------------------------------------------------------------------------------------------------------------------------------------------------------------------------------------------------------------------------------------------------------------------------------------------------------------------------------------------------------------------------------------------------------------|----------------------------------------------------------------------------------------------------------------------------------------------------------------------------------------------------------------------------------------------------------------------------------------------------------------------------------------------------------------------------------------------------------------------------------------------------------------------------------------------------------------------------------------------------------------------------------------------------------------------------------------------------------------------------------------------------------------------------------------------------------------------------------------------------------------------------------------------------------------------------------------------------------------------------------------------------------------------------------------------------------------------------------------------------------------------------------------------------------------------------------------------------|------------------------------------------------------------------------------------------------------------------------------------------------------------------------------------------------------------------------------------------------------------------------------------------------------------------------------------------------------------------------------------------------------------------------------------------------------------------------------------------------------------------------------------------------------------------------------------------------------------------------------------------------------------------------------------------------------------------------------------------------------------------------------------------------------------------------------------------------------------------------------------------------------------------------------------------------------------------------------------------------------------------------------------------------------------------------------------------------------------------------------------------------|
| 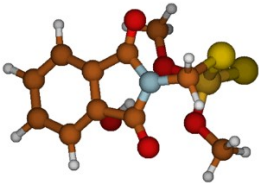                                                                                                                                                                                                                                                                                                                                                                                                                                                                                                                                                                                                                                                                                                                                                                                                                                                                                                                                                                                                                                                              |                                                                                                                                                                                                                                                                                                                                                                                                                                                                                                                                                                                                                                                                                                                                                                                                                                                                                                                                                                                                                                                                  |                                                                                                                                                                                                                                                                                                                                                                                                                                                                                                                                                                                                                                                                                                                                                                                                                                                                                                                                                                                                                                                             |
| C -4.160838 -0.506174 1.045123<br>C -3.179461 0.440899 1.367485<br>C -2.214820 0.695915 0.407134<br>C -2.214071 0.042304 -0.823487<br>C -3.175553 -0.896346 -1.151833<br>C -4.158437 -1.161617 -0.189253<br>C -1.050515 1.620573 0.442755<br>N -0.406079 1.478587 -0.795870<br>C -1.048070 0.533980 -1.603159<br>C 0.855168 2.083272 -1.110681<br>S 2.278941 0.904919 -1.299832<br>P 1.941921 -0.484638 0.222744<br>O 0.562663 -1.238994 -0.137667<br>C 0.545910 -2.292525 -1.126783<br>O -0.677257 0.221480 -2.716292<br>O -0.701950 2.379519 1.322262<br>S 3.499379 -1.599822 0.484037<br>O 1.340855 0.320208 1.465796<br>C 2.156873 1.264188 2.190986<br>H 0.810245 2.593825 -2.074363<br>H 1.087852 2.799770 -0.323057<br>H -3.167173 -1.404436 -2.110731<br>H -3.173459 0.949794 2.325930<br>H -4.931879 -1.891565 -0.403868<br>H -4.934944 -0.738615 1.768882<br>H 3.044772 0.764558 2.584097<br>H 2.441385 2.096193 1.541624<br>H 1.534313 1.624192 3.007765<br>H -0.507435 -2.516313 -1.296180<br>H 1.009726 -1.947035 -2.054080<br>H 1.065358 -3.169304 -0.737416<br>O -1.333957 -1.753592 1.953493<br>H -0.678111 -1.498959 1.263590 | C -4.297471 -1.136701 0.140429<br>C -3.132031 -1.129980 0.955974<br>C -2.239785 -0.063235 0.740718<br>C -2.431102 0.857351 -0.270424<br>C -3.541761 0.811717 -1.108007<br>C -4.476235 -0.207490 -0.880943<br>C -0.962212 0.249947 1.427147<br>N -0.462196 1.405645 0.807001<br>C -1.284954 1.811171 -0.245650<br>C 0.853054 1.934541 1.042789<br>S 2.051491 1.635719 -0.330074<br>P 2.180996 -0.453944 -0.322167<br>O 0.691408 -1.003589 -0.559713<br>C 0.115150 -0.934786 -1.883197<br>O -1.059931 2.759632 -0.968882<br>O -0.430437 -0.330681 2.348986<br>S 3.555572 -1.048828 -1.548159<br>O 2.284681 -0.901867 1.209660<br>C 3.475771 -0.604632 1.968246<br>H 0.814860 3.021386 1.135036<br>H 1.235158 1.502216 1.968570<br>H -3.680925 1.542115 -1.898186<br>H -3.087181 -1.715087 1.867372<br>H -5.363639 -0.264858 -1.501741<br>H -5.046199 -1.903966 0.307676<br>H 4.332533 -1.126688 1.537490<br>H 3.655314 0.473690 1.985521<br>H 3.280177 -0.966578 2.975746<br>H -0.905939 -1.297267 -1.778039<br>H 0.115119 0.098388 -2.245138<br>H 0.676985 -1.574604 -2.566510<br>O -2.099625 -2.581188 -0.023241<br>H -2.778310 -3.275363 0.070483 | C 4.024526 0.312329 -1.112769<br>C 3.131040 1.222662 -0.309413<br>C 2.115397 0.424012 0.430785<br>C 2.026610 -0.947683 0.360479<br>C 2.891484 -1.727088 -0.400243<br>C 3.903335 -1.042844 -1.145825<br>C 1.036530 0.922426 1.288282<br>N 0.299508 -0.213317 1.697834<br>C 0.845472 -1.376574 1.166813<br>C -0.971831 -0.139484 2.349047<br>S -2.443239 -0.584195 1.293806<br>P -1.919272 0.066384 -0.625039<br>O -0.647927 -0.793713 -1.093773<br>C -0.819011 -2.156266 -1.536181<br>O 0.407753 -2.495513 1.348419<br>O 0.788716 2.060209 1.642613<br>S -3.473605 0.031490 -1.778780<br>O -1.117360 1.440848 -0.458626<br>C -1.789275 2.619148 0.032632<br>H -1.023176 -0.845806 3.179600<br>H -1.102426 0.877452 2.717976<br>H 2.790526 -2.805776 -0.441963<br>H 3.745629 1.800636 0.395167<br>H 4.579669 -1.626211 -1.761812<br>H 4.790864 0.807315 -1.702277<br>H -2.642809 2.856205 -0.606426<br>H -2.114668 2.465101 1.064839<br>H -1.052335 3.418832 -0.011425<br>H 0.188542 -2.555584 -1.651639<br>H -1.366384 -2.735295 -0.787608<br>H -1.345016 -2.170268 -2.492246<br>O 2.519673 2.216287 -1.140886<br>H 1.941165 1.765365 -1.775507 |

**Table S59.** Optimized Cartesian coordinates for the stationary points involved in the C3-addition pathway in aqueous phase calculated at the M06-2X/6-31+G(d,p) level of theory.

| MCR(C3-add)                                                                                                                                                                                                                                                                                                                                                                                                                                                                                                                                                                                                                                                                                                                                                                                                                                                                                                                                                                                                                                                                                                                                           | TS(C3-add)                                                                                                                                                                                                                                                                                                                                                                                                                                                                                                                                                                                                                                                                                                                                                                                                                                                                                                                                                                                                                                                                                                                                        | Adduct(C3-add)                                                                                                                                                                                                                                                                                                                                                                                                                                                                                                                                                                                                                                                                                                                                                                                                                                                                                                                                                                                                                                                                                                                                     |
|-------------------------------------------------------------------------------------------------------------------------------------------------------------------------------------------------------------------------------------------------------------------------------------------------------------------------------------------------------------------------------------------------------------------------------------------------------------------------------------------------------------------------------------------------------------------------------------------------------------------------------------------------------------------------------------------------------------------------------------------------------------------------------------------------------------------------------------------------------------------------------------------------------------------------------------------------------------------------------------------------------------------------------------------------------------------------------------------------------------------------------------------------------|---------------------------------------------------------------------------------------------------------------------------------------------------------------------------------------------------------------------------------------------------------------------------------------------------------------------------------------------------------------------------------------------------------------------------------------------------------------------------------------------------------------------------------------------------------------------------------------------------------------------------------------------------------------------------------------------------------------------------------------------------------------------------------------------------------------------------------------------------------------------------------------------------------------------------------------------------------------------------------------------------------------------------------------------------------------------------------------------------------------------------------------------------|----------------------------------------------------------------------------------------------------------------------------------------------------------------------------------------------------------------------------------------------------------------------------------------------------------------------------------------------------------------------------------------------------------------------------------------------------------------------------------------------------------------------------------------------------------------------------------------------------------------------------------------------------------------------------------------------------------------------------------------------------------------------------------------------------------------------------------------------------------------------------------------------------------------------------------------------------------------------------------------------------------------------------------------------------------------------------------------------------------------------------------------------------|
| 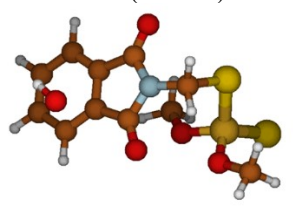                                                                                                                                                                                                                                                                                                                                                                                                                                                                                                                                                                                                                                                                                                                                                                                                                                                                                                                                                                                                                                                                     |                                                                                                                                                                                                                                                                                                                                                                                                                                                                                                                                                                                                                                                                                                                                                                                                                                                                                                                                                                                                                                                                 |                                                                                                                                                                                                                                                                                                                                                                                                                                                                                                                                                                                                                                                                                                                                                                                                                                                                                                                                                                                                                                                                 |
| C -4.021128 1.211517 -1.377519<br>C -2.968969 0.337985 -1.681049<br>C -2.175004 -0.077074 -0.625003<br>C -2.408228 0.347974 0.682689<br>C -3.446053 1.206561 0.994432<br>C -4.255303 1.635833 -0.066372<br>C -1.005302 -0.995364 -0.612442<br>N -0.593490 -1.079717 0.726005<br>C -1.379661 -0.276499 1.556791<br>C 0.636593 -1.687962 1.149250<br>S 1.955007 -0.474662 1.596148<br>P 2.360394 0.406140 -0.259127<br>O 0.979755 1.018295 -0.801799<br>C 0.466744 2.249929 -0.250342<br>O -1.201663 -0.149567 2.751919<br>O -0.490718 -1.592814 -1.533550<br>S 3.869249 1.610353 -0.115873<br>O 2.438872 -0.787471 -1.322426<br>C 3.536234 -1.723079 -1.271948<br>H 0.479735 -2.266120 2.061546<br>H 0.989799 -2.346855 0.355014<br>H -3.625459 1.533114 2.013534<br>H -2.784172 -0.000375 -2.695469<br>H -5.080396 2.311600 0.133051<br>H -4.667568 1.564996 -2.173899<br>H 4.478724 -1.203437 -1.456595<br>H 3.561414 -2.225861 -0.301564<br>H 3.342650 -2.445839 -2.062057<br>H -0.461071 2.448433 -0.785840<br>H 0.265195 2.130297 0.819071<br>H 1.179758 3.059901 -0.415370<br>O -3.676221 -2.345456 -0.496983<br>H -4.397918 -1.787814 -0.139158 | C -3.788341 1.452239 -1.245791<br>C -2.873415 0.481323 -1.642388<br>C -2.230941 -0.254314 -0.628115<br>C -2.389290 0.110243 0.729481<br>C -3.288860 1.071451 1.124585<br>C -4.007394 1.732368 0.109990<br>C -0.997716 -1.098471 -0.722384<br>N -0.574528 -1.311296 0.594269<br>C -1.364744 -0.618306 1.517299<br>C 0.693900 -1.899480 0.931903<br>S 1.942117 -0.673193 1.519130<br>P 2.237842 0.489135 -0.198611<br>O 0.806745 1.078967 -0.623976<br>C 0.249915 2.213165 0.076027<br>O -1.173547 -0.620359 2.716744<br>O -0.462623 -1.547009 -1.709981<br>S 3.669710 1.758073 0.093094<br>O 2.364060 -0.532608 -1.423385<br>C 3.518383 -1.392229 -1.527686<br>H 0.582812 -2.596307 1.764307<br>H 1.072796 -2.429114 0.056959<br>H -3.412219 1.338507 2.168927<br>H -2.682668 0.262267 -2.687628<br>H -4.723095 2.500662 0.382432<br>H -4.332244 2.013151 -1.997957<br>H 4.421897 -0.791046 -1.647918<br>H 3.598107 -2.028818 -0.642561<br>H 3.350401 -2.002788 -2.412681<br>H -0.726900 2.386007 -0.376994<br>H 0.135845 1.984577 1.140612<br>H 0.890425 3.086436 -0.060071<br>O -3.342373 -1.936384 -0.780169<br>H -4.177399 -1.568363 -0.435077 | C -3.423703 1.721408 -1.133311<br>C -2.703695 0.666400 -1.609126<br>C -2.406651 -0.479203 -0.696955<br>C -2.464783 -0.102032 0.749564<br>C -3.176190 0.972125 1.204378<br>C -3.734384 1.856033 0.253852<br>C -1.028508 -1.145729 -0.807590<br>N -0.595944 -1.416284 0.481642<br>C -1.429580 -0.847468 1.465623<br>C 0.688104 -1.991091 0.783894<br>S 1.904362 -0.785491 1.469559<br>P 2.178538 0.510998 -0.151537<br>O 0.735115 1.110645 -0.518083<br>C 0.159856 2.143485 0.312258<br>O -1.210160 -0.947270 2.660308<br>O -0.459352 -1.468895 -1.826219<br>S 3.593744 1.772425 0.238433<br>O 2.316921 -0.404897 -1.455210<br>C 3.485977 -1.232366 -1.631283<br>H 0.587198 -2.748930 1.562825<br>H 1.084963 -2.446791 -0.123987<br>H -3.228119 1.197907 2.265661<br>H -2.456827 0.559234 -2.661071<br>H -4.318286 2.705433 0.588518<br>H -3.754588 2.498673 -1.814671<br>H 4.377307 -0.606706 -1.710956<br>H 3.583905 -1.932403 -0.797301<br>H 3.322697 -1.777361 -2.558976<br>H -0.810279 2.369200 -0.128850<br>H 0.032331 1.780239 1.336942<br>H 0.796729 3.030179 0.298937<br>O -3.293615 -1.574697 -1.004809<br>H -4.203126 -1.259075 -0.879127 |

**Table S60.** Optimized Cartesian coordinates for the stationary points involved in the C4-addition pathway in aqueous phase calculated at the M06-2X/6-31+G(d,p) level of theory.

| MCR(C4-add)                                                                                                                                                                                                                                                                                                                                                                                                                                                                                                                                                                                                                                                                                                                                                                                                                                                                                                                                                                                                                                                                                                                                    | TS(C4-add)                                                                                                                                                                                                                                                                                                                                                                                                                                                                                                                                                                                                                                                                                                                                                                                                                                                                                                                                                                                                                                                                                                                                     | Adduct(C4-add)                                                                                                                                                                                                                                                                                                                                                                                                                                                                                                                                                                                                                                                                                                                                                                                                                                                                                                                                                                                                                                                                                                                             |
|------------------------------------------------------------------------------------------------------------------------------------------------------------------------------------------------------------------------------------------------------------------------------------------------------------------------------------------------------------------------------------------------------------------------------------------------------------------------------------------------------------------------------------------------------------------------------------------------------------------------------------------------------------------------------------------------------------------------------------------------------------------------------------------------------------------------------------------------------------------------------------------------------------------------------------------------------------------------------------------------------------------------------------------------------------------------------------------------------------------------------------------------|------------------------------------------------------------------------------------------------------------------------------------------------------------------------------------------------------------------------------------------------------------------------------------------------------------------------------------------------------------------------------------------------------------------------------------------------------------------------------------------------------------------------------------------------------------------------------------------------------------------------------------------------------------------------------------------------------------------------------------------------------------------------------------------------------------------------------------------------------------------------------------------------------------------------------------------------------------------------------------------------------------------------------------------------------------------------------------------------------------------------------------------------|--------------------------------------------------------------------------------------------------------------------------------------------------------------------------------------------------------------------------------------------------------------------------------------------------------------------------------------------------------------------------------------------------------------------------------------------------------------------------------------------------------------------------------------------------------------------------------------------------------------------------------------------------------------------------------------------------------------------------------------------------------------------------------------------------------------------------------------------------------------------------------------------------------------------------------------------------------------------------------------------------------------------------------------------------------------------------------------------------------------------------------------------|
| 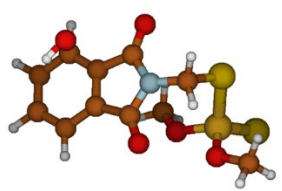                                                                                                                                                                                                                                                                                                                                                                                                                                                                                                                                                                                                                                                                                                                                                                                                                                                                                                                                                                                                                                                              |                                                                                                                                                                                                                                                                                                                                                                                                                                                                                                                                                                                                                                                                                                                                                                                                                                                                                                                                                                                                                                                              |                                                                                                                                                                                                                                                                                                                                                                                                                                                                                                                                                                                                                                                                                                                                                                                                                                                                                                                                                                                                                                                         |
| C -3.952561 -1.953971 0.640651<br>C -2.862776 -1.447839 1.362324<br>C -2.122992 -0.447109 0.760046<br>C -2.445010 0.043791 -0.505007<br>C -3.520192 -0.446662 -1.226990<br>C -4.274294 -1.464335 -0.628296<br>C -0.931623 0.293258 1.253380<br>N -0.606071 1.217751 0.249844<br>C -1.464935 1.109622 -0.847257<br>C 0.600168 1.997132 0.236900<br>S 1.865954 1.397294 -0.965524<br>P 2.413448 -0.431541 -0.107656<br>O 1.075080 -1.308057 0.014809<br>C 0.503798 -1.920317 -1.160839<br>O -1.375330 1.780848 -1.855579<br>O -0.340713 0.179644 2.306459<br>S 3.900828 -1.210386 -1.070836<br>O 2.579489 -0.166042 1.461970<br>C 3.688458 0.622122 1.943142<br>H 0.387189 3.019321 -0.080156<br>H 1.018484 2.006391 1.244334<br>H -3.767391 -0.057281 -2.209310<br>H -2.610513 -1.824677 2.348137<br>H -5.125290 -1.879577 -1.157864<br>H -4.558934 -2.742065 1.074741<br>H 4.629936 0.116882 1.718271<br>H 3.671529 1.617194 1.490565<br>H 3.548480 0.699560 3.019562<br>H -0.388496 -2.442256 -0.817012<br>H 0.231278 -1.152609 -1.892040<br>H 1.211882 -2.627741 -1.596769<br>O -4.095615 2.073765 0.257429<br>H -4.527429 1.429754 0.856202 | C -3.720647 -1.988704 0.724760<br>C -2.718394 -1.332888 1.465347<br>C -2.107000 -0.254668 0.872265<br>C -2.501662 0.226544 -0.398363<br>C -3.427374 -0.496610 -1.175474<br>C -4.052943 -1.585777 -0.575808<br>C -0.921112 0.521834 1.308162<br>N -0.586537 1.360907 0.233645<br>C -1.453656 1.199809 -0.845486<br>C 0.652729 2.085926 0.150186<br>S 1.866195 1.349893 -1.029300<br>P 2.290881 -0.485682 -0.114041<br>O 0.894994 -1.260530 0.052910<br>C 0.282880 -1.904563 -1.085686<br>O -1.340145 1.759115 -1.914310<br>O -0.319315 0.474080 2.359738<br>S 3.705050 -1.398665 -1.068570<br>O 2.495388 -0.182406 1.443642<br>C 3.651753 0.558660 1.886340<br>H 0.479510 3.093847 -0.230858<br>H 1.087477 2.141042 1.149083<br>H -3.664186 -0.181562 -2.186154<br>H -2.416386 -1.688608 2.444843<br>H -4.801787 -2.142653 -1.128349<br>H -4.223666 -2.846673 1.157872<br>H 4.561918 0.000611 1.657334<br>H 3.676805 1.542351 1.410098<br>H 3.536055 0.667908 2.962901<br>H -0.661171 -2.310839 -0.721962<br>H 0.096675 -1.174829 -1.880353<br>H 0.925524 -2.708186 -1.449768<br>O -3.700399 1.791857 0.045598<br>H -4.345769 1.312511 0.598247 | C 3.426643 2.094139 0.754897<br>C 2.567398 1.277563 1.524569<br>C 2.158552 0.087415 0.993540<br>C 2.716914 -0.469362 -0.278359<br>C 3.315943 0.581433 -1.155780<br>C 3.722784 1.757825 -0.600849<br>C 0.953414 -0.662552 1.345483<br>N 0.617269 -1.423901 0.201973<br>C 1.529443 -1.275709 -0.825445<br>C -0.644808 -2.098396 0.044255<br>S -1.787892 -1.270210 -1.140431<br>P -2.249814 0.491346 -0.106576<br>O -0.860344 1.236608 0.188664<br>C -0.167073 1.923233 -0.875179<br>O 1.419813 -1.762652 -1.930767<br>O 0.287896 -0.649605 2.363693<br>S -3.611098 1.486998 -1.055633<br>O -2.534587 0.067886 1.409810<br>C -3.724654 -0.680532 1.735971<br>H -0.489423 -3.094207 -0.375134<br>H -1.116320 -2.180905 1.024320<br>H 3.533338 0.321965 -2.187474<br>H 2.163426 1.634401 2.467727<br>H 4.269991 2.475801 -1.203367<br>H 3.779974 3.035007 1.160032<br>H -4.612530 -0.087477 1.507508<br>H -3.742812 -1.623481 1.183058<br>H -3.665120 -0.875649 2.804871<br>H 0.707340 2.379428 -0.412634<br>H 0.143044 1.211157 -1.647029<br>H -0.810226 2.693005 -1.306789<br>C 3.693492 -1.502988 -0.036085<br>H 4.472022 -1.084886 0.365540 |

**Table S61.** Optimized Cartesian coordinates for the stationary points involved in the C5-addition pathway in aqueous phase calculated at the M06-2X/6-31+G(d,p) level of theory.

| 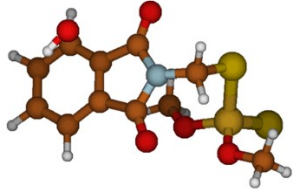 <p>MCR(C5-add)</p> |  <p>TS(C5-add)</p> |  <p>Adduct(C5-add)</p> |
|------------------------------------------------------------------------------------------------------|------------------------------------------------------------------------------------------------------|-----------------------------------------------------------------------------------------------------------|
| C -3.955117 -1.955920 0.633943                                                                       | C -3.847161 -1.995374 0.360708                                                                       | C -3.868580 -2.045100 0.107388                                                                            |
| C -2.863979 -1.454484 1.356885                                                                       | C -2.751686 -1.646680 1.166941                                                                       | C -2.698067 -1.864738 0.909324                                                                            |
| C -2.123742 -0.451604 0.758738                                                                       | C -2.034205 -0.512066 0.811363                                                                       | C -2.018185 -0.657704 0.780511                                                                            |
| C -2.446613 0.045717 -0.503580                                                                       | C -2.378988 0.256195 -0.287551                                                                       | C -2.419312 0.343324 -0.074311                                                                            |
| C -3.523223 -0.439895 -1.226707                                                                      | C -3.510615 -0.029502 -1.069198                                                                      | C -3.657755 0.272449 -0.899105                                                                            |
| C -4.277754 -1.459736 -0.632201                                                                      | C -4.205339 -1.227219 -0.741530                                                                      | C -4.314132 -1.075285 -0.737662                                                                           |
| C -0.931259 0.285383 1.254479                                                                        | C -0.814838 0.080945 1.425298                                                                        | C -0.764223 -0.216026 1.460388                                                                            |
| N -0.606032 1.214511 0.255017                                                                        | N -0.507799 1.215316 0.658518                                                                        | N -0.484272 1.055111 0.957343                                                                             |
| C -1.466137 1.112480 -0.841624                                                                       | C -1.400959 1.368101 -0.405350                                                                       | C -1.439253 1.433617 -0.005286                                                                            |
| C 0.599918 1.994355 0.244924                                                                         | C 0.729466 1.938372 0.762748                                                                         | C 0.760773 1.740055 1.151831                                                                              |
| S 1.865326 1.400359 -0.960763                                                                        | S 1.912287 1.599420 -0.613969                                                                        | S 1.893378 1.684281 -0.308286                                                                             |
| P 2.415280 -0.430805 -0.109502                                                                       | P 2.389117 -0.409850 -0.268239                                                                       | P 2.378356 -0.350149 -0.383424                                                                            |
| O 1.077877 -1.308998 0.010910                                                                        | O 1.010069 -1.230657 -0.301548                                                                       | O 0.997246 -1.153316 -0.540289                                                                            |
| C 0.504995 -1.916039 -1.166629                                                                       | C 0.381571 -1.536595 -1.565096                                                                       | C 0.310739 -1.169191 -1.810054                                                                            |
| O -1.377258 1.788722 -1.846672                                                                       | O -1.338299 2.250541 -1.237252                                                                       | O -1.391263 2.478856 -0.631539                                                                            |
| O -0.339482 0.166421 2.306454                                                                        | O -0.190951 -0.287946 2.396363                                                                       | O -0.109945 -0.799471 2.299377                                                                            |
| S 3.902836 -1.205018 -1.076145                                                                       | S 3.793843 -0.983969 -1.469421                                                                       | S 3.748288 -0.672361 -1.712874                                                                            |
| O 2.581924 -0.170186 1.460877                                                                        | O 2.627832 -0.555744 1.307432                                                                        | O 2.664090 -0.808058 1.123249                                                                             |
| C 3.690045 0.618033 1.943919                                                                         | C 3.779978 0.059289 1.921285                                                                         | C 3.838980 -0.330031 1.811137                                                                             |
| H 0.386210 3.017764 -0.067653                                                                        | H 0.547759 3.012870 0.706292                                                                         | H 0.587852 2.804965 1.315528                                                                              |
| H 1.018771 1.999519 1.252161                                                                         | H 1.192319 1.695494 1.720171                                                                         | H 1.260120 1.312848 2.022542                                                                              |
| H -3.771118 -0.045333 -2.206790                                                                      | H -3.668749 0.462578 -2.021633                                                                       | H -3.415570 0.438127 -1.957270                                                                            |
| H -2.611150 -1.836378 2.340607                                                                       | H -2.468414 -2.245849 2.026091                                                                       | H -2.353850 -2.636394 1.588557                                                                            |
| H -5.129813 -1.871421 -1.162839                                                                      | H -5.050027 -1.523378 -1.354149                                                                      | H -5.213924 -1.233682 -1.325290                                                                           |
| H -4.561812 -2.745494 1.064888                                                                       | H -4.417870 -2.887248 0.595413                                                                       | H -4.413581 -2.980158 0.185001                                                                            |
| H 4.632173 0.115309 1.716159                                                                         | H 4.695671 -0.377173 1.517190                                                                        | H 4.738520 -0.689720 1.307441                                                                             |
| H 3.670872 1.614795 1.495153                                                                         | H 3.766380 1.139741 1.755081                                                                         | H 3.836061 0.762459 1.852790                                                                              |
| H 3.551042 0.691112 3.020765                                                                         | H 3.696108 -0.156124 2.984684                                                                        | H 3.778592 -0.742198 2.816513                                                                             |
| H -0.386105 -2.440585 -0.823693                                                                      | H -0.530832 -2.078012 -1.316592                                                                      | H -0.585478 -1.768645 -1.653069                                                                           |
| H 0.230328 -1.145014 -1.893509                                                                       | H 0.137115 -0.612642 -2.099336                                                                       | H 0.035216 -0.150894 -2.103274                                                                            |
| H 1.212948 -2.620606 -1.607403                                                                       | H 1.040951 -2.163159 -2.168620                                                                       | H 0.943934 -1.627550 -2.572300                                                                            |
| O -4.097184 2.074331 0.259727                                                                        | O -4.785219 1.327020 -0.233460                                                                       | O -4.573145 1.327976 -0.576650                                                                            |
| H -4.529722 1.429325 0.856852                                                                        | H -4.791430 0.967724 0.673646                                                                        | H -4.831750 1.230447 0.353190                                                                             |

**Table S62.** Optimized Cartesian coordinates for the stationary points involved in the C6-addition pathway in aqueous phase calculated at the M06-2X/6-31+G(d,p) level of theory.

| MCR(C6-add)                                                                                                                                                                                                                                                                                                                                                                                                                                                                                                                                                                                                                                                                                                                                                                                                                                                                                                                                                                                                                                                                                                                                    | TS(C6-add)                                                                                                                                                                                                                                                                                                                                                                                                                                                                                                                                                                                                                                                                                                                                                                                                                                                                                                                                                                                                                                                                                                                                    | Adduct(C6-add)                                                                                                                                                                                                                                                                                                                                                                                                                                                                                                                                                                                                                                                                                                                                                                                                                                                                                                                                                                                                                                                                                                                                |
|------------------------------------------------------------------------------------------------------------------------------------------------------------------------------------------------------------------------------------------------------------------------------------------------------------------------------------------------------------------------------------------------------------------------------------------------------------------------------------------------------------------------------------------------------------------------------------------------------------------------------------------------------------------------------------------------------------------------------------------------------------------------------------------------------------------------------------------------------------------------------------------------------------------------------------------------------------------------------------------------------------------------------------------------------------------------------------------------------------------------------------------------|-----------------------------------------------------------------------------------------------------------------------------------------------------------------------------------------------------------------------------------------------------------------------------------------------------------------------------------------------------------------------------------------------------------------------------------------------------------------------------------------------------------------------------------------------------------------------------------------------------------------------------------------------------------------------------------------------------------------------------------------------------------------------------------------------------------------------------------------------------------------------------------------------------------------------------------------------------------------------------------------------------------------------------------------------------------------------------------------------------------------------------------------------|-----------------------------------------------------------------------------------------------------------------------------------------------------------------------------------------------------------------------------------------------------------------------------------------------------------------------------------------------------------------------------------------------------------------------------------------------------------------------------------------------------------------------------------------------------------------------------------------------------------------------------------------------------------------------------------------------------------------------------------------------------------------------------------------------------------------------------------------------------------------------------------------------------------------------------------------------------------------------------------------------------------------------------------------------------------------------------------------------------------------------------------------------|
|                                                                                                                                                                                                                                                                                                                                                                                                                                                                                                                                                                                                                                                                                                                                                                                                                                                                                                                                                                                                                                                               |                                                                                                                                                                                                                                                                                                                                                                                                                                                                                                                                                                                                                                                                                                                                                                                                                                                                                                                                                                                                                                                             |                                                                                                                                                                                                                                                                                                                                                                                                                                                                                                                                                                                                                                                                                                                                                                                                                                                                                                                                                                                                                                                            |
| C 4.280759 0.341789 1.359774<br>C 3.042295 -0.133573 1.807535<br>C 2.171353 -0.616385 0.846591<br>C 2.503562 -0.629287 -0.506954<br>C 3.726263 -0.169377 -0.962575<br>C 4.618796 0.321546 0.001593<br>C 0.809773 -1.199291 0.995009<br>N 0.390645 -1.535877 -0.299737<br>C 1.351380 -1.197397 -1.256300<br>C -0.928693 -1.995392 -0.631557<br>S -1.972561 -0.728842 -1.472235<br>P -2.349877 0.588434 0.109222<br>O -0.924526 1.060304 0.671359<br>C -0.114443 1.995148 -0.069096<br>O 1.211791 -1.361535 -2.451914<br>O 0.165330 -1.395279 2.003625<br>S -3.595107 1.965586 -0.437842<br>O -2.725598 -0.316903 1.375253<br>C -3.975202 -1.037904 1.399571<br>H -0.871645 -2.819698 -1.344720<br>H -1.418548 -2.336240 0.281895<br>H 3.982053 -0.183941 -2.017021<br>H 2.777033 -0.124180 2.859598<br>H 5.591258 0.688882 -0.309693<br>H 4.994199 0.733292 2.077340<br>H -4.812150 -0.337450 1.366821<br>H -4.026603 -1.734506 0.558469<br>H -3.979292 -1.586994 2.339037<br>H 0.739145 2.209834 0.572715<br>H 0.219595 1.544489 -1.009341<br>H -0.676657 2.910761 -0.264710<br>O 3.693082 2.845209 -0.530894<br>H 2.802223 2.438779 -0.530241 | C 4.173948 0.522787 1.306511<br>C 2.962734 0.039115 1.796182<br>C 2.102274 -0.544131 0.878589<br>C 2.425835 -0.661761 -0.478164<br>C 3.617439 -0.199388 -0.984528<br>C 4.491623 0.461198 -0.076788<br>C 0.758282 -1.148145 1.085625<br>N 0.341274 -1.603821 -0.172859<br>C 1.286446 -1.326452 -1.164185<br>C -0.986058 -2.072889 -0.459293<br>S -2.015898 -0.859565 -1.392708<br>P -2.298156 0.630825 0.050200<br>O -0.843394 1.116578 0.518887<br>C -0.051971 1.986782 -0.316559<br>O 1.142786 -1.593223 -2.339923<br>O 0.125559 -1.270067 2.112661<br>S -3.517479 1.983033 -0.606504<br>O -2.661044 -0.123036 1.415340<br>C -3.923079 -0.810445 1.544150<br>H -0.945268 -2.951126 -1.105863<br>H -1.473486 -2.333945 0.481043<br>H 3.876096 -0.299364 -2.033293<br>H 2.706875 0.107538 2.848081<br>H 5.504314 0.684186 -0.390048<br>H 4.887266 0.982819 1.981674<br>H -4.747565 -0.102762 1.435724<br>H -3.999906 -1.603752 0.795893<br>H -3.923129 -1.239339 2.544263<br>H 0.821737 2.244370 0.280758<br>H 0.249522 1.462038 -1.228712<br>H -0.616291 2.888139 -0.564069<br>O 3.998200 2.388111 -0.576770<br>H 3.035616 2.323184 -0.431872 | C 4.033262 0.714762 1.338446<br>C 2.859528 0.215243 1.825706<br>C 2.024423 -0.489042 0.937667<br>C 2.366376 -0.650000 -0.439164<br>C 3.506280 -0.170913 -0.973789<br>C 4.498043 0.526827 -0.082925<br>C 0.709581 -1.086087 1.153544<br>N 0.297314 -1.599729 -0.097847<br>C 1.231779 -1.352590 -1.099177<br>C -1.028330 -2.085022 -0.358868<br>S -2.069285 -0.922984 -1.347490<br>P -2.328412 0.655953 0.002430<br>O -0.864825 1.162992 0.418863<br>C -0.084328 1.960019 -0.496622<br>O 1.089622 -1.664129 -2.266935<br>O 0.051844 -1.177625 2.176296<br>S -3.549720 1.969260 -0.726644<br>O -2.679090 -0.005570 1.417319<br>C -3.953591 -0.653350 1.611662<br>H -0.988455 -2.992586 -0.963607<br>H -1.514859 -2.300116 0.593377<br>H 3.745017 -0.272393 -2.028844<br>H 2.563321 0.370265 2.858205<br>H 5.413866 -0.084423 -0.059807<br>H 4.702439 1.281078 1.979109<br>H -4.760775 0.075924 1.517252<br>H -4.082499 -1.461709 0.887079<br>H -3.926585 -1.057909 2.621519<br>H 0.863199 2.145818 0.008865<br>H 0.088262 1.409172 -1.426985<br>H -0.595390 2.902592 -0.701659<br>O 4.916464 1.767098 -0.654447<br>H 4.151279 2.361494 -0.677575 |



**Table S63.** Optimized Cartesian coordinates for the stationary points involved in the C7-addition pathway in aqueous phase calculated at the M06-2X/6-31+G(d,p) level of theory.

| MCR(C7-add)                                                                                                                                                                                                                                                                                                                                                                                                                                                                                                                                                                                                                                                                                                                                                                                                                                                                                                                                                                                                                                                                                                                                       | TS(C7-add)                                                                                                                                                                                                                                                                                                                                                                                                                                                                                                                                                                                                                                                                                                                                                                                                                                                                                                                                                                                                                                                                                                                                      | Adduct(C7-add)                                                                                                                                                                                                                                                                                                                                                                                                                                                                                                                                                                                                                                                                                                                                                                                                                                                                                                                                                                                                                                                                                                                                  |
|---------------------------------------------------------------------------------------------------------------------------------------------------------------------------------------------------------------------------------------------------------------------------------------------------------------------------------------------------------------------------------------------------------------------------------------------------------------------------------------------------------------------------------------------------------------------------------------------------------------------------------------------------------------------------------------------------------------------------------------------------------------------------------------------------------------------------------------------------------------------------------------------------------------------------------------------------------------------------------------------------------------------------------------------------------------------------------------------------------------------------------------------------|-------------------------------------------------------------------------------------------------------------------------------------------------------------------------------------------------------------------------------------------------------------------------------------------------------------------------------------------------------------------------------------------------------------------------------------------------------------------------------------------------------------------------------------------------------------------------------------------------------------------------------------------------------------------------------------------------------------------------------------------------------------------------------------------------------------------------------------------------------------------------------------------------------------------------------------------------------------------------------------------------------------------------------------------------------------------------------------------------------------------------------------------------|-------------------------------------------------------------------------------------------------------------------------------------------------------------------------------------------------------------------------------------------------------------------------------------------------------------------------------------------------------------------------------------------------------------------------------------------------------------------------------------------------------------------------------------------------------------------------------------------------------------------------------------------------------------------------------------------------------------------------------------------------------------------------------------------------------------------------------------------------------------------------------------------------------------------------------------------------------------------------------------------------------------------------------------------------------------------------------------------------------------------------------------------------|
| 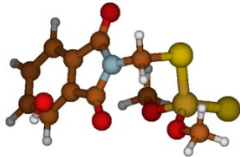                                                                                                                                                                                                                                                                                                                                                                                                                                                                                                                                                                                                                                                                                                                                                                                                                                                                                                                                                                                                                                                                 |                                                                                                                                                                                                                                                                                                                                                                                                                                                                                                                                                                                                                                                                                                                                                                                                                                                                                                                                                                                                                                                               |                                                                                                                                                                                                                                                                                                                                                                                                                                                                                                                                                                                                                                                                                                                                                                                                                                                                                                                                                                                                                                                              |
| C 4.085285 -0.822083 -1.584132<br>C 3.051344 0.121971 -1.612078<br>C 2.243199 0.197584 -0.491841<br>C 2.446440 -0.616864 0.619959<br>C 3.466565 -1.551001 0.660677<br>C 4.288491 -1.642069 -0.469624<br>C 1.072412 1.071391 -0.218547<br>N 0.631097 0.739863 1.069692<br>C 1.399898 -0.288660 1.624827<br>C -0.607410 1.198397 1.633697<br>S -1.941434 -0.078765 1.657195<br>P -2.292346 -0.351015 -0.388193<br>O -0.897537 -0.790393 -1.048726<br>C -0.406307 -2.137274 -0.879322<br>O 1.195862 -0.779041 2.717247<br>O 0.576001 1.927731 -0.921502<br>S -3.811977 -1.518485 -0.661578<br>O -2.329610 1.108454 -1.044108<br>C -3.413719 2.009019 -0.736016<br>H -0.470853 1.466083 2.682748<br>H -0.939693 2.073647 1.073751<br>H 3.621105 -2.184932 1.527652<br>H 2.887541 0.762352 -2.473089<br>H 5.099658 -2.362637 -0.482136<br>H 4.741887 -0.920377 -2.442291<br>H -4.362672 1.576590 -1.059926<br>H -3.436432 2.220601 0.336276<br>H -3.205196 2.920956 -1.292052<br>H 0.548971 -2.169808 -1.402262<br>H -0.260746 -2.357308 0.183170<br>H -1.105374 -2.848681 -1.323125<br>O 2.714508 3.422817 -0.108616<br>H 3.072908 3.106670 -0.963516 | C 4.153895 -0.860083 -1.501423<br>C 3.130096 0.083973 -1.645995<br>C 2.323626 0.304651 -0.544644<br>C 2.518237 -0.368137 0.657370<br>C 3.530542 -1.300964 0.813101<br>C 4.352184 -1.538379 -0.293985<br>C 1.151945 1.217944 -0.380832<br>N 0.660613 0.970492 0.918005<br>C 1.453499 0.057352 1.603080<br>C -0.601582 1.454788 1.400920<br>S -1.866491 0.130421 1.647058<br>P -2.242427 -0.468929 -0.320993<br>O -0.833468 -0.888277 -0.962243<br>C -0.234118 -2.157305 -0.626135<br>O 1.249543 -0.306235 2.747460<br>O 0.441252 1.708578 -1.297748<br>S -3.664167 -1.783488 -0.361390<br>O -2.428659 0.867474 -1.182296<br>C -3.582634 1.705678 -0.966178<br>H -0.489709 1.901744 2.390746<br>H -0.978685 2.203097 0.702216<br>H 3.673198 -1.829174 1.750304<br>H 2.971965 0.613322 -2.580332<br>H 5.154983 -2.264357 -0.218233<br>H 4.805995 -1.071694 -2.342515<br>H -4.496417 1.147764 -1.181439<br>H -3.593704 2.075210 0.062532<br>H -3.476478 2.536978 -1.660396<br>H 0.721086 -2.180459 -1.150077<br>H -0.071895 -2.228719 0.454231<br>H -0.873035 -2.973771 -0.968181<br>O 1.895199 2.888962 -0.237313<br>H 2.390269 2.998488 -1.075237 | C 4.289187 -0.586326 -1.488961<br>C 3.308983 0.412522 -1.516913<br>C 2.431943 0.466513 -0.446885<br>C 2.519484 -0.428548 0.611616<br>C 3.488007 -1.419826 0.652957<br>C 4.379200 -1.486679 -0.421616<br>C 1.290439 1.426230 -0.192649<br>N 0.694335 0.899528 1.023964<br>C 1.408799 -0.144686 1.556990<br>C -0.574198 1.346671 1.526389<br>S -1.866239 0.026545 1.635797<br>P -2.246452 -0.423878 -0.367520<br>O -0.834494 -0.762183 -1.050751<br>C -0.197137 -2.030779 -0.795127<br>O 1.136927 -0.716493 2.605008<br>O 0.392372 1.567325 -1.241769<br>S -3.632730 -1.772368 -0.491773<br>O -2.487043 0.961791 -1.132238<br>C -3.675206 1.732372 -0.856976<br>H -0.488561 1.698006 2.557452<br>H -0.935600 2.162505 0.897922<br>H 3.543814 -2.117814 1.482367<br>H 3.236589 1.109100 -2.346749<br>H 5.149811 -2.250532 -0.433226<br>H 4.990822 -0.667002 -2.312955<br>H -4.564501 1.158773 -1.126313<br>H -3.707095 2.013259 0.198955<br>H -3.598829 2.622662 -1.478094<br>H 0.776166 -1.976504 -1.282079<br>H -0.072741 -2.189633 0.280854<br>H -0.791410 -2.838209 -1.227415<br>O 1.670567 2.759941 0.038297<br>H 2.237838 3.062180 -0.691430 |



**Table S64.** Optimized Cartesian coordinates for the stationary points involved in the C9-addition pathway in aqueous phase calculated at the M06-2X/6-31+G(d,p) level of theory.

| MCR(C9-add)                                                                                                                                                                                                                                                                                                                                                                                                                                                                                                                                                                                                                                                                                                                                                                                                                                                                                                                                                                                                                                                                                                                                        | TS(C9-add)                                                                                                                                                                                                                                                                                                                                                                                                                                                                                                                                                                                                                                                                                                                                                                                                                                                                                                                                                                                                                                                                                                                                       | Adduct(C9-add)                                                                                                                                                                                                                                                                                                                                                                                                                                                                                                                                                                                                                                                                                                                                                                                                                                                                                                                                                                                                                                                                                                                                     |
|----------------------------------------------------------------------------------------------------------------------------------------------------------------------------------------------------------------------------------------------------------------------------------------------------------------------------------------------------------------------------------------------------------------------------------------------------------------------------------------------------------------------------------------------------------------------------------------------------------------------------------------------------------------------------------------------------------------------------------------------------------------------------------------------------------------------------------------------------------------------------------------------------------------------------------------------------------------------------------------------------------------------------------------------------------------------------------------------------------------------------------------------------|--------------------------------------------------------------------------------------------------------------------------------------------------------------------------------------------------------------------------------------------------------------------------------------------------------------------------------------------------------------------------------------------------------------------------------------------------------------------------------------------------------------------------------------------------------------------------------------------------------------------------------------------------------------------------------------------------------------------------------------------------------------------------------------------------------------------------------------------------------------------------------------------------------------------------------------------------------------------------------------------------------------------------------------------------------------------------------------------------------------------------------------------------|----------------------------------------------------------------------------------------------------------------------------------------------------------------------------------------------------------------------------------------------------------------------------------------------------------------------------------------------------------------------------------------------------------------------------------------------------------------------------------------------------------------------------------------------------------------------------------------------------------------------------------------------------------------------------------------------------------------------------------------------------------------------------------------------------------------------------------------------------------------------------------------------------------------------------------------------------------------------------------------------------------------------------------------------------------------------------------------------------------------------------------------------------|
| 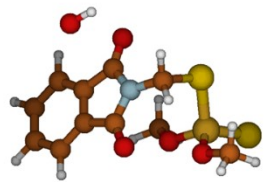                                                                                                                                                                                                                                                                                                                                                                                                                                                                                                                                                                                                                                                                                                                                                                                                                                                                                                                                                                                                                                                                  |                                                                                                                                                                                                                                                                                                                                                                                                                                                                                                                                                                                                                                                                                                                                                                                                                                                                                                                                                                                                                                                                |                                                                                                                                                                                                                                                                                                                                                                                                                                                                                                                                                                                                                                                                                                                                                                                                                                                                                                                                                                                                                                                                 |
| C -3.897268 -2.239592 0.459481<br>C -2.811151 -1.808325 1.231454<br>C -2.128155 -0.691802 0.783175<br>C -2.500699 -0.021825 -0.380421<br>C -3.574623 -0.434255 -1.148719<br>C -4.272151 -1.565543 -0.706841<br>C -0.943154 -0.000462 1.356401<br>N -0.666060 1.071961 0.494074<br>C -1.553092 1.105737 -0.583031<br>C 0.512305 1.887680 0.574208<br>S 1.767021 1.522968 -0.730738<br>P 2.354001 -0.417265 -0.207887<br>O 1.028717 -1.322155 -0.216174<br>C 0.446474 -1.739247 -1.469592<br>O -1.500910 1.917917 -1.487177<br>O -0.322027 -0.250756 2.367355<br>S 3.833571 -0.997277 -1.312607<br>O 2.545205 -0.425190 1.380999<br>C 3.632742 0.310648 1.978802<br>H 0.256383 2.937797 0.419373<br>H 0.955630 1.760680 1.562775<br>H -3.860204 0.092802 -2.053384<br>H -2.516113 -2.328094 2.137164<br>H -5.119415 -1.927482 -1.279898<br>H -4.459096 -3.114031 0.770805<br>H 4.588400 -0.076957 1.619825<br>H 3.541432 1.375183 1.747642<br>H 3.540019 0.152051 3.051421<br>H -0.444176 -2.308436 -1.205291<br>H 0.169937 -0.865797 -2.068970<br>H 1.150004 -2.369079 -2.017409<br>O -3.359355 3.129233 0.095247<br>H -2.660287 3.805076 -0.022273 | C -3.942648 -2.114236 0.364425<br>C -2.856627 -1.741105 1.162783<br>C -2.174319 -0.591382 0.799401<br>C -2.548535 0.162781 -0.307753<br>C -3.621848 -0.191532 -1.104100<br>C -4.316790 -1.354125 -0.749048<br>C -0.965328 0.027390 1.400595<br>N -0.662346 1.137684 0.611811<br>C -1.594522 1.308380 -0.429583<br>C 0.560907 1.879474 0.704301<br>S 1.779774 1.518522 -0.639377<br>P 2.277384 -0.472304 -0.239550<br>O 0.911324 -1.314344 -0.269464<br>C 0.268227 -1.601302 -1.529354<br>O -1.314501 1.952883 -1.477668<br>O -0.334424 -0.320525 2.379906<br>S 3.704065 -1.056517 -1.411429<br>O 2.502478 -0.585341 1.341192<br>C 3.643262 0.051409 1.952993<br>H 0.366031 2.950093 0.609329<br>H 1.015637 1.677341 1.675235<br>H -3.908124 0.400226 -1.967630<br>H -2.554726 -2.328841 2.023685<br>H -5.162153 -1.673611 -1.349700<br>H -4.503124 -3.010667 0.608354<br>H 4.566728 -0.379238 1.560370<br>H 3.617616 1.129213 1.772064<br>H 3.555990 -0.150495 3.018795<br>H -0.633923 -2.159319 -1.280064<br>H 0.004749 -0.669448 -2.040531<br>H 0.926241 -2.206557 -2.156092<br>O -2.668162 2.725137 0.019593<br>H -2.041099 3.472960 0.113227 | C -4.164358 -1.816122 0.377997<br>C -3.034334 -1.562334 1.160477<br>C -2.251212 -0.472275 0.812033<br>C -2.582853 0.340390 -0.265666<br>C -3.696386 0.102324 -1.053821<br>C -4.491040 -0.995801 -0.708102<br>C -1.014509 0.048744 1.443837<br>N -0.675170 1.195349 0.758241<br>C -1.517069 1.411681 -0.426006<br>C 0.588990 1.854872 0.903086<br>S 1.775384 1.562079 -0.486239<br>P 2.206387 -0.480050 -0.239326<br>O 0.814336 -1.266178 -0.278656<br>C 0.297748 -1.809354 -1.513985<br>O -0.836700 1.061414 -1.569134<br>O -0.409516 -0.404254 2.405836<br>S 3.589297 -1.031675 -1.475237<br>O 2.470605 -0.667089 1.329512<br>C 3.630956 -0.070667 1.945307<br>H 0.460201 2.940063 0.910361<br>H 1.040662 1.536721 1.844254<br>H -3.942168 0.737799 -1.898209<br>H -2.777854 -2.188676 2.009038<br>H -5.376546 -1.218050 -1.294618<br>H -4.801923 -2.661028 0.616428<br>H 4.541081 -0.489450 1.510821<br>H 3.612639 1.015045 1.818457<br>H 3.565828 -0.323998 3.001675<br>H -0.755123 -2.019162 -1.323689<br>H 0.391630 -1.088773 -2.327530<br>H 0.832797 -2.730064 -1.751767<br>O -2.063580 2.691880 -0.476617<br>H -1.392494 3.321454 -0.787892 |

**Table S65.** Optimized Cartesian coordinates for the stationary points involved in the P12-addition pathway in aqueous phase calculated at the M06-2X/6-31+G(d,p) level of theory.

| MCR(P12-add)                                                                      |           |           |           | TS(P12-add)                                                                       |           |           |           | MCP(P12-add)                                                                        |           |           |           | Product1(P12-add)                                                                   |           |           |           | Product2(P12-add)                                                                   |           |           |           |
|-----------------------------------------------------------------------------------|-----------|-----------|-----------|-----------------------------------------------------------------------------------|-----------|-----------|-----------|-------------------------------------------------------------------------------------|-----------|-----------|-----------|-------------------------------------------------------------------------------------|-----------|-----------|-----------|-------------------------------------------------------------------------------------|-----------|-----------|-----------|
| 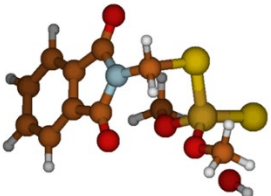 |           |           |           |  |           |           |           |  |           |           |           |  |           |           |           |  |           |           |           |
| C                                                                                 | -4.225282 | -1.849103 | 0.444628  | C                                                                                 | -4.298160 | -1.758857 | 0.388925  | C                                                                                   | -3.736812 | -1.945862 | 0.489443  | P                                                                                   | 0.005266  | 0.044001  | 0.325265  | C                                                                                   | -0.608413 | 3.430079  | -0.698840 |
| C                                                                                 | -3.150581 | -1.422614 | 1.234605  | C                                                                                 | -3.209181 | -1.392851 | 1.189796  | C                                                                                   | -2.730009 | -1.368817 | 1.274832  | O                                                                                   | -0.561955 | -0.048762 | 1.816878  | C                                                                                   | -0.305053 | 2.271723  | -1.425733 |
| C                                                                                 | -2.464879 | -0.300181 | 0.805742  | C                                                                                 | -2.482432 | -0.285697 | 0.790293  | C                                                                                   | -2.173950 | -0.190190 | 0.812630  | O                                                                                   | 1.440397  | -0.634176 | 0.486790  | C                                                                                   | -0.005467 | 1.134876  | -0.696981 |
| C                                                                                 | -2.822871 | 0.381130  | -0.356068 | C                                                                                 | -2.813720 | 0.438590  | -0.352978 | C                                                                                   | -2.589625 | 0.401006  | -0.377467 | O                                                                                   | -0.797886 | -1.125967 | -0.409760 | C                                                                                   | -0.005467 | 1.134876  | 0.696981  |
| C                                                                                 | -3.884195 | -0.029116 | -1.143445 | C                                                                                 | -3.888581 | 0.088509  | -1.150766 | C                                                                                   | -3.587149 | -0.154830 | -1.159005 | S                                                                                   | -0.048173 | 1.790942  | -0.513519 | C                                                                                   | -0.305053 | 2.271723  | 1.425733  |
| C                                                                                 | -4.585086 | -1.165550 | -0.720980 | C                                                                                 | -4.631265 | -1.032218 | -0.758323 | C                                                                                   | -4.158613 | -1.349760 | -0.702736 | C                                                                                   | 2.282913  | -0.805361 | -0.673620 | C                                                                                   | -0.608413 | 3.430079  | 0.698840  |
| C                                                                                 | -1.278041 | 0.374280  | 1.392415  | C                                                                                 | -1.273644 | 0.332600  | 1.395151  | C                                                                                   | -1.073570 | 0.637967  | 1.379081  | C                                                                                   | -2.179105 | -0.925361 | -0.775701 | C                                                                                   | 0.347762  | -0.236109 | -1.154792 |
| N                                                                                 | -0.990510 | 1.458712  | 0.547237  | N                                                                                 | -0.947705 | 1.428208  | 0.582442  | N                                                                                   | -0.886291 | 1.698546  | 0.487763  | H                                                                                   | -0.528476 | 0.782797  | 2.318201  | N                                                                                   | 0.602990  | -0.978820 | -0.000000 |
| C                                                                                 | -1.866661 | 1.504073  | -0.542958 | C                                                                                 | -1.817106 | 1.531843  | -0.506985 | C                                                                                   | -1.760420 | 1.616813  | -0.594497 | H                                                                                   | 3.180635  | -1.307048 | -0.317635 | C                                                                                   | 0.347762  | -0.236109 | 1.154792  |
| C                                                                                 | 0.217716  | 2.226928  | 0.621766  | C                                                                                 | 0.294729  | 2.145749  | 0.676170  | C                                                                                   | 0.180693  | 2.668795  | 0.572888  | H                                                                                   | -2.759438 | -0.619232 | 0.097937  | C                                                                                   | 0.862361  | -2.396113 | -0.000000 |
| S                                                                                 | 1.450017  | 1.817773  | -0.698041 | S                                                                                 | 1.510427  | 1.719311  | -0.641692 | S                                                                                   | 1.397186  | 2.573156  | -0.756307 | H                                                                                   | 2.538525  | 0.169046  | -1.095028 | S                                                                                   | -0.608413 | -3.438430 | -0.000001 |
| P                                                                                 | 1.933705  | -0.144005 | -0.187073 | P                                                                                 | 1.968427  | -0.292184 | -0.168567 | P                                                                                   | 1.947076  | -1.099624 | -0.066241 | H                                                                                   | 1.775327  | -1.424107 | -1.416661 | O                                                                                   | 0.411704  | -0.680825 | 2.284004  |
| O                                                                                 | 0.592500  | -1.002166 | -0.209045 | O                                                                                 | 0.556939  | -1.029383 | -0.231615 | O                                                                                   | 0.407853  | -0.987410 | -0.473056 | H                                                                                   | -2.533607 | -1.887567 | -1.140618 | O                                                                                   | 0.411704  | -0.680825 | -2.284004 |
| C                                                                                 | 0.019592  | -1.438641 | -1.463348 | C                                                                                 | -0.000818 | -1.419028 | -1.506041 | C                                                                                   | -0.222988 | -2.124952 | -1.101392 | H                                                                                   | -2.248486 | -0.173413 | -1.564205 | H                                                                                   | 1.457097  | -2.646265 | 0.883426  |
| O                                                                                 | -1.797582 | 2.320583  | -1.439443 | O                                                                                 | -1.722042 | 2.369922  | -1.381845 | O                                                                                   | -1.796829 | 2.418445  | -1.508955 | H                                                                                   | 1.457097  | -2.646265 | -0.883426 |                                                                                     |           |           |           |
| O                                                                                 | -0.656187 | 0.101295  | 2.396819  | O                                                                                 | -0.665337 | 0.009092  | 2.393733  | O                                                                                   | -0.460669 | 0.479009  | 2.415600  | H                                                                                   | -0.304894 | 2.266131  | 2.510860  |                                                                                     |           |           |           |
| S                                                                                 | 3.395084  | -0.709280 | -1.382281 | S                                                                                 | 3.418207  | -0.672757 | -1.482311 | S                                                                                   | 3.247888  | -1.253634 | -1.494947 | H                                                                                   | -0.304894 | 2.266131  | -2.510860 |                                                                                     |           |           |           |
| O                                                                                 | 2.186781  | -0.195570 | 1.380768  | O                                                                                 | 2.200765  | -0.265766 | 1.404729  | O                                                                                   | 2.007426  | 0.211431  | 0.838161  | H                                                                                   | -0.849134 | 4.345087  | 1.229965  |                                                                                     |           |           |           |
| C                                                                                 | 3.375386  | 0.399664  | 1.949797  | C                                                                                 | 3.390986  | 0.339080  | 1.955660  | C                                                                                   | 3.262581  | 0.628025  | 1.413554  | H                                                                                   | -0.849134 | 4.345087  | -1.229965 |                                                                                     |           |           |           |
| H                                                                                 | 0.009352  | 3.286744  | 0.466767  | H                                                                                 | 0.122137  | 3.216163  | 0.554296  | H                                                                                   | -0.232471 | 3.682908  | 0.544337  |                                                                                     |           |           |           |                                                                                     |           |           |           |
| H                                                                                 | 0.667293  | 2.079939  | 1.604482  | H                                                                                 | 0.729180  | 1.955888  | 1.658407  | H                                                                                   | 0.679684  | 2.534898  | 1.535680  |                                                                                     |           |           |           |                                                                                     |           |           |           |
| H                                                                                 | -4.156998 | 0.502552  | -2.049228 | H                                                                                 | -4.141293 | 0.653472  | -2.042116 | H                                                                                   | -3.905959 | 0.309153  | -2.086760 |                                                                                     |           |           |           |                                                                                     |           |           |           |
| H                                                                                 | -2.864412 | -1.951071 | 2.138126  | H                                                                                 | -2.943795 | -1.954408 | 2.079624  | H                                                                                   | -2.395536 | -1.830330 | 2.198415  |                                                                                     |           |           |           |                                                                                     |           |           |           |
| H                                                                                 | -5.422364 | -1.525210 | -1.309942 | H                                                                                 | -5.480939 | -1.344806 | -1.356333 | H                                                                                   | -4.940722 | -1.824488 | -1.286004 |                                                                                     |           |           |           |                                                                                     |           |           |           |
| H                                                                                 | -4.788844 | -2.728012 | 0.739803  | H                                                                                 | -4.894147 | -2.623690 | 0.661126  | H                                                                                   | -4.197919 | -2.874055 | 0.810864  |                                                                                     |           |           |           |                                                                                     |           |           |           |
| H                                                                                 | 4.254215  | -0.169691 | 1.640688  | H                                                                                 | 4.261627  | -0.272251 | 1.708000  | H                                                                                   | 3.957662  | 0.921080  | 0.623451  |                                                                                     |           |           |           |                                                                                     |           |           |           |
| H                                                                                 | 3.463473  | 1.444084  | 1.640473  | H                                                                                 | 3.512944  | 1.356690  | 1.575952  | H                                                                                   | 3.028088  | 1.483283  | 2.046460  |                                                                                     |           |           |           |                                                                                     |           |           |           |
| H                                                                                 | 3.242319  | 0.338092  | 3.027790  | H                                                                                 | 3.235779  | 0.357144  | 3.032477  | H                                                                                   | 3.686071  | -0.178985 | 2.016195  |                                                                                     |           |           |           |                                                                                     |           |           |           |
| H                                                                                 | -0.896177 | -1.964962 | -1.196533 | H                                                                                 | -0.959839 | -1.881876 | -1.275293 | H                                                                                   | -0.270722 | -2.957656 | -0.396418 |                                                                                     |           |           |           |                                                                                     |           |           |           |
| H                                                                                 | -0.211645 | -0.574813 | -2.093958 | H                                                                                 | -0.149550 | -0.537908 | -2.137805 | H                                                                                   | -1.227233 | -1.802165 | -1.374219 |                                                                                     |           |           |           |                                                                                     |           |           |           |
| H                                                                                 | 0.712709  | -2.112670 | -1.970026 | H                                                                                 | 0.658562  | -2.139004 | -1.994927 | H                                                                                   | 0.329429  | -2.412476 | -1.999517 |                                                                                     |           |           |           |                                                                                     |           |           |           |
| O                                                                                 | 2.996710  | -2.711754 | -0.140665 | O                                                                                 | 2.768038  | -2.415731 | -0.087498 | O                                                                                   | 1.975608  | -2.306304 | 0.993414  |                                                                                     |           |           |           |                                                                                     |           |           |           |
| H                                                                                 | 3.809097  | -2.596006 | 0.381749  | H                                                                                 | 3.566940  | -2.416374 | 0.466625  | H                                                                                   | 2.638408  | -2.989542 | 0.801544  |                                                                                     |           |           |           |                                                                                     |           |           |           |

**Table S66.** Optimized Cartesian coordinates for the stationary points involved in the S17-addition pathway in aqueous phase calculated at the M06-2X/6-31+G(d,p) level of theory.

| MCR(S17-add)                                                                      |           |           |           | TS(S17-add)                                                                        |           |           |           | Adduct(S17-add)                                                                     |           |           |           |
|-----------------------------------------------------------------------------------|-----------|-----------|-----------|------------------------------------------------------------------------------------|-----------|-----------|-----------|-------------------------------------------------------------------------------------|-----------|-----------|-----------|
| 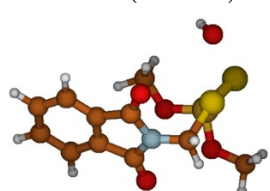 |           |           |           |  |           |           |           |  |           |           |           |
| C                                                                                 | 4.415279  | -0.045836 | -1.623912 | C                                                                                  | -4.298951 | -1.331446 | 1.206059  | C                                                                                   | -3.999152 | -1.930606 | 0.994384  |
| C                                                                                 | 3.357535  | 0.860991  | -1.481738 | C                                                                                  | -3.281364 | -0.500693 | 1.691465  | C                                                                                   | -3.035786 | -1.127214 | 1.617044  |
| C                                                                                 | 2.539680  | 0.700815  | -0.377396 | C                                                                                  | -2.540942 | 0.196206  | 0.753237  | C                                                                                   | -2.465055 | -0.126352 | 0.851147  |
| C                                                                                 | 2.754531  | -0.311782 | 0.555448  | C                                                                                  | -2.792448 | 0.083969  | -0.612368 | C                                                                                   | -2.830200 | 0.081759  | -0.476742 |
| C                                                                                 | 3.797377  | -1.211920 | 0.427639  | C                                                                                  | -3.796498 | -0.731193 | -1.104193 | C                                                                                   | -3.783343 | -0.702636 | -1.102192 |
| C                                                                                 | 4.630951  | -1.061820 | -0.687665 | C                                                                                  | -4.551671 | -1.444020 | -0.164610 | C                                                                                   | -4.365753 | -1.722066 | -0.338976 |
| C                                                                                 | 1.335152  | 1.466647  | 0.038073  | C                                                                                  | -1.385305 | 1.112715  | 0.937091  | C                                                                                   | -1.394784 | 0.846659  | 1.192971  |
| N                                                                                 | 0.888535  | 0.871951  | 1.228821  | N                                                                                  | -1.005549 | 1.525439  | -0.349572 | N                                                                                   | -1.181514 | 1.616632  | 0.040246  |
| C                                                                                 | 1.685814  | -0.221077 | 1.584929  | C                                                                                  | -1.796070 | 0.920792  | -1.331776 | C                                                                                   | -1.995213 | 1.190167  | -1.012162 |
| C                                                                                 | -0.377014 | 1.157425  | 1.843921  | C                                                                                  | 0.229939  | 2.198938  | -0.638922 | C                                                                                   | -0.026797 | 2.456096  | -0.145644 |
| S                                                                                 | -1.634171 | -0.175891 | 1.599433  | S                                                                                  | 1.516348  | 1.077205  | -1.364531 | S                                                                                   | 1.260721  | 1.701749  | -1.231922 |
| P                                                                                 | -1.977301 | 0.019510  | -0.446536 | P                                                                                  | 1.907202  | -0.288206 | 0.228561  | P                                                                                   | 1.930613  | -0.065405 | -0.117267 |
| O                                                                                 | -0.604132 | -0.241495 | -1.213778 | O                                                                                  | 0.508305  | -0.986083 | 0.606405  | O                                                                                   | 0.546124  | -0.865488 | 0.182367  |
| C                                                                                 | -0.025203 | -1.561981 | -1.330410 | C                                                                                  | -0.008116 | -2.022863 | -0.257791 | C                                                                                   | 0.056144  | -1.757499 | -0.837402 |
| O                                                                                 | 1.484500  | -0.924471 | 2.554404  | O                                                                                  | -1.641534 | 1.079370  | -2.526601 | O                                                                                   | -1.974879 | 1.664482  | -2.131275 |
| O                                                                                 | 0.815040  | 2.425531  | -0.491739 | O                                                                                  | -0.852837 | 1.477576  | 1.964008  | O                                                                                   | -0.807617 | 0.999397  | 2.243780  |
| S                                                                                 | -3.545832 | -1.022098 | -1.023368 | S                                                                                  | 3.507242  | -1.625454 | 0.285176  | S                                                                                   | 3.599015  | -1.730176 | 0.186434  |
| O                                                                                 | -2.072892 | 1.577589  | -0.765683 | O                                                                                  | 2.000486  | 0.617347  | 1.545154  | O                                                                                   | 2.071619  | 0.516020  | 1.390897  |
| C                                                                                 | -3.194014 | 2.361438  | -0.297041 | C                                                                                  | 3.063921  | 1.582279  | 1.693899  | C                                                                                   | 3.072763  | 1.513385  | 1.669956  |
| H                                                                                 | -0.269223 | 1.220000  | 2.928209  | H                                                                                  | 0.075023  | 2.972158  | -1.393732 | H                                                                                   | -0.311006 | 3.386766  | -0.640518 |
| H                                                                                 | -0.747138 | 2.107734  | 1.457423  | H                                                                                  | 0.602890  | 2.651419  | 0.280431  | H                                                                                   | 0.391141  | 2.679485  | 0.836680  |
| H                                                                                 | 3.957935  | -2.000781 | 1.155175  | H                                                                                  | -3.985775 | -0.818594 | -2.169104 | H                                                                                   | -4.060329 | -0.540585 | -2.138816 |
| H                                                                                 | 3.183697  | 1.649603  | -2.206453 | H                                                                                  | -3.077379 | -0.412784 | 2.753649  | H                                                                                   | -2.743137 | -1.287625 | 2.649625  |
| H                                                                                 | 5.459074  | -1.748119 | -0.830491 | H                                                                                  | -5.346871 | -2.098717 | -0.505644 | H                                                                                   | -5.113648 | -2.365564 | -0.790504 |
| H                                                                                 | 5.079702  | 0.038754  | -2.477456 | H                                                                                  | -4.901634 | -1.901255 | 1.905581  | H                                                                                   | -4.468545 | -2.732535 | 1.554560  |
| H                                                                                 | -4.099240 | 2.064134  | -0.829311 | H                                                                                  | 4.032656  | 1.077926  | 1.687289  | H                                                                                   | 4.043832  | 1.213959  | 1.265367  |
| H                                                                                 | -3.322451 | 2.234965  | 0.780983  | H                                                                                  | 3.015037  | 2.324710  | 0.893449  | H                                                                                   | 2.772309  | 2.475712  | 1.247828  |
| H                                                                                 | -2.941134 | 3.394736  | -0.525506 | H                                                                                  | 2.893983  | 2.058865  | 2.657399  | H                                                                                   | 3.130846  | 1.583416  | 2.754929  |
| H                                                                                 | 0.906788  | -1.419436 | -1.876115 | H                                                                                  | -0.958874 | -2.326551 | 0.179922  | H                                                                                   | -0.830878 | -2.235919 | -0.421117 |
| H                                                                                 | 0.174317  | -1.973612 | -0.337207 | H                                                                                  | -0.167018 | -1.630035 | -1.266963 | H                                                                                   | -0.211255 | -1.196390 | -1.738851 |
| H                                                                                 | -0.697566 | -2.214067 | -1.891091 | H                                                                                  | 0.682440  | -2.869734 | -0.280826 | H                                                                                   | 0.806947  | -2.517663 | -1.074480 |
| O                                                                                 | -2.557402 | -2.842145 | 0.197438  | O                                                                                  | 3.616217  | -1.528659 | -1.540666 | O                                                                                   | 3.857919  | -2.059254 | -1.440240 |
| H                                                                                 | -2.406385 | -3.339865 | -0.625076 | H                                                                                  | 3.088812  | -2.274921 | -1.872127 | H                                                                                   | 3.207089  | -2.714990 | -1.738164 |

**Table S67.** Vibrational frequencies and rotational constants for the stationary points involved in the H2O-abstraction pathway in aqueous phase calculated at the M06-2X/6-31+G(d,p) level of theory.

| MCR(H2O-abs)<br>$C_1 - ^2A$                                                                                                                                                                                                                                                                                                                                                                                                                                                                                             | TS(H2O-abs)<br>$C_1 - ^2A$                                                                                                                                                                                                                                                                                                                                                                                                                                                                                                      | MCP(H2O-abs)<br>$C_1 - ^2A$                                                                                                                                                                                                                                                                                                                                                                                                                                                                                             | Rad(H2O-abs)<br>$C_1 - ^2A$                                                                                                                                                                                                                                                                                                                                                                                                                                               |
|-------------------------------------------------------------------------------------------------------------------------------------------------------------------------------------------------------------------------------------------------------------------------------------------------------------------------------------------------------------------------------------------------------------------------------------------------------------------------------------------------------------------------|---------------------------------------------------------------------------------------------------------------------------------------------------------------------------------------------------------------------------------------------------------------------------------------------------------------------------------------------------------------------------------------------------------------------------------------------------------------------------------------------------------------------------------|-------------------------------------------------------------------------------------------------------------------------------------------------------------------------------------------------------------------------------------------------------------------------------------------------------------------------------------------------------------------------------------------------------------------------------------------------------------------------------------------------------------------------|---------------------------------------------------------------------------------------------------------------------------------------------------------------------------------------------------------------------------------------------------------------------------------------------------------------------------------------------------------------------------------------------------------------------------------------------------------------------------|
| Vibrational frequencies ( $\text{cm}^{-1}$ )                                                                                                                                                                                                                                                                                                                                                                                                                                                                            | Vibrational frequencies ( $\text{cm}^{-1}$ )                                                                                                                                                                                                                                                                                                                                                                                                                                                                                    | Vibrational frequencies ( $\text{cm}^{-1}$ )                                                                                                                                                                                                                                                                                                                                                                                                                                                                            | Vibrational frequencies ( $\text{cm}^{-1}$ )                                                                                                                                                                                                                                                                                                                                                                                                                              |
| 26, 33, 44, 59, 70, 91, 101, 111, 116, 134, 145, 149, 166, 184, 190, 195, 212, 234, 253, 272, 292, 331, 363, 386, 396, 409, 425, 463, 477, 487, 525, 540, 559, 617, 648, 676, 687, 709, 730, 733, 792, 810, 818, 832, 847, 922, 933, 1003, 1010, 1040, 1045, 1056, 1102, 1119, 1122, 1168, 1181, 1183, 1191, 1201, 1205, 1236, 1311, 1324, 1346, 1397, 1430, 1455, 1478, 1480, 1485, 1486, 1490, 1497, 1510, 1510, 1687, 1690, 1757, 1855, 3081, 3090, 3134, 3174, 3179, 3202, 3206, 3217, 3234, 3241, 3247, 3252, 3557 | <b>1291i</b> , 22, 41, 58, 60, 78, 85, 99, 113, 121, 131, 146, 165, 178, 185, 188, 207, 230, 238, 263, 268, 295, 331, 360, 386, 396, 411, 423, 466, 489, 522, 539, 611, 644, 677, 686, 706, 730, 736, 772, 791, 810, 819, 837, 862, 908, 922, 994, 1003, 1029, 1041, 1051, 1055, 1101, 1106, 1121, 1169, 1180, 1183, 1191, 1200, 1205, 1235, 1241, 1313, 1349, 1399, 1406, 1443, 1479, 1480, 1484, 1485, 1490, 1492, 1510, 1511, 1686, 1688, 1773, 1859, 3081, 3090, 3173, 3174, 3179, 3207, 3218, 3235, 3242, 3248, 3253, 3698 | 31, 37, 44, 69, 72, 109, 112, 118, 124, 129, 139, 151, 162, 183, 186, 191, 199, 210, 243, 249, 279, 287, 318, 336, 364, 386, 395, 407, 412, 424, 463, 463, 467, 535, 547, 611, 642, 675, 702, 726, 732, 787, 802, 809, 820, 838, 900, 922, 1003, 1036, 1042, 1056, 1061, 1098, 1111, 1121, 1168, 1178, 1181, 1191, 1203, 1207, 1251, 1311, 1341, 1399, 1411, 1478, 1481, 1484, 1485, 1489, 1490, 1509, 1509, 1625, 1685, 1688, 1771, 1859, 3090, 3091, 3180, 3183, 3209, 3218, 3234, 3241, 3247, 3252, 3261, 3749, 3891 | 32, 43, 70, 102, 110, 115, 122, 140, 157, 159, 179, 187, 190, 196, 237, 245, 277, 281, 317, 356, 383, 393, 409, 422, 459, 461, 463, 534, 546, 610, 642, 674, 702, 721, 731, 785, 803, 805, 820, 838, 899, 920, 1001, 1036, 1039, 1057, 1058, 1101, 1113, 1122, 1169, 1179, 1182, 1191, 1203, 1207, 1251, 1311, 1345, 1400, 1408, 1480, 1482, 1484, 1484, 1489, 1492, 1509, 1510, 1685, 1689, 1774, 1861, 3091, 3092, 3180, 3184, 3209, 3217, 3233, 3241, 3247, 3252, 3259 |
| Rotational constants (GHz)                                                                                                                                                                                                                                                                                                                                                                                                                                                                                              | Rotational constants (GHz)                                                                                                                                                                                                                                                                                                                                                                                                                                                                                                      | Rotational constants (GHz)                                                                                                                                                                                                                                                                                                                                                                                                                                                                                              | Rotational constants (GHz)                                                                                                                                                                                                                                                                                                                                                                                                                                                |
| 0.42058, 0.20803, 0.18298                                                                                                                                                                                                                                                                                                                                                                                                                                                                                               | 0.41750, 0.20792, 0.18165                                                                                                                                                                                                                                                                                                                                                                                                                                                                                                       | 0.37883, 0.22112, 0.20147                                                                                                                                                                                                                                                                                                                                                                                                                                                                                               | 0.52946, 0.23389, 0.21740                                                                                                                                                                                                                                                                                                                                                                                                                                                 |

**Table S68.** Vibrational frequencies and rotational constants for the stationary points involved in the H21-abstraction pathway in aqueous phase calculated at the M06-2X/6-31+G(d,p) level of theory.

| MCR(H21-abs)<br>C <sub>1</sub> - <sup>2</sup> A                                                                                                                                                                                                                                                                                                                                                                                                                                                                          | TS(H21-abs)<br>C <sub>1</sub> - <sup>2</sup> A                                                                                                                                                                                                                                                                                                                                                                                                                                                                                    | MCP(H21-abs)<br>C <sub>1</sub> - <sup>2</sup> A                                                                                                                                                                                                                                                                                                                                                                                                                                                                       | Rad(H21-abs)<br>C <sub>1</sub> - <sup>2</sup> A                                                                                                                                                                                                                                                                                                                                                                                                                           |
|--------------------------------------------------------------------------------------------------------------------------------------------------------------------------------------------------------------------------------------------------------------------------------------------------------------------------------------------------------------------------------------------------------------------------------------------------------------------------------------------------------------------------|-----------------------------------------------------------------------------------------------------------------------------------------------------------------------------------------------------------------------------------------------------------------------------------------------------------------------------------------------------------------------------------------------------------------------------------------------------------------------------------------------------------------------------------|-----------------------------------------------------------------------------------------------------------------------------------------------------------------------------------------------------------------------------------------------------------------------------------------------------------------------------------------------------------------------------------------------------------------------------------------------------------------------------------------------------------------------|---------------------------------------------------------------------------------------------------------------------------------------------------------------------------------------------------------------------------------------------------------------------------------------------------------------------------------------------------------------------------------------------------------------------------------------------------------------------------|
| Vibrational frequencies (cm <sup>-1</sup> )                                                                                                                                                                                                                                                                                                                                                                                                                                                                              | Vibrational frequencies (cm <sup>-1</sup> )                                                                                                                                                                                                                                                                                                                                                                                                                                                                                       | Vibrational frequencies (cm <sup>-1</sup> )                                                                                                                                                                                                                                                                                                                                                                                                                                                                           | Vibrational frequencies (cm <sup>-1</sup> )                                                                                                                                                                                                                                                                                                                                                                                                                               |
| 24, 40, 53, 60, 70, 101, 106, 117, 125, 135, 149, 156, 171, 191, 199, 208, 216, 236, 254, 271, 304, 333, 359, 379, 387, 397, 410, 427, 467, 495, 524, 541, 580, 619, 650, 677, 690, 709, 731, 734, 791, 810, 817, 828, 845, 920, 931, 1001, 1009, 1040, 1045, 1051, 1103, 1115, 1124, 1168, 1178, 1183, 1190, 1201, 1205, 1235, 1311, 1327, 1344, 1398, 1439, 1460, 1479, 1481, 1482, 1486, 1491, 1498, 1510, 1511, 1688, 1691, 1761, 1853, 3083, 3088, 3139, 3174, 3177, 3206, 3208, 3209, 3234, 3242, 3248, 3252, 3559 | <b>1324i</b> , 29, 52, 64, 66, 93, 116, 123, 126, 139, 147, 154, 169, 174, 193, 197, 205, 234, 253, 267, 286, 305, 332, 361, 387, 401, 413, 425, 465, 474, 522, 540, 606, 640, 672, 679, 698, 724, 731, 760, 781, 793, 811, 824, 839, 884, 923, 958, 1004, 1034, 1041, 1053, 1053, 1100, 1107, 1118, 1169, 1175, 1184, 1191, 1200, 1205, 1238, 1261, 1312, 1331, 1395, 1404, 1427, 1478, 1481, 1484, 1485, 1486, 1499, 1511, 1512, 1687, 1691, 1772, 1859, 3082, 3092, 3165, 3177, 3183, 3206, 3219, 3233, 3241, 3248, 3252, 3683 | 19, 33, 39, 59, 68, 81, 95, 103, 119, 136, 141, 148, 156, 177, 189, 195, 204, 232, 259, 262, 269, 324, 344, 354, 364, 387, 395, 411, 418, 457, 462, 470, 524, 540, 573, 613, 639, 674, 705, 722, 731, 785, 806, 808, 819, 834, 900, 919, 1001, 1036, 1039, 1057, 1057, 1101, 1115, 1121, 1169, 1178, 1183, 1191, 1202, 1207, 1251, 1312, 1349, 1397, 1410, 1479, 1481, 1486, 1486, 1489, 1501, 1510, 1511, 1630, 1684, 1691, 1769, 1859, 3082, 3088, 3175, 3176, 3208, 3216, 3235, 3243, 3249, 3253, 3272, 3756, 3906 | 32, 43, 70, 102, 111, 115, 122, 140, 157, 160, 179, 188, 190, 196, 237, 245, 277, 281, 317, 357, 383, 393, 409, 422, 459, 461, 463, 534, 546, 610, 642, 674, 702, 721, 731, 784, 803, 805, 820, 838, 899, 920, 1001, 1036, 1039, 1057, 1058, 1101, 1113, 1122, 1169, 1179, 1182, 1191, 1203, 1207, 1251, 1311, 1345, 1400, 1408, 1480, 1482, 1484, 1484, 1489, 1492, 1509, 1510, 1685, 1689, 1774, 1861, 3091, 3092, 3180, 3184, 3209, 3217, 3233, 3241, 3247, 3252, 3259 |
| Rotational constants (GHz)                                                                                                                                                                                                                                                                                                                                                                                                                                                                                               | Rotational constants (GHz)                                                                                                                                                                                                                                                                                                                                                                                                                                                                                                        | Rotational constants (GHz)                                                                                                                                                                                                                                                                                                                                                                                                                                                                                            | Rotational constants (GHz)                                                                                                                                                                                                                                                                                                                                                                                                                                                |
| 0.44676, 0.19445, 0.18127                                                                                                                                                                                                                                                                                                                                                                                                                                                                                                | 0.45443, 0.20342, 0.19180                                                                                                                                                                                                                                                                                                                                                                                                                                                                                                         | 0.45313, 0.18690, 0.16688                                                                                                                                                                                                                                                                                                                                                                                                                                                                                             | 0.52944, 0.23391, 0.21741                                                                                                                                                                                                                                                                                                                                                                                                                                                 |

**Table S69.** Vibrational frequencies and rotational constants for the stationary points involved in the H22-abstraction pathway in aqueous phase calculated at the M06-2X/6-31+G(d,p) level of theory.

| MCR(H22-abs)<br>C <sub>1</sub> - <sup>2</sup> A                                                                                                                                                                                                                                                                                                                                                                                                                                                                        | TS(H22-abs)<br>C <sub>1</sub> - <sup>2</sup> A                                                                                                                                                                                                                                                                                                                                                                                                                                                                                  | MCP(H22-abs)<br>C <sub>1</sub> - <sup>2</sup> A                                                                                                                                                                                                                                                                                                                                                                                                                                                                        | Rad(H22-abs)<br>C <sub>1</sub> - <sup>2</sup> A                                                                                                                                                                                                                                                                                                                                                                                                                         |
|------------------------------------------------------------------------------------------------------------------------------------------------------------------------------------------------------------------------------------------------------------------------------------------------------------------------------------------------------------------------------------------------------------------------------------------------------------------------------------------------------------------------|---------------------------------------------------------------------------------------------------------------------------------------------------------------------------------------------------------------------------------------------------------------------------------------------------------------------------------------------------------------------------------------------------------------------------------------------------------------------------------------------------------------------------------|------------------------------------------------------------------------------------------------------------------------------------------------------------------------------------------------------------------------------------------------------------------------------------------------------------------------------------------------------------------------------------------------------------------------------------------------------------------------------------------------------------------------|-------------------------------------------------------------------------------------------------------------------------------------------------------------------------------------------------------------------------------------------------------------------------------------------------------------------------------------------------------------------------------------------------------------------------------------------------------------------------|
| Vibrational frequencies (cm <sup>-1</sup> )                                                                                                                                                                                                                                                                                                                                                                                                                                                                            | Vibrational frequencies (cm <sup>-1</sup> )                                                                                                                                                                                                                                                                                                                                                                                                                                                                                     | Vibrational frequencies (cm <sup>-1</sup> )                                                                                                                                                                                                                                                                                                                                                                                                                                                                            | Vibrational frequencies (cm <sup>-1</sup> )                                                                                                                                                                                                                                                                                                                                                                                                                             |
| 9, 28, 48, 69, 81, 98, 110, 117, 125, 134, 150, 156, 171, 182, 193, 199, 205, 235, 255, 272, 303, 334, 370, 389, 398, 411, 426, 467, 469, 493, 522, 539, 570, 620, 652, 677, 692, 711, 731, 735, 793, 808, 817, 831, 847, 920, 936, 1001, 1012, 1038, 1055, 1057, 1111, 1120, 1128, 1170, 1182, 1184, 1198, 1201, 1207, 1236, 1316, 1326, 1354, 1398, 1435, 1458, 1479, 1483, 1484, 1487, 1494, 1499, 1510, 1513, 1688, 1690, 1758, 1855, 3081, 3090, 3136, 3174, 3180, 3204, 3205, 3219, 3234, 3241, 3248, 3253, 3506 | <b>1574i</b> , 19, 41, 49, 78, 85, 95, 117, 121, 124, 143, 156, 168, 181, 188, 193, 205, 235, 257, 270, 302, 334, 340, 358, 383, 395, 405, 425, 432, 461, 494, 533, 549, 621, 645, 650, 688, 706, 730, 737, 776, 791, 815, 830, 844, 849, 899, 934, 964, 1025, 1028, 1055, 1074, 1120, 1124, 1132, 1170, 1179, 1183, 1201, 1206, 1231, 1268, 1324, 1351, 1383, 1406, 1433, 1458, 1479, 1482, 1483, 1486, 1492, 1496, 1497, 1521, 1666, 1690, 1767, 1859, 3079, 3091, 3139, 3173, 3180, 3204, 3207, 3217, 3237, 3246, 3253, 3663 | 24, 29, 50, 71, 78, 92, 107, 118, 125, 135, 148, 152, 171, 183, 191, 195, 207, 227, 234, 251, 272, 304, 334, 358, 372, 390, 401, 426, 433, 459, 493, 519, 532, 539, 617, 650, 652, 689, 708, 732, 743, 785, 808, 817, 831, 843, 933, 948, 1013, 1023, 1055, 1065, 1107, 1120, 1128, 1162, 1182, 1184, 1200, 1207, 1222, 1260, 1326, 1353, 1379, 1431, 1452, 1479, 1480, 1482, 1484, 1488, 1488, 1494, 1498, 1611, 1638, 1689, 1766, 1859, 3081, 3090, 3137, 3174, 3180, 3203, 3206, 3219, 3232, 3241, 3250, 3728, 3897 | 29, 41, 64, 82, 99, 112, 123, 136, 147, 166, 179, 184, 191, 208, 231, 244, 268, 299, 332, 358, 388, 399, 425, 433, 457, 493, 527, 537, 613, 649, 652, 686, 705, 729, 740, 784, 808, 817, 831, 842, 931, 946, 1012, 1022, 1055, 1066, 1105, 1120, 1126, 1162, 1179, 1182, 1201, 1206, 1221, 1260, 1326, 1351, 1376, 1428, 1453, 1478, 1479, 1480, 1482, 1486, 1487, 1491, 1493, 1635, 1688, 1769, 1858, 3080, 3090, 3137, 3173, 3179, 3205, 3207, 3217, 3231, 3240, 3249 |
| Rotational constants (GHz)                                                                                                                                                                                                                                                                                                                                                                                                                                                                                             | Rotational constants (GHz)                                                                                                                                                                                                                                                                                                                                                                                                                                                                                                      | Rotational constants (GHz)                                                                                                                                                                                                                                                                                                                                                                                                                                                                                             | Rotational constants (GHz)                                                                                                                                                                                                                                                                                                                                                                                                                                              |
| 0.42636, 0.19319, 0.17420                                                                                                                                                                                                                                                                                                                                                                                                                                                                                              | 0.46720, 0.18912, 0.17854                                                                                                                                                                                                                                                                                                                                                                                                                                                                                                       | 0.43628, 0.18995, 0.17324                                                                                                                                                                                                                                                                                                                                                                                                                                                                                              | 0.56199, 0.21172, 0.20648                                                                                                                                                                                                                                                                                                                                                                                                                                               |

**Table S70.** Vibrational frequencies and rotational constants for the stationary points involved in the H23-abstraction pathway in aqueous phase calculated at the M06-2X/6-31+G(d,p) level of theory.

| MCR(H23-abs)<br>$C_1 - ^2A$                                                                                                                                                                                                                                                                                                                                                                                                                                                                                             | TS(H23-abs)<br>$C_1 - ^2A$                                                                                                                                                                                                                                                                                                                                                                                                                                                                                                      | MCP(H23-abs)<br>$C_1 - ^2A$                                                                                                                                                                                                                                                                                                                                                                                                                                                                                           | Rad(H23-abs)<br>$C_1 - ^2A$                                                                                                                                                                                                                                                                                                                                                                                                                                             |
|-------------------------------------------------------------------------------------------------------------------------------------------------------------------------------------------------------------------------------------------------------------------------------------------------------------------------------------------------------------------------------------------------------------------------------------------------------------------------------------------------------------------------|---------------------------------------------------------------------------------------------------------------------------------------------------------------------------------------------------------------------------------------------------------------------------------------------------------------------------------------------------------------------------------------------------------------------------------------------------------------------------------------------------------------------------------|-----------------------------------------------------------------------------------------------------------------------------------------------------------------------------------------------------------------------------------------------------------------------------------------------------------------------------------------------------------------------------------------------------------------------------------------------------------------------------------------------------------------------|-------------------------------------------------------------------------------------------------------------------------------------------------------------------------------------------------------------------------------------------------------------------------------------------------------------------------------------------------------------------------------------------------------------------------------------------------------------------------|
| Vibrational frequencies ( $\text{cm}^{-1}$ )                                                                                                                                                                                                                                                                                                                                                                                                                                                                            | Vibrational frequencies ( $\text{cm}^{-1}$ )                                                                                                                                                                                                                                                                                                                                                                                                                                                                                    | Vibrational frequencies ( $\text{cm}^{-1}$ )                                                                                                                                                                                                                                                                                                                                                                                                                                                                          | Vibrational frequencies ( $\text{cm}^{-1}$ )                                                                                                                                                                                                                                                                                                                                                                                                                            |
| 10, 39, 48, 56, 74, 83, 106, 112, 127, 138, 145, 153, 170, 177, 186, 198, 203, 232, 250, 271, 300, 335, 340, 367, 389, 400, 417, 428, 466, 490, 505, 525, 541, 619, 649, 679, 689, 708, 730, 737, 798, 811, 818, 831, 846, 926, 936, 1004, 1010, 1040, 1050, 1056, 1105, 1121, 1124, 1169, 1177, 1182, 1192, 1200, 1206, 1236, 1313, 1323, 1351, 1398, 1434, 1456, 1477, 1480, 1482, 1486, 1490, 1492, 1510, 1512, 1687, 1690, 1759, 1851, 3079, 3089, 3139, 3173, 3178, 3200, 3208, 3217, 3231, 3237, 3244, 3251, 3574 | <b>1579i</b> , 30, 38, 49, 74, 81, 98, 115, 122, 132, 139, 158, 174, 182, 196, 208, 230, 237, 256, 272, 301, 336, 349, 363, 382, 396, 407, 424, 429, 461, 493, 538, 540, 620, 650, 652, 684, 701, 724, 731, 783, 789, 815, 830, 843, 849, 885, 934, 963, 1024, 1029, 1055, 1073, 1119, 1122, 1131, 1170, 1180, 1186, 1203, 1208, 1231, 1265, 1324, 1346, 1383, 1399, 1433, 1456, 1480, 1483, 1485, 1488, 1492, 1496, 1501, 1519, 1664, 1688, 1769, 1858, 3084, 3090, 3138, 3176, 3179, 3204, 3205, 3217, 3234, 3245, 3250, 3659 | 15, 30, 44, 52, 65, 72, 95, 108, 119, 125, 138, 150, 155, 174, 184, 190, 192, 198, 230, 248, 270, 293, 303, 337, 365, 389, 401, 427, 435, 457, 491, 501, 525, 541, 617, 649, 652, 687, 705, 731, 746, 780, 810, 817, 830, 842, 931, 945, 1012, 1022, 1057, 1066, 1106, 1121, 1126, 1163, 1177, 1180, 1200, 1205, 1224, 1260, 1324, 1352, 1378, 1429, 1451, 1477, 1478, 1480, 1481, 1484, 1488, 1490, 1490, 1601, 1637, 1688, 1766, 1856, 3078, 3089, 3141, 3171, 3177, 3200, 3209, 3216, 3232, 3242, 3251, 3752, 3894 | 30, 50, 62, 70, 98, 115, 123, 141, 150, 164, 169, 181, 193, 199, 230, 246, 271, 300, 331, 359, 388, 398, 426, 434, 457, 490, 524, 541, 614, 649, 651, 685, 705, 729, 744, 778, 810, 817, 829, 841, 928, 942, 1012, 1022, 1056, 1066, 1107, 1119, 1122, 1164, 1180, 1184, 1201, 1206, 1223, 1259, 1325, 1343, 1378, 1430, 1450, 1478, 1480, 1480, 1481, 1487, 1488, 1489, 1497, 1637, 1690, 1769, 1858, 3081, 3090, 3136, 3173, 3179, 3204, 3205, 3217, 3231, 3241, 3251 |
| Rotational constants (GHz)                                                                                                                                                                                                                                                                                                                                                                                                                                                                                              | Rotational constants (GHz)                                                                                                                                                                                                                                                                                                                                                                                                                                                                                                      | Rotational constants (GHz)                                                                                                                                                                                                                                                                                                                                                                                                                                                                                            | Rotational constants (GHz)                                                                                                                                                                                                                                                                                                                                                                                                                                              |
| 0.44263, 0.21426, 0.19411                                                                                                                                                                                                                                                                                                                                                                                                                                                                                               | 0.43802, 0.20367, 0.18616                                                                                                                                                                                                                                                                                                                                                                                                                                                                                                       | 0.43931, 0.21224, 0.19083                                                                                                                                                                                                                                                                                                                                                                                                                                                                                             | 0.56690, 0.20999, 0.20535                                                                                                                                                                                                                                                                                                                                                                                                                                               |

**Table S71.** Vibrational frequencies and rotational constants for the stationary points involved in the H24-abstraction pathway in aqueous phase calculated at the M06-2X/6-31+G(d,p) level of theory.

| MCR(H24-abs)<br>C <sub>1</sub> - <sup>2</sup> A                                                                                                                                                                                                                                                                                                                                                                                                                                                                       | TS(H24-abs)<br>C <sub>1</sub> - <sup>2</sup> A                                                                                                                                                                                                                                                                                                                                                                                                                                                                                   | MCP(H24-abs)<br>C <sub>1</sub> - <sup>2</sup> A                                                                                                                                                                                                                                                                                                                                                                                                                                                                      | Rad(H24-abs)<br>C <sub>1</sub> - <sup>2</sup> A                                                                                                                                                                                                                                                                                                                                                                                                                        |
|-----------------------------------------------------------------------------------------------------------------------------------------------------------------------------------------------------------------------------------------------------------------------------------------------------------------------------------------------------------------------------------------------------------------------------------------------------------------------------------------------------------------------|----------------------------------------------------------------------------------------------------------------------------------------------------------------------------------------------------------------------------------------------------------------------------------------------------------------------------------------------------------------------------------------------------------------------------------------------------------------------------------------------------------------------------------|----------------------------------------------------------------------------------------------------------------------------------------------------------------------------------------------------------------------------------------------------------------------------------------------------------------------------------------------------------------------------------------------------------------------------------------------------------------------------------------------------------------------|------------------------------------------------------------------------------------------------------------------------------------------------------------------------------------------------------------------------------------------------------------------------------------------------------------------------------------------------------------------------------------------------------------------------------------------------------------------------|
| Vibrational frequencies (cm <sup>-1</sup> )                                                                                                                                                                                                                                                                                                                                                                                                                                                                           | Vibrational frequencies (cm <sup>-1</sup> )                                                                                                                                                                                                                                                                                                                                                                                                                                                                                      | Vibrational frequencies (cm <sup>-1</sup> )                                                                                                                                                                                                                                                                                                                                                                                                                                                                          | Vibrational frequencies (cm <sup>-1</sup> )                                                                                                                                                                                                                                                                                                                                                                                                                            |
| 22, 28, 34, 47, 56, 65, 91, 113, 118, 131, 136, 148, 167, 176, 185, 196, 198, 203, 233, 245, 268, 290, 333, 358, 387, 396, 412, 425, 467, 492, 525, 540, 612, 616, 648, 676, 688, 708, 730, 735, 794, 811, 817, 830, 846, 920, 934, 999, 1011, 1035, 1043, 1056, 1103, 1120, 1125, 1169, 1180, 1183, 1190, 1200, 1205, 1233, 1310, 1327, 1352, 1397, 1433, 1455, 1478, 1481, 1482, 1487, 1487, 1497, 1508, 1508, 1686, 1689, 1766, 1855, 3081, 3089, 3138, 3173, 3178, 3202, 3208, 3217, 3235, 3242, 3248, 3253, 3730 | <b>1349i</b> , 27, 44, 62, 64, 73, 77, 101, 122, 130, 143, 150, 170, 182, 195, 197, 205, 220, 235, 248, 271, 295, 332, 336, 377, 395, 409, 426, 430, 481, 495, 534, 577, 616, 649, 658, 694, 705, 729, 754, 787, 795, 816, 832, 858, 875, 933, 937, 1008, 1017, 1057, 1058, 1074, 1120, 1121, 1125, 1180, 1182, 1186, 1203, 1208, 1211, 1241, 1282, 1322, 1351, 1387, 1432, 1454, 1470, 1479, 1481, 1485, 1486, 1491, 1500, 1504, 1670, 1686, 1769, 1859, 3080, 3091, 3138, 3174, 3179, 3205, 3206, 3217, 3239, 3245, 3249, 3758 | 19, 27, 35, 43, 64, 73, 96, 105, 115, 121, 135, 148, 164, 167, 182, 189, 191, 204, 213, 234, 249, 269, 276, 293, 330, 359, 387, 396, 405, 425, 479, 492, 523, 541, 615, 651, 662, 688, 706, 724, 749, 791, 815, 829, 839, 844, 910, 929, 998, 1012, 1044, 1056, 1099, 1121, 1127, 1173, 1181, 1184, 1201, 1206, 1219, 1264, 1326, 1356, 1386, 1432, 1446, 1453, 1478, 1482, 1483, 1483, 1484, 1491, 1501, 1598, 1644, 1688, 1768, 1859, 3080, 3088, 3136, 3173, 3177, 3204, 3206, 3218, 3233, 3238, 3245, 3830, 3926 | 22, 43, 59, 63, 94, 113, 121, 135, 148, 165, 183, 192, 202, 215, 232, 247, 269, 290, 332, 357, 387, 396, 405, 426, 472, 491, 522, 540, 614, 648, 656, 685, 705, 724, 749, 791, 816, 827, 836, 842, 906, 926, 996, 1012, 1044, 1057, 1100, 1120, 1122, 1174, 1181, 1185, 1202, 1207, 1220, 1264, 1325, 1344, 1386, 1430, 1445, 1451, 1479, 1481, 1483, 1483, 1487, 1490, 1501, 1643, 1687, 1768, 1858, 3081, 3089, 3137, 3174, 3177, 3204, 3205, 3217, 3232, 3238, 3244 |
| Rotational constants (GHz)                                                                                                                                                                                                                                                                                                                                                                                                                                                                                            | Rotational constants (GHz)                                                                                                                                                                                                                                                                                                                                                                                                                                                                                                       | Rotational constants (GHz)                                                                                                                                                                                                                                                                                                                                                                                                                                                                                           | Rotational constants (GHz)                                                                                                                                                                                                                                                                                                                                                                                                                                             |
| 0.54391, 0.16956, 0.16747                                                                                                                                                                                                                                                                                                                                                                                                                                                                                             | 0.52174, 0.15875, 0.15621                                                                                                                                                                                                                                                                                                                                                                                                                                                                                                        | 0.50496, 0.15269, 0.14959                                                                                                                                                                                                                                                                                                                                                                                                                                                                                            | 0.56146, 0.21345, 0.20821                                                                                                                                                                                                                                                                                                                                                                                                                                              |



**Table S72.** Vibrational frequencies and rotational constants for the stationary points involved in the H25-abstraction pathway in aqueous phase calculated at the M06-2X/6-31+G(d,p) level of theory.

| MCR(H25-abs)<br>$C_1 - ^2A$                                                                                                                                                                                                                                                                                                                                                                                                                                                                                            | TS(H25-abs)<br>$C_1 - ^2A$                                                                                                                                                                                                                                                                                                                                                                                                                                                                                                      | MCP(H25-abs)<br>$C_1 - ^2A$                                                                                                                                                                                                                                                                                                                                                                                                                                                                                          | Rad(H25-abs)<br>$C_1 - ^2A$                                                                                                                                                                                                                                                                                                                                                                                                                                            |
|------------------------------------------------------------------------------------------------------------------------------------------------------------------------------------------------------------------------------------------------------------------------------------------------------------------------------------------------------------------------------------------------------------------------------------------------------------------------------------------------------------------------|---------------------------------------------------------------------------------------------------------------------------------------------------------------------------------------------------------------------------------------------------------------------------------------------------------------------------------------------------------------------------------------------------------------------------------------------------------------------------------------------------------------------------------|----------------------------------------------------------------------------------------------------------------------------------------------------------------------------------------------------------------------------------------------------------------------------------------------------------------------------------------------------------------------------------------------------------------------------------------------------------------------------------------------------------------------|------------------------------------------------------------------------------------------------------------------------------------------------------------------------------------------------------------------------------------------------------------------------------------------------------------------------------------------------------------------------------------------------------------------------------------------------------------------------|
| Vibrational frequencies ( $\text{cm}^{-1}$ )                                                                                                                                                                                                                                                                                                                                                                                                                                                                           | Vibrational frequencies ( $\text{cm}^{-1}$ )                                                                                                                                                                                                                                                                                                                                                                                                                                                                                    | Vibrational frequencies ( $\text{cm}^{-1}$ )                                                                                                                                                                                                                                                                                                                                                                                                                                                                         | Vibrational frequencies ( $\text{cm}^{-1}$ )                                                                                                                                                                                                                                                                                                                                                                                                                           |
| 25, 29, 44, 56, 63, 70, 97, 107, 119, 122, 135, 147, 154, 159, 179, 189, 197, 231, 246, 267, 295, 327, 357, 373, 387, 402, 410, 424, 436, 468, 493, 525, 539, 615, 650, 678, 689, 709, 729, 733, 792, 812, 819, 831, 847, 922, 934, 1002, 1008, 1037, 1044, 1056, 1101, 1120, 1127, 1167, 1177, 1181, 1189, 1203, 1209, 1235, 1310, 1327, 1354, 1395, 1436, 1456, 1476, 1479, 1482, 1485, 1490, 1492, 1507, 1509, 1684, 1686, 1764, 1854, 3081, 3090, 3136, 3172, 3179, 3205, 3217, 3221, 3234, 3241, 3247, 3252, 3733 | <b>1349i</b> , 27, 46, 60, 68, 71, 87, 98, 115, 120, 125, 137, 159, 169, 186, 196, 201, 218, 236, 248, 270, 286, 329, 342, 381, 394, 398, 426, 431, 478, 496, 528, 583, 615, 652, 661, 692, 703, 729, 753, 786, 790, 817, 833, 858, 873, 928, 935, 1006, 1017, 1057, 1058, 1069, 1119, 1121, 1125, 1179, 1179, 1185, 1202, 1207, 1209, 1244, 1281, 1326, 1347, 1388, 1431, 1452, 1469, 1480, 1482, 1484, 1486, 1491, 1499, 1504, 1670, 1686, 1770, 1859, 3082, 3089, 3138, 3175, 3178, 3204, 3206, 3218, 3239, 3244, 3249, 3763 | 19, 25, 30, 45, 64, 74, 94, 102, 110, 124, 136, 150, 166, 172, 179, 181, 183, 192, 204, 230, 247, 267, 268, 293, 330, 358, 386, 396, 405, 425, 474, 492, 521, 542, 614, 649, 661, 685, 706, 723, 749, 789, 816, 829, 838, 844, 912, 929, 998, 1011, 1045, 1056, 1100, 1120, 1124, 1174, 1179, 1182, 1200, 1205, 1220, 1265, 1323, 1351, 1386, 1432, 1446, 1453, 1478, 1481, 1483, 1483, 1485, 1490, 1492, 1590, 1643, 1688, 1769, 1859, 3080, 3089, 3136, 3172, 3178, 3203, 3204, 3217, 3233, 3239, 3246, 3833, 3930 | 30, 47, 64, 75, 98, 113, 118, 135, 150, 165, 181, 183, 194, 202, 231, 250, 272, 300, 332, 359, 387, 396, 404, 426, 472, 491, 521, 541, 614, 648, 657, 685, 705, 724, 746, 788, 816, 828, 837, 843, 907, 927, 995, 1012, 1044, 1057, 1101, 1120, 1122, 1174, 1181, 1183, 1201, 1206, 1220, 1264, 1323, 1346, 1387, 1431, 1447, 1453, 1478, 1480, 1481, 1483, 1487, 1489, 1497, 1643, 1688, 1769, 1858, 3080, 3090, 3136, 3173, 3179, 3203, 3204, 3217, 3233, 3240, 3247 |
| Rotational constants (GHz)                                                                                                                                                                                                                                                                                                                                                                                                                                                                                             | Rotational constants (GHz)                                                                                                                                                                                                                                                                                                                                                                                                                                                                                                      | Rotational constants (GHz)                                                                                                                                                                                                                                                                                                                                                                                                                                                                                           | Rotational constants (GHz)                                                                                                                                                                                                                                                                                                                                                                                                                                             |
| 0.46833, 0.18981, 0.17493                                                                                                                                                                                                                                                                                                                                                                                                                                                                                              | 0.46778, 0.17198, 0.15955                                                                                                                                                                                                                                                                                                                                                                                                                                                                                                       | 0.45294, 0.16392, 0.15074                                                                                                                                                                                                                                                                                                                                                                                                                                                                                            | 0.56316, 0.21320, 0.20915                                                                                                                                                                                                                                                                                                                                                                                                                                              |

**Table S73.** Vibrational frequencies and rotational constants for the stationary points involved in the H26-abstraction pathway in aqueous phase calculated at the M06-2X/6-31+G(d,p) level of theory.

| MCR(H26-abs)<br>$C_1 - ^2A$                                                                                                                                                                                                                                                                                                                                                                                                                                                                                             | TS(H26-abs)<br>$C_1 - ^2A$                                                                                                                                                                                                                                                                                                                                                                                                                                                                                                       | MCP(H26-abs)<br>$C_1 - ^2A$                                                                                                                                                                                                                                                                                                                                                                                                                                                                                            | Rad(H26-abs)<br>$C_1 - ^2A$                                                                                                                                                                                                                                                                                                                                                                                                                                             |
|-------------------------------------------------------------------------------------------------------------------------------------------------------------------------------------------------------------------------------------------------------------------------------------------------------------------------------------------------------------------------------------------------------------------------------------------------------------------------------------------------------------------------|----------------------------------------------------------------------------------------------------------------------------------------------------------------------------------------------------------------------------------------------------------------------------------------------------------------------------------------------------------------------------------------------------------------------------------------------------------------------------------------------------------------------------------|------------------------------------------------------------------------------------------------------------------------------------------------------------------------------------------------------------------------------------------------------------------------------------------------------------------------------------------------------------------------------------------------------------------------------------------------------------------------------------------------------------------------|-------------------------------------------------------------------------------------------------------------------------------------------------------------------------------------------------------------------------------------------------------------------------------------------------------------------------------------------------------------------------------------------------------------------------------------------------------------------------|
| Vibrational frequencies ( $cm^{-1}$ )                                                                                                                                                                                                                                                                                                                                                                                                                                                                                   | Vibrational frequencies ( $cm^{-1}$ )                                                                                                                                                                                                                                                                                                                                                                                                                                                                                            | Vibrational frequencies ( $cm^{-1}$ )                                                                                                                                                                                                                                                                                                                                                                                                                                                                                  | Vibrational frequencies ( $cm^{-1}$ )                                                                                                                                                                                                                                                                                                                                                                                                                                   |
| 18, 27, 48, 53, 69, 96, 104, 117, 124, 129, 138, 147, 161, 167, 182, 185, 192, 197, 232, 246, 273, 294, 333, 357, 388, 393, 412, 426, 428, 465, 497, 526, 540, 616, 655, 678, 687, 707, 729, 734, 794, 810, 818, 827, 847, 921, 934, 1001, 1011, 1037, 1045, 1053, 1102, 1119, 1125, 1167, 1180, 1182, 1190, 1200, 1205, 1235, 1310, 1329, 1351, 1397, 1433, 1454, 1478, 1482, 1483, 1487, 1489, 1499, 1509, 1510, 1688, 1690, 1766, 1856, 3081, 3089, 3139, 3174, 3177, 3204, 3208, 3219, 3232, 3239, 3245, 3251, 3688 | <b>1096i</b> , 22, 30, 41, 55, 64, 83, 110, 125, 133, 148, 166, 174, 185, 192, 198, 199, 233, 246, 271, 292, 299, 334, 357, 387, 397, 411, 425, 465, 495, 526, 540, 616, 651, 678, 687, 707, 729, 734, 774, 795, 797, 810, 828, 846, 920, 934, 952, 1001, 1012, 1037, 1044, 1081, 1102, 1124, 1156, 1167, 1182, 1189, 1202, 1218, 1235, 1272, 1309, 1329, 1352, 1396, 1397, 1432, 1437, 1453, 1479, 1484, 1495, 1497, 1508, 1510, 1688, 1690, 1767, 1856, 3083, 3118, 3139, 3178, 3207, 3208, 3221, 3233, 3240, 3246, 3251, 3694 | 21, 28, 45, 56, 73, 100, 108, 121, 134, 140, 149, 162, 170, 178, 187, 190, 195, 198, 234, 244, 246, 272, 302, 329, 357, 372, 390, 400, 412, 426, 467, 496, 527, 540, 551, 615, 653, 678, 685, 707, 729, 734, 795, 803, 812, 830, 848, 921, 936, 1001, 1012, 1038, 1047, 1074, 1103, 1123, 1168, 1172, 1183, 1191, 1202, 1219, 1237, 1312, 1329, 1349, 1398, 1435, 1456, 1475, 1481, 1484, 1496, 1510, 1511, 1605, 1689, 1690, 1768, 1857, 3083, 3137, 3178, 3188, 3205, 3207, 3233, 3240, 3246, 3251, 3346, 3787, 3879 | 27, 42, 64, 94, 106, 118, 131, 147, 150, 165, 173, 186, 193, 207, 232, 246, 271, 306, 330, 358, 389, 399, 411, 426, 466, 494, 526, 535, 539, 615, 654, 678, 685, 707, 729, 734, 794, 803, 811, 829, 847, 921, 935, 1002, 1012, 1040, 1046, 1075, 1102, 1125, 1167, 1174, 1180, 1191, 1201, 1216, 1237, 1312, 1329, 1354, 1396, 1435, 1457, 1474, 1479, 1482, 1491, 1509, 1510, 1688, 1688, 1768, 1856, 3082, 3135, 3176, 3192, 3203, 3207, 3233, 3240, 3246, 3251, 3350 |
| Rotational constants (GHz)                                                                                                                                                                                                                                                                                                                                                                                                                                                                                              | Rotational constants (GHz)                                                                                                                                                                                                                                                                                                                                                                                                                                                                                                       | Rotational constants (GHz)                                                                                                                                                                                                                                                                                                                                                                                                                                                                                             | Rotational constants (GHz)                                                                                                                                                                                                                                                                                                                                                                                                                                              |
| 0.46615, 0.19536, 0.18017                                                                                                                                                                                                                                                                                                                                                                                                                                                                                               | 0.51854, 0.17560, 0.16952                                                                                                                                                                                                                                                                                                                                                                                                                                                                                                        | 0.48150, 0.18266, 0.17146                                                                                                                                                                                                                                                                                                                                                                                                                                                                                              | 0.56060, 0.21312, 0.20822                                                                                                                                                                                                                                                                                                                                                                                                                                               |

**Table S74.** Vibrational frequencies and rotational constants for the stationary points involved in the H27-abstraction pathway in aqueous phase calculated at the M06-2X/6-31+G(d,p) level of theory.

| MCR(H27-abs)<br>$C_1 - ^2A$                                                                                                                                                                                                                                                                                                                                                                                                                                                                                            | TS(H27-abs)<br>$C_1 - ^2A$                                                                                                                                                                                                                                                                                                                                                                                                                                                                                                        | MCP(H27-abs)<br>$C_1 - ^2A$                                                                                                                                                                                                                                                                                                                                                                                                                                                                                           | Rad(H27-abs)<br>$C_1 - ^2A$                                                                                                                                                                                                                                                                                                                                                                                                                                             |
|------------------------------------------------------------------------------------------------------------------------------------------------------------------------------------------------------------------------------------------------------------------------------------------------------------------------------------------------------------------------------------------------------------------------------------------------------------------------------------------------------------------------|-----------------------------------------------------------------------------------------------------------------------------------------------------------------------------------------------------------------------------------------------------------------------------------------------------------------------------------------------------------------------------------------------------------------------------------------------------------------------------------------------------------------------------------|-----------------------------------------------------------------------------------------------------------------------------------------------------------------------------------------------------------------------------------------------------------------------------------------------------------------------------------------------------------------------------------------------------------------------------------------------------------------------------------------------------------------------|-------------------------------------------------------------------------------------------------------------------------------------------------------------------------------------------------------------------------------------------------------------------------------------------------------------------------------------------------------------------------------------------------------------------------------------------------------------------------|
| Vibrational frequencies ( $\text{cm}^{-1}$ )                                                                                                                                                                                                                                                                                                                                                                                                                                                                           | Vibrational frequencies ( $\text{cm}^{-1}$ )                                                                                                                                                                                                                                                                                                                                                                                                                                                                                      | Vibrational frequencies ( $\text{cm}^{-1}$ )                                                                                                                                                                                                                                                                                                                                                                                                                                                                          | Vibrational frequencies ( $\text{cm}^{-1}$ )                                                                                                                                                                                                                                                                                                                                                                                                                            |
| 24, 41, 46, 57, 63, 72, 97, 105, 122, 126, 141, 150, 165, 171, 181, 195, 199, 230, 244, 264, 273, 289, 333, 358, 387, 398, 410, 425, 467, 476, 491, 525, 540, 615, 643, 679, 688, 709, 730, 734, 794, 810, 818, 832, 848, 919, 934, 1000, 1011, 1040, 1046, 1056, 1103, 1117, 1120, 1168, 1182, 1185, 1191, 1201, 1206, 1236, 1310, 1319, 1341, 1397, 1430, 1451, 1480, 1481, 1482, 1486, 1491, 1496, 1510, 1511, 1689, 1689, 1767, 1856, 3082, 3098, 3138, 3175, 3188, 3204, 3209, 3218, 3232, 3240, 3246, 3251, 3741 | <b>1101i</b> , 23, 36, 48, 65, 78, 105, 112, 121, 132, 144, 147, 168, 174, 180, 195, 203, 232, 246, 265, 288, 298, 332, 358, 385, 397, 411, 425, 466, 495, 526, 540, 616, 652, 679, 688, 707, 730, 733, 736, 792, 794, 811, 826, 845, 907, 920, 935, 1001, 1011, 1039, 1047, 1080, 1103, 1125, 1160, 1169, 1184, 1191, 1201, 1204, 1235, 1240, 1312, 1329, 1347, 1369, 1398, 1433, 1451, 1477, 1482, 1483, 1495, 1511, 1511, 1556, 1689, 1690, 1765, 1855, 3081, 3120, 3142, 3175, 3207, 3214, 3228, 3233, 3241, 3247, 3252, 3750 | 21, 28, 45, 52, 67, 97, 106, 120, 123, 135, 146, 149, 167, 183, 189, 200, 207, 222, 233, 246, 274, 298, 305, 331, 358, 388, 400, 411, 413, 425, 467, 496, 532, 540, 618, 654, 679, 685, 692, 707, 730, 735, 795, 798, 811, 829, 850, 923, 936, 1003, 1013, 1040, 1047, 1075, 1103, 1126, 1169, 1174, 1183, 1191, 1202, 1213, 1237, 1312, 1329, 1359, 1398, 1434, 1458, 1470, 1480, 1486, 1495, 1510, 1511, 1612, 1689, 1690, 1766, 1855, 3084, 3134, 3178, 3180, 3203, 3208, 3233, 3241, 3247, 3252, 3335, 3790, 3906 | 27, 38, 60, 73, 102, 118, 123, 147, 164, 179, 182, 186, 191, 201, 231, 246, 274, 305, 330, 358, 388, 398, 411, 425, 466, 494, 526, 540, 615, 618, 653, 678, 686, 707, 729, 733, 793, 804, 811, 828, 847, 921, 935, 1002, 1011, 1040, 1046, 1075, 1102, 1120, 1167, 1171, 1178, 1191, 1200, 1211, 1237, 1312, 1326, 1345, 1397, 1435, 1458, 1469, 1477, 1482, 1492, 1510, 1511, 1688, 1689, 1767, 1856, 3082, 3134, 3175, 3185, 3201, 3207, 3233, 3240, 3246, 3251, 3343 |
| Rotational constants (GHz)                                                                                                                                                                                                                                                                                                                                                                                                                                                                                             | Rotational constants (GHz)                                                                                                                                                                                                                                                                                                                                                                                                                                                                                                        | Rotational constants (GHz)                                                                                                                                                                                                                                                                                                                                                                                                                                                                                            | Rotational constants (GHz)                                                                                                                                                                                                                                                                                                                                                                                                                                              |
| 0.46485, 0.19717, 0.18160                                                                                                                                                                                                                                                                                                                                                                                                                                                                                              | 0.46817, 0.19185, 0.17994                                                                                                                                                                                                                                                                                                                                                                                                                                                                                                         | 0.43638, 0.19452, 0.17624                                                                                                                                                                                                                                                                                                                                                                                                                                                                                             | 0.55997, 0.21367, 0.20891                                                                                                                                                                                                                                                                                                                                                                                                                                               |

**Table S75.** Vibrational frequencies and rotational constants for the stationary points involved in the H28-abstraction pathway in aqueous phase calculated at the M06-2X/6-31+G(d,p) level of theory.

| MCR(H28-abs)<br>C <sub>1</sub> – <sup>2</sup> A                                                                                                                                                                                                                                                                                                                                                                                                                                                                          | TS(H28-abs)<br>C <sub>1</sub> – <sup>2</sup> A                                                                                                                                                                                                                                                                                                                                                                                                                                                                                    | MCP(H28-abs)<br>C <sub>1</sub> – <sup>2</sup> A                                                                                                                                                                                                                                                                                                                                                                                                                                                                       | Rad(H28-abs)<br>C <sub>1</sub> – <sup>2</sup> A                                                                                                                                                                                                                                                                                                                                                                                                                         |
|--------------------------------------------------------------------------------------------------------------------------------------------------------------------------------------------------------------------------------------------------------------------------------------------------------------------------------------------------------------------------------------------------------------------------------------------------------------------------------------------------------------------------|-----------------------------------------------------------------------------------------------------------------------------------------------------------------------------------------------------------------------------------------------------------------------------------------------------------------------------------------------------------------------------------------------------------------------------------------------------------------------------------------------------------------------------------|-----------------------------------------------------------------------------------------------------------------------------------------------------------------------------------------------------------------------------------------------------------------------------------------------------------------------------------------------------------------------------------------------------------------------------------------------------------------------------------------------------------------------|-------------------------------------------------------------------------------------------------------------------------------------------------------------------------------------------------------------------------------------------------------------------------------------------------------------------------------------------------------------------------------------------------------------------------------------------------------------------------|
| Vibrational frequencies (cm <sup>-1</sup> )                                                                                                                                                                                                                                                                                                                                                                                                                                                                              | Vibrational frequencies (cm <sup>-1</sup> )                                                                                                                                                                                                                                                                                                                                                                                                                                                                                       | Vibrational frequencies (cm <sup>-1</sup> )                                                                                                                                                                                                                                                                                                                                                                                                                                                                           | Vibrational frequencies (cm <sup>-1</sup> )                                                                                                                                                                                                                                                                                                                                                                                                                             |
| 24, 40, 53, 59, 70, 100, 106, 117, 125, 135, 149, 155, 171, 190, 199, 208, 217, 235, 254, 271, 303, 333, 358, 376, 387, 397, 410, 427, 467, 495, 524, 541, 580, 619, 650, 677, 690, 709, 731, 734, 791, 810, 817, 828, 845, 920, 931, 1001, 1009, 1040, 1045, 1051, 1103, 1115, 1124, 1168, 1178, 1183, 1190, 1201, 1205, 1235, 1311, 1327, 1344, 1398, 1439, 1460, 1479, 1481, 1482, 1487, 1490, 1498, 1510, 1511, 1688, 1691, 1761, 1853, 3083, 3088, 3140, 3174, 3177, 3206, 3208, 3209, 3234, 3242, 3248, 3252, 3560 | <b>1228i</b> , 32, 40, 51, 74, 88, 100, 117, 129, 133, 149, 165, 169, 190, 194, 215, 231, 250, 268, 271, 300, 329, 361, 389, 393, 411, 421, 466, 490, 493, 527, 541, 617, 650, 677, 686, 707, 731, 735, 775, 793, 810, 818, 842, 850, 918, 921, 933, 1001, 1012, 1039, 1047, 1079, 1103, 1123, 1157, 1167, 1184, 1188, 1191, 1205, 1237, 1311, 1320, 1332, 1347, 1348, 1399, 1437, 1453, 1458, 1482, 1486, 1498, 1511, 1511, 1521, 1689, 1691, 1763, 1853, 3082, 3113, 3139, 3175, 3205, 3209, 3210, 3234, 3241, 3247, 3252, 3622 | 28, 38, 54, 58, 74, 92, 101, 114, 126, 131, 151, 161, 173, 190, 197, 207, 216, 232, 242, 256, 277, 294, 307, 334, 364, 390, 401, 411, 428, 462, 469, 493, 526, 541, 618, 641, 655, 678, 684, 707, 730, 736, 794, 798, 813, 826, 847, 922, 934, 1004, 1011, 1043, 1046, 1073, 1104, 1120, 1170, 1175, 1186, 1192, 1206, 1218, 1237, 1313, 1325, 1346, 1399, 1435, 1465, 1476, 1484, 1488, 1497, 1512, 1512, 1609, 1689, 1691, 1764, 1854, 3082, 3145, 3177, 3186, 3206, 3218, 3234, 3241, 3247, 3253, 3340, 3745, 3873 | 27, 38, 59, 73, 102, 117, 123, 147, 164, 180, 180, 186, 191, 200, 231, 246, 274, 305, 330, 358, 388, 398, 411, 425, 466, 494, 526, 540, 615, 617, 653, 678, 686, 707, 729, 733, 793, 804, 811, 828, 847, 922, 935, 1002, 1011, 1040, 1046, 1075, 1102, 1120, 1167, 1171, 1178, 1191, 1200, 1211, 1237, 1312, 1326, 1345, 1397, 1435, 1458, 1470, 1477, 1482, 1492, 1510, 1511, 1689, 1689, 1767, 1856, 3081, 3134, 3175, 3185, 3201, 3207, 3233, 3240, 3246, 3251, 3343 |
| Rotational constants (GHz)                                                                                                                                                                                                                                                                                                                                                                                                                                                                                               | Rotational constants (GHz)                                                                                                                                                                                                                                                                                                                                                                                                                                                                                                        | Rotational constants (GHz)                                                                                                                                                                                                                                                                                                                                                                                                                                                                                            | Rotational constants (GHz)                                                                                                                                                                                                                                                                                                                                                                                                                                              |
| 0.44689, 0.19438, 0.18120                                                                                                                                                                                                                                                                                                                                                                                                                                                                                                | 0.42493, 0.20861, 0.19135                                                                                                                                                                                                                                                                                                                                                                                                                                                                                                         | 0.40475, 0.21052, 0.18822                                                                                                                                                                                                                                                                                                                                                                                                                                                                                             | 0.55986, 0.21373, 0.20897                                                                                                                                                                                                                                                                                                                                                                                                                                               |

**Table S76.** Vibrational frequencies and rotational constants for the stationary points involved in the H29-abstraction pathway in aqueous phase calculated at the M06-2X/6-31+G(d,p) level of theory.

| MCR(H29-abs)<br>$C_1 - ^2A$                                                                                                                                                                                                                                                                                                                                                                                                                                                                                            | TS(H29-abs)<br>$C_1 - ^2A$                                                                                                                                                                                                                                                                                                                                                                                                                                                                                                       | MCP(H29-abs)<br>$C_1 - ^2A$                                                                                                                                                                                                                                                                                                                                                                                                                                                                                          | Rad(H29-abs)<br>$C_1 - ^2A$                                                                                                                                                                                                                                                                                                                                                                                                                                           |
|------------------------------------------------------------------------------------------------------------------------------------------------------------------------------------------------------------------------------------------------------------------------------------------------------------------------------------------------------------------------------------------------------------------------------------------------------------------------------------------------------------------------|----------------------------------------------------------------------------------------------------------------------------------------------------------------------------------------------------------------------------------------------------------------------------------------------------------------------------------------------------------------------------------------------------------------------------------------------------------------------------------------------------------------------------------|----------------------------------------------------------------------------------------------------------------------------------------------------------------------------------------------------------------------------------------------------------------------------------------------------------------------------------------------------------------------------------------------------------------------------------------------------------------------------------------------------------------------|-----------------------------------------------------------------------------------------------------------------------------------------------------------------------------------------------------------------------------------------------------------------------------------------------------------------------------------------------------------------------------------------------------------------------------------------------------------------------|
| Vibrational frequencies ( $cm^{-1}$ )                                                                                                                                                                                                                                                                                                                                                                                                                                                                                  | Vibrational frequencies ( $cm^{-1}$ )                                                                                                                                                                                                                                                                                                                                                                                                                                                                                            | Vibrational frequencies ( $cm^{-1}$ )                                                                                                                                                                                                                                                                                                                                                                                                                                                                                | Vibrational frequencies ( $cm^{-1}$ )                                                                                                                                                                                                                                                                                                                                                                                                                                 |
| 21, 27, 35, 54, 57, 64, 93, 106, 112, 131, 137, 149, 164, 171, 182, 190, 200, 228, 247, 265, 291, 297, 328, 356, 386, 397, 407, 423, 465, 493, 497, 525, 540, 616, 649, 679, 688, 706, 729, 734, 794, 810, 817, 830, 846, 919, 934, 1000, 1009, 1037, 1046, 1058, 1102, 1123, 1127, 1168, 1179, 1181, 1190, 1200, 1207, 1236, 1311, 1327, 1353, 1397, 1435, 1456, 1473, 1477, 1481, 1485, 1491, 1494, 1508, 1511, 1686, 1687, 1765, 1855, 3073, 3089, 3137, 3165, 3178, 3204, 3205, 3218, 3234, 3241, 3247, 3253, 3728 | <b>1144i</b> , 25, 47, 51, 73, 82, 92, 101, 110, 120, 131, 152, 160, 170, 177, 193, 228, 245, 262, 293, 304, 324, 357, 373, 391, 410, 417, 425, 470, 493, 526, 539, 616, 650, 679, 688, 708, 730, 732, 758, 795, 810, 833, 843, 848, 920, 932, 935, 1000, 1011, 1036, 1045, 1082, 1103, 1125, 1138, 1168, 1175, 1180, 1189, 1190, 1203, 1235, 1310, 1327, 1350, 1372, 1396, 1421, 1436, 1454, 1480, 1484, 1489, 1490, 1509, 1510, 1687, 1688, 1765, 1855, 3089, 3100, 3133, 3179, 3193, 3202, 3218, 3233, 3241, 3247, 3252, 3739 | 33, 44, 56, 61, 73, 88, 95, 106, 121, 131, 145, 148, 168, 180, 187, 195, 200, 232, 246, 256, 277, 294, 305, 329, 362, 387, 395, 409, 410, 428, 464, 496, 526, 540, 617, 648, 655, 675, 688, 709, 730, 730, 785, 789, 807, 836, 849, 920, 936, 1000, 1012, 1037, 1045, 1078, 1102, 1123, 1168, 1169, 1181, 1190, 1204, 1212, 1235, 1310, 1325, 1348, 1398, 1437, 1457, 1467, 1481, 1486, 1490, 1509, 1511, 1609, 1688, 1690, 1764, 1852, 3091, 3138, 3182, 3182, 3207, 3220, 3233, 3239, 3245, 3251, 3333, 3792, 3869 | 31, 45, 61, 74, 97, 108, 115, 134, 148, 150, 176, 184, 195, 199, 232, 246, 273, 293, 328, 357, 387, 397, 409, 423, 464, 493, 526, 539, 615, 648, 654, 674, 687, 708, 729, 730, 788, 791, 807, 835, 848, 919, 935, 999, 1012, 1037, 1045, 1078, 1102, 1121, 1167, 1168, 1183, 1190, 1205, 1212, 1235, 1310, 1326, 1347, 1397, 1435, 1456, 1470, 1483, 1487, 1492, 1510, 1511, 1688, 1690, 1765, 1854, 3091, 3138, 3182, 3183, 3206, 3221, 3233, 3239, 3245, 3251, 3335 |
| Rotational constants (GHz)                                                                                                                                                                                                                                                                                                                                                                                                                                                                                             | Rotational constants (GHz)                                                                                                                                                                                                                                                                                                                                                                                                                                                                                                       | Rotational constants (GHz)                                                                                                                                                                                                                                                                                                                                                                                                                                                                                           | Rotational constants (GHz)                                                                                                                                                                                                                                                                                                                                                                                                                                            |
| 0.48121, 0.18611, 0.17791                                                                                                                                                                                                                                                                                                                                                                                                                                                                                              | 0.47644, 0.19747, 0.18506                                                                                                                                                                                                                                                                                                                                                                                                                                                                                                        | 0.46290, 0.20953, 0.18946                                                                                                                                                                                                                                                                                                                                                                                                                                                                                            | 0.57592, 0.20837, 0.20408                                                                                                                                                                                                                                                                                                                                                                                                                                             |

**Table S77.** Vibrational frequencies and rotational constants for the stationary points involved in the H30-abstraction pathway in aqueous phase calculated at the M06-2X/6-31+G(d,p) level of theory.

| MCR(H30-abs)<br>$C_1 - ^2A$                                                                                                                                                                                                                                                                                                                                                                                                                                                                                            | TS(H30-abs)<br>$C_1 - ^2A$                                                                                                                                                                                                                                                                                                                                                                                                                                                                                                       | MCP(H30-abs)<br>$C_1 - ^2A$                                                                                                                                                                                                                                                                                                                                                                                                                                                                                          | Rad(H30-abs)<br>$C_1 - ^2A$                                                                                                                                                                                                                                                                                                                                                                                                                                           |
|------------------------------------------------------------------------------------------------------------------------------------------------------------------------------------------------------------------------------------------------------------------------------------------------------------------------------------------------------------------------------------------------------------------------------------------------------------------------------------------------------------------------|----------------------------------------------------------------------------------------------------------------------------------------------------------------------------------------------------------------------------------------------------------------------------------------------------------------------------------------------------------------------------------------------------------------------------------------------------------------------------------------------------------------------------------|----------------------------------------------------------------------------------------------------------------------------------------------------------------------------------------------------------------------------------------------------------------------------------------------------------------------------------------------------------------------------------------------------------------------------------------------------------------------------------------------------------------------|-----------------------------------------------------------------------------------------------------------------------------------------------------------------------------------------------------------------------------------------------------------------------------------------------------------------------------------------------------------------------------------------------------------------------------------------------------------------------|
| Vibrational frequencies ( $\text{cm}^{-1}$ )                                                                                                                                                                                                                                                                                                                                                                                                                                                                           | Vibrational frequencies ( $\text{cm}^{-1}$ )                                                                                                                                                                                                                                                                                                                                                                                                                                                                                     | Vibrational frequencies ( $\text{cm}^{-1}$ )                                                                                                                                                                                                                                                                                                                                                                                                                                                                         | Vibrational frequencies ( $\text{cm}^{-1}$ )                                                                                                                                                                                                                                                                                                                                                                                                                          |
| 31, 35, 40, 53, 58, 73, 96, 109, 128, 129, 139, 158, 182, 187, 193, 200, 217, 235, 245, 272, 299, 336, 353, 375, 387, 399, 412, 427, 462, 482, 494, 524, 540, 617, 648, 676, 687, 711, 730, 737, 795, 811, 818, 830, 850, 920, 937, 1001, 1010, 1039, 1045, 1056, 1103, 1120, 1124, 1170, 1179, 1183, 1191, 1197, 1204, 1235, 1311, 1328, 1349, 1397, 1434, 1460, 1471, 1479, 1483, 1485, 1490, 1491, 1510, 1511, 1687, 1690, 1758, 1854, 3074, 3089, 3141, 3169, 3177, 3203, 3208, 3217, 3233, 3240, 3246, 3251, 3633 | <b>1168i</b> , 35, 40, 50, 66, 78, 96, 105, 118, 135, 145, 153, 162, 184, 189, 203, 232, 240, 250, 274, 291, 317, 337, 359, 386, 398, 412, 431, 467, 494, 523, 540, 616, 652, 676, 684, 710, 730, 737, 742, 794, 811, 825, 830, 846, 869, 921, 935, 1002, 1010, 1040, 1045, 1080, 1104, 1120, 1156, 1168, 1182, 1185, 1192, 1205, 1211, 1237, 1311, 1322, 1345, 1349, 1397, 1431, 1456, 1474, 1484, 1485, 1493, 1511, 1512, 1550, 1688, 1691, 1763, 1856, 3090, 3121, 3135, 3179, 3203, 3213, 3219, 3233, 3241, 3247, 3252, 3702 | 26, 32, 44, 61, 73, 79, 98, 112, 128, 135, 143, 158, 168, 176, 188, 195, 207, 232, 246, 255, 281, 296, 305, 321, 337, 362, 390, 398, 410, 427, 462, 495, 524, 539, 616, 654, 674, 687, 708, 727, 729, 734, 787, 791, 811, 836, 847, 919, 935, 1000, 1010, 1039, 1045, 1078, 1103, 1124, 1169, 1176, 1181, 1191, 1204, 1210, 1236, 1311, 1326, 1349, 1397, 1434, 1457, 1467, 1480, 1486, 1491, 1510, 1510, 1610, 1688, 1689, 1766, 1855, 3092, 3140, 3172, 3182, 3209, 3221, 3233, 3240, 3246, 3252, 3324, 3788, 3870 | 31, 45, 61, 74, 96, 108, 115, 134, 148, 150, 176, 183, 195, 199, 232, 246, 273, 292, 328, 357, 387, 397, 409, 423, 464, 493, 526, 539, 615, 647, 654, 674, 687, 708, 729, 730, 788, 791, 807, 835, 848, 919, 935, 999, 1012, 1037, 1045, 1078, 1102, 1121, 1167, 1168, 1183, 1190, 1205, 1212, 1235, 1310, 1326, 1347, 1397, 1435, 1456, 1470, 1483, 1487, 1492, 1510, 1511, 1688, 1690, 1765, 1854, 3091, 3138, 3182, 3183, 3206, 3221, 3233, 3239, 3245, 3251, 3335 |
| Rotational constants (GHz)                                                                                                                                                                                                                                                                                                                                                                                                                                                                                             | Rotational constants (GHz)                                                                                                                                                                                                                                                                                                                                                                                                                                                                                                       | Rotational constants (GHz)                                                                                                                                                                                                                                                                                                                                                                                                                                                                                           | Rotational constants (GHz)                                                                                                                                                                                                                                                                                                                                                                                                                                            |
| 0.43373, 0.21273, 0.19766                                                                                                                                                                                                                                                                                                                                                                                                                                                                                              | 0.45020, 0.21677, 0.20481                                                                                                                                                                                                                                                                                                                                                                                                                                                                                                        | 0.44796, 0.20433, 0.19024                                                                                                                                                                                                                                                                                                                                                                                                                                                                                            | 0.57576, 0.20842, 0.20414                                                                                                                                                                                                                                                                                                                                                                                                                                             |

**Table S78.** Vibrational frequencies and rotational constants for the stationary points involved in the H31-abstraction pathway in aqueous phase calculated at the M06-2X/6-31+G(d,p) level of theory.

| MCR(H31-abs)<br>$C_1 - ^2A$                                                                                                                                                                                                                                                                                                                                                                                                                                                                                             | TS(H31-abs)<br>$C_1 - ^2A$                                                                                                                                                                                                                                                                                                                                                                                                                                                                                                       | MCP(H31-abs)<br>$C_1 - ^2A$                                                                                                                                                                                                                                                                                                                                                                                                                                                                                           | Rad(H31-abs)<br>$C_1 - ^2A$                                                                                                                                                                                                                                                                                                                                                                                                                                            |
|-------------------------------------------------------------------------------------------------------------------------------------------------------------------------------------------------------------------------------------------------------------------------------------------------------------------------------------------------------------------------------------------------------------------------------------------------------------------------------------------------------------------------|----------------------------------------------------------------------------------------------------------------------------------------------------------------------------------------------------------------------------------------------------------------------------------------------------------------------------------------------------------------------------------------------------------------------------------------------------------------------------------------------------------------------------------|-----------------------------------------------------------------------------------------------------------------------------------------------------------------------------------------------------------------------------------------------------------------------------------------------------------------------------------------------------------------------------------------------------------------------------------------------------------------------------------------------------------------------|------------------------------------------------------------------------------------------------------------------------------------------------------------------------------------------------------------------------------------------------------------------------------------------------------------------------------------------------------------------------------------------------------------------------------------------------------------------------|
| Vibrational frequencies ( $\text{cm}^{-1}$ )                                                                                                                                                                                                                                                                                                                                                                                                                                                                            | Vibrational frequencies ( $\text{cm}^{-1}$ )                                                                                                                                                                                                                                                                                                                                                                                                                                                                                     | Vibrational frequencies ( $\text{cm}^{-1}$ )                                                                                                                                                                                                                                                                                                                                                                                                                                                                          | Vibrational frequencies ( $\text{cm}^{-1}$ )                                                                                                                                                                                                                                                                                                                                                                                                                           |
| 21, 32, 44, 52, 67, 75, 100, 108, 119, 130, 141, 149, 169, 181, 193, 205, 224, 231, 243, 254, 270, 291, 330, 354, 365, 388, 400, 411, 428, 467, 497, 526, 539, 615, 652, 678, 685, 707, 729, 734, 795, 811, 816, 830, 846, 921, 933, 1002, 1010, 1041, 1045, 1053, 1103, 1119, 1125, 1168, 1180, 1185, 1190, 1202, 1207, 1236, 1312, 1332, 1350, 1396, 1433, 1455, 1479, 1481, 1483, 1487, 1491, 1501, 1510, 1510, 1688, 1688, 1766, 1856, 3080, 3091, 3138, 3172, 3179, 3204, 3206, 3219, 3233, 3240, 3246, 3251, 3697 | <b>1071i</b> , 17, 28, 37, 45, 66, 95, 101, 115, 133, 142, 144, 153, 173, 183, 194, 198, 228, 246, 265, 291, 306, 332, 358, 387, 395, 410, 424, 466, 495, 525, 540, 616, 648, 678, 685, 707, 729, 734, 764, 783, 794, 811, 835, 845, 920, 932, 973, 1001, 1011, 1040, 1047, 1089, 1103, 1122, 1146, 1169, 1178, 1191, 1202, 1206, 1232, 1236, 1312, 1325, 1347, 1365, 1398, 1433, 1452, 1452, 1479, 1484, 1490, 1493, 1511, 1511, 1689, 1690, 1767, 1856, 3091, 3109, 3137, 3181, 3206, 3208, 3221, 3232, 3240, 3246, 3251, 3700 | 23, 28, 47, 61, 65, 74, 101, 103, 115, 133, 140, 148, 179, 182, 195, 204, 214, 234, 241, 247, 251, 277, 299, 328, 357, 366, 389, 395, 403, 409, 424, 463, 497, 528, 540, 615, 651, 675, 687, 708, 730, 730, 788, 792, 808, 835, 849, 921, 936, 1001, 1011, 1038, 1045, 1079, 1102, 1129, 1167, 1168, 1182, 1190, 1204, 1213, 1235, 1310, 1332, 1356, 1398, 1436, 1457, 1476, 1483, 1487, 1489, 1509, 1510, 1611, 1688, 1690, 1767, 1855, 3092, 3136, 3183, 3194, 3207, 3222, 3233, 3240, 3246, 3252, 3354, 3782, 3888 | 27, 45, 55, 62, 93, 106, 122, 137, 144, 153, 178, 188, 192, 219, 233, 245, 270, 293, 304, 328, 357, 388, 398, 409, 423, 464, 495, 526, 539, 615, 656, 675, 687, 708, 729, 730, 788, 791, 808, 835, 846, 923, 932, 1002, 1010, 1037, 1046, 1080, 1102, 1122, 1163, 1168, 1181, 1190, 1204, 1209, 1235, 1311, 1325, 1346, 1397, 1433, 1454, 1472, 1482, 1485, 1489, 1510, 1510, 1688, 1689, 1767, 1855, 3092, 3135, 3183, 3195, 3204, 3220, 3233, 3241, 3247, 3252, 3358 |
| Rotational constants (GHz)                                                                                                                                                                                                                                                                                                                                                                                                                                                                                              | Rotational constants (GHz)                                                                                                                                                                                                                                                                                                                                                                                                                                                                                                       | Rotational constants (GHz)                                                                                                                                                                                                                                                                                                                                                                                                                                                                                            | Rotational constants (GHz)                                                                                                                                                                                                                                                                                                                                                                                                                                             |
| 0.45168, 0.20557, 0.18487                                                                                                                                                                                                                                                                                                                                                                                                                                                                                               | 0.42298, 0.20277, 0.18124                                                                                                                                                                                                                                                                                                                                                                                                                                                                                                        | 0.41724, 0.20034, 0.17795                                                                                                                                                                                                                                                                                                                                                                                                                                                                                             | 0.57451, 0.20866, 0.20428                                                                                                                                                                                                                                                                                                                                                                                                                                              |

**Table S79.** Vibrational frequencies and rotational constants for the stationary points involved in the C1-addition pathway in gas phase calculated at the M06-2X/6-31+G(d,p) level of theory.

| MCR(C1-add)<br>C <sub>1</sub> - <sup>2</sup> A                                                                                                                                                                                                                                                                                                                                                                                                                                                                        | TS(C1-add)<br>C <sub>1</sub> - <sup>2</sup> A                                                                                                                                                                                                                                                                                                                                                                                                                                                                                   | Adduct(C1-add)<br>C <sub>1</sub> - <sup>2</sup> A                                                                                                                                                                                                                                                                                                                                                                                                                                                                       |
|-----------------------------------------------------------------------------------------------------------------------------------------------------------------------------------------------------------------------------------------------------------------------------------------------------------------------------------------------------------------------------------------------------------------------------------------------------------------------------------------------------------------------|---------------------------------------------------------------------------------------------------------------------------------------------------------------------------------------------------------------------------------------------------------------------------------------------------------------------------------------------------------------------------------------------------------------------------------------------------------------------------------------------------------------------------------|-------------------------------------------------------------------------------------------------------------------------------------------------------------------------------------------------------------------------------------------------------------------------------------------------------------------------------------------------------------------------------------------------------------------------------------------------------------------------------------------------------------------------|
| Vibrational frequencies (cm <sup>-1</sup> )                                                                                                                                                                                                                                                                                                                                                                                                                                                                           | Vibrational frequencies (cm <sup>-1</sup> )                                                                                                                                                                                                                                                                                                                                                                                                                                                                                     | Vibrational frequencies (cm <sup>-1</sup> )                                                                                                                                                                                                                                                                                                                                                                                                                                                                             |
| 12, 19, 31, 46, 66, 72, 98, 112, 119, 127, 138, 154, 167, 181, 191, 199, 205, 210, 231, 244, 272, 292, 334, 359, 388, 398, 410, 427, 433, 467, 491, 524, 540, 614, 648, 677, 686, 706, 728, 734, 794, 811, 817, 831, 846, 919, 933, 999, 1009, 1035, 1043, 1055, 1102, 1118, 1121, 1166, 1181, 1183, 1190, 1201, 1207, 1234, 1310, 1326, 1344, 1393, 1431, 1453, 1478, 1482, 1484, 1485, 1490, 1498, 1507, 1509, 1684, 1687, 1767, 1856, 3080, 3087, 3137, 3173, 3176, 3202, 3206, 3214, 3233, 3241, 3247, 3251, 3702 | <b>488i</b> , 17, 43, 55, 69, 85, 87, 108, 118, 129, 139, 163, 168, 182, 188, 199, 208, 219, 238, 249, 271, 297, 334, 358, 383, 394, 406, 426, 443, 491, 520, 541, 614, 646, 648, 684, 705, 724, 743, 789, 813, 816, 831, 839, 851, 917, 934, 974, 1000, 1017, 1035, 1056, 1098, 1120, 1125, 1161, 1180, 1182, 1187, 1201, 1205, 1224, 1307, 1326, 1354, 1386, 1432, 1455, 1479, 1481, 1482, 1483, 1483, 1490, 1496, 1500, 1635, 1664, 1768, 1856, 3080, 3089, 3137, 3173, 3177, 3202, 3206, 3217, 3244, 3249, 3254, 3260, 3762 | 30, 35, 49, 75, 84, 98, 108, 115, 140, 151, 161, 178, 183, 193, 206, 217, 237, 271, 295, 318, 335, 343, 369, 380, 394, 425, 435, 460, 491, 513, 532, 607, 629, 650, 672, 690, 712, 750, 758, 788, 816, 827, 834, 871, 915, 929, 994, 1007, 1054, 1057, 1080, 1120, 1123, 1143, 1172, 1179, 1183, 1200, 1207, 1223, 1235, 1295, 1324, 1348, 1354, 1384, 1417, 1432, 1448, 1472, 1477, 1481, 1484, 1487, 1492, 1494, 1562, 1697, 1737, 1823, 3044, 3082, 3089, 3136, 3173, 3178, 3204, 3205, 3217, 3230, 3233, 3244, 3815 |
| Rotational constants (GHz)                                                                                                                                                                                                                                                                                                                                                                                                                                                                                            | Rotational constants (GHz)                                                                                                                                                                                                                                                                                                                                                                                                                                                                                                      | Rotational constants (GHz)                                                                                                                                                                                                                                                                                                                                                                                                                                                                                              |
| 0.52451, 0.17135, 0.16922                                                                                                                                                                                                                                                                                                                                                                                                                                                                                             | 0.53338, 0.17292, 0.17024                                                                                                                                                                                                                                                                                                                                                                                                                                                                                                       | 0.53094, 0.17081, 0.16652                                                                                                                                                                                                                                                                                                                                                                                                                                                                                               |



**Table S80.** Vibrational frequencies and rotational constants for the stationary points involved in the C2-addition pathway in aqueous phase calculated at the M06-2X/6-31+G(d,p) level of theory.

| MCR(C2-add)<br>C <sub>1</sub> - <sup>2</sup> A                                                                                                                                                                                                                                                                                                                                                                                                                                                                          | TS(C2-add)<br>C <sub>1</sub> - <sup>2</sup> A                                                                                                                                                                                                                                                                                                                                                                                                                                                                                   | Adduct(C2-add)<br>C <sub>1</sub> - <sup>2</sup> A                                                                                                                                                                                                                                                                                                                                                                                                                                                                         |
|-------------------------------------------------------------------------------------------------------------------------------------------------------------------------------------------------------------------------------------------------------------------------------------------------------------------------------------------------------------------------------------------------------------------------------------------------------------------------------------------------------------------------|---------------------------------------------------------------------------------------------------------------------------------------------------------------------------------------------------------------------------------------------------------------------------------------------------------------------------------------------------------------------------------------------------------------------------------------------------------------------------------------------------------------------------------|---------------------------------------------------------------------------------------------------------------------------------------------------------------------------------------------------------------------------------------------------------------------------------------------------------------------------------------------------------------------------------------------------------------------------------------------------------------------------------------------------------------------------|
| Vibrational frequencies (cm <sup>-1</sup> )                                                                                                                                                                                                                                                                                                                                                                                                                                                                             | Vibrational frequencies (cm <sup>-1</sup> )                                                                                                                                                                                                                                                                                                                                                                                                                                                                                     | Vibrational frequencies (cm <sup>-1</sup> )                                                                                                                                                                                                                                                                                                                                                                                                                                                                               |
| 28, 43, 57, 78, 83, 109, 111, 116, 126, 138, 151, 154, 158, 168, 186, 189, 199, 237, 240, 274, 285, 319, 356, 390, 395, 408, 433, 464, 486, 511, 518, 535, 542, 616, 654, 676, 679, 711, 729, 730, 792, 803, 810, 836, 853, 918, 934, 997, 1015, 1036, 1045, 1054, 1102, 1120, 1122, 1168, 1178, 1183, 1190, 1204, 1208, 1236, 1309, 1323, 1351, 1397, 1440, 1463, 1478, 1481, 1484, 1484, 1486, 1499, 1508, 1509, 1685, 1688, 1769, 1857, 3089, 3090, 3135, 3178, 3186, 3204, 3207, 3217, 3232, 3240, 3246, 3251, 3608 | <b>519i</b> , 25, 54, 63, 72, 82, 90, 111, 114, 118, 134, 155, 162, 179, 188, 196, 204, 211, 233, 249, 273, 290, 328, 357, 384, 393, 412, 427, 462, 491, 523, 536, 614, 644, 649, 687, 708, 725, 746, 790, 810, 816, 819, 830, 844, 928, 937, 976, 1007, 1031, 1040, 1052, 1094, 1117, 1125, 1167, 1176, 1180, 1182, 1199, 1205, 1234, 1304, 1327, 1352, 1391, 1433, 1455, 1470, 1478, 1479, 1485, 1487, 1491, 1497, 1506, 1643, 1652, 1769, 1857, 3081, 3088, 3135, 3172, 3177, 3204, 3214, 3217, 3238, 3246, 3252, 3255, 3772 | 35, 42, 65, 93, 96, 103, 115, 134, 143, 158, 161, 173, 174, 186, 187, 208, 232, 270, 279, 304, 323, 352, 372, 390, 399, 419, 426, 469, 488, 523, 538, 579, 620, 650, 669, 687, 704, 743, 757, 800, 816, 834, 840, 890, 917, 932, 1010, 1025, 1035, 1059, 1067, 1113, 1123, 1124, 1172, 1178, 1181, 1200, 1204, 1217, 1243, 1282, 1324, 1348, 1380, 1403, 1410, 1435, 1456, 1472, 1475, 1480, 1481, 1483, 1487, 1490, 1570, 1635, 1748, 1833, 3050, 3088, 3090, 3137, 3177, 3181, 3203, 3210, 3216, 3225, 3240, 3253, 3812 |
| Rotational constants (GHz)                                                                                                                                                                                                                                                                                                                                                                                                                                                                                              | Rotational constants (GHz)                                                                                                                                                                                                                                                                                                                                                                                                                                                                                                      | Rotational constants (GHz)                                                                                                                                                                                                                                                                                                                                                                                                                                                                                                |
| 0.45497, 0.22464, 0.22034                                                                                                                                                                                                                                                                                                                                                                                                                                                                                               | 0.48688, 0.20302, 0.19065                                                                                                                                                                                                                                                                                                                                                                                                                                                                                                       |                                                                                                                                                                                                                                                                                                                                                                                                                                                                                                                           |

**Table S81.** Vibrational frequencies and rotational constants for the stationary points involved in the C3-addition pathway in aqueous phase calculated at the M06-2X/6-31+G(d,p) level of theory.

| MCR(C3-add)<br>$C_1 - ^2A$                                                                                                                                                                                                                                                                                                                                                                                                                                                                                             | TS(C3-add)<br>$C_1 - ^2A$                                                                                                                                                                                                                                                                                                                                                                                                                                                                                                       | Adduct(C3-add)<br>$C_1 - ^2A$                                                                                                                                                                                                                                                                                                                                                                                                                                                                                            |
|------------------------------------------------------------------------------------------------------------------------------------------------------------------------------------------------------------------------------------------------------------------------------------------------------------------------------------------------------------------------------------------------------------------------------------------------------------------------------------------------------------------------|---------------------------------------------------------------------------------------------------------------------------------------------------------------------------------------------------------------------------------------------------------------------------------------------------------------------------------------------------------------------------------------------------------------------------------------------------------------------------------------------------------------------------------|--------------------------------------------------------------------------------------------------------------------------------------------------------------------------------------------------------------------------------------------------------------------------------------------------------------------------------------------------------------------------------------------------------------------------------------------------------------------------------------------------------------------------|
| Vibrational frequencies ( $\text{cm}^{-1}$ )                                                                                                                                                                                                                                                                                                                                                                                                                                                                           | Vibrational frequencies ( $\text{cm}^{-1}$ )                                                                                                                                                                                                                                                                                                                                                                                                                                                                                    | Vibrational frequencies ( $\text{cm}^{-1}$ )                                                                                                                                                                                                                                                                                                                                                                                                                                                                             |
| 20, 26, 34, 47, 64, 80, 98, 104, 120, 125, 139, 148, 169, 180, 183, 190, 200, 207, 232, 246, 271, 298, 332, 358, 387, 397, 412, 426, 448, 469, 491, 525, 539, 615, 648, 679, 688, 706, 729, 734, 792, 810, 817, 828, 846, 919, 934, 1000, 1010, 1039, 1045, 1056, 1103, 1120, 1126, 1170, 1182, 1186, 1190, 1201, 1205, 1234, 1312, 1331, 1352, 1398, 1434, 1454, 1480, 1481, 1485, 1486, 1491, 1498, 1507, 1510, 1685, 1688, 1766, 1856, 3080, 3089, 3138, 3173, 3177, 3205, 3206, 3216, 3233, 3241, 3247, 3252, 3726 | <b>482i</b> , 28, 43, 50, 60, 89, 99, 112, 121, 125, 135, 138, 161, 179, 183, 187, 198, 226, 236, 247, 273, 295, 336, 357, 381, 389, 401, 427, 452, 492, 524, 536, 614, 646, 649, 684, 710, 715, 734, 767, 793, 799, 814, 830, 845, 911, 933, 994, 1002, 1034, 1042, 1055, 1104, 1120, 1125, 1163, 1179, 1182, 1185, 1201, 1205, 1225, 1310, 1326, 1349, 1384, 1431, 1455, 1474, 1478, 1480, 1485, 1489, 1489, 1497, 1502, 1627, 1664, 1771, 1864, 3080, 3089, 3137, 3174, 3178, 3199, 3205, 3218, 3238, 3245, 3250, 3255, 3767 | 38, 57, 65, 73, 89, 105, 120, 126, 138, 160, 172, 184, 197, 203, 219, 231, 263, 274, 286, 303, 330, 343, 355, 387, 398, 413, 428, 481, 497, 522, 526, 602, 613, 649, 669, 696, 715, 736, 765, 787, 816, 830, 839, 859, 926, 957, 967, 1003, 1007, 1047, 1054, 1086, 1107, 1118, 1132, 1159, 1172, 1182, 1187, 1201, 1206, 1274, 1323, 1338, 1344, 1356, 1400, 1426, 1434, 1452, 1477, 1480, 1487, 1488, 1491, 1502, 1569, 1642, 1747, 1848, 3082, 3089, 3138, 3174, 3177, 3207, 3211, 3217, 3229, 3231, 3242, 3255, 3804 |
| Rotational constants (GHz)                                                                                                                                                                                                                                                                                                                                                                                                                                                                                             | Rotational constants (GHz)                                                                                                                                                                                                                                                                                                                                                                                                                                                                                                      | Rotational constants (GHz)                                                                                                                                                                                                                                                                                                                                                                                                                                                                                               |
| 0.50257, 0.18607, 0.18159                                                                                                                                                                                                                                                                                                                                                                                                                                                                                              | 0.49390, 0.20015, 0.19420                                                                                                                                                                                                                                                                                                                                                                                                                                                                                                       | 0.48499, 0.20914, 0.20192                                                                                                                                                                                                                                                                                                                                                                                                                                                                                                |

**Table S82.** Vibrational frequencies and rotational constants for the stationary points involved in the C4-addition pathway in aqueous phase calculated at the M06-2X/6-31+G(d,p) level of theory.

| MCR(C4-add)<br>C <sub>1</sub> - <sup>2</sup> A                                                                                                                                                                                                                                                                                                                                                                                                                                                                         | TS(C4-add)<br>C <sub>1</sub> - <sup>2</sup> A                                                                                                                                                                                                                                                                                                                                                                                                                                                                             | Adduct(C4-add)<br>C <sub>1</sub> - <sup>2</sup> A                                                                                                                                                                                                                                                                                                                                                                                                                                                                        |
|------------------------------------------------------------------------------------------------------------------------------------------------------------------------------------------------------------------------------------------------------------------------------------------------------------------------------------------------------------------------------------------------------------------------------------------------------------------------------------------------------------------------|---------------------------------------------------------------------------------------------------------------------------------------------------------------------------------------------------------------------------------------------------------------------------------------------------------------------------------------------------------------------------------------------------------------------------------------------------------------------------------------------------------------------------|--------------------------------------------------------------------------------------------------------------------------------------------------------------------------------------------------------------------------------------------------------------------------------------------------------------------------------------------------------------------------------------------------------------------------------------------------------------------------------------------------------------------------|
| Vibrational frequencies (cm <sup>-1</sup> )                                                                                                                                                                                                                                                                                                                                                                                                                                                                            | Vibrational frequencies (cm <sup>-1</sup> )                                                                                                                                                                                                                                                                                                                                                                                                                                                                               | Vibrational frequencies (cm <sup>-1</sup> )                                                                                                                                                                                                                                                                                                                                                                                                                                                                              |
| 22, 34, 44, 47, 65, 91, 103, 111, 121, 124, 143, 149, 167, 181, 192, 201, 202, 214, 233, 245, 268, 298, 329, 358, 386, 396, 410, 425, 466, 493, 495, 524, 539, 615, 649, 676, 688, 707, 728, 732, 791, 807, 817, 830, 845, 918, 933, 998, 1010, 1037, 1045, 1056, 1101, 1120, 1125, 1168, 1181, 1184, 1190, 1200, 1205, 1233, 1310, 1327, 1352, 1398, 1434, 1456, 1478, 1481, 1484, 1485, 1492, 1496, 1507, 1508, 1685, 1687, 1765, 1855, 3082, 3090, 3138, 3174, 3179, 3205, 3207, 3217, 3233, 3240, 3246, 3251, 3727 | <b>482i</b> , 30, 45, 59, 84, 92, 96, 115, 119, 128, 143, 144, 167, 171, 183, 187, 200, 210, 233, 248, 271, 295, 334, 356, 381, 389, 399, 426, 453, 492, 524, 538, 614, 646, 650, 687, 702, 715, 742, 777, 797, 815, 817, 831, 846, 912, 932, 994, 1002, 1034, 1042, 1055, 1103, 1120, 1126, 1163, 1181, 1183, 1185, 1200, 1205, 1223, 1309, 1326, 1349, 1384, 1432, 1456, 1473, 1477, 1481, 1483, 1484, 1492, 1502, 1626, 1665, 1771, 1861, 3080, 3090, 3139, 3174, 3179, 3200, 3207, 3217, 3238, 3244, 3250, 3255, 3765 | 44, 52, 54, 88, 91, 106, 113, 123, 140, 160, 167, 178, 195, 204, 212, 230, 251, 270, 275, 290, 301, 340, 355, 388, 396, 412, 426, 481, 495, 519, 528, 599, 613, 651, 674, 691, 705, 742, 764, 795, 817, 830, 842, 858, 925, 955, 964, 1003, 1007, 1051, 1055, 1085, 1108, 1120, 1131, 1155, 1173, 1181, 1183, 1199, 1206, 1271, 1324, 1337, 1344, 1354, 1401, 1427, 1430, 1452, 1474, 1481, 1484, 1488, 1492, 1502, 1571, 1643, 1752, 1844, 3080, 3089, 3136, 3170, 3178, 3205, 3207, 3218, 3228, 3230, 3241, 3255, 3799 |
| Rotational constants (GHz)                                                                                                                                                                                                                                                                                                                                                                                                                                                                                             | Rotational constants (GHz)                                                                                                                                                                                                                                                                                                                                                                                                                                                                                                | Rotational constants (GHz)                                                                                                                                                                                                                                                                                                                                                                                                                                                                                               |
| 0.51921, 0.18288, 0.17540                                                                                                                                                                                                                                                                                                                                                                                                                                                                                              | 0.50895, 0.19672, 0.18792                                                                                                                                                                                                                                                                                                                                                                                                                                                                                                 | 0.50364, 0.20401, 0.19329                                                                                                                                                                                                                                                                                                                                                                                                                                                                                                |

**Table S83.** Vibrational frequencies and rotational constants for the stationary points involved in the C5-addition pathway in aqueous phase calculated at the M06-2X/6-31+G(d,p) level of theory.

| MCR(C5-add)<br>C <sub>1</sub> - <sup>2</sup> A                                                                                                                                                                                                                                                                                                                                                                                                                                                                         | TS(C5-add)<br>C <sub>1</sub> - <sup>2</sup> A                                                                                                                                                                                                                                                                                                                                                                                                                                                                                   | Adduct(C5-add)<br>C <sub>1</sub> - <sup>2</sup> A                                                                                                                                                                                                                                                                                                                                                                                                                                                                        |
|------------------------------------------------------------------------------------------------------------------------------------------------------------------------------------------------------------------------------------------------------------------------------------------------------------------------------------------------------------------------------------------------------------------------------------------------------------------------------------------------------------------------|---------------------------------------------------------------------------------------------------------------------------------------------------------------------------------------------------------------------------------------------------------------------------------------------------------------------------------------------------------------------------------------------------------------------------------------------------------------------------------------------------------------------------------|--------------------------------------------------------------------------------------------------------------------------------------------------------------------------------------------------------------------------------------------------------------------------------------------------------------------------------------------------------------------------------------------------------------------------------------------------------------------------------------------------------------------------|
| Vibrational frequencies (cm <sup>-1</sup> )                                                                                                                                                                                                                                                                                                                                                                                                                                                                            | Vibrational frequencies (cm <sup>-1</sup> )                                                                                                                                                                                                                                                                                                                                                                                                                                                                                     | Vibrational frequencies (cm <sup>-1</sup> )                                                                                                                                                                                                                                                                                                                                                                                                                                                                              |
| 22, 33, 45, 47, 65, 90, 102, 111, 121, 124, 142, 149, 166, 180, 191, 197, 200, 214, 233, 245, 268, 298, 329, 358, 386, 396, 410, 424, 466, 488, 493, 525, 539, 615, 649, 676, 688, 707, 728, 732, 791, 807, 817, 830, 845, 918, 934, 998, 1010, 1037, 1045, 1056, 1101, 1120, 1126, 1168, 1181, 1184, 1190, 1200, 1205, 1233, 1310, 1328, 1352, 1398, 1434, 1456, 1478, 1481, 1483, 1485, 1492, 1496, 1507, 1508, 1685, 1687, 1765, 1855, 3082, 3090, 3138, 3174, 3179, 3205, 3207, 3217, 3233, 3240, 3246, 3251, 3727 | <b>500i</b> , 21, 46, 58, 71, 80, 92, 111, 120, 128, 142, 157, 170, 182, 196, 203, 221, 232, 240, 248, 269, 289, 333, 356, 384, 394, 412, 426, 461, 492, 522, 537, 613, 647, 648, 686, 707, 726, 739, 795, 808, 815, 820, 830, 845, 930, 939, 980, 1006, 1030, 1040, 1055, 1093, 1119, 1124, 1167, 1177, 1180, 1186, 1203, 1207, 1228, 1303, 1332, 1350, 1386, 1432, 1456, 1478, 1480, 1482, 1487, 1487, 1491, 1499, 1503, 1642, 1654, 1768, 1857, 3080, 3089, 3139, 3173, 3178, 3204, 3207, 3218, 3239, 3246, 3253, 3257, 3769 | 22, 42, 49, 76, 79, 96, 109, 117, 136, 154, 165, 170, 173, 184, 199, 216, 226, 270, 296, 309, 330, 355, 379, 385, 396, 425, 427, 465, 488, 508, 539, 581, 624, 648, 680, 693, 702, 743, 763, 804, 817, 825, 836, 892, 913, 932, 1011, 1021, 1031, 1057, 1063, 1117, 1122, 1123, 1173, 1179, 1183, 1198, 1206, 1215, 1236, 1285, 1324, 1345, 1378, 1404, 1412, 1432, 1447, 1464, 1476, 1482, 1482, 1485, 1491, 1493, 1571, 1635, 1740, 1833, 3065, 3078, 3089, 3136, 3170, 3177, 3204, 3205, 3216, 3226, 3240, 3255, 3809 |
| Rotational constants (GHz)                                                                                                                                                                                                                                                                                                                                                                                                                                                                                             | Rotational constants (GHz)                                                                                                                                                                                                                                                                                                                                                                                                                                                                                                      | Rotational constants (GHz)                                                                                                                                                                                                                                                                                                                                                                                                                                                                                               |
| 0.51955, 0.18274, 0.17524                                                                                                                                                                                                                                                                                                                                                                                                                                                                                              | 0.53479, 0.18005, 0.17447                                                                                                                                                                                                                                                                                                                                                                                                                                                                                                       | 0.53115, 0.18070, 0.17486                                                                                                                                                                                                                                                                                                                                                                                                                                                                                                |

**Table S84.** Vibrational frequencies and rotational constants for the stationary points involved in the C6-addition pathway in aqueous phase calculated at the M06-2X/6-31+G(d,p) level of theory.

| MCR(C6-add)<br>$C_1 - ^2A$                                                                                                                                                                                                                                                                                                                                                                                                                                                                                            | TS(C6-add)<br>$C_1 - ^2A$                                                                                                                                                                                                                                                                                                                                                                                                                                                                                                       | Adduct(C6-add)<br>$C_1 - ^2A$                                                                                                                                                                                                                                                                                                                                                                                                                                                                                            |
|-----------------------------------------------------------------------------------------------------------------------------------------------------------------------------------------------------------------------------------------------------------------------------------------------------------------------------------------------------------------------------------------------------------------------------------------------------------------------------------------------------------------------|---------------------------------------------------------------------------------------------------------------------------------------------------------------------------------------------------------------------------------------------------------------------------------------------------------------------------------------------------------------------------------------------------------------------------------------------------------------------------------------------------------------------------------|--------------------------------------------------------------------------------------------------------------------------------------------------------------------------------------------------------------------------------------------------------------------------------------------------------------------------------------------------------------------------------------------------------------------------------------------------------------------------------------------------------------------------|
| Vibrational frequencies ( $\text{cm}^{-1}$ )                                                                                                                                                                                                                                                                                                                                                                                                                                                                          | Vibrational frequencies ( $\text{cm}^{-1}$ )                                                                                                                                                                                                                                                                                                                                                                                                                                                                                    | Vibrational frequencies ( $\text{cm}^{-1}$ )                                                                                                                                                                                                                                                                                                                                                                                                                                                                             |
| 26, 27, 37, 60, 83, 86, 95, 110, 112, 131, 134, 142, 155, 170, 183, 192, 208, 227, 245, 255, 271, 293, 329, 358, 385, 397, 410, 424, 467, 485, 496, 525, 539, 615, 650, 677, 691, 707, 730, 734, 792, 810, 817, 830, 843, 919, 932, 999, 1009, 1036, 1044, 1059, 1102, 1123, 1126, 1168, 1181, 1184, 1190, 1204, 1218, 1234, 1311, 1328, 1346, 1395, 1433, 1452, 1474, 1482, 1487, 1491, 1495, 1503, 1508, 1509, 1685, 1687, 1765, 1854, 3080, 3090, 3137, 3170, 3179, 3205, 3205, 3217, 3234, 3242, 3248, 3253, 3760 | <b>486i</b> , 36, 43, 57, 64, 90, 98, 106, 125, 130, 131, 139, 171, 172, 184, 194, 225, 230, 241, 247, 270, 300, 332, 358, 388, 398, 401, 424, 450, 492, 523, 539, 613, 645, 650, 689, 706, 725, 747, 790, 817, 829, 837, 841, 862, 918, 936, 974, 1000, 1018, 1035, 1058, 1097, 1122, 1127, 1161, 1181, 1186, 1188, 1205, 1219, 1224, 1307, 1325, 1353, 1386, 1433, 1456, 1476, 1481, 1482, 1485, 1491, 1493, 1500, 1507, 1635, 1664, 1767, 1854, 3083, 3090, 3139, 3174, 3178, 3208, 3209, 3217, 3243, 3249, 3253, 3260, 3789 | 24, 42, 65, 73, 78, 109, 120, 127, 143, 146, 162, 175, 184, 194, 208, 218, 234, 269, 300, 324, 337, 345, 380, 392, 396, 425, 428, 471, 489, 506, 532, 603, 626, 648, 668, 692, 712, 743, 764, 789, 816, 822, 833, 868, 916, 929, 994, 1005, 1058, 1061, 1086, 1120, 1123, 1143, 1169, 1181, 1184, 1201, 1207, 1221, 1234, 1297, 1320, 1347, 1349, 1382, 1417, 1430, 1452, 1471, 1478, 1481, 1481, 1487, 1492, 1498, 1559, 1699, 1740, 1819, 3029, 3078, 3091, 3137, 3171, 3179, 3202, 3206, 3218, 3230, 3234, 3244, 3823 |
| Rotational constants (GHz)                                                                                                                                                                                                                                                                                                                                                                                                                                                                                            | Rotational constants (GHz)                                                                                                                                                                                                                                                                                                                                                                                                                                                                                                      | Rotational constants (GHz)                                                                                                                                                                                                                                                                                                                                                                                                                                                                                               |
| 0.48511, 0.18051, 0.17189                                                                                                                                                                                                                                                                                                                                                                                                                                                                                             | 0.49333, 0.18393, 0.17591                                                                                                                                                                                                                                                                                                                                                                                                                                                                                                       | 0.50883, 0.17590, 0.17119                                                                                                                                                                                                                                                                                                                                                                                                                                                                                                |

**Table S85.** Vibrational frequencies and rotational constants for the stationary points involved in the C7-addition pathway in aqueous phase calculated at the M06-2X/6-31+G(d,p) level of theory.

| MCR(C7-add)<br>C <sub>1</sub> - <sup>2</sup> A                                                                                                                                                                                                                                                                                                                                                                                                                                                                        | TS(C7-add)<br>C <sub>1</sub> - <sup>2</sup> A                                                                                                                                                                                                                                                                                                                                                                                                                                                                                     | Adduct(C7-add)<br>C <sub>1</sub> - <sup>2</sup> A                                                                                                                                                                                                                                                                                                                                                                                                                                                                         |
|-----------------------------------------------------------------------------------------------------------------------------------------------------------------------------------------------------------------------------------------------------------------------------------------------------------------------------------------------------------------------------------------------------------------------------------------------------------------------------------------------------------------------|-----------------------------------------------------------------------------------------------------------------------------------------------------------------------------------------------------------------------------------------------------------------------------------------------------------------------------------------------------------------------------------------------------------------------------------------------------------------------------------------------------------------------------------|---------------------------------------------------------------------------------------------------------------------------------------------------------------------------------------------------------------------------------------------------------------------------------------------------------------------------------------------------------------------------------------------------------------------------------------------------------------------------------------------------------------------------|
| Vibrational frequencies (cm <sup>-1</sup> )                                                                                                                                                                                                                                                                                                                                                                                                                                                                           | Vibrational frequencies (cm <sup>-1</sup> )                                                                                                                                                                                                                                                                                                                                                                                                                                                                                       | Vibrational frequencies (cm <sup>-1</sup> )                                                                                                                                                                                                                                                                                                                                                                                                                                                                               |
| 26, 30, 44, 49, 66, 71, 93, 102, 119, 125, 136, 151, 178, 180, 182, 195, 200, 212, 233, 246, 271, 302, 333, 358, 388, 398, 412, 418, 426, 471, 492, 526, 540, 616, 650, 680, 688, 708, 730, 733, 796, 808, 817, 830, 847, 916, 934, 997, 1010, 1036, 1045, 1057, 1102, 1121, 1124, 1167, 1178, 1182, 1190, 1201, 1206, 1236, 1311, 1326, 1351, 1397, 1436, 1457, 1479, 1481, 1484, 1486, 1489, 1496, 1510, 1511, 1688, 1690, 1763, 1853, 3080, 3088, 3137, 3173, 3176, 3205, 3205, 3216, 3232, 3238, 3245, 3251, 3731 | <b>638i</b> , 16, 42, 63, 72, 98, 104, 114, 118, 135, 147, 155, 172, 186, 193, 201, 237, 254, 271, 292, 309, 342, 352, 383, 396, 397, 421, 426, 473, 495, 526, 546, 610, 614, 649, 682, 700, 721, 728, 777, 808, 817, 828, 843, 900, 919, 943, 1000, 1018, 1038, 1048, 1057, 1103, 1121, 1125, 1167, 1180, 1184, 1187, 1201, 1206, 1238, 1310, 1321, 1347, 1391, 1432, 1457, 1479, 1481, 1484, 1485, 1490, 1495, 1501, 1513, 1541, 1690, 1692, 1799, 3079, 3088, 3131, 3171, 3176, 3200, 3201, 3217, 3231, 3238, 3243, 3250, 3728 | 28, 42, 65, 68, 89, 101, 108, 123, 134, 142, 158, 172, 186, 201, 209, 232, 261, 267, 277, 301, 325, 352, 375, 385, 396, 426, 427, 473, 496, 530, 550, 599, 621, 650, 678, 703, 719, 727, 785, 811, 815, 827, 848, 919, 929, 997, 1000, 1036, 1046, 1058, 1088, 1120, 1135, 1153, 1164, 1178, 1180, 1199, 1202, 1205, 1236, 1283, 1314, 1321, 1348, 1368, 1385, 1439, 1466, 1476, 1479, 1484, 1485, 1490, 1497, 1510, 1519, 1686, 1692, 1765, 3080, 3090, 3121, 3171, 3178, 3188, 3203, 3217, 3228, 3234, 3241, 3247, 3795 |
| Rotational constants (GHz)                                                                                                                                                                                                                                                                                                                                                                                                                                                                                            | Rotational constants (GHz)                                                                                                                                                                                                                                                                                                                                                                                                                                                                                                        | Rotational constants (GHz)                                                                                                                                                                                                                                                                                                                                                                                                                                                                                                |
| 0.45126, 0.19486, 0.18310                                                                                                                                                                                                                                                                                                                                                                                                                                                                                             | 0.48093, 0.19946, 0.19114                                                                                                                                                                                                                                                                                                                                                                                                                                                                                                         | 0.49801, 0.19860, 0.19055                                                                                                                                                                                                                                                                                                                                                                                                                                                                                                 |

**Table S86.** Vibrational frequencies and rotational constants for the stationary points involved in the C9-addition pathway in aqueous phase calculated at the M06-2X/6-31+G(d,p) level of theory.

| MCR(C9-add)<br>C <sub>1</sub> - <sup>2</sup> A                                                                                                                                                                                                                                                                                                                                                                                                                                                                         | TS(C9-add)<br>C <sub>1</sub> - <sup>2</sup> A                                                                                                                                                                                                                                                                                                                                                                                                                                                                                    | Adduct(C9-add)<br>C <sub>1</sub> - <sup>2</sup> A                                                                                                                                                                                                                                                                                                                                                                                                                                                                        |
|------------------------------------------------------------------------------------------------------------------------------------------------------------------------------------------------------------------------------------------------------------------------------------------------------------------------------------------------------------------------------------------------------------------------------------------------------------------------------------------------------------------------|----------------------------------------------------------------------------------------------------------------------------------------------------------------------------------------------------------------------------------------------------------------------------------------------------------------------------------------------------------------------------------------------------------------------------------------------------------------------------------------------------------------------------------|--------------------------------------------------------------------------------------------------------------------------------------------------------------------------------------------------------------------------------------------------------------------------------------------------------------------------------------------------------------------------------------------------------------------------------------------------------------------------------------------------------------------------|
| Vibrational frequencies (cm <sup>-1</sup> )                                                                                                                                                                                                                                                                                                                                                                                                                                                                            | Vibrational frequencies (cm <sup>-1</sup> )                                                                                                                                                                                                                                                                                                                                                                                                                                                                                      | Vibrational frequencies (cm <sup>-1</sup> )                                                                                                                                                                                                                                                                                                                                                                                                                                                                              |
| 18, 27, 40, 47, 66, 73, 92, 100, 106, 120, 121, 137, 157, 172, 181, 183, 193, 204, 234, 249, 272, 295, 330, 358, 384, 389, 397, 411, 425, 467, 491, 527, 540, 616, 650, 678, 689, 708, 730, 735, 794, 810, 818, 831, 846, 922, 934, 1002, 1012, 1039, 1047, 1057, 1103, 1121, 1124, 1169, 1180, 1184, 1191, 1202, 1207, 1236, 1312, 1329, 1349, 1399, 1435, 1454, 1479, 1480, 1484, 1486, 1491, 1496, 1511, 1512, 1690, 1691, 1760, 1853, 3080, 3090, 3134, 3172, 3178, 3203, 3205, 3217, 3232, 3239, 3244, 3251, 3732 | <b>647i</b> , 16, 46, 57, 71, 96, 104, 115, 120, 133, 146, 163, 184, 197, 201, 216, 229, 260, 269, 288, 305, 333, 347, 359, 387, 396, 419, 426, 472, 493, 524, 545, 609, 620, 649, 681, 702, 710, 728, 776, 804, 815, 827, 838, 898, 917, 945, 999, 1018, 1037, 1047, 1056, 1102, 1120, 1123, 1167, 1180, 1185, 1186, 1203, 1207, 1238, 1311, 1326, 1350, 1391, 1427, 1452, 1480, 1482, 1486, 1487, 1491, 1491, 1501, 1511, 1536, 1689, 1692, 1807, 3080, 3089, 3128, 3172, 3177, 3198, 3203, 3217, 3231, 3238, 3245, 3250, 3698 | 25, 43, 62, 64, 92, 103, 114, 127, 140, 143, 162, 166, 176, 195, 202, 229, 263, 268, 274, 313, 336, 356, 369, 393, 421, 425, 437, 481, 489, 521, 560, 601, 639, 658, 675, 698, 713, 733, 778, 807, 815, 828, 844, 913, 923, 977, 998, 1037, 1044, 1055, 1058, 1100, 1119, 1132, 1160, 1170, 1178, 1181, 1204, 1208, 1232, 1247, 1294, 1311, 1337, 1355, 1384, 1424, 1446, 1479, 1481, 1483, 1485, 1491, 1493, 1509, 1514, 1680, 1682, 1761, 3089, 3098, 3122, 3177, 3194, 3196, 3203, 3217, 3231, 3238, 3244, 3250, 3796 |
| Rotational constants (GHz)                                                                                                                                                                                                                                                                                                                                                                                                                                                                                             | Rotational constants (GHz)                                                                                                                                                                                                                                                                                                                                                                                                                                                                                                       | Rotational constants (GHz)                                                                                                                                                                                                                                                                                                                                                                                                                                                                                               |
| 0.46306, 0.19296, 0.17676                                                                                                                                                                                                                                                                                                                                                                                                                                                                                              | 0.48450, 0.20028, 0.18679                                                                                                                                                                                                                                                                                                                                                                                                                                                                                                        | 0.50786, 0.20188, 0.19396                                                                                                                                                                                                                                                                                                                                                                                                                                                                                                |

**Table S87.** Vibrational frequencies and rotational constants for the stationary points involved in the P12-addition pathway in gas phase calculated at the M06-2X/6-31+G(d,p) level of theory.

| MCR(P12-add)<br>$C_1 - ^2A$                                                                                                                                                                                                                                                                                                                                                                                                                                                                                            | TS(P12-add)<br>$C_1 - ^2A$                                                                                                                                                                                                                                                                                                                                                                                                                                                                                                        | MCP(P12-add)<br>$C_1 - ^2A$                                                                                                                                                                                                                                                                                                                                                                                                                                                                                           | Product1(P12-add)<br>$C_1 - ^2A$                                                                                                                                                                     | Product2(P12-add)<br>$C_1 - ^1A$                                                                                                                                                                                                                                                       |
|------------------------------------------------------------------------------------------------------------------------------------------------------------------------------------------------------------------------------------------------------------------------------------------------------------------------------------------------------------------------------------------------------------------------------------------------------------------------------------------------------------------------|-----------------------------------------------------------------------------------------------------------------------------------------------------------------------------------------------------------------------------------------------------------------------------------------------------------------------------------------------------------------------------------------------------------------------------------------------------------------------------------------------------------------------------------|-----------------------------------------------------------------------------------------------------------------------------------------------------------------------------------------------------------------------------------------------------------------------------------------------------------------------------------------------------------------------------------------------------------------------------------------------------------------------------------------------------------------------|------------------------------------------------------------------------------------------------------------------------------------------------------------------------------------------------------|----------------------------------------------------------------------------------------------------------------------------------------------------------------------------------------------------------------------------------------------------------------------------------------|
| Vibrational frequencies ( $cm^{-1}$ )                                                                                                                                                                                                                                                                                                                                                                                                                                                                                  | Vibrational frequencies ( $cm^{-1}$ )                                                                                                                                                                                                                                                                                                                                                                                                                                                                                             | Vibrational frequencies ( $cm^{-1}$ )                                                                                                                                                                                                                                                                                                                                                                                                                                                                                 | Vibrational frequencies ( $cm^{-1}$ )                                                                                                                                                                | Vibrational frequencies ( $cm^{-1}$ )                                                                                                                                                                                                                                                  |
| 19, 36, 52, 60, 69, 90, 99, 114, 125, 129, 145, 160, 169, 172, 184, 194, 212, 222, 243, 255, 276, 287, 330, 357, 383, 392, 411, 419, 465, 490, 524, 540, 613, 622, 677, 681, 697, 706, 729, 734, 794, 811, 822, 837, 845, 923, 933, 1003, 1011, 1040, 1047, 1057, 1104, 1118, 1118, 1169, 1178, 1181, 1191, 1203, 1207, 1237, 1312, 1324, 1344, 1399, 1432, 1452, 1480, 1483, 1484, 1486, 1487, 1490, 1512, 1512, 1689, 1691, 1767, 1856, 3084, 3092, 3139, 3179, 3183, 3208, 3209, 3222, 3232, 3239, 3245, 3251, 3805 | <b>215i</b> , 21, 43, 44, 57, 91, 103, 112, 127, 145, 151, 157, 175, 187, 195, 206, 236, 247, 294, 309, 319, 347, 366, 378, 399, 409, 415, 459, 466, 483, 523, 539, 576, 616, 677, 690, 709, 730, 735, 791, 792, 811, 825, 845, 848, 923, 933, 1003, 1009, 1039, 1046, 1063, 1103, 1113, 1119, 1168, 1176, 1180, 1191, 1202, 1207, 1236, 1312, 1324, 1345, 1397, 1432, 1457, 1478, 1482, 1484, 1485, 1488, 1491, 1510, 1511, 1689, 1690, 1763, 1853, 3081, 3089, 3138, 3176, 3178, 3206, 3206, 3218, 3232, 3240, 3246, 3251, 3813 | 28, 34, 43, 61, 66, 73, 78, 86, 107, 113, 148, 156, 162, 170, 174, 192, 202, 228, 238, 269, 297, 330, 339, 367, 395, 410, 415, 467, 482, 520, 539, 615, 623, 679, 691, 716, 729, 741, 779, 792, 808, 832, 839, 888, 902, 919, 999, 1004, 1037, 1037, 1044, 1059, 1102, 1105, 1126, 1167, 1182, 1185, 1189, 1207, 1211, 1233, 1300, 1311, 1340, 1395, 1413, 1454, 1479, 1482, 1486, 1491, 1494, 1495, 1509, 1510, 1689, 1690, 1754, 1848, 3089, 3091, 3097, 3164, 3179, 3180, 3204, 3210, 3231, 3238, 3244, 3250, 3813 | 61, 77, 124, 133, 164, 213, 239, 288, 329, 396, 420, 470, 616, 814, 834, 911, 1051, 1076, 1107, 1179, 1182, 1209, 1210, 1478, 1481, 1487, 1488, 1492, 1493, 3092, 3093, 3182, 3183, 3214, 3216, 3805 | 39, 50, 127, 138, 184, 237, 281, 343, 367, 413, 466, 524, 538, 619, 675, 680, 714, 733, 737, 741, 793, 811, 889, 921, 1002, 1006, 1040, 1046, 1076, 1103, 1170, 1189, 1232, 1310, 1321, 1337, 1398, 1403, 1449, 1510, 1511, 1689, 1690, 1756, 1848, 3110, 3154, 3232, 3240, 3247, 3251 |
| Rotational constants (GHz)                                                                                                                                                                                                                                                                                                                                                                                                                                                                                             | Rotational constants (GHz)                                                                                                                                                                                                                                                                                                                                                                                                                                                                                                        | Rotational constants (GHz)                                                                                                                                                                                                                                                                                                                                                                                                                                                                                            | Rotational constants (GHz)                                                                                                                                                                           | Rotational constants (GHz)                                                                                                                                                                                                                                                             |
| 0.48136, 0.19813, 0.18448                                                                                                                                                                                                                                                                                                                                                                                                                                                                                              | 0.50061, 0.19708, 0.18722                                                                                                                                                                                                                                                                                                                                                                                                                                                                                                         | 0.39418, 0.23316, 0.19162                                                                                                                                                                                                                                                                                                                                                                                                                                                                                             | 2.00720, 1.66892, 1.38915                                                                                                                                                                            | 1.50573, 0.49208, 0.39851                                                                                                                                                                                                                                                              |



**Table S88.** Vibrational frequencies and rotational constants for the stationary points involved in the S17-addition pathway in aqueous phase calculated at the M06-2X/6-31+G(d,p) level of theory.

| MCR(S17-add)<br>C <sub>1</sub> - <sup>2</sup> A                                                                                                                                                                                                                                                                                                                                                                                                                                                                         | TS(S17-add)<br>C <sub>1</sub> - <sup>2</sup> A                                                                                                                                                                                                                                                                                                                                                                                                                                                                                   | Adduct(S17-add)<br>C <sub>1</sub> - <sup>2</sup> A                                                                                                                                                                                                                                                                                                                                                                                                                                                                      |
|-------------------------------------------------------------------------------------------------------------------------------------------------------------------------------------------------------------------------------------------------------------------------------------------------------------------------------------------------------------------------------------------------------------------------------------------------------------------------------------------------------------------------|----------------------------------------------------------------------------------------------------------------------------------------------------------------------------------------------------------------------------------------------------------------------------------------------------------------------------------------------------------------------------------------------------------------------------------------------------------------------------------------------------------------------------------|-------------------------------------------------------------------------------------------------------------------------------------------------------------------------------------------------------------------------------------------------------------------------------------------------------------------------------------------------------------------------------------------------------------------------------------------------------------------------------------------------------------------------|
| Vibrational frequencies (cm <sup>-1</sup> )                                                                                                                                                                                                                                                                                                                                                                                                                                                                             | Vibrational frequencies (cm <sup>-1</sup> )                                                                                                                                                                                                                                                                                                                                                                                                                                                                                      | Vibrational frequencies (cm <sup>-1</sup> )                                                                                                                                                                                                                                                                                                                                                                                                                                                                             |
| 28, 44, 60, 87, 96, 97, 105, 116, 118, 136, 149, 163, 165, 177, 194, 209, 214, 236, 248, 263, 288, 303, 331, 358, 385, 391, 412, 418, 468, 488, 524, 540, 613, 625, 679, 680, 684, 707, 729, 735, 798, 810, 814, 827, 844, 924, 933, 1004, 1010, 1039, 1045, 1059, 1103, 1121, 1125, 1169, 1180, 1183, 1191, 1200, 1206, 1236, 1311, 1327, 1352, 1397, 1433, 1454, 1476, 1481, 1484, 1486, 1491, 1495, 1510, 1510, 1688, 1689, 1767, 1855, 3087, 3093, 3136, 3183, 3184, 3207, 3208, 3221, 3233, 3241, 3247, 3252, 3797 | <b>462i</b> , 24, 45, 56, 63, 72, 86, 98, 118, 138, 150, 154, 170, 176, 178, 183, 206, 245, 249, 275, 284, 305, 323, 355, 379, 380, 409, 411, 418, 466, 492, 520, 540, 615, 670, 679, 703, 728, 735, 796, 806, 812, 819, 839, 921, 928, 1002, 1009, 1040, 1046, 1052, 1068, 1103, 1113, 1117, 1168, 1177, 1179, 1191, 1199, 1205, 1236, 1304, 1313, 1347, 1397, 1432, 1456, 1475, 1481, 1482, 1482, 1489, 1491, 1511, 1511, 1689, 1690, 1764, 1854, 3078, 3090, 3132, 3168, 3178, 3200, 3204, 3217, 3233, 3240, 3247, 3251, 3790 | 27, 33, 53, 56, 71, 81, 85, 101, 113, 131, 145, 151, 161, 169, 185, 186, 212, 240, 263, 272, 288, 316, 341, 356, 366, 376, 393, 408, 422, 467, 518, 539, 615, 679, 684, 705, 729, 732, 761, 788, 793, 796, 811, 838, 920, 929, 1001, 1008, 1039, 1045, 1053, 1103, 1112, 1116, 1168, 1177, 1180, 1191, 1191, 1203, 1208, 1235, 1306, 1314, 1349, 1395, 1430, 1456, 1479, 1481, 1486, 1488, 1489, 1493, 1510, 1511, 1689, 1690, 1760, 1852, 3068, 3080, 3133, 3151, 3163, 3190, 3203, 3207, 3233, 3240, 3246, 3251, 3800 |
| Rotational constants (GHz)                                                                                                                                                                                                                                                                                                                                                                                                                                                                                              | Rotational constants (GHz)                                                                                                                                                                                                                                                                                                                                                                                                                                                                                                       | Rotational constants (GHz)                                                                                                                                                                                                                                                                                                                                                                                                                                                                                              |
| 0.48193, 0.19436, 0.18803                                                                                                                                                                                                                                                                                                                                                                                                                                                                                               | 0.48595, 0.18982, 0.18610                                                                                                                                                                                                                                                                                                                                                                                                                                                                                                        | 0.44286, 0.19425, 0.17693                                                                                                                                                                                                                                                                                                                                                                                                                                                                                               |

**Table S89.** Rate constants in aqueous phase calculated at the M06-2X/6-311++G(3df,3pd)//M06-2X/6-31+G(d,p) level of theory.

(a) abstraction pathways

| T (K) | k (L mol <sup>-1</sup> s <sup>-1</sup> ) |                        |                        |                        |                        |                        |                        |                        |                        |                        |                        |                        |          |
|-------|------------------------------------------|------------------------|------------------------|------------------------|------------------------|------------------------|------------------------|------------------------|------------------------|------------------------|------------------------|------------------------|----------|
|       | H20-abs                                  | H21-abs                | H22-abs                | H23-abs                | H24-abs                | H25-abs                | H26-abs                | H27-abs                | H28-abs                | H29-abs                | H30-abs                | H31-abs                | FHT      |
| 253   | 4.33 × 10 <sup>7</sup>                   | 1.13 × 10 <sup>7</sup> | 1.16 × 10 <sup>5</sup> | 7.90 × 10 <sup>4</sup> | 2.04 × 10 <sup>4</sup> | 3.73 × 10 <sup>4</sup> | 2.13 × 10 <sup>7</sup> | 5.61 × 10 <sup>6</sup> | 8.10 × 10 <sup>6</sup> | 5.17 × 10 <sup>6</sup> | 1.87 × 10 <sup>7</sup> | 5.47 × 10 <sup>7</sup> | 1.69E+08 |
| 258   | 4.32 × 10 <sup>7</sup>                   | 1.09 × 10 <sup>7</sup> | 1.20 × 10 <sup>5</sup> | 8.01 × 10 <sup>4</sup> | 2.24 × 10 <sup>4</sup> | 4.09 × 10 <sup>4</sup> | 2.17 × 10 <sup>7</sup> | 5.77 × 10 <sup>6</sup> | 7.84 × 10 <sup>6</sup> | 5.22 × 10 <sup>6</sup> | 1.86 × 10 <sup>7</sup> | 5.67 × 10 <sup>7</sup> | 1.70E+08 |
| 263   | 4.29 × 10 <sup>7</sup>                   | 1.06 × 10 <sup>7</sup> | 1.24 × 10 <sup>5</sup> | 8.17 × 10 <sup>4</sup> | 2.46 × 10 <sup>4</sup> | 4.49 × 10 <sup>4</sup> | 2.22 × 10 <sup>7</sup> | 5.94 × 10 <sup>6</sup> | 7.62 × 10 <sup>6</sup> | 5.29 × 10 <sup>6</sup> | 1.84 × 10 <sup>7</sup> | 5.85 × 10 <sup>7</sup> | 1.72E+08 |
| 268   | 4.27 × 10 <sup>7</sup>                   | 1.03 × 10 <sup>7</sup> | 1.29 × 10 <sup>5</sup> | 8.37 × 10 <sup>4</sup> | 2.70 × 10 <sup>4</sup> | 4.93 × 10 <sup>4</sup> | 2.26 × 10 <sup>7</sup> | 6.11 × 10 <sup>6</sup> | 7.42 × 10 <sup>6</sup> | 5.36 × 10 <sup>6</sup> | 1.83 × 10 <sup>7</sup> | 6.03 × 10 <sup>7</sup> | 1.73E+08 |
| 273   | 4.25 × 10 <sup>7</sup>                   | 1.00 × 10 <sup>7</sup> | 1.35 × 10 <sup>5</sup> | 8.60 × 10 <sup>4</sup> | 2.98 × 10 <sup>4</sup> | 5.42 × 10 <sup>4</sup> | 2.30 × 10 <sup>7</sup> | 6.30 × 10 <sup>6</sup> | 7.25 × 10 <sup>6</sup> | 5.45 × 10 <sup>6</sup> | 1.82 × 10 <sup>7</sup> | 6.20 × 10 <sup>7</sup> | 1.75E+08 |
| 278   | 4.23 × 10 <sup>7</sup>                   | 9.80 × 10 <sup>6</sup> | 1.41 × 10 <sup>5</sup> | 8.88 × 10 <sup>4</sup> | 3.28 × 10 <sup>4</sup> | 5.96 × 10 <sup>4</sup> | 2.35 × 10 <sup>7</sup> | 6.49 × 10 <sup>6</sup> | 7.11 × 10 <sup>6</sup> | 5.54 × 10 <sup>6</sup> | 1.81 × 10 <sup>7</sup> | 6.37 × 10 <sup>7</sup> | 1.77E+08 |
| 283   | 4.22 × 10 <sup>7</sup>                   | 9.60 × 10 <sup>6</sup> | 1.49 × 10 <sup>5</sup> | 9.20 × 10 <sup>4</sup> | 3.61 × 10 <sup>4</sup> | 6.56 × 10 <sup>4</sup> | 2.40 × 10 <sup>7</sup> | 6.69 × 10 <sup>6</sup> | 6.99 × 10 <sup>6</sup> | 5.64 × 10 <sup>6</sup> | 1.80 × 10 <sup>7</sup> | 6.55 × 10 <sup>7</sup> | 1.79E+08 |
| 288   | 4.21 × 10 <sup>7</sup>                   | 9.44 × 10 <sup>6</sup> | 1.56 × 10 <sup>5</sup> | 9.55 × 10 <sup>4</sup> | 3.97 × 10 <sup>4</sup> | 7.21 × 10 <sup>4</sup> | 2.45 × 10 <sup>7</sup> | 6.90 × 10 <sup>6</sup> | 6.88 × 10 <sup>6</sup> | 5.74 × 10 <sup>6</sup> | 1.80 × 10 <sup>7</sup> | 6.72 × 10 <sup>7</sup> | 1.81E+08 |
| 293   | 4.22 × 10 <sup>7</sup>                   | 9.30 × 10 <sup>6</sup> | 1.65 × 10 <sup>5</sup> | 9.95 × 10 <sup>4</sup> | 4.38 × 10 <sup>4</sup> | 7.94 × 10 <sup>4</sup> | 2.50 × 10 <sup>7</sup> | 7.12 × 10 <sup>6</sup> | 6.80 × 10 <sup>6</sup> | 5.86 × 10 <sup>6</sup> | 1.79 × 10 <sup>7</sup> | 6.90 × 10 <sup>7</sup> | 1.84E+08 |
| 298   | 4.22 × 10 <sup>7</sup>                   | 9.19 × 10 <sup>6</sup> | 1.74 × 10 <sup>5</sup> | 1.04 × 10 <sup>5</sup> | 4.82 × 10 <sup>4</sup> | 8.73 × 10 <sup>4</sup> | 2.55 × 10 <sup>7</sup> | 7.35 × 10 <sup>6</sup> | 6.72 × 10 <sup>6</sup> | 5.98 × 10 <sup>6</sup> | 1.79 × 10 <sup>7</sup> | 7.09 × 10 <sup>7</sup> | 1.86E+08 |
| 303   | 4.23 × 10 <sup>7</sup>                   | 9.10 × 10 <sup>6</sup> | 1.84 × 10 <sup>5</sup> | 1.09 × 10 <sup>5</sup> | 5.31 × 10 <sup>4</sup> | 9.60 × 10 <sup>4</sup> | 2.61 × 10 <sup>7</sup> | 7.59 × 10 <sup>6</sup> | 6.67 × 10 <sup>6</sup> | 6.11 × 10 <sup>6</sup> | 1.80 × 10 <sup>7</sup> | 7.28 × 10 <sup>7</sup> | 1.89E+08 |
| 308   | 4.25 × 10 <sup>7</sup>                   | 9.03 × 10 <sup>6</sup> | 1.94 × 10 <sup>5</sup> | 1.14 × 10 <sup>5</sup> | 5.84 × 10 <sup>4</sup> | 1.06 × 10 <sup>5</sup> | 2.67 × 10 <sup>7</sup> | 7.84 × 10 <sup>6</sup> | 6.62 × 10 <sup>6</sup> | 6.24 × 10 <sup>6</sup> | 1.80 × 10 <sup>7</sup> | 7.47 × 10 <sup>7</sup> | 1.92E+08 |
| 313   | 4.28 × 10 <sup>7</sup>                   | 8.98 × 10 <sup>6</sup> | 2.06 × 10 <sup>5</sup> | 1.20 × 10 <sup>5</sup> | 6.42 × 10 <sup>4</sup> | 1.16 × 10 <sup>5</sup> | 2.73 × 10 <sup>7</sup> | 8.10 × 10 <sup>6</sup> | 6.59 × 10 <sup>6</sup> | 6.38 × 10 <sup>6</sup> | 1.80 × 10 <sup>7</sup> | 7.67 × 10 <sup>7</sup> | 1.95E+08 |
| 318   | 4.30 × 10 <sup>7</sup>                   | 8.94 × 10 <sup>6</sup> | 2.18 × 10 <sup>5</sup> | 1.26 × 10 <sup>5</sup> | 7.06 × 10 <sup>4</sup> | 1.27 × 10 <sup>5</sup> | 2.79 × 10 <sup>7</sup> | 8.36 × 10 <sup>6</sup> | 6.56 × 10 <sup>6</sup> | 6.53 × 10 <sup>6</sup> | 1.81 × 10 <sup>7</sup> | 7.88 × 10 <sup>7</sup> | 1.99E+08 |
| 323   | 4.34 × 10 <sup>7</sup>                   | 8.92 × 10 <sup>6</sup> | 2.31 × 10 <sup>5</sup> | 1.33 × 10 <sup>5</sup> | 7.75 × 10 <sup>4</sup> | 1.40 × 10 <sup>5</sup> | 2.86 × 10 <sup>7</sup> | 8.64 × 10 <sup>6</sup> | 6.55 × 10 <sup>6</sup> | 6.69 × 10 <sup>6</sup> | 1.82 × 10 <sup>7</sup> | 8.09 × 10 <sup>7</sup> | 2.02E+08 |

## (b) addition pathways

| T (K) | k (L mol <sup>-1</sup> s <sup>-1</sup> ) |                    |                    |                    |                    |                    |                       |                       |                    |                       |          |          |          |
|-------|------------------------------------------|--------------------|--------------------|--------------------|--------------------|--------------------|-----------------------|-----------------------|--------------------|-----------------------|----------|----------|----------|
|       | C1-add                                   | C2-add             | C3-add             | C4-add             | C5-add             | C6-add             | C7-add                | C9-add                | P-12add            | S17-add               | RAF      | SET      | Overall  |
| 253   | $5.84 \times 10^5$                       | $3.32 \times 10^5$ | $2.26 \times 10^5$ | $1.21 \times 10^5$ | $1.87 \times 10^5$ | $5.81 \times 10^5$ | $1.04 \times 10^{-4}$ | $2.26 \times 10^{-4}$ | $4.44 \times 10^8$ | $9.06 \times 10^{-3}$ | 4.46E+08 | 5.30E-19 | 6.15E+08 |
| 258   | $6.45 \times 10^5$                       | $3.66 \times 10^5$ | $2.53 \times 10^5$ | $1.36 \times 10^5$ | $2.09 \times 10^5$ | $6.32 \times 10^5$ | $1.69 \times 10^{-4}$ | $3.65 \times 10^{-4}$ | $5.42 \times 10^8$ | $1.42 \times 10^{-2}$ | 5.44E+08 | 2.33E-18 | 7.14E+08 |
| 263   | $7.10 \times 10^5$                       | $4.02 \times 10^5$ | $2.83 \times 10^5$ | $1.52 \times 10^5$ | $2.32 \times 10^5$ | $6.86 \times 10^5$ | $2.70 \times 10^{-4}$ | $5.80 \times 10^{-4}$ | $6.43 \times 10^8$ | $2.18 \times 10^{-2}$ | 6.46E+08 | 9.69E-18 | 8.17E+08 |
| 268   | $7.80 \times 10^5$                       | $4.40 \times 10^5$ | $3.15 \times 10^5$ | $1.69 \times 10^5$ | $2.57 \times 10^5$ | $7.44 \times 10^5$ | $4.26 \times 10^{-4}$ | $9.08 \times 10^{-4}$ | $7.45 \times 10^8$ | $3.31 \times 10^{-2}$ | 7.48E+08 | 3.83E-17 | 9.21E+08 |
| 273   | $8.54 \times 10^5$                       | $4.81 \times 10^5$ | $3.50 \times 10^5$ | $1.88 \times 10^5$ | $2.85 \times 10^5$ | $8.04 \times 10^5$ | $6.61 \times 10^{-4}$ | $1.40 \times 10^{-3}$ | $8.43 \times 10^8$ | $4.94 \times 10^{-2}$ | 8.46E+08 | 1.44E-16 | 1.02E+09 |
| 278   | $9.33 \times 10^5$                       | $5.25 \times 10^5$ | $3.87 \times 10^5$ | $2.08 \times 10^5$ | $3.14 \times 10^5$ | $8.67 \times 10^5$ | $1.01 \times 10^{-3}$ | $2.12 \times 10^{-3}$ | $9.33 \times 10^8$ | $7.28 \times 10^{-2}$ | 9.37E+08 | 5.15E-16 | 1.11E+09 |
| 283   | $1.02 \times 10^6$                       | $5.71 \times 10^5$ | $4.28 \times 10^5$ | $2.30 \times 10^5$ | $3.45 \times 10^5$ | $9.33 \times 10^5$ | $1.52 \times 10^{-3}$ | $3.18 \times 10^{-3}$ | $1.01 \times 10^9$ | $1.06 \times 10^{-1}$ | 1.02E+09 | 1.77E-15 | 1.20E+09 |
| 288   | $1.11 \times 10^6$                       | $6.20 \times 10^5$ | $4.71 \times 10^5$ | $2.53 \times 10^5$ | $3.79 \times 10^5$ | $1.00 \times 10^6$ | $2.26 \times 10^{-3}$ | $4.70 \times 10^{-3}$ | $1.08 \times 10^9$ | $1.52 \times 10^{-1}$ | 1.08E+09 | 5.80E-15 | 1.26E+09 |
| 293   | $1.20 \times 10^6$                       | $6.72 \times 10^5$ | $5.17 \times 10^5$ | $2.78 \times 10^5$ | $4.14 \times 10^5$ | $1.08 \times 10^6$ | $3.32 \times 10^{-3}$ | $6.86 \times 10^{-3}$ | $1.13 \times 10^9$ | $2.16 \times 10^{-1}$ | 1.14E+09 | 1.83E-14 | 1.32E+09 |
| 298   | $1.30 \times 10^6$                       | $7.27 \times 10^5$ | $5.66 \times 10^5$ | $3.04 \times 10^5$ | $4.52 \times 10^5$ | $1.15 \times 10^6$ | $4.82 \times 10^{-3}$ | $9.89 \times 10^{-3}$ | $1.17 \times 10^9$ | $3.04 \times 10^{-1}$ | 1.17E+09 | 5.57E-14 | 1.36E+09 |
| 303   | $1.40 \times 10^6$                       | $7.84 \times 10^5$ | $6.19 \times 10^5$ | $3.32 \times 10^5$ | $4.93 \times 10^5$ | $1.23 \times 10^6$ | $6.91 \times 10^{-3}$ | $1.41 \times 10^{-2}$ | $1.20 \times 10^9$ | $4.23 \times 10^{-1}$ | 1.20E+09 | 1.63E-13 | 1.39E+09 |
| 308   | $1.51 \times 10^6$                       | $8.45 \times 10^5$ | $6.75 \times 10^5$ | $3.62 \times 10^5$ | $5.35 \times 10^5$ | $1.31 \times 10^6$ | $9.80 \times 10^{-3}$ | $1.99 \times 10^{-2}$ | $1.21 \times 10^9$ | $5.81 \times 10^{-1}$ | 1.21E+09 | 4.63E-13 | 1.41E+09 |
| 313   | $1.63 \times 10^6$                       | $9.09 \times 10^5$ | $7.35 \times 10^5$ | $3.94 \times 10^5$ | $5.81 \times 10^5$ | $1.40 \times 10^6$ | $1.37 \times 10^{-2}$ | $2.78 \times 10^{-2}$ | $1.21 \times 10^9$ | $7.92 \times 10^{-1}$ | 1.22E+09 | 1.27E-12 | 1.41E+09 |
| 318   | $1.75 \times 10^6$                       | $9.75 \times 10^5$ | $7.98 \times 10^5$ | $4.28 \times 10^5$ | $6.28 \times 10^5$ | $1.49 \times 10^6$ | $1.91 \times 10^{-2}$ | $3.84 \times 10^{-2}$ | $1.20 \times 10^9$ | $1.07 \times 10^0$    | 1.21E+09 | 3.37E-12 | 1.41E+09 |
| 323   | $1.88 \times 10^6$                       | $1.05 \times 10^6$ | $8.65 \times 10^5$ | $4.64 \times 10^5$ | $6.79 \times 10^5$ | $1.58 \times 10^6$ | $2.63 \times 10^{-2}$ | $5.26 \times 10^{-2}$ | $1.19 \times 10^9$ | $1.43 \times 10^0$    | 1.20E+09 | 8.70E-12 | 1.40E+09 |

**Table S90.** Branching ratio ( $\Gamma$ , %) in aqueous phase calculated at the M06-2X/6-311++G(3df,3pd)//M06-2X/6-31+G(d,p) level of theory.

(a) abstraction pathways

| T (K) | Branching ratio ( $\Gamma$ , %) |         |         |         |         |         |         |         |         |         |         |         |        |
|-------|---------------------------------|---------|---------|---------|---------|---------|---------|---------|---------|---------|---------|---------|--------|
|       | H20-abs                         | H21-abs | H22-abs | H23-abs | H24-abs | H25-abs | H26-abs | H27-abs | H28-abs | H29-abs | H30-abs | H31-abs | FHT    |
| 253   | 7.05%                           | 1.84%   | 0.02%   | 0.01%   | 0.00%   | 0.01%   | 3.47%   | 0.91%   | 1.32%   | 0.84%   | 3.05%   | 8.90%   | 27.41% |
| 258   | 6.04%                           | 1.53%   | 0.02%   | 0.01%   | 0.00%   | 0.01%   | 3.05%   | 0.81%   | 1.10%   | 0.73%   | 2.60%   | 7.94%   | 23.83% |
| 263   | 5.25%                           | 1.30%   | 0.02%   | 0.01%   | 0.00%   | 0.01%   | 2.71%   | 0.73%   | 0.93%   | 0.65%   | 2.25%   | 7.16%   | 21.01% |
| 268   | 4.63%                           | 1.12%   | 0.01%   | 0.01%   | 0.00%   | 0.01%   | 2.45%   | 0.66%   | 0.81%   | 0.58%   | 1.99%   | 6.55%   | 18.82% |
| 273   | 4.16%                           | 0.98%   | 0.01%   | 0.01%   | 0.00%   | 0.01%   | 2.25%   | 0.62%   | 0.71%   | 0.53%   | 1.78%   | 6.07%   | 17.14% |
| 278   | 3.80%                           | 0.88%   | 0.01%   | 0.01%   | 0.00%   | 0.01%   | 2.11%   | 0.58%   | 0.64%   | 0.50%   | 1.62%   | 5.72%   | 15.88% |
| 283   | 3.53%                           | 0.80%   | 0.01%   | 0.01%   | 0.00%   | 0.01%   | 2.00%   | 0.56%   | 0.58%   | 0.47%   | 1.51%   | 5.48%   | 14.96% |
| 288   | 3.33%                           | 0.75%   | 0.01%   | 0.01%   | 0.00%   | 0.01%   | 1.93%   | 0.55%   | 0.54%   | 0.45%   | 1.42%   | 5.32%   | 14.32% |
| 293   | 3.19%                           | 0.70%   | 0.01%   | 0.01%   | 0.00%   | 0.01%   | 1.89%   | 0.54%   | 0.51%   | 0.44%   | 1.36%   | 5.23%   | 13.91% |
| 298   | 3.10%                           | 0.68%   | 0.01%   | 0.01%   | 0.00%   | 0.01%   | 1.88%   | 0.54%   | 0.49%   | 0.44%   | 1.32%   | 5.21%   | 13.68% |
| 303   | 3.05%                           | 0.66%   | 0.01%   | 0.01%   | 0.00%   | 0.01%   | 1.88%   | 0.55%   | 0.48%   | 0.44%   | 1.29%   | 5.24%   | 13.61% |
| 308   | 3.03%                           | 0.64%   | 0.01%   | 0.01%   | 0.00%   | 0.01%   | 1.90%   | 0.56%   | 0.47%   | 0.44%   | 1.28%   | 5.32%   | 13.67% |
| 313   | 3.03%                           | 0.64%   | 0.01%   | 0.01%   | 0.00%   | 0.01%   | 1.94%   | 0.57%   | 0.47%   | 0.45%   | 1.28%   | 5.44%   | 13.85% |
| 318   | 3.06%                           | 0.64%   | 0.02%   | 0.01%   | 0.01%   | 0.01%   | 1.99%   | 0.59%   | 0.47%   | 0.46%   | 1.29%   | 5.60%   | 14.12% |
| 323   | 3.10%                           | 0.64%   | 0.02%   | 0.01%   | 0.01%   | 0.01%   | 2.05%   | 0.62%   | 0.47%   | 0.48%   | 1.30%   | 5.79%   | 14.49% |

## (b) addition pathways

| T (K) | Branching ratio ( $\Gamma$ , %) |        |        |        |        |        |        |        |         |         |        |       | Overall |
|-------|---------------------------------|--------|--------|--------|--------|--------|--------|--------|---------|---------|--------|-------|---------|
|       | C1-add                          | C2-add | C3-add | C4-add | C5-add | C6-add | C7-add | C9-add | P-12add | S17-add | RAF    | SET   |         |
| 253   | 0.09%                           | 0.05%  | 0.04%  | 0.02%  | 0.03%  | 0.09%  | 0.00%  | 0.00%  | 72.26%  | 0.00%   | 72.59% | 0.00% | 100.00% |
| 258   | 0.09%                           | 0.05%  | 0.04%  | 0.02%  | 0.03%  | 0.09%  | 0.00%  | 0.00%  | 75.85%  | 0.00%   | 76.17% | 0.00% | 100.00% |
| 263   | 0.09%                           | 0.05%  | 0.03%  | 0.02%  | 0.03%  | 0.08%  | 0.00%  | 0.00%  | 78.69%  | 0.00%   | 78.99% | 0.00% | 100.00% |
| 268   | 0.08%                           | 0.05%  | 0.03%  | 0.02%  | 0.03%  | 0.08%  | 0.00%  | 0.00%  | 80.89%  | 0.00%   | 81.18% | 0.00% | 100.00% |
| 273   | 0.08%                           | 0.05%  | 0.03%  | 0.02%  | 0.03%  | 0.08%  | 0.00%  | 0.00%  | 82.57%  | 0.00%   | 82.86% | 0.00% | 100.00% |
| 278   | 0.08%                           | 0.05%  | 0.03%  | 0.02%  | 0.03%  | 0.08%  | 0.00%  | 0.00%  | 83.83%  | 0.00%   | 84.12% | 0.00% | 100.00% |
| 283   | 0.09%                           | 0.05%  | 0.04%  | 0.02%  | 0.03%  | 0.08%  | 0.00%  | 0.00%  | 84.74%  | 0.00%   | 85.04% | 0.00% | 100.00% |
| 288   | 0.09%                           | 0.05%  | 0.04%  | 0.02%  | 0.03%  | 0.08%  | 0.00%  | 0.00%  | 85.38%  | 0.00%   | 85.68% | 0.00% | 100.00% |
| 293   | 0.09%                           | 0.05%  | 0.04%  | 0.02%  | 0.03%  | 0.08%  | 0.00%  | 0.00%  | 85.78%  | 0.00%   | 86.09% | 0.00% | 100.00% |
| 298   | 0.10%                           | 0.05%  | 0.04%  | 0.02%  | 0.03%  | 0.08%  | 0.00%  | 0.00%  | 85.99%  | 0.00%   | 86.32% | 0.00% | 100.00% |
| 303   | 0.10%                           | 0.06%  | 0.04%  | 0.02%  | 0.04%  | 0.09%  | 0.00%  | 0.00%  | 86.04%  | 0.00%   | 86.39% | 0.00% | 100.00% |
| 308   | 0.11%                           | 0.06%  | 0.05%  | 0.03%  | 0.04%  | 0.09%  | 0.00%  | 0.00%  | 85.95%  | 0.00%   | 86.33% | 0.00% | 100.00% |
| 313   | 0.12%                           | 0.06%  | 0.05%  | 0.03%  | 0.04%  | 0.10%  | 0.00%  | 0.00%  | 85.75%  | 0.00%   | 86.15% | 0.00% | 100.00% |
| 318   | 0.12%                           | 0.07%  | 0.06%  | 0.03%  | 0.04%  | 0.11%  | 0.00%  | 0.00%  | 85.44%  | 0.00%   | 85.88% | 0.00% | 100.00% |
| 323   | 0.13%                           | 0.07%  | 0.06%  | 0.03%  | 0.05%  | 0.11%  | 0.00%  | 0.00%  | 85.05%  | 0.00%   | 85.51% | 0.00% | 100.00% |

**Table S91:** Calculated standard enthalpies of reaction ( $\Delta_r H_{298\text{K}}$ ) and standard Gibbs energies of reaction ( $\Delta_r G_{298\text{K}}$ ), enthalpy of activation ( $\Delta H^\ddagger_{298\text{K}}$ ) and Gibbs energy of activation ( $\Delta G^\ddagger_{298\text{K}}$ ) at 298 K for FHT reactions in the gas phase using the M06-2X/6-311++G(3df,3pd)// M06-2X/6-31+G(d,p) level of theory.

| Position | $\Delta_r H_{298\text{K}}$ ,<br>(kJ/mol) | $\Delta_r G_{298\text{K}}$ ,<br>(kJ/mol) | $\Delta H^\ddagger_{298\text{K}}$ ,<br>(kJ/mol) | $\Delta G^\ddagger_{298\text{K}}$ ,<br>(kJ/mol) |
|----------|------------------------------------------|------------------------------------------|-------------------------------------------------|-------------------------------------------------|
| H20      | -100.40                                  | -102.16                                  | -13.87                                          | 28.60                                           |
| H21      | -100.40                                  | -102.16                                  | -13.87                                          | 28.58                                           |
| H22      | -16.20                                   | -17.88                                   | 4.21                                            | 46.30                                           |
| H23      | -16.20                                   | -17.89                                   | 4.21                                            | 46.29                                           |
| H24      | -23.79                                   | -27.71                                   | 17.49                                           | 52.95                                           |
| H25      | -23.88                                   | -26.63                                   | 17.01                                           | 52.02                                           |
| H26      | -78.33                                   | -78.07                                   | -6.56                                           | 36.65                                           |
| H27      | -78.32                                   | -78.05                                   | -5.29                                           | 37.92                                           |
| H28      | -78.33                                   | -78.58                                   | 2.24                                            | 42.64                                           |
| H29      | -78.33                                   | -78.08                                   | 2.24                                            | 42.68                                           |
| H30      | -78.32                                   | -78.05                                   | -5.50                                           | 36.55                                           |
| H31      | -78.32                                   | -78.57                                   | -6.35                                           | 38.48                                           |

**Table S92:** Relative standard reaction enthalpies at 0K for reactant complex (RC), transition states (TS), product complex (PC) and product (P) of FHT reactions in the gas phase using the M06-2X/6-311++G(3df,3pd)// M06-2X/6-31+G(d,p) level of theory.

| Position | RC     | TS    | PC      | P       |
|----------|--------|-------|---------|---------|
| H20      | -30.35 | -9.80 | -121.25 | -101.36 |
| H21      | -30.35 | -9.80 | -121.27 | -101.36 |
| H22      | -29.25 | 7.87  | -42.52  | -16.60  |
| H23      | -24.32 | 7.86  | -42.52  | -16.60  |
| H24      | -27.34 | 19.63 | -33.36  | -24.55  |
| H25      | -27.35 | 18.98 | -33.33  | -24.51  |
| H26      | -30.35 | -2.29 | -102.26 | -78.82  |
| H27      | -21.84 | -1.40 | -95.70  | -78.81  |
| H28      | -27.35 | 5.95  | -102.27 | -78.82  |
| H29      | -27.35 | 5.96  | -102.24 | -78.83  |
| H30      | -21.20 | -1.22 | -93.22  | -78.81  |
| H31      | -24.32 | -1.73 | -102.26 | -78.81  |

**Table S93:** Calculated standard enthalpies of reaction ( $\Delta_r H_{298K}$ ) and standard Gibbs energies of reaction ( $\Delta_r G_{298K}$ ), enthalpy of activation ( $\Delta H^\ddagger_{298K}$ ) and Gibbs energy of activation ( $\Delta G^\ddagger_{298K}$ ) at 298 K for FHT reactions in the aqueous phase using the M06-2X/6-311++G(3df,3pd)//M06-2X/6-31+G(d,p) level of theory.

| Positions | $\Delta_r H_{298K}$ ,<br>(kJ/mol) | $\Delta_r G_{298K}$ ,<br>(kJ/mol) | $\Delta H^\ddagger_{298K}$ ,<br>(kJ/mol) | $\Delta G^\ddagger_{298K}$ ,<br>(kJ/mol) |
|-----------|-----------------------------------|-----------------------------------|------------------------------------------|------------------------------------------|
| H20       | -98.21                            | -100.78                           | 3.74                                     | 41.52                                    |
| H21       | -98.21                            | -100.74                           | 2.85                                     | 45.66                                    |
| H22       | -24.08                            | -27.07                            | 18.87                                    | 58.03                                    |
| H23       | -24.10                            | -27.12                            | 18.82                                    | 59.65                                    |
| H24       | -31.03                            | -35.46                            | 21.29                                    | 59.42                                    |
| H25       | -30.99                            | -33.81                            | 21.00                                    | 57.92                                    |
| H26       | -79.95                            | -82.78                            | 4.13                                     | 41.59                                    |
| H27       | -81.39                            | -84.96                            | 5.64                                     | 43.11                                    |
| H28       | -81.40                            | -85.04                            | 1.93                                     | 45.87                                    |
| H29       | -85.57                            | -89.85                            | 4.97                                     | 45.55                                    |
| H30       | -85.57                            | -89.91                            | 1.15                                     | 42.66                                    |
| H31       | -84.03                            | -90.43                            | 4.15                                     | 38.85                                    |



**Table S94:** Relative standard reaction enthalpies (in kJ/mol) at 0K for reactant complex (RC), transition states (TS), product complex (PC) and product (P) of FHT reactions in the aqueous phase using the M06-2X/6-311++G(3df,3pd)// M06-2X/6-31+G(d,p) level of theory.

| <b>Positions</b> | <b>RC</b> | <b>TS</b> | <b>PC</b> | <b>P</b> |
|------------------|-----------|-----------|-----------|----------|
| H20              | -15.29    | 6.83      | -110.58   | -99.31   |
| H21              | -17.17    | 6.78      | -104.75   | -99.30   |
| H22              | -11.21    | 22.11     | -34.79    | -24.45   |
| H23              | -15.03    | 22.35     | -37.42    | -24.77   |
| H24              | -10.03    | 24.09     | -34.69    | -31.80   |
| H25              | -9.93     | 23.39     | -35.34    | -31.65   |
| H26              | -11.07    | 7.60      | -92.42    | -80.93   |
| H27              | -8.92     | 9.08      | -91.67    | -82.33   |
| H28              | -17.21    | 6.79      | -95.18    | -82.35   |
| H29              | -12.32    | 8.88      | -100.33   | -86.86   |
| H30              | -11.08    | 5.05      | -98.94    | -86.88   |
| H31              | -10.58    | 7.10      | -95.81    | -86.09   |

**Table S95:** Relative standard reaction enthalpies at 0K for reactant complex (RC), transition states (TS), and product (P) of RAF reactions in the gas phase using the M06-2X/6-311++G(3df,3pd)// M06-2X/6-31+G(d,p) level of theory.

| <b>Position</b> | <b>RC</b> | <b>TS</b> | <b>P</b> |
|-----------------|-----------|-----------|----------|
| C1              | -12.39    | 11.79     | -82.11   |
| C2              | -27.31    | 5.59      | -79.06   |
| C3              | -15.78    | 13.60     | -63.35   |
| C4              | -15.67    | 13.57     | -63.35   |
| C5              | -27.33    | 5.59      | -79.06   |
| C6              | -27.73    | 10.10     | -82.44   |
| C7              | -30.34    | 46.17     | -20.67   |
| C9              | -30.35    | 46.16     | -20.67   |
| S17             | -21.50    | 38.08     | 12.42    |
| P12             | -21.69    | -13.84    | -198.15  |

**Table S96:** Calculated standard enthalpies of reaction ( $\Delta_r H_{298\text{K}}$ ) and standard Gibbs energies of reaction ( $\Delta_r G_{298\text{K}}$ ), enthalpy of activation ( $\Delta H^\ddagger_{298\text{K}}$ ) and Gibbs energy of activation ( $\Delta G^\ddagger_{298\text{K}}$ ) at 298 K for RAF reactions in the gas phase using the M06-2X/6-311++G(3df,3pd)// M06-2X/6-31+G(d,p) level of theory.

| Position | $\Delta_r H_{298\text{K}}$ ,<br>(kJ/mol) | $\Delta_r G_{298\text{K}}$ ,<br>(kJ/mol) | $\Delta H^\ddagger_{298\text{K}}$ ,<br>(kJ/mol) | $\Delta G^\ddagger_{298\text{K}}$ ,<br>(kJ/mol) |
|----------|------------------------------------------|------------------------------------------|-------------------------------------------------|-------------------------------------------------|
| C1       | -86.66                                   | -43.16                                   | 8.43                                            | 47.56                                           |
| C2       | -84.56                                   | -35.51                                   | 0.52                                            | 47.59                                           |
| C3       | -68.12                                   | -21.77                                   | 9.86                                            | 49.93                                           |
| C4       | -68.12                                   | -21.77                                   | 9.85                                            | 52.45                                           |
| C5       | -84.56                                   | -35.51                                   | 0.52                                            | 47.58                                           |
| C6       | -86.77                                   | -47.81                                   | 6.39                                            | 46.22                                           |
| C7       | -25.47                                   | 18.76                                    | 41.40                                           | 86.37                                           |
| C9       | -25.47                                   | 18.75                                    | 41.40                                           | 86.35                                           |
| S17      | 10.76                                    | 44.81                                    | 35.17                                           | 72.39                                           |
| P12      | -200.58                                  | -163.99                                  | -18.04                                          | 24.73                                           |

**Table S97:** Calculated standard enthalpies of reaction ( $\Delta_r H_{298K}$ ) and standard Gibbs energies of reaction ( $\Delta_r G_{298K}$ ), enthalpy of activation ( $\Delta H^\ddagger_{298K}$ ) and Gibbs energy of activation ( $\Delta G^\ddagger_{298K}$ ) at 298 K for RAF reactions in the aqueous phase using the M06-2X/6-311++G(3df,3pd)//M06-2X/6-31+G(d,p) level of theory.

| Positions | $\Delta_r H_{298K}$ ,<br>(kJ/mol) | $\Delta_r G_{298K}$ ,<br>(kJ/mol) | $\Delta H^\ddagger_{298K}$ ,<br>(kJ/mol) | $\Delta G^\ddagger_{298K}$ ,<br>(kJ/mol) |
|-----------|-----------------------------------|-----------------------------------|------------------------------------------|------------------------------------------|
| C1        | -86.16                            | -44.16                            | 7.83                                     | 46.68                                    |
| C2        | -76.41                            | -31.60                            | 7.91                                     | 48.24                                    |
| C3        | -65.60                            | -19.22                            | 9.54                                     | 48.73                                    |
| C4        | -66.50                            | -20.89                            | 9.51                                     | 50.27                                    |
| C5        | -78.53                            | -37.31                            | 9.10                                     | 49.33                                    |
| C6        | -86.65                            | -43.36                            | 6.21                                     | 46.98                                    |
| C7        | -3.80                             | 39.87                             | 51.44                                    | 94.13                                    |
| C9        | -19.33                            | 24.31                             | 50.61                                    | 93.51                                    |
| S17       | 25.72                             | 58.92                             | 45.53                                    | 84.46                                    |
| P12       | -182.58                           | -149.59                           | -15.13                                   | 27.70                                    |

**Table S98:** Relative standard reaction enthalpies (in kJ/mol) at 0 K for reactant complex (RC), transition states (TS), product complex (PC) and product (P) of RAF reactions in the aqueous phase using the M06-2X/6-311++G(3df,3pd)// M06-2X/6-31+G(d,p) level of theory.

| <b>Positions</b> | <b>RC</b> | <b>TS</b> | <b>P</b> |
|------------------|-----------|-----------|----------|
| C1               | -9.45     | 11.26     | -81.80   |
| C2               | -16.59    | 11.54     | -71.89   |
| C3               | -11.51    | 12.71     | -60.65   |
| C4               | -11.10    | 12.88     | -61.87   |
| C5               | -11.19    | 12.79     | -74.36   |
| C6               | -11.88    | 9.82      | -82.00   |
| C7               | -8.01     | 56.22     | 0.91     |
| C9               | -8.24     | 55.39     | -14.56   |
| S17              | -11.31    | 48.75     | 27.13    |
| P12              | -18.57    | -10.17    | -180.69  |
